# Supplementary material for: Integrative Analyses of mRNA Expression Profile Reveal SOCS2 and CISH Play Important Roles in GHR Mutation-Induced Excessive Abdominal Fat Deposition in the Sex-Linked Dwarf Chicken
Source: Front Genet. 2021 Jan 14;11:610605. doi: 10.3389/fgene.2020.610605 (PMC7841439; doi:10.3389/fgene.2020.610605)
Supplement: Supplementary File 4 — The distribution of DEGs between ND-vs-NN and HD-vs-HN in the liver. [file Table_4.XLS]

## Sheet: ND_fat-VS-NN_fat.DEGseq_Method.
GeneID	Length	ND_fat-Expression	NN_fat-Expression	log2Ratio(NN_fat/ND_fat)	q-value(Storey et al. 2003)	Up-Down-Regulation(NN_fat/ND_fat)	p-value	Symbol	Cellular Component	Molecular Function	Biological Process	Kegg Orthology	Nr Description
396536	980	102788	475663	2.2221	0	Up	0	APOA1	GO:0070062//extracellular exosome;GO:0072562//blood microparticle;GO:0030139//endocytic vesicle;GO:0042627//chylomicron;GO:0034361//very-low-density lipoprotein particle;GO:0034366//spherical high-density lipoprotein particle	GO:0001540//amyloid-beta binding;GO:0031210//phosphatidylcholine binding;GO:0015485//cholesterol binding;GO:0042802//identical protein binding;GO:0070653//high-density lipoprotein particle receptor binding;GO:0017127//cholesterol transporter activity;GO:0008035//high-density lipoprotein particle binding;GO:0005543//phospholipid binding;GO:0034191//apolipoprotein A-I receptor binding;GO:0060228//p…	GO:0010804//negative regulation of tumor necrosis factor-mediated signaling pathway;GO:0050713//negative regulation of interleukin-1 beta secretion;GO:0043534//blood vessel endothelial cell migration;GO:0033344//cholesterol efflux;GO:0050728//negative regulation of inflammatory response;GO:0045445//myoblast differentiation;GO:0070328//triglyceride homeostasis;GO:0051346//negative regulation of hy…	K08757//apolipoprotein A-I	gi|45382961|ref|NP_990856.1|//apolipoprotein A-I preproprotein [Gallus gallus];gi|971431348|ref|XP_015153457.1|//PREDICTED: apolipoprotein A-I isoform X1 [Gallus gallus]
418892	5859	55888	245204	2.1452	0	Up	0	LOC418892	GO:0005615//extracellular space	GO:0004252//serine-type endopeptidase activity;GO:0004866//endopeptidase inhibitor activity	GO:0030449//regulation of complement activation;GO:0010951//negative regulation of endopeptidase activity	K03989//complement component 4	gi|363729287|ref|XP_417086.3|//PREDICTED: complement C4 [Gallus gallus]
396197	2081	111064	5634	-4.28926	0	Down	0	ALB	GO:0070062//extracellular exosome;GO:0005634//nucleus;GO:0005783//endoplasmic reticulum;GO:0072562//blood microparticle;GO:0043209//myelin sheath;GO:0060417//yolk;GO:0043234//protein complex;GO:0005794//Golgi apparatus	GO:0003677//DNA binding;GO:0015643//toxic substance binding;GO:0051087//chaperone binding;GO:0019825//oxygen binding;GO:0046872//metal ion binding;GO:0008144//drug binding;GO:0005504//fatty acid binding;GO:0030170//pyridoxal phosphate binding;GO:0036094//small molecule binding	GO:0006810//transport;GO:0009267//cellular response to starvation;GO:0001895//retina homeostasis;GO:0043066//negative regulation of apoptotic process;GO:0009615//response to virus;GO:0033189//response to vitamin A;GO:0051659//maintenance of mitochondrion location;GO:0019836//hemolysis by symbiont of host erythrocytes	K16141//serum albumin	gi|766944282|ref|NP_990592.2|//serum albumin precursor [Gallus gallus]
418233	3378	138938	20256	-2.76619	0	Down	0	PNPLA3	NA	NA	NA	K16816//patatin-like phospholipase domain-containing protein 2 [EC:3.1.1.3]	gi|971373198|ref|XP_015146675.1|//PREDICTED: patatin-like phospholipase domain-containing protein 2 isoform X3 [Gallus gallus];gi|971373196|ref|XP_015146672.1|//PREDICTED: patatin-like phospholipase domain-containing protein 3 isoform X2 [Gallus gallus];gi|971373194|ref|XP_015146666.1|//PREDICTED: patatin-like phospholipase domain-containing protein 2 isoform X1 [Gallus gallus]
395532	4543	371943	160423	-1.20137	0	Down	0	COL1A1	NA	NA	NA	K06236//collagen, type I, alpha	gi|971447506|ref|XP_015128714.1|//PREDICTED: LOW QUALITY PROTEIN: collagen alpha-1(I) chain [Gallus gallus]
107052718	3048	68761.3	196791	1.52882	0	Up	0	LOC107052718	NA	NA	NA	K04257//olfactory receptor;K21125//mucin-5AC;K05249//neuromedin U;K01495//GTP cyclohydrolase I [EC:3.5.4.16]	gi|971371235|ref|XP_015138148.1|//PREDICTED: endogenous retrovirus group K member 11 Pol protein [Gallus gallus]
107052719	3029	47139	158948	1.76539	0	Up	0	LOC107052719	NA	NA	NA	K04257//olfactory receptor;K04004//complement factor H	gi|971371237|ref|XP_015138157.1|//PREDICTED: uncharacterized protein LOC107052719 isoform X1 [Gallus gallus];gi|971371239|ref|XP_015138163.1|//PREDICTED: uncharacterized protein LOC107052719 isoform X2 [Gallus gallus]
416928	959	57374	1207	-5.55907	0	Down	0	IGLL1	NA	NA	NA	K06554//immunoglobulin lambda-like polypeptide 1	gi|971420846|ref|XP_015130804.1|//PREDICTED: Ig lambda chain V-1 region isoform X5 [Gallus gallus];gi|971420842|ref|XP_015130802.1|//PREDICTED: Ig lambda chain V-1 region isoform X3 [Gallus gallus];gi|971420844|ref|XP_015130803.1|//PREDICTED: Ig lambda chain V-1 region isoform X4 [Gallus gallus];gi|971420838|ref|XP_015130800.1|//PREDICTED: Ig lambda chain V-1 region isoform X1 [Gallus gallus];gi|…
396243	5051	293002	135700	-1.09866	0	Down	0	COL1A2	NA	NA	NA	K06236//collagen, type I, alpha	gi|206597434|ref|NP_001073182.2|//collagen alpha-2(I) chain precursor [Gallus gallus]
373992	9513	209893	88765	-1.22976	0	Down	0	FBN1	NA	NA	NA	K06825//fibrillin 1	gi|971412853|ref|XP_015147420.1|//PREDICTED: fibrillin-1 isoform X1 [Gallus gallus];gi|971412855|ref|XP_015147421.1|//PREDICTED: fibrillin-1 isoform X2 [Gallus gallus]
100857433	1678	120806	43437.6	-1.46384	0	Down	0	PLIN4	NA	NA	NA	K20287//perilipin-3	gi|952556255|ref|NP_001304017.1|//perilipin-4 [Gallus gallus]
396241	2376	47691	7598	-2.6382	0	Down	0	TF	GO:0031012//extracellular matrix;GO:0005615//extracellular space	GO:0046872//metal ion binding	GO:0055072//iron ion homeostasis;GO:0006953//acute-phase response;GO:0032496//response to lipopolysaccharide;GO:0006811//ion transport	K14736//transferrin	gi|45385813|ref|NP_990635.1|//ovotransferrin precursor [Gallus gallus]
396548	8963	161299	76686	-1.06087	0	Down	0	COL6A3	GO:0070062//extracellular exosome;GO:0005615//extracellular space;GO:0042383//sarcolemma;GO:0005581//collagen trimer;GO:0005578//proteinaceous extracellular matrix	GO:0004867//serine-type endopeptidase inhibitor activity	GO:0007155//cell adhesion;GO:0010951//negative regulation of endopeptidase activity	K06238//collagen, type VI, alpha	gi|971404043|ref|XP_015144633.1|//PREDICTED: collagen alpha-3(VI) chain isoform X5 [Gallus gallus];gi|971404045|ref|XP_015144634.1|//PREDICTED: collagen alpha-3(VI) chain isoform X6 [Gallus gallus];gi|971404051|ref|XP_015144637.1|//PREDICTED: collagen alpha-3(VI) chain isoform X9 [Gallus gallus];gi|971404041|ref|XP_015144632.1|//PREDICTED: collagen alpha-3(VI) chain isoform X4 [Gallus gallus];gi|…
395706	1418	27687	1068	-4.6844	0	Down	0	SCD	GO:0016021//integral component of membrane;GO:0005789//endoplasmic reticulum membrane	GO:0005506//iron ion binding;GO:0004768//stearoyl-CoA 9-desaturase activity	GO:0006636//unsaturated fatty acid biosynthetic process;GO:0055114//oxidation-reduction process	K00507//stearoyl-CoA desaturase (Delta-9 desaturase) [EC:1.14.19.1]	gi|45382443|ref|NP_990221.1|//acyl-CoA desaturase [Gallus gallus]
396315	1786	27127	1412	-4.25209	0	Down	0	IGFBP2	GO:0070062//extracellular exosome;GO:0005615//extracellular space	GO:0031994//insulin-like growth factor I binding;GO:0031995//insulin-like growth factor II binding	GO:0001558//regulation of cell growth;GO:0043567//regulation of insulin-like growth factor receptor signaling pathway;GO:0042104//positive regulation of activated T cell proliferation	K10138//insulin-like growth factor-binding protein 3	gi|45382495|ref|NP_990690.1|//insulin-like growth factor-binding protein 2 precursor [Gallus gallus];gi|28372060|emb|CAD66434.1|//insulin-like growth factor binding protein 2, partial [Gallus gallus];gi|971405771|ref|XP_015145275.1|//PREDICTED: insulin-like growth factor-binding protein 2 isoform X1 [Gallus gallus];gi|971405773|ref|XP_015145276.1|//PREDICTED: insulin-like growth factor-binding pr…
107051274	1705	22557	136	-7.36199	0	Down	0	LOC107051274	NA	NA	NA	NA	gi|971451667|ref|XP_015130394.1|//PREDICTED: collagen alpha-2(IV) chain-like [Gallus gallus]
421309	2394	26430	2404	-3.44684	0	Down	0	DGAT2	NA	NA	NA	K11160//diacylglycerol O-acyltransferase 2 [EC:2.3.1.20 2.3.1.75]	gi|363729550|ref|XP_419374.3|//PREDICTED: diacylglycerol O-acyltransferase 2 [Gallus gallus]
429249	6350	9871	42318	2.11183	0	Up	0	LOC429249	NA	NA	NA	K18273//alpha-tectorin	gi|971448161|ref|XP_015128983.1|//PREDICTED: IgGFc-binding protein-like, partial [Gallus gallus]
107049720	820	31832	5816	-2.44055	0	Down	0	LOC107049720	NA	NA	NA	K02738//20S proteasome subunit beta 1 [EC:3.4.25.1]	gi|971448230|ref|XP_015129008.1|//PREDICTED: vitelline membrane outer layer protein 1 homolog [Gallus gallus]
430557	7375	7505.87	32399.7	2.12172	0	Up	0	ACACB	NA	GO:0003989//acetyl-CoA carboxylase activity;GO:0004075//biotin carboxylase activity	NA	K01946//acetyl-CoA carboxylase / biotin carboxylase 2 [EC:6.4.1.2 6.3.4.14]	gi|971421368|ref|XP_015130997.1|//PREDICTED: acetyl-CoA carboxylase 2 isoform X1 [Gallus gallus];gi|971421376|ref|XP_015131001.1|//PREDICTED: acetyl-CoA carboxylase 2 isoform X3 [Gallus gallus];gi|971421374|ref|XP_015131000.1|//PREDICTED: acetyl-CoA carboxylase 2 isoform X2 [Gallus gallus];gi|971421378|ref|XP_015131002.1|//PREDICTED: acetyl-CoA carboxylase 2 isoform X4 [Gallus gallus]
427836	2544	26825.3	5011.45	-2.40847	0	Down	0	FAM57A	NA	NA	NA	NA	gi|971426750|ref|XP_015151606.1|//PREDICTED: protein FAM57A [Gallus gallus]
423625	1198	43970	87516	1.00486	0	Up	0	FAM213A	GO:0016021//integral component of membrane;GO:0005737//cytoplasm	GO:0016209//antioxidant activity	GO:0098869//cellular oxidant detoxification;GO:0055114//oxidation-reduction process	K15717//prostamide/prostaglandin F2alpha synthase [EC:1.11.1.20]	gi|302058247|ref|NP_001180447.1|//redox-regulatory protein FAM213A [Gallus gallus]
395568	8274	68574	31272	-1.12096	0	Down	0	COL5A1	NA	NA	NA	K19721//collagen, type V/XI/XXIV/XXVII, alpha	gi|875725889|ref|NP_990121.2|//collagen alpha-1(V) chain precursor [Gallus gallus];gi|971422657|ref|XP_015134804.1|//PREDICTED: collagen alpha-1(V) chain isoform X1 [Gallus gallus]
416886	3952	3503	19941	2.5209	0	Up	0	RPH3A	GO:0005622//intracellular;GO:0098793//presynapse;GO:0005886//plasma membrane	GO:0005544//calcium-dependent phospholipid binding;GO:0030276//clathrin binding;GO:0005509//calcium ion binding;GO:0019905//syntaxin binding;GO:0017137//Rab GTPase binding	GO:0006886//intracellular protein transport;GO:0006906//vesicle fusion;GO:0048791//calcium ion-regulated exocytosis of neurotransmitter;GO:0017158//regulation of calcium ion-dependent exocytosis	K19938//rabphilin-3A	gi|971421435|ref|XP_004945663.2|//PREDICTED: rabphilin-3A isoform X3 [Gallus gallus];gi|971421437|ref|XP_004945664.2|//PREDICTED: rabphilin-3A isoform X4 [Gallus gallus];gi|971421433|ref|XP_015131024.1|//PREDICTED: rabphilin-3A isoform X2 [Gallus gallus];gi|513210307|ref|XP_004945666.1|//PREDICTED: rabphilin-3A isoform X5 [Gallus gallus]
419824	7861	38171	13101	-1.53097	0	Down	0	NFASC	GO:0070062//extracellular exosome;GO:0033270//paranode region of axon;GO:0005925//focal adhesion;GO:0016021//integral component of membrane;GO:0043209//myelin sheath;GO:0005886//plasma membrane;GO:0033010//paranodal junction	GO:0086080//protein binding involved in heterotypic cell-cell adhesion	GO:0019226//transmission of nerve impulse;GO:0071205//protein localization to juxtaparanode region of axon;GO:0045162//clustering of voltage-gated sodium channels;GO:0002175//protein localization to paranode region of axon;GO:0034113//heterotypic cell-cell adhesion;GO:0050808//synapse organization;GO:0007411//axon guidance;GO:0030913//paranodal junction assembly	K06757//neurofascin	gi|237858643|ref|NP_001153793.1|//neurofascin isoform 5 precursor [Gallus gallus];gi|971433661|ref|XP_015154394.1|//PREDICTED: neurofascin isoform X4 [Gallus gallus];gi|971433686|ref|XP_015154406.1|//PREDICTED: neurofascin isoform X16 [Gallus gallus];gi|971433673|ref|XP_015154400.1|//PREDICTED: neurofascin isoform X10 [Gallus gallus];gi|971433678|ref|XP_015154402.1|//PREDICTED: neurofascin isofor…
416235	1606	12481	630	-4.29641	0	Down	0	SPINK5	GO:0043234//protein complex;GO:0005576//extracellular region	GO:0002020//protease binding;GO:0004867//serine-type endopeptidase inhibitor activity;GO:0019870//potassium channel inhibitor activity	GO:0010951//negative regulation of endopeptidase activity	K06254//agrin	gi|762068625|ref|NP_001025783.2|//ovoinhibitor precursor [Gallus gallus];gi|971417773|ref|XP_015149248.1|//PREDICTED: ovoinhibitor isoform X1 [Gallus gallus]
419933	3296	53202	22723	-1.2155	0	Down	0	PRELP	NA	NA	NA	K08125//proline arginine-rich end leucine-rich repeat protein	gi|118102574|ref|XP_418054.2|//PREDICTED: prolargin [Gallus gallus]
424366	3056	34711	11365.4	-1.59892	0	Down	0	OLFML2B	NA	NA	NA	K04594//latrophilin 3	gi|971407248|ref|XP_422209.5|//PREDICTED: olfactomedin-like protein 2B [Gallus gallus]
417520	3003	27357.4	7299.32	-1.89427	0	Down	0	POR	GO:0043231//intracellular membrane-bounded organelle;GO:0016021//integral component of membrane	GO:0003958//NADPH-hemoprotein reductase activity;GO:0010181//FMN binding	GO:0032770//positive regulation of monooxygenase activity;GO:0055114//oxidation-reduction process;GO:0090346//cellular organofluorine metabolic process	K00327//NADPH-ferrihemoprotein reductase [EC:1.6.2.4]	gi|971425748|ref|XP_015151205.1|//PREDICTED: NADPH--cytochrome P450 reductase isoform X2 [Gallus gallus];gi|307775405|ref|NP_001182725.1|//NADPH--cytochrome P450 reductase [Gallus gallus]
429035	1613	49924	21065	-1.23305	0	Down	0	TUBA1C	GO:0070062//extracellular exosome;GO:0005634//nucleus;GO:0005829//cytosol;GO:0005881//cytoplasmic microtubule;GO:0043209//myelin sheath;GO:0036464//cytoplasmic ribonucleoprotein granule;GO:0055037//recycling endosome	GO:0019904//protein domain specific binding;GO:0046982//protein heterodimerization activity;GO:0005200//structural constituent of cytoskeleton;GO:0005525//GTP binding;GO:0003924//GTPase activity	GO:0021634//optic nerve formation;GO:0051301//cell division;GO:0007010//cytoskeleton organization;GO:0000086//G2/M transition of mitotic cell cycle;GO:0007017//microtubule-based process;GO:0043066//negative regulation of apoptotic process;GO:0030705//cytoskeleton-dependent intracellular transport	K07374//tubulin alpha	gi|765365496|ref|NP_001292201.1|//tubulin alpha-1 chain [Gallus gallus]
100857753	1228	61899.6	29259.2	-1.06921	0	Down	0	ABHD12B	NA	NA	NA	K13704//abhydrolase domain-containing protein 12 [EC:3.1.1.23]	gi|363735032|ref|XP_003641499.1|//PREDICTED: abhydrolase domain-containing protein 12B [Gallus gallus]
420057	3618	16639	2859	-2.52916	0	Down	0	SLC1A6	NA	NA	NA	K05617//solute carrier family 1 (high affinity aspartate/glutamate transporter), member 6	gi|513226492|ref|XP_004948712.1|//PREDICTED: excitatory amino acid transporter 4 isoform X1 [Gallus gallus]
414343	693	9653	172	-5.79867	0	Down	0	AvBD9	GO:0005576//extracellular region	NA	GO:0050832//defense response to fungus;GO:0050829//defense response to Gram-negative bacterium;GO:0031640//killing of cells of other organism	NA	gi|48675889|ref|NP_001001611.1|//gallinacin-9 preproprotein [Gallus gallus]
395074	4210	40020	16129	-1.29923	0	Down	0	CCDC80	GO:0005614//interstitial matrix;GO:0005604//basement membrane	GO:0001968//fibronectin binding;GO:0008201//heparin binding	GO:0001525//angiogenesis;GO:0030198//extracellular matrix organization;GO:0048870//cell motility;GO:0010811//positive regulation of cell-substrate adhesion	K19408//sushi repeat-containing protein SRPX2	gi|45383303|ref|NP_989762.1|//coiled-coil domain-containing protein 80 precursor [Gallus gallus]
423122	4497	25998	7841	-1.71746	0	Down	0	FADS2	GO:0016021//integral component of membrane	GO:0016491//oxidoreductase activity	GO:0055114//oxidation-reduction process;GO:0006629//lipid metabolic process	K10226//acyl-CoA 6-desaturase (Delta-6 desaturase) [EC:1.14.19.3]	gi|238028975|ref|NP_001153900.1|//fatty acid desaturase 2 [Gallus gallus]
427308	1590	25217	7468	-1.74377	0	Down	0	ALDOB	GO:0070062//extracellular exosome;GO:0005829//cytosol;GO:0034451//centriolar satellite	GO:0061609//fructose-1-phosphate aldolase activity;GO:0070061//fructose binding;GO:0004332//fructose-bisphosphate aldolase activity;GO:0008092//cytoskeletal protein binding;GO:0042802//identical protein binding;GO:0051117//ATPase binding	GO:0001889//liver development;GO:0006000//fructose metabolic process;GO:0006094//gluconeogenesis;GO:0006096//glycolytic process;GO:0006116//NADH oxidation;GO:0070072//vacuolar proton-transporting V-type ATPase complex assembly;GO:0032781//positive regulation of ATPase activity;GO:0030388//fructose 1,6-bisphosphate metabolic process	K01623//fructose-bisphosphate aldolase, class I [EC:4.1.2.13]	gi|157951672|ref|NP_001007978.1|//fructose-bisphosphate aldolase B [Gallus gallus]
420570	3777	14841	36401	1.30622	0	Up	0	PDK4	NA	NA	NA	K00898//pyruvate dehydrogenase kinase 2/3/4 [EC:2.7.11.2]	gi|315573167|ref|NP_001186838.1|//pyruvate dehydrogenase kinase, isozyme 4 [Gallus gallus]
422277	3131	51341	24471	-1.05721	0	Down	0	SH3BGRL	NA	NA	NA	K13912//deleted in malignant brain tumors 1 protein	gi|60302796|ref|NP_001012592.1|//SH3 domain-binding glutamic acid-rich-like protein [Gallus gallus]
419557	402	51360	25168	-1.01722	0	Down	0	FABP3	GO:0070062//extracellular exosome;GO:0005615//extracellular space	GO:0008092//cytoskeletal protein binding;GO:0070538//oleic acid binding;GO:0005215//transporter activity	GO:0006810//transport	K08752//fatty acid-binding protein 3, muscle and heart	gi|71894843|ref|NP_001026060.1|//fatty acid-binding protein, heart [Gallus gallus]
100858068	791	2801	14534	2.38725	0	Up	0	LOC100858068	NA	NA	NA	K18273//alpha-tectorin	gi|971442314|ref|XP_015156645.1|//PREDICTED: IgGFc-binding protein-like, partial [Gallus gallus]
100859797	6499	17613	4212	-2.05223	0	Down	0	ACKR4	NA	NA	NA	K04186//C-C chemokine receptor-like 1	gi|513169317|ref|XP_003640769.2|//PREDICTED: atypical chemokine receptor 4 [Gallus gallus]
419017	3381	49909	24540	-1.01233	0	Down	0	PRSS23	GO:0070062//extracellular exosome;GO:0005634//nucleus	GO:0004252//serine-type endopeptidase activity	GO:0006508//proteolysis	K09627//serine protease 23 [EC:3.4.21.-]	gi|363729395|ref|XP_001234471.2|//PREDICTED: serine protease 23 [Gallus gallus]
374117	1889	8784.52	551.82	-3.98086	0	Down	0	IGJ	GO:0070062//extracellular exosome;GO:0071756//pentameric IgM immunoglobulin complex;GO:0072562//blood microparticle;GO:0071748//monomeric IgA immunoglobulin complex;GO:0071752//secretory dimeric IgA immunoglobulin complex	GO:0003697//single-stranded DNA binding;GO:0031210//phosphatidylcholine binding;GO:0034987//immunoglobulin receptor binding;GO:0019862//IgA binding;GO:0042834//peptidoglycan binding;GO:0042803//protein homodimerization activity	GO:0032461//positive regulation of protein oligomerization;GO:0003094//glomerular filtration;GO:0060267//positive regulation of respiratory burst;GO:0001895//retina homeostasis;GO:0019731//antibacterial humoral response;GO:0045087//innate immune response;GO:0002250//adaptive immune response	NA	gi|46049078|ref|NP_989594.1|//immunoglobulin J chain precursor [Gallus gallus]
419950	5441	33891	14084	-1.25501	0	Down	0	MRC2	NA	NA	NA	K06560//mannose receptor, C type	gi|971434914|ref|XP_015154875.1|//PREDICTED: C-type mannose receptor 2 [Gallus gallus]
418489	3097	16029	3663	-2.11776	0	Down	0	GRIK1	NA	NA	NA	K05201//glutamate receptor, ionotropic kainate 1	gi|971375237|ref|XP_015155113.1|//PREDICTED: glutamate receptor ionotropic, kainate 1 isoform X3 [Gallus gallus];gi|971375233|ref|XP_015155100.1|//PREDICTED: glutamate receptor ionotropic, kainate 1 isoform X1 [Gallus gallus];gi|971375235|ref|XP_015155106.1|//PREDICTED: glutamate receptor ionotropic, kainate 1 isoform X2 [Gallus gallus]
416292	4500	781	8970	3.53354	0	Up	0	C10ORF10	NA	NA	NA	K08618//a disintegrin and metalloproteinase with thrombospondin motifs 2 [EC:3.4.24.14]	gi|118097493|ref|XP_429413.2|//PREDICTED: uncharacterized protein C10ORF10 isoform X1 [Gallus gallus]
395267	1882	6821	21259	1.65185	0	Up	0	FMO3	GO:0031090//organelle membrane;GO:0016021//integral component of membrane;GO:0005789//endoplasmic reticulum membrane	GO:0050661//NADP binding;GO:0004499//N,N-dimethylaniline monooxygenase activity;GO:0050660//flavin adenine dinucleotide binding	GO:0055114//oxidation-reduction process	K00485//dimethylaniline monooxygenase (N-oxide forming) [EC:1.14.13.8]	gi|45383027|ref|NP_989910.1|//flavin-containing monooxygenase 3 [Gallus gallus]
421589	6530	36913	16659	-1.136	0	Down	0	FNDC1	NA	NA	NA	K06765//deleted in colorectal carcinoma;K06766//neogenin	gi|971388437|ref|XP_015139799.1|//PREDICTED: fibronectin type III domain-containing protein 1 [Gallus gallus]
419733	5012	23981.6	8767.9	-1.43979	0	Down	0	ADAMTS15	NA	NA	NA	K08629//a disintegrin and metalloproteinase with thrombospondin motifs 15 [EC:3.4.24.-]	gi|118101877|ref|XP_417874.2|//PREDICTED: A disintegrin and metalloproteinase with thrombospondin motifs 15 [Gallus gallus]
418193	8463	3943	15246	1.9629	0	Up	0	BCAT1	NA	NA	NA	K00826//branched-chain amino acid aminotransferase [EC:2.6.1.42]	gi|50729086|ref|XP_416424.1|//PREDICTED: branched-chain-amino-acid aminotransferase, cytosolic [Gallus gallus]
417187	4656	16424	35036	1.10486	0	Up	0	FNBP1	NA	NA	NA	K20121//formin-binding protein 1	gi|971423597|ref|XP_015135212.1|//PREDICTED: formin-binding protein 1 isoform X8 [Gallus gallus];gi|971423593|ref|XP_015135210.1|//PREDICTED: formin-binding protein 1 isoform X6 [Gallus gallus];gi|971423605|ref|XP_015135216.1|//PREDICTED: formin-binding protein 1 isoform X12 [Gallus gallus];gi|971423603|ref|XP_015135215.1|//PREDICTED: formin-binding protein 1 isoform X11 [Gallus gallus];gi|971423…
100857892	1126	9970	25063	1.34172	0	Up	0	LOC100857892	NA	NA	GO:0007160//cell-matrix adhesion	K18273//alpha-tectorin	gi|513236346|ref|XP_004950259.1|//PREDICTED: sushi, nidogen and EGF-like domain-containing protein 1 isoform X2 [Gallus gallus];gi|513236349|ref|XP_004950260.1|//PREDICTED: sushi, nidogen and EGF-like domain-containing protein 1 isoform X1 [Gallus gallus]
427338	13633	12448	28852	1.22459	0	Up	0	SVEP1	NA	NA	NA	K17495//CUB and sushi domain-containing protein	gi|971440354|ref|XP_015136185.1|//PREDICTED: sushi, von Willebrand factor type A, EGF and pentraxin domain-containing protein 1 [Gallus gallus]
396441	3020	23284	8852	-1.38343	0	Down	0	ELN	GO:0071953//elastic fiber;GO:0005739//mitochondrion;GO:0005578//proteinaceous extracellular matrix	GO:0005201//extracellular matrix structural constituent;GO:0050840//extracellular matrix binding	GO:0030833//regulation of actin filament polymerization;GO:0030198//extracellular matrix organization;GO:0007519//skeletal muscle tissue development;GO:0043149//stress fiber assembly	K14211//elastin	gi|641738637|ref|NP_001280036.1|//elastin precursor [Gallus gallus]
396432	3245	19052	37965	1.00656	0	Up	0	TGM2	GO:0070062//extracellular exosome;GO:0005783//endoplasmic reticulum;GO:0031226//intrinsic component of plasma membrane;GO:0005925//focal adhesion;GO:0005829//cytosol;GO:0005739//mitochondrion	GO:0046872//metal ion binding;GO:0003810//protein-glutamine gamma-glutamyltransferase activity	GO:0060445//branching involved in salivary gland morphogenesis;GO:0045785//positive regulation of cell adhesion;GO:0032471//negative regulation of endoplasmic reticulum calcium ion concentration;GO:0043277//apoptotic cell clearance;GO:0051561//positive regulation of mitochondrial calcium ion concentration;GO:0018149//peptide cross-linking;GO:0043065//positive regulation of apoptotic process;GO:00…	K05625//transglutaminase 2 [EC:2.3.2.13]	gi|45382075|ref|NP_990779.1|//protein-glutamine gamma-glutamyltransferase 2 [Gallus gallus]
427187	3798	10109	24737	1.30286	0	Up	0	C7	GO:0070062//extracellular exosome;GO:0005579//membrane attack complex	NA	GO:0006955//immune response	K03996//complement component 7	gi|971825815|ref|NP_001305331.1|//complement component C7 precursor [Gallus gallus]
417341	4965	2065	10656	2.37928	0	Up	0	NARF	GO:0005638//lamin filament	GO:0005521//lamin binding	NA	NA	gi|363740787|ref|XP_415606.3|//PREDICTED: nuclear prelamin A recognition factor [Gallus gallus]
421945	6346	6797	19288	1.51656	0	Up	0	LPIN1	GO:0005634//nucleus;GO:0005741//mitochondrial outer membrane	GO:0003713//transcription coactivator activity;GO:0008195//phosphatidate phosphatase activity	GO:0045944//positive regulation of transcription from RNA polymerase II promoter;GO:0009062//fatty acid catabolic process;GO:0016311//dephosphorylation;GO:0019432//triglyceride biosynthetic process	K15728//phosphatidate phosphatase LPIN [EC:3.1.3.4]	gi|513178989|ref|XP_004935828.1|//PREDICTED: phosphatidate phosphatase LPIN1 isoform X2 [Gallus gallus];gi|513178998|ref|XP_004935830.1|//PREDICTED: phosphatidate phosphatase LPIN1 isoform X5 [Gallus gallus];gi|513178992|ref|XP_419957.4|//PREDICTED: phosphatidate phosphatase LPIN1 isoform X3 [Gallus gallus];gi|971390339|ref|XP_015131579.1|//PREDICTED: phosphatidate phosphatase LPIN1 isoform X6 [G…
408044	6304	24485	10385	-1.22557	0	Down	0	PPL	NA	NA	NA	K10386//periplakin	gi|363739654|ref|XP_414712.3|//PREDICTED: periplakin [Gallus gallus]
107055521	716	2293.54	10343.3	2.18488	0	Up	0	LOC107055521	NA	NA	NA	NA	gi|971441183|ref|XP_015156161.1|//PREDICTED: uncharacterized protein LOC107055521 [Gallus gallus]
396307	3068	6020	477	-3.64587	0	Down	0	FGA	GO:0070062//extracellular exosome;GO:0005577//fibrinogen complex;GO:0072562//blood microparticle;GO:0005938//cell cortex;GO:0009897//external side of plasma membrane;GO:0031091//platelet alpha granule	GO:0046872//metal ion binding;GO:0050839//cell adhesion molecule binding;GO:0030674//protein binding, bridging;GO:0005102//receptor binding;GO:0005198//structural molecule activity	GO:0045921//positive regulation of exocytosis;GO:0072377//blood coagulation, common pathway;GO:0045907//positive regulation of vasoconstriction;GO:0043152//induction of bacterial agglutination;GO:1902042//negative regulation of extrinsic apoptotic signaling pathway via death domain receptors;GO:0090277//positive regulation of peptide hormone secretion;GO:0042730//fibrinolysis;GO:0034116//positive…	K03903//fibrinogen alpha chain	gi|429484490|ref|NP_001258840.1|//fibrinogen alpha chain isoform 1 precursor [Gallus gallus];gi|429484492|ref|NP_990687.2|//fibrinogen alpha chain isoform 2 precursor [Gallus gallus]
415954	2476	16200	5567	-1.52919	0	Down	0	ASPN	NA	NA	NA	K08120//asporin	gi|118096781|ref|XP_414298.2|//PREDICTED: asporin [Gallus gallus]
396212	376	4450	14077	1.67329	0	Up	0	MT4	NA	GO:0008270//zinc ion binding	GO:0070555//response to interleukin-1;GO:0032496//response to lipopolysaccharide	K14739//metallothionein 1/2	gi|46048711|ref|NP_990606.1|//metallothionein [Gallus gallus]
100859304	2386	4929.49	107.04	-5.51339	0	Down	0	LOC100859304	NA	NA	NA	K19364//magnesium transporter NIPA1	gi|30313561|gb|AAN38982.1|//envelope protein [Gallus gallus]
419076	1449	7924	1405	-2.48383	0	Down	0	HPX	NA	NA	NA	K18977//hemopexin [EC:3.2.1.35]	gi|971378941|ref|XP_015136422.1|//PREDICTED: hemopexin [Gallus gallus]
100858647	598	15951	5774	-1.45417	0	Down	0	LOC100858647	NA	NA	NA	NA	gi|363735454|ref|XP_003641562.1|//PREDICTED: beta-microseminoprotein-like [Gallus gallus]
100859737	1648	24985.5	11805.9	-1.06975	0	Down	0	LOC100859737	GO:0070062//extracellular exosome;GO:0005881//cytoplasmic microtubule;GO:0043209//myelin sheath;GO:0030496//midbody	GO:0031625//ubiquitin protein ligase binding;GO:0005200//structural constituent of cytoskeleton;GO:0005525//GTP binding;GO:0003725//double-stranded RNA binding;GO:0003924//GTPase activity	GO:0000226//microtubule cytoskeleton organization;GO:0051301//cell division;GO:0071353//cellular response to interleukin-4;GO:0030705//cytoskeleton-dependent intracellular transport	K07374//tubulin alpha	gi|34740335|ref|NP_035784.1|//tubulin alpha-1B chain [Mus musculus]
373926	1839	4968	341	-3.85299	0	Down	0	FGB	GO:0070062//extracellular exosome;GO:0005577//fibrinogen complex;GO:0072562//blood microparticle;GO:0005938//cell cortex;GO:0009897//external side of plasma membrane;GO:0031091//platelet alpha granule	GO:0046872//metal ion binding;GO:0050839//cell adhesion molecule binding;GO:0030674//protein binding, bridging;GO:0005102//receptor binding;GO:0005198//structural molecule activity;GO:0051087//chaperone binding	GO:0045921//positive regulation of exocytosis;GO:0045907//positive regulation of vasoconstriction;GO:0043152//induction of bacterial agglutination;GO:1902042//negative regulation of extrinsic apoptotic signaling pathway via death domain receptors;GO:0072378//blood coagulation, fibrin clot formation;GO:0090277//positive regulation of peptide hormone secretion;GO:0042730//fibrinolysis;GO:0034116//p…	K03904//fibrinogen beta chain	gi|267844833|ref|NP_001161155.1|//fibrinogen beta chain precursor [Gallus gallus]
418451	6319	27008.9	13352.3	-1.00451	0	Down	0	IGSF3	NA	NA	NA	K06522//immunoglobulin superfamily, member 2/3	gi|971374949|ref|XP_015153711.1|//PREDICTED: immunoglobulin superfamily member 3 isoform X1 [Gallus gallus];gi|971374951|ref|XP_015153719.1|//PREDICTED: immunoglobulin superfamily member 3 isoform X2 [Gallus gallus]
396061	10642	25715	12467	-1.03267	0	Down	0	FASN	GO:0070062//extracellular exosome;GO:0005794//Golgi apparatus;GO:0042587//glycogen granule;GO:0005739//mitochondrion;GO:0005886//plasma membrane	GO:0004317//3-hydroxypalmitoyl-[acyl-carrier-protein] dehydratase activity;GO:0004320//oleoyl-[acyl-carrier-protein] hydrolase activity;GO:0031177//phosphopantetheine binding;GO:0004313//[acyl-carrier-protein] S-acetyltransferase activity;GO:0004319//enoyl-[acyl-carrier-protein] reductase (NADPH, B-specific) activity;GO:0016296//palmitoyl-[acyl-carrier-protein] hydrolase activity;GO:0047451//3-hy…	GO:0001649//osteoblast differentiation;GO:0002943//tRNA dihydrouridine synthesis;GO:0006089//lactate metabolic process;GO:0006633//fatty acid biosynthetic process;GO:0071353//cellular response to interleukin-4;GO:0055114//oxidation-reduction process;GO:0032100//positive regulation of appetite	K00665//fatty acid synthase, animal type [EC:2.3.1.85]	gi|319655768|ref|NP_990486.2|//fatty acid synthase [Gallus gallus]
424956	1417	4531	208	-4.43334	0	Down	0	AHSG	NA	NA	NA	K03898//kininogen	gi|50752381|ref|XP_422764.1|//PREDICTED: alpha-2-HS-glycoprotein [Gallus gallus]
418479	4139	16669	6488	-1.34949	0	Down	0	ADAMTS1	NA	NA	NA	K08617//a disintegrin and metalloproteinase with thrombospondin motifs 1 [EC:3.4.24.-]	gi|971375149|ref|XP_015154663.1|//PREDICTED: A disintegrin and metalloproteinase with thrombospondin motifs 1 [Gallus gallus]
373931	2499	25173	12156	-1.03838	0	Down	0	EGR1	GO:0005654//nucleoplasm;GO:0005737//cytoplasm	GO:0046872//metal ion binding;GO:0000977//RNA polymerase II regulatory region sequence-specific DNA binding;GO:0001077//transcriptional activator activity, RNA polymerase II core promoter proximal region sequence-specific binding;GO:0035035//histone acetyltransferase binding	GO:0032868//response to insulin;GO:0030509//BMP signaling pathway;GO:0070498//interleukin-1-mediated signaling pathway;GO:0071480//cellular response to gamma radiation;GO:0000122//negative regulation of transcription from RNA polymerase II promoter;GO:0090090//negative regulation of canonical Wnt signaling pathway;GO:0033233//regulation of protein sumoylation;GO:0035914//skeletal muscle cell diff…	K09203//early growth response protein 1	gi|148540084|ref|NP_989467.2|//early growth response protein 1 [Gallus gallus]
769420	3412	14700	5390	-1.43563	0	Down	0	PRKAR2B	NA	NA	NA	K04739//cAMP-dependent protein kinase regulator	gi|971370532|ref|XP_015131274.1|//PREDICTED: cAMP-dependent protein kinase type II-beta regulatory subunit isoform X2 [Gallus gallus];gi|971370530|ref|XP_015131273.1|//PREDICTED: cAMP-dependent protein kinase type II-beta regulatory subunit isoform X1 [Gallus gallus]
772356	4161	7795	18217	1.23649	0	Up	0	CADM3	NA	NA	NA	K06780//cell adhesion molecule 3	gi|971432973|ref|XP_015154156.1|//PREDICTED: cell adhesion molecule 3 isoform X1 [Gallus gallus];gi|971432977|ref|XP_015154158.1|//PREDICTED: cell adhesion molecule 3 isoform X2 [Gallus gallus];gi|971432981|ref|XP_015154160.1|//PREDICTED: cell adhesion molecule 3 isoform X4 [Gallus gallus];gi|971432979|ref|XP_015154159.1|//PREDICTED: cell adhesion molecule 3 isoform X3 [Gallus gallus]
422022	5936	19724	8635	-1.17985	0	Down	0	EXTL3	GO:0005783//endoplasmic reticulum;GO:0016021//integral component of membrane	GO:0008375//acetylglucosaminyltransferase activity	GO:0015012//heparan sulfate proteoglycan biosynthetic process;GO:0006024//glycosaminoglycan biosynthetic process	K02370//alpha-1,4-N-acetylglucosaminyltransferase EXTL3 [EC:2.4.1.223 2.4.1.224]	gi|118089116|ref|XP_420030.2|//PREDICTED: exostosin-like 3 [Gallus gallus]
395837	1594	4289	229	-4.21539	0	Down	0	FGG	GO:0005577//fibrinogen complex	GO:0046872//metal ion binding;GO:0030674//protein binding, bridging;GO:0005102//receptor binding	GO:0051258//protein polymerization;GO:0007165//signal transduction;GO:0030168//platelet activation	K03905//fibrinogen gamma chain	gi|766944255|ref|NP_990320.2|//fibrinogen gamma chain precursor [Gallus gallus]
101749846	1833	6172.78	943.73	-2.69764	0	Down	0	LOC101749846	NA	NA	NA	K17853//cytochrome P450 family 2 subfamily H;K07417//cytochrome P450 family 2 subfamily G;K07412//cytochrome P450 family 2 subfamily B [EC:1.14.14.1]	gi|971449408|ref|XP_015129467.1|//PREDICTED: cytochrome P450 2F5-like [Gallus gallus]
396370	5026	10578.7	3356.48	-1.64431	0	Down	0	C3	GO:0070062//extracellular exosome;GO:0072562//blood microparticle	GO:0004252//serine-type endopeptidase activity;GO:0004866//endopeptidase inhibitor activity;GO:0031715//C5L2 anaphylatoxin chemotactic receptor binding	GO:0010951//negative regulation of endopeptidase activity;GO:0010575//positive regulation of vascular endothelial growth factor production;GO:0006957//complement activation, alternative pathway;GO:0010884//positive regulation of lipid storage;GO:0010828//positive regulation of glucose transport;GO:0001970//positive regulation of activation of membrane attack complex;GO:0045745//positive regulatio…	K03990//complement component 3	gi|45382303|ref|NP_990736.1|//complement C3 precursor [Gallus gallus]
100859721	413	4234	320	-3.71405	0	Down	0	APOC3	NA	NA	NA	K08759//apolipoprotein C-III	gi|693073388|ref|NP_001289056.1|//apolipoprotein C-III precursor [Gallus gallus]
424014	1242	2555.46	9006.05	1.82914	0	Up	0	LOC424014	NA	GO:0008168//methyltransferase activity	GO:0032259//methylation	K08143//MFS transporter, SP family, solute carrier family 2 (facilitated glucose/fructose transporter), member 5;K18162//NADH dehydrogenase [ubiquinone] 1 alpha subcomplex assembly factor 5 [EC:2.1.1.-]	gi|118093267|ref|XP_001232694.1|//PREDICTED: putative methyltransferase DDB_G0268948 [Gallus gallus]
770690	6450	7472	1721	-2.10642	0	Down	0	PODXL2	NA	NA	NA	K06818//podocalyxin-like 2	gi|971416789|ref|XP_001234026.4|//PREDICTED: podocalyxin-like protein 2 [Gallus gallus]
100858842	534	4346	390	-3.46631	0	Down	0	APOA2	NA	NA	NA	K08758//apolipoprotein A-II	gi|971445460|ref|XP_003643462.2|//PREDICTED: apolipoprotein A-II [Gallus gallus]
101749287	2639	7398	1720	-2.0929	0	Down	0	LOC101749287	NA	NA	NA	K21068//MICAL-like protein 2;K19948//MICAL-like protein 1	gi|513234927|ref|XP_004950019.1|//PREDICTED: uncharacterized protein C16orf45 homolog isoform X2 [Gallus gallus];gi|513234924|ref|XP_004950018.1|//PREDICTED: uncharacterized protein C16orf45 homolog isoform X1 [Gallus gallus]
768688	3674	3463	104	-5.04554	0	Down	0	SMOC1	NA	NA	NA	K10809//thyroglobulin	gi|513187736|ref|XP_004941745.1|//PREDICTED: SPARC-related modular calcium-binding protein 1 isoform X2 [Gallus gallus];gi|971399543|ref|XP_015143068.1|//PREDICTED: SPARC-related modular calcium-binding protein 1 isoform X3 [Gallus gallus];gi|513187734|ref|XP_001231761.2|//PREDICTED: SPARC-related modular calcium-binding protein 1 isoform X1 [Gallus gallus]
396506	364	19045	8931	-1.08069	0	Down	0	S100A10	GO:0070062//extracellular exosome;GO:0045121//membrane raft;GO:0016021//integral component of membrane;GO:0019897//extrinsic component of plasma membrane	GO:0044325//ion channel binding;GO:0005509//calcium ion binding;GO:0042803//protein homodimerization activity	GO:0051496//positive regulation of stress fiber assembly;GO:0051894//positive regulation of focal adhesion assembly;GO:0001765//membrane raft assembly;GO:0043547//positive regulation of GTPase activity;GO:0051099//positive regulation of binding;GO:0051290//protein heterotetramerization;GO:0006900//vesicle budding from membrane;GO:1900026//positive regulation of substrate adhesion-dependent cell s…	K17274//calpactin-1 light chain	gi|45382861|ref|NP_990837.1|//protein S100-A10 [Gallus gallus]
417317	2637	5347.77	13420	1.33921	0	Up	0	NDEL1	GO:0031252//cell leading edge;GO:1904115//axon cytoplasm;GO:0005874//microtubule;GO:0008021//synaptic vesicle;GO:0043203//axon hillock;GO:0005813//centrosome;GO:0005819//spindle;GO:0000776//kinetochore;GO:0060053//neurofilament cytoskeleton;GO:0005871//kinesin complex	GO:0048487//beta-tubulin binding;GO:0043014//alpha-tubulin binding;GO:0008017//microtubule binding	GO:0000132//establishment of mitotic spindle orientation;GO:0021799//cerebral cortex radially oriented cell migration;GO:0021955//central nervous system neuron axonogenesis;GO:0090630//activation of GTPase activity;GO:0007059//chromosome segregation;GO:0051303//establishment of chromosome localization;GO:0007020//microtubule nucleation;GO:0007100//mitotic centrosome separation;GO:0051642//centros…	K16739//nuclear distribution protein NudE-like 1	gi|971424288|ref|XP_015150729.1|//PREDICTED: LOW QUALITY PROTEIN: nuclear distribution protein nudE-like 1 [Gallus gallus]
418649	5763	7566.04	16747.8	1.15819	0	Up	0	WWC3	NA	NA	NA	K16685//protein KIBRA	gi|971376284|ref|XP_015129232.1|//PREDICTED: protein WWC3 isoform X1 [Gallus gallus];gi|971376286|ref|XP_015129238.1|//PREDICTED: protein WWC3 isoform X2 [Gallus gallus];gi|971376288|ref|XP_015129242.1|//PREDICTED: protein WWC3 isoform X3 [Gallus gallus]
395734	2350	19201	9078	-1.0689	0	Down	0	RHOB	GO:0010008//endosome membrane;GO:0070062//extracellular exosome;GO:0005634//nucleus;GO:0005770//late endosome;GO:0005925//focal adhesion;GO:0032154//cleavage furrow;GO:0005769//early endosome;GO:0005886//plasma membrane	GO:0019003//GDP binding;GO:0005525//GTP binding	GO:0045786//negative regulation of cell cycle;GO:0000910//cytokinesis;GO:0010595//positive regulation of endothelial cell migration;GO:0030336//negative regulation of cell migration;GO:0006886//intracellular protein transport;GO:0007155//cell adhesion;GO:0043065//positive regulation of apoptotic process;GO:0061154//endothelial tube morphogenesis;GO:0007264//small GTPase mediated signal transducti…	K07856//Ras homolog gene family, member B	gi|45382499|ref|NP_990240.1|//rho-related GTP-binding protein RhoB [Gallus gallus]
107049379	2283	85.72	3352.12	5.30113	0	Up	0	LOC107049379	NA	NA	NA	K14165//atypical dual specificity phosphatase [EC:3.1.3.16 3.1.3.48];K04257//olfactory receptor	gi|971441037|ref|XP_015156091.1|//PREDICTED: uncharacterized protein LOC101749724 isoform X1 [Gallus gallus];gi|971441049|ref|XP_015156096.1|//PREDICTED: coiled-coil domain-containing protein 81-like isoform X6 [Gallus gallus];gi|971441039|ref|XP_015156092.1|//PREDICTED: uncharacterized protein LOC101749724 isoform X2 [Gallus gallus];gi|971446629|ref|XP_015128313.1|//PREDICTED: coiled-coil domain…
419180	1023	12125	4551	-1.4019	0	Down	0	DBNDD2	NA	NA	NA	K20189//dysbindin	gi|118100525|ref|XP_417359.2|//PREDICTED: dysbindin domain-containing protein 2 isoform X1 [Gallus gallus];gi|971428410|ref|XP_015152224.1|//PREDICTED: dysbindin domain-containing protein 2 isoform X2 [Gallus gallus];gi|971428412|ref|XP_015152225.1|//PREDICTED: dysbindin domain-containing protein 2 isoform X3 [Gallus gallus]
417540	861	4430	528	-3.05687	0	Down	0	PSPH	NA	GO:0000287//magnesium ion binding;GO:0004647//phosphoserine phosphatase activity;GO:0005509//calcium ion binding;GO:0042803//protein homodimerization activity	GO:0006564//L-serine biosynthetic process;GO:0016311//dephosphorylation	K01079//phosphoserine phosphatase [EC:3.1.3.3]	gi|971425766|ref|XP_015151216.1|//PREDICTED: phosphoserine phosphatase isoform X1 [Gallus gallus];gi|514707717|ref|XP_005010718.1|//PREDICTED: phosphoserine phosphatase isoform X1 [Anas platyrhynchos]
416745	3200	4467	11708	1.40195	0	Up	0	ADCK3	NA	NA	NA	K08869//aarF domain-containing kinase	gi|313661454|ref|NP_001186342.1|//atypical kinase ADCK3, mitochondrial [Gallus gallus]
395935	1620	5962.55	1197.01	-2.30466	0	Down	0	VTN	GO:0070062//extracellular exosome;GO:0072562//blood microparticle;GO:0005578//proteinaceous extracellular matrix	GO:0005044//scavenger receptor activity;GO:0005178//integrin binding;GO:0030247//polysaccharide binding;GO:0050840//extracellular matrix binding	GO:0050731//positive regulation of peptidyl-tyrosine phosphorylation;GO:0010951//negative regulation of endopeptidase activity;GO:0048709//oligodendrocyte differentiation;GO:0035987//endodermal cell differentiation;GO:0033627//cell adhesion mediated by integrin;GO:0032092//positive regulation of protein binding;GO:0061302//smooth muscle cell-matrix adhesion;GO:0030198//extracellular matrix organi…	K06251//vitronectin	gi|46048795|ref|NP_990392.1|//vitronectin precursor [Gallus gallus]
423678	3624	4909.79	12187	1.32344	0	Up	0	PAPSS2	NA	NA	NA	K13811//3'-phosphoadenosine 5'-phosphosulfate synthase [EC:2.7.7.4 2.7.1.25]	gi|513190554|ref|XP_004942049.1|//PREDICTED: bifunctional 3'-phosphoadenosine 5'-phosphosulfate synthase 2 isoform X3 [Gallus gallus];gi|971401463|ref|XP_015134188.1|//PREDICTED: bifunctional 3'-phosphoadenosine 5'-phosphosulfate synthase 2 isoform X1 [Gallus gallus];gi|971401465|ref|XP_015134189.1|//PREDICTED: bifunctional 3'-phosphoadenosine 5'-phosphosulfate synthase 2 isoform X2 [Gallus gallu…
414798	1506	13007	5446	-1.24419	0	Down	0	CYB5A	GO:0070062//extracellular exosome;GO:0031090//organelle membrane;GO:0016021//integral component of membrane;GO:0005739//mitochondrion;GO:0005789//endoplasmic reticulum membrane	GO:0020037//heme binding;GO:0046872//metal ion binding;GO:0019899//enzyme binding	GO:0055114//oxidation-reduction process	K10226//acyl-CoA 6-desaturase (Delta-6 desaturase) [EC:1.14.19.3];K10595//E3 ubiquitin-protein ligase HERC2 [EC:2.3.2.26];K19703//4-hydroxysphinganine ceramide fatty acyl 2-hydroxylase [EC:1.14.18.6]	gi|48976095|ref|NP_001001748.1|//cytochrome b5 [Gallus gallus]
427166	3579	13951	6088	-1.1845	0	Down	0	SGTB	NA	NA	NA	K16365//small glutamine-rich tetratricopeptide repeat-containing protein alpha	gi|71894775|ref|NP_001026589.1|//small glutamine-rich tetratricopeptide repeat-containing protein beta [Gallus gallus]
423825	7352	5992	13504	1.18411	0	Up	0	GPR123	NA	NA	NA	K08462//G protein-coupled receptor 125;K08460//G protein-coupled receptor 123	gi|513191452|ref|XP_421695.4|//PREDICTED: adhesion G protein-coupled receptor A3 [Gallus gallus]
395345	512	2924	113	-4.68172	0	Down	0	LBFABP	GO:0005737//cytoplasm	GO:0005504//fatty acid binding;GO:0005215//transporter activity	GO:0006810//transport	K08755//fatty acid-binding protein 6, ileal (gastrotropin)	gi|45382869|ref|NP_989965.1|//fatty acid-binding protein, liver [Gallus gallus]
416852	1689	4372	654	-2.7291	0	Down	0	HPD	NA	NA	NA	K00457//4-hydroxyphenylpyruvate dioxygenase [EC:1.13.11.27]	gi|478246983|ref|NP_001264420.1|//4-hydroxyphenylpyruvate dioxygenase [Gallus gallus]
416445	3494	15637	7314	-1.0844	0	Down	0	FAM20C	NA	NA	NA	K20825//glycosaminoglycan xylosylkinase [EC:2.7.1.-];K19347//SUN domain-containing protein 1/2	gi|971419113|ref|XP_015149804.1|//PREDICTED: LOW QUALITY PROTEIN: extracellular serine/threonine protein kinase FAM20C [Gallus gallus]
415121	2405	2486	7834	1.66775	0	Up	0	CYP4V2	NA	NA	NA	K07427//cytochrome P450 family 4 subfamily V	gi|50657412|ref|NP_001001879.1|//cytochrome P450, family 4, subfamily V, polypeptide 2 [Gallus gallus]
771464	2032	1121	5248	2.23881	0	Up	0	ADTRP	NA	NA	NA	NA	gi|513170532|ref|XP_004939711.1|//PREDICTED: androgen-dependent TFPI-regulating protein isoform X2 [Gallus gallus];gi|118086404|ref|XP_001234747.1|//PREDICTED: androgen-dependent TFPI-regulating protein isoform X1 [Gallus gallus]
396389	2107	4499	752	-2.56897	0	Down	0	NTN1	GO:0071944//cell periphery;GO:0005737//cytoplasm;GO:0005604//basement membrane	GO:0005515//protein binding	GO:0032488//Cdc42 protein signal transduction;GO:0033564//anterior/posterior axon guidance;GO:0045773//positive regulation of axon extension;GO:0001764//neuron migration;GO:0042472//inner ear morphogenesis;GO:0030334//regulation of cell migration;GO:2000147//positive regulation of cell motility;GO:0030517//negative regulation of axon extension;GO:0008284//positive regulation of cell proliferation…	K06843//netrin 1	gi|46048659|ref|NP_990750.1|//netrin-1 precursor [Gallus gallus]
428660	8465	6898	1947	-1.8131	0	Down	0	GVIN1	NA	GO:0005525//GTP binding	NA	K12797//caspase recruitment domain-containing protein 6	gi|363732545|ref|XP_426218.3|//PREDICTED: interferon-induced very large GTPase 1 [Gallus gallus]
421561	3759	12404	5298	-1.21546	0	Down	0	DACT2	NA	NA	NA	NA	gi|971388593|ref|XP_015139850.1|//PREDICTED: dapper homolog 2 [Gallus gallus]
415884	2002	2726	96	-4.81578	0	Down	0	TAT	NA	NA	NA	K00815//tyrosine aminotransferase [EC:2.6.1.5]	gi|50754073|ref|XP_414240.1|//PREDICTED: tyrosine aminotransferase [Gallus gallus]
417480	3918	13053	5799	-1.15868	0	Down	0	WBSCR17	GO:0016021//integral component of membrane;GO:0000139//Golgi membrane	GO:0030246//carbohydrate binding;GO:0016757//transferase activity, transferring glycosyl groups	GO:0006486//protein glycosylation	K00710//polypeptide N-acetylgalactosaminyltransferase [EC:2.4.1.41]	gi|118100067|ref|XP_415728.2|//PREDICTED: putative polypeptide N-acetylgalactosaminyltransferase-like protein 3 [Gallus gallus]
373915	4189	8342	2866	-1.52952	0	Down	0	SREBF1	NA	NA	NA	K07197//sterol regulatory element-binding transcription factor 1	gi|806638697|ref|NP_989457.2|//sterol regulatory element-binding protein 1 [Gallus gallus];gi|971418633|ref|XP_015149594.1|//PREDICTED: sterol regulatory element-binding protein 1 isoform X2 [Gallus gallus];gi|971418631|ref|XP_015149592.1|//PREDICTED: sterol regulatory element-binding protein 1 isoform X1 [Gallus gallus];gi|971418635|ref|XP_015149595.1|//PREDICTED: sterol regulatory element-bindi…
420442	3120	9258	3449	-1.41269	0	Down	0	INSIG1	GO:0032937//SREBP-SCAP-Insig complex	NA	GO:1901303//negative regulation of cargo loading into COPII-coated vesicle;GO:0006641//triglyceride metabolic process;GO:0006695//cholesterol biosynthetic process;GO:0010894//negative regulation of steroid biosynthetic process;GO:0045599//negative regulation of fat cell differentiation;GO:0032933//SREBP signaling pathway;GO:0060363//cranial suture morphogenesis;GO:0042474//middle ear morphogenesi…	NA	gi|71896645|ref|NP_001026137.1|//insulin-induced gene 1 protein [Gallus gallus]
427013	2784	11519	4980	-1.19797	0	Down	0	FKBP10	NA	NA	NA	K09575//FK506-binding protein 9/10 [EC:5.2.1.8]	gi|363743597|ref|XP_003642878.1|//PREDICTED: peptidyl-prolyl cis-trans isomerase FKBP10 [Gallus gallus]
415521	4876	12659	5746	-1.1277	0	Down	0	CHSY1	NA	NA	NA	K13499//chondroitin sulfate synthase [EC:2.4.1.175 2.4.1.226]	gi|971413668|ref|XP_015147744.1|//PREDICTED: chondroitin sulfate synthase 1 [Gallus gallus]
419533	3506	9067.25	3441	-1.38601	0	Down	0	LOXL2	NA	NA	NA	K00280//lysyl oxidase-like protein 2/3/4 [EC:1.4.3.-]	gi|971429800|ref|XP_015152802.1|//PREDICTED: lysyl oxidase homolog 2 isoform X1 [Gallus gallus];gi|761631394|ref|NP_001292097.1|//lysyl oxidase homolog 2 precursor [Gallus gallus]
396474	1260	8649.18	3198.63	-1.42328	0	Down	0	LOX	GO:0031012//extracellular matrix;GO:0005615//extracellular space	GO:0005507//copper ion binding;GO:0004720//protein-lysine 6-oxidase activity	GO:0055114//oxidation-reduction process	K00277//protein-lysine 6-oxidase [EC:1.4.3.13]	gi|760996851|ref|NP_990812.2|//protein-lysine 6-oxidase precursor [Gallus gallus]
416291	4372	13007	6038	-1.09532	0	Down	0	ADAMTS2	NA	NA	NA	K08618//a disintegrin and metalloproteinase with thrombospondin motifs 2 [EC:3.4.24.14]	gi|971417903|ref|XP_414611.5|//PREDICTED: A disintegrin and metalloproteinase with thrombospondin motifs 2 [Gallus gallus]
373928	3906	7082	14238	1.01935	0	Up	0	PPARG	GO:0090575//RNA polymerase II transcription factor complex;GO:0005794//Golgi apparatus	GO:0003707//steroid hormone receptor activity;GO:0042802//identical protein binding;GO:0030374//ligand-dependent nuclear receptor transcription coactivator activity;GO:0004879//RNA polymerase II transcription factor activity, ligand-activated sequence-specific DNA binding;GO:0044212//transcription regulatory region DNA binding;GO:0046965//retinoid X receptor binding;GO:0008144//drug binding;GO:00…	GO:0008217//regulation of blood pressure;GO:0010891//negative regulation of sequestering of triglyceride;GO:0042593//glucose homeostasis;GO:0000122//negative regulation of transcription from RNA polymerase II promoter;GO:0035357//peroxisome proliferator activated receptor signaling pathway;GO:0051091//positive regulation of sequence-specific DNA binding transcription factor activity;GO:0042953//l…	K08530//peroxisome proliferator-activated receptor gamma	gi|971415719|ref|XP_015148418.1|//PREDICTED: peroxisome proliferator-activated receptor gamma isoform X2 [Gallus gallus];gi|733907503|ref|XP_010716734.1|//PREDICTED: peroxisome proliferator-activated receptor gamma isoform X2 [Meleagris gallopavo]
420841	2769	5050	11308	1.17482	0	Up	0	MYLIP	NA	NA	NA	K10637//E3 ubiquitin-protein ligase MYLIP [EC:2.3.2.27]	gi|60302772|ref|NP_001012579.1|//E3 ubiquitin-protein ligase MYLIP [Gallus gallus]
395545	2002	2693	7598	1.50824	0	Up	0	FRZB	GO:0005615//extracellular space;GO:0016021//integral component of membrane	GO:0042813//Wnt-activated receptor activity;GO:0017147//Wnt-protein binding;GO:0004930//G-protein coupled receptor activity	GO:0007186//G-protein coupled receptor signaling pathway;GO:0030308//negative regulation of cell growth;GO:0035567//non-canonical Wnt signaling pathway;GO:0060029//convergent extension involved in organogenesis;GO:0061053//somite development;GO:0014033//neural crest cell differentiation;GO:0045600//positive regulation of fat cell differentiation;GO:0090103//cochlea morphogenesis;GO:0090090//negat…	K02185//secreted frizzled-related protein 4	gi|45382117|ref|NP_990103.1|//secreted frizzled-related protein 3 precursor [Gallus gallus]
396277	739	2499	136	-4.18784	0	Down	0	TTR	GO:0032991//macromolecular complex;GO:0070062//extracellular exosome;GO:0005615//extracellular space;GO:0060417//yolk;GO:0030136//clathrin-coated vesicle	GO:0019904//protein domain specific binding;GO:0070324//thyroid hormone binding;GO:0042802//identical protein binding;GO:0005179//hormone activity;GO:0036094//small molecule binding	GO:0001555//oocyte growth;GO:0070327//thyroid hormone transport;GO:0042572//retinol metabolic process;GO:0006461//protein complex assembly;GO:0009615//response to virus	K20731//transthyretin	gi|527498286|ref|NP_001268427.1|//transthyretin isoform 2 [Gallus gallus];gi|45384444|ref|NP_990666.1|//transthyretin isoform 1 precursor [Gallus gallus]
424912	3269	7859	2804	-1.47503	0	Down	0	BCL6	GO:0005634//nucleus;GO:0005657//replication fork	GO:0046872//metal ion binding;GO:0000977//RNA polymerase II regulatory region sequence-specific DNA binding;GO:0031490//chromatin DNA binding;GO:0001161//intronic transcription regulatory region sequence-specific DNA binding;GO:0001227//transcriptional repressor activity, RNA polymerase II transcription regulatory region sequence-specific binding	GO:0043380//regulation of memory T cell differentiation;GO:0045666//positive regulation of neuron differentiation;GO:0000060//protein import into nucleus, translocation;GO:0007283//spermatogenesis;GO:0000122//negative regulation of transcription from RNA polymerase II promoter;GO:0030890//positive regulation of B cell proliferation;GO:0031065//positive regulation of histone deacetylation;GO:00456…	K15618//B-cell lymphoma 6 protein	gi|61098402|ref|NP_001012948.1|//B-cell lymphoma 6 protein homolog [Gallus gallus];gi|971410685|ref|XP_015146892.1|//PREDICTED: B-cell lymphoma 6 protein homolog isoform X1 [Gallus gallus]
420996	5133	4043.69	747.92	-2.42289	0	Down	0	NR4A3	GO:0005634//nucleus;GO:0005667//transcription factor complex;GO:0042629//mast cell granule	GO:0003707//steroid hormone receptor activity;GO:0000978//RNA polymerase II core promoter proximal region sequence-specific DNA binding;GO:0001223//transcription coactivator binding;GO:0001046//core promoter sequence-specific DNA binding;GO:0001077//transcriptional activator activity, RNA polymerase II core promoter proximal region sequence-specific binding;GO:0004879//RNA polymerase II transcrip…	GO:0060005//vestibular reflex;GO:0021766//hippocampus development;GO:0046321//positive regulation of fatty acid oxidation;GO:1900625//positive regulation of monocyte aggregation;GO:0043303//mast cell degranulation;GO:2000108//positive regulation of leukocyte apoptotic process;GO:0007411//axon guidance;GO:0009444//pyruvate oxidation;GO:0043524//negative regulation of neuron apoptotic process;GO:20…	K08559//nuclear receptor subfamily 4 group A member 3	gi|363730515|ref|XP_419081.3|//PREDICTED: nuclear receptor subfamily 4 group A member 3 isoform X2 [Gallus gallus];gi|971383120|ref|XP_015137891.1|//PREDICTED: nuclear receptor subfamily 4 group A member 3 isoform X1 [Gallus gallus]
768711	4294	3691	9091	1.31226	0	Up	0	TIMP4	NA	NA	NA	K16866//metalloproteinase inhibitor 3	gi|118096801|ref|XP_001232059.1|//PREDICTED: metalloproteinase inhibitor 4 [Gallus gallus]
417431	1385	2534	172	-3.86911	0	Down	0	APOH	NA	NA	NA	K17305//beta-2-glycoprotein 1	gi|487439524|ref|NP_001264923.1|//beta-2-glycoprotein 1 precursor [Gallus gallus]
107050180	613	3080	384	-2.99192	0	Down	0	LOC107050180	NA	NA	NA	NA	gi|971449382|ref|XP_015129455.1|//PREDICTED: uncharacterized protein LOC107050180 [Gallus gallus]
396535	14150	2226	87	-4.66546	0	Down	0	APOB	GO:0070062//extracellular exosome;GO:0005783//endoplasmic reticulum;GO:0034362//low-density lipoprotein particle;GO:0043025//neuronal cell body;GO:0034363//intermediate-density lipoprotein particle;GO:0034359//mature chylomicron;GO:0005794//Golgi apparatus;GO:0034361//very-low-density lipoprotein particle;GO:0015629//actin cytoskeleton;GO:0005886//plasma membrane	GO:0035473//lipase binding;GO:0008201//heparin binding;GO:0017127//cholesterol transporter activity;GO:0050750//low-density lipoprotein particle receptor binding;GO:0005543//phospholipid binding	GO:0007399//nervous system development;GO:0010744//positive regulation of macrophage derived foam cell differentiation;GO:0019433//triglyceride catabolic process;GO:0006642//triglyceride mobilization;GO:0034374//low-density lipoprotein particle remodeling;GO:0007283//spermatogenesis;GO:0033344//cholesterol efflux;GO:0045540//regulation of cholesterol biosynthetic process;GO:0009791//post-embryoni…	K14462//apolipoprotein B	gi|113206052|ref|NP_001038098.1|//apolipoprotein B precursor [Gallus gallus]
395304	4306	11799	5537	-1.07966	0	Down	0	SREBF2	NA	NA	NA	K09107//sterol regulatory element-binding transcription factor 2	gi|971372714|ref|XP_015144523.1|//PREDICTED: sterol regulatory element-binding protein 2 [Gallus gallus]
419037	3419	3048	7899	1.38564	0	Up	0	BEND7	NA	NA	NA	K10486//BTB/POZ domain-containing protein 14	gi|533112513|ref|NP_001269164.1|//BEN domain-containing protein 7 [Gallus gallus]
416010	1664	2836	7558	1.42598	0	Up	0	IP6K2	NA	NA	NA	K07756//inositol-hexakisphosphate 5-kinase [EC:2.7.4.21]	gi|158303320|ref|NP_001025767.2|//inositol hexakisphosphate kinase 2 [Gallus gallus]
426773	789	6388	12831	1.01803	0	Up	0	EIF4EBP1	NA	NA	NA	K07205//eukaryotic translation initiation factor 4E binding protein 1	gi|50806236|ref|XP_424384.1|//PREDICTED: eukaryotic translation initiation factor 4E-binding protein 1 [Gallus gallus]
771179	2727	7238	2595	-1.46803	0	Down	0	PLEKHN1	NA	NA	NA	K13710//Rho guanine nucleotide exchange factor 7;K05729//Rho guanine nucleotide exchange factor 6	gi|363741960|ref|XP_003642573.1|//PREDICTED: pleckstrin homology domain-containing family N member 1 [Gallus gallus]
426986	6475	3380.19	8383.71	1.32231	0	Up	0	MAPK8IP3	NA	NA	NA	K04436//mitogen-activated protein kinase 8 interacting protein 3	gi|971444102|ref|XP_015157413.1|//PREDICTED: C-Jun-amino-terminal kinase-interacting protein 3 isoform X2 [Gallus gallus];gi|971444106|ref|XP_015157416.1|//PREDICTED: C-Jun-amino-terminal kinase-interacting protein 3 isoform X4 [Gallus gallus];gi|971444118|ref|XP_015157422.1|//PREDICTED: C-Jun-amino-terminal kinase-interacting protein 3 isoform X10 [Gallus gallus];gi|971444112|ref|XP_015157419.1|…
395398	6431	6005.61	12198.7	1.03418	0	Up	0	NRXN1	GO:0005783//endoplasmic reticulum;GO:0031965//nuclear membrane;GO:0031982//vesicle;GO:0043025//neuronal cell body;GO:0009986//cell surface;GO:0043234//protein complex;GO:0042734//presynaptic membrane;GO:0016021//integral component of membrane	GO:0033130//acetylcholine receptor binding;GO:0046872//metal ion binding;GO:0050839//cell adhesion molecule binding;GO:0097109//neuroligin family protein binding;GO:0005246//calcium channel regulator activity	GO:0051965//positive regulation of synapse assembly;GO:0007269//neurotransmitter secretion;GO:0051968//positive regulation of synaptic transmission, glutamatergic;GO:0061178//regulation of insulin secretion involved in cellular response to glucose stimulus;GO:2000821//regulation of grooming behavior;GO:0097116//gephyrin clustering involved in postsynaptic density assembly;GO:0001525//angiogenesis…	K07377//neurexin	gi|312176427|ref|NP_001185905.1|//neurexin-1-alpha isoform 2 precursor [Gallus gallus];gi|971385866|ref|XP_015133515.1|//PREDICTED: neurexin-1-alpha isoform X11 [Gallus gallus];gi|971385862|ref|XP_015133513.1|//PREDICTED: neurexin-1-alpha isoform X9 [Gallus gallus];gi|971385854|ref|XP_015133509.1|//PREDICTED: neurexin-1-alpha isoform X5 [Gallus gallus];gi|971385858|ref|XP_015133511.1|//PREDICTED:…
107050076	1712	941.47	4093.41	2.13215	0	Up	0	LOC107050076	NA	NA	NA	K17495//CUB and sushi domain-containing protein;K18273//alpha-tectorin;K17341//hemicentin;K06496//selectin, platele	gi|971449120|ref|XP_015129351.1|//PREDICTED: IgGFc-binding protein-like, partial [Gallus gallus]
429033	8364	5070	1471	-1.77336	0	Down	0	SPEG	NA	GO:0004674//protein serine/threonine kinase activity;GO:0005524//ATP binding	GO:0006468//protein phosphorylation	K08809//striated muscle-specific serine/threonine protein kinase [EC:2.7.11.1]	gi|971406596|ref|XP_015145589.1|//PREDICTED: striated muscle preferentially expressed protein kinase isoform X7 [Gallus gallus];gi|971406604|ref|XP_015145593.1|//PREDICTED: striated muscle preferentially expressed protein kinase isoform X10 [Gallus gallus];gi|971406590|ref|XP_015145586.1|//PREDICTED: striated muscle preferentially expressed protein kinase isoform X4 [Gallus gallus];gi|971406594|r…
395993	2933	5240	1570	-1.72697	0	Down	0	GFRA2	GO:0005886//plasma membrane;GO:0031225//anchored component of membrane	GO:0004872//receptor activity	GO:0007399//nervous system development;GO:0007169//transmembrane receptor protein tyrosine kinase signaling pathway	K19895//GDNF family receptor alpha 1	gi|45384148|ref|NP_990432.1|//GDNF family receptor alpha-2 precursor [Gallus gallus]
421753	6803	4643.81	9991.04	1.11716	0	Up	0	SLC16A10	NA	NA	NA	K08187//MFS transporter, MCP family, solute carrier family 16 (monocarboxylic acid transporters), member 10	gi|944216801|gb|KQK82639.1|//monocarboxylate transporter 10 [Amazona aestiva]
770617	3268	10349	4844	-1.08339	0	Down	0	LOC770617	NA	NA	NA	NA	gi|118098303|ref|XP_001232349.1|//PREDICTED: transmembrane protein 100-like [Gallus gallus]
421142	6278	11277.8	5504.47	-1.02298	0	Down	0	ASPH	NA	NA	NA	K00476//aspartate beta-hydroxylase [EC:1.14.11.16]	gi|971384095|ref|XP_015138194.1|//PREDICTED: aspartyl/asparaginyl beta-hydroxylase isoform X5 [Gallus gallus];gi|971384099|ref|XP_015138196.1|//PREDICTED: aspartyl/asparaginyl beta-hydroxylase isoform X7 [Gallus gallus];gi|971384103|ref|XP_015138199.1|//PREDICTED: aspartyl/asparaginyl beta-hydroxylase isoform X9 [Gallus gallus];gi|971384097|ref|XP_015138195.1|//PREDICTED: aspartyl/asparaginyl bet…
395315	3838	5230	1615	-1.68345	0	Down	0	GART	GO:0070062//extracellular exosome;GO:0005829//cytosol	GO:0046872//metal ion binding;GO:0005524//ATP binding;GO:0004641//phosphoribosylformylglycinamidine cyclo-ligase activity;GO:0004637//phosphoribosylamine-glycine ligase activity;GO:0004644//phosphoribosylglycinamide formyltransferase activity	GO:0009113//purine nucleobase biosynthetic process;GO:0006189//'de novo' IMP biosynthetic process	K11787//phosphoribosylamine--glycine ligase / phosphoribosylglycinamide formyltransferase / phosphoribosylformylglycinamidine cyclo-ligase [EC:6.3.4.13 2.1.2.2 6.3.3.1]	gi|47825387|ref|NP_001001469.1|//trifunctional purine biosynthetic protein adenosine-3 [Gallus gallus];gi|68299602|gb|AAT76522.2|//glycinamide ribonucleotide synthetase-aminoimidazole ribonucleotide synthetase-glycinamide ribonucleotide transformylase [Gallus gallus]
395502	2789	2205.36	6134.82	1.48784	0	Up	0	HOXB3	GO:0005634//nucleus	GO:0043565//sequence-specific DNA binding;GO:0003700//transcription factor activity, sequence-specific DNA binding	GO:0006355//regulation of transcription, DNA-templated;GO:0007275//multicellular organism development	K09303//homeobox protein HoxA/B/D3	gi|743405611|ref|NP_990074.2|//homeobox protein Hox-B3 [Gallus gallus] ;gi|971434998|ref|XP_015154912.1|//PREDICTED: homeobox protein Hox-B3 isoform X1 [Gallus gallus]
424367	1954	3195	605	-2.38898	0	Down	0	HSD17B7	NA	NA	NA	K13373//17beta-estradiol 17-dehydrogenase / 3beta-hydroxysteroid 3-dehydrogenase [EC:1.1.1.62 1.1.1.270]	gi|478247011|ref|NP_001264435.1|//3-keto-steroid reductase isoform 1 [Gallus gallus];gi|478247013|ref|NP_001264436.1|//3-keto-steroid reductase isoform 2 [Gallus gallus]
395364	1654	2410.62	279.88	-3.09469	0	Down	0	PIT54	GO:0016020//membrane	GO:0005044//scavenger receptor activity	GO:0006898//receptor-mediated endocytosis	K13912//deleted in malignant brain tumors 1 protein	gi|46395491|ref|NP_997063.1|//PIT54 protein precursor [Gallus gallus]
421580	2928	1967.96	122	-3.99992	0	Down	0	PLG	NA	NA	NA	K01315//plasminogen [EC:3.4.21.7]	gi|118088308|ref|XP_419618.2|//PREDICTED: plasminogen [Gallus gallus]
395153	4622	6371	2360	-1.4209	0	Down	0	PTPRU	GO:0016021//integral component of membrane;GO:0030054//cell junction;GO:0005886//plasma membrane	GO:0004725//protein tyrosine phosphatase activity	GO:0007155//cell adhesion;GO:0030154//cell differentiation;GO:0035335//peptidyl-tyrosine dephosphorylation	K16662//receptor-type tyrosine-protein phosphatase U [EC:3.1.3.48]	gi|45383181|ref|NP_989823.1|//receptor-type tyrosine-protein phosphatase U precursor [Gallus gallus]
395335	1262	1053	4032	1.94882	0	Up	0	CISH	GO:0005737//cytoplasm;GO:0005886//plasma membrane	GO:0004860//protein kinase inhibitor activity	GO:0006469//negative regulation of protein kinase activity;GO:0007205//protein kinase C-activating G-protein coupled receptor signaling pathway;GO:0046627//negative regulation of insulin receptor signaling pathway;GO:0040008//regulation of growth;GO:0016567//protein ubiquitination;GO:0046426//negative regulation of JAK-STAT cascade;GO:0019221//cytokine-mediated signaling pathway	K04701//cytokine inducible SH2-containing protein	gi|45382897|ref|NP_989957.1|//cytokine-inducible SH2-containing protein [Gallus gallus]
428074	3163	574.37	3066.32	2.42829	0	Up	0	STOML3	NA	NA	NA	K17286//erythrocyte band 7 integral membrane protein	gi|513165575|ref|XP_425632.3|//PREDICTED: stomatin-like protein 3 [Gallus gallus]
395696	1455	2384	275	-3.10405	0	Down	0	GC	GO:0070062//extracellular exosome;GO:0072562//blood microparticle	GO:0003779//actin binding;GO:1902118//calcidiol binding;GO:0051183//vitamin transporter activity	GO:0051180//vitamin transport;GO:0042359//vitamin D metabolic process	K12258//vitamin D-binding protein	gi|45382425|ref|NP_990213.1|//vitamin D-binding protein precursor [Gallus gallus]
424661	3777	2305.37	246.62	-3.21281	0	Down	0	DHCR24	NA	NA	NA	K09828//Delta24-sterol reductase [EC:1.3.1.72 1.3.1.-]	gi|71896815|ref|NP_001026459.1|//delta(24)-sterol reductase [Gallus gallus]
417185	1510	8102	3480	-1.20736	0	Down	0	ASS1	GO:0070062//extracellular exosome;GO:0005737//cytoplasm	GO:0005524//ATP binding;GO:0016597//amino acid binding;GO:0004055//argininosuccinate synthase activity;GO:0042802//identical protein binding	GO:0006531//aspartate metabolic process;GO:0000053//argininosuccinate metabolic process;GO:0006526//arginine biosynthetic process;GO:1903038//negative regulation of leukocyte cell-cell adhesion;GO:0071499//cellular response to laminar fluid shear stress;GO:0045429//positive regulation of nitric oxide biosynthetic process;GO:0000050//urea cycle;GO:0000052//citrulline metabolic process	K01940//argininosuccinate synthase [EC:6.3.4.5]	gi|61657937|ref|NP_001013413.1|//argininosuccinate synthase [Gallus gallus]
395885	2613	2841	469	-2.58691	0	Down	0	CNTFR	GO:0016324//apical plasma membrane;GO:0097059//CNTFR-CLCF1 complex;GO:0031225//anchored component of membrane;GO:0070110//ciliary neurotrophic factor receptor complex	GO:0004897//ciliary neurotrophic factor receptor activity;GO:0019955//cytokine binding;GO:0005102//receptor binding	GO:0007548//sex differentiation;GO:0070120//ciliary neurotrophic factor-mediated signaling pathway;GO:0043524//negative regulation of neuron apoptotic process;GO:0060538//skeletal muscle organ development;GO:0003360//brainstem development;GO:0008284//positive regulation of cell proliferation	K05059//ciliary neurotrophic factor receptor	gi|45384302|ref|NP_990359.1|//ciliary neurotrophic factor receptor subunit alpha precursor [Gallus gallus];gi|971437445|ref|XP_015132730.1|//PREDICTED: ciliary neurotrophic factor receptor subunit alpha isoform X2 [Gallus gallus];gi|971437443|ref|XP_015132729.1|//PREDICTED: ciliary neurotrophic factor receptor subunit alpha isoform X1 [Gallus gallus];gi|971437447|ref|XP_015132732.1|//PREDICTED: c…
395759	12157	2006.76	146.49	-3.76416	0	Down	0	SLC8A3	GO:0005887//integral component of plasma membrane;GO:0031594//neuromuscular junction;GO:0042383//sarcolemma;GO:0005741//mitochondrial outer membrane;GO:0005789//endoplasmic reticulum membrane;GO:0048471//perinuclear region of cytoplasm	GO:0005432//calcium:sodium antiporter activity	GO:0006851//mitochondrial calcium ion transmembrane transport;GO:0042552//myelination;GO:0070588//calcium ion transmembrane transport;GO:0071456//cellular response to hypoxia;GO:0002244//hematopoietic progenitor cell differentiation;GO:0035725//sodium ion transmembrane transport;GO:0048709//oligodendrocyte differentiation;GO:0007612//learning;GO:0014819//regulation of skeletal muscle contraction;…	K05849//solute carrier family 8 (sodium/calcium exchanger)	gi|641386887|ref|NP_001280026.1|//sodium/calcium exchanger 3 precursor [Gallus gallus];gi|971398963|ref|XP_015142768.1|//PREDICTED: sodium/calcium exchanger 3 isoform X1 [Gallus gallus]
101410532	1417	9188	4231	-1.10692	0	Down	0	SELM	NA	NA	NA	NA	gi|482661621|ref|NP_001264788.1|//selenoprotein M precursor [Gallus gallus]
422610	2338	6712	2619	-1.3459	0	Down	0	AGPAT9	GO:0016021//integral component of membrane;GO:0005789//endoplasmic reticulum membrane	GO:0004366//glycerol-3-phosphate O-acyltransferase activity;GO:0003841//1-acylglycerol-3-phosphate O-acyltransferase activity	GO:0032006//regulation of TOR signaling;GO:0016024//CDP-diacylglycerol biosynthetic process;GO:0019432//triglyceride biosynthetic process	K13506//glycerol-3-phosphate O-acyltransferase 3/4 [EC:2.3.1.15]	gi|971393237|ref|XP_015131755.1|//PREDICTED: glycerol-3-phosphate acyltransferase 3 isoform X1 [Gallus gallus];gi|971393239|ref|XP_015131756.1|//PREDICTED: glycerol-3-phosphate acyltransferase 3 isoform X2 [Gallus gallus];gi|71896719|ref|NP_001026316.1|//glycerol-3-phosphate acyltransferase 3 [Gallus gallus]
107049736	1017	7009.61	2817.24	-1.30322	0	Down	0	LOC107049736	NA	NA	NA	K19934//calcium-binding protein	gi|971448290|ref|XP_015129037.1|//PREDICTED: calumenin-like [Gallus gallus]
769415	4213	415.24	2622.92	2.67099	0	Up	0	ENS-1	NA	NA	NA	NA	gi|124249436|ref|NP_001074342.1|//uncharacterized protein LOC769415 [Gallus gallus]
770956	2996	2970	7116	1.27243	0	Up	0	TMEM37	NA	NA	NA	NA	gi|118093869|ref|XP_001234272.1|//PREDICTED: voltage-dependent calcium channel gamma-like subunit [Gallus gallus]
396119	1164	1282	4342	1.77179	0	Up	0	FST	GO:0005615//extracellular space	GO:0048185//activin binding	GO:1902873//negative regulation of horizontal cell localization;GO:0002244//hematopoietic progenitor cell differentiation;GO:1902864//negative regulation of embryonic camera-type eye development;GO:0046670//positive regulation of retinal cell programmed cell death;GO:1902870//negative regulation of amacrine cell differentiation;GO:0000122//negative regulation of transcription from RNA polymerase …	K04661//follistatin	gi|45383944|ref|NP_990531.1|//follistatin precursor [Gallus gallus]
419413	4184	4707	1463	-1.67405	0	Down	0	VWA1	NA	NA	NA	K08132//collagen, type XII, alpha	gi|363741828|ref|XP_417574.3|//PREDICTED: von Willebrand factor A domain-containing protein 1 isoform X1 [Gallus gallus];gi|513219609|ref|XP_004947461.1|//PREDICTED: von Willebrand factor A domain-containing protein 1 isoform X2 [Gallus gallus]
426601	2040	9566	4571	-1.05358	0	Down	0	PHYH	NA	NA	NA	K00477//phytanoyl-CoA hydroxylase [EC:1.14.11.18]	gi|971370258|ref|XP_424238.4|//PREDICTED: phytanoyl-CoA dioxygenase, peroxisomal [Gallus gallus]
417147	6063	6476.17	2543.57	-1.33646	0	Down	0	ADAMTSL2	GO:0005578//proteinaceous extracellular matrix	GO:0004222//metalloendopeptidase activity;GO:0008270//zinc ion binding;GO:0050436//microfibril binding	GO:0006508//proteolysis;GO:0030198//extracellular matrix organization;GO:0030512//negative regulation of transforming growth factor beta receptor signaling pathway;GO:0060481//lobar bronchus epithelium development	K08624//a disintegrin and metalloproteinase with thrombospondin motifs 9 [EC:3.4.24.-];K08632//a disintegrin and metalloproteinase with thrombospondin motifs 18 [EC:3.4.24.-]	gi|971423748|ref|XP_004946003.2|//PREDICTED: ADAMTS-like protein 2 isoform X2 [Gallus gallus];gi|971423755|ref|XP_015135265.1|//PREDICTED: ADAMTS-like protein 2 isoform X5 [Gallus gallus];gi|971423765|ref|XP_004946010.2|//PREDICTED: ADAMTS-like protein 2 isoform X8 [Gallus gallus];gi|971423750|ref|XP_003642352.3|//PREDICTED: ADAMTS-like protein 2 isoform X3 [Gallus gallus];gi|971423746|ref|XP_004…
423453	1986	9024.93	4238.93	-1.07839	0	Down	0	EVL	NA	NA	NA	K05746//enabled	gi|971399322|ref|XP_015142958.1|//PREDICTED: ena/VASP-like protein isoform X2 [Gallus gallus];gi|971399326|ref|XP_015142960.1|//PREDICTED: ena/VASP-like protein isoform X4 [Gallus gallus];gi|57529919|ref|NP_001006487.1|//ena/VASP-like protein [Gallus gallus] ;gi|971399320|ref|XP_015142957.1|//PREDICTED: ena/VASP-like protein isoform X1 [Gallus gallus]
769222	12300	4041	1143	-1.81006	0	Down	0	ADAMTS8	NA	NA	NA	K08623//a disintegrin and metalloproteinase with thrombospondin motifs 8 [EC:3.4.24.-]	gi|971431704|ref|XP_015153616.1|//PREDICTED: A disintegrin and metalloproteinase with thrombospondin motifs 8 [Gallus gallus]
428837	4492	354.22	2374.86	2.75695	0	Up	0	PAK6	GO:0005737//cytoplasm	GO:0005524//ATP binding;GO:0004702//signal transducer, downstream of receptor, with serine/threonine kinase activity	GO:0023014//signal transduction by protein phosphorylation;GO:0000278//mitotic cell cycle;GO:0007613//memory;GO:0007626//locomotory behavior;GO:0007612//learning	K05735//p21-activated kinase 6 [EC:2.7.11.1]	gi|513185859|ref|XP_004941348.1|//PREDICTED: serine/threonine-protein kinase PAK 6 isoform X2 [Gallus gallus];gi|513185848|ref|XP_004941345.1|//PREDICTED: serine/threonine-protein kinase PAK 6 isoform X1 [Gallus gallus]
416041	2485	3369	7519	1.17005	0	Up	0	SLC6A6	NA	NA	NA	K05039//solute carrier family 6 (neurotransmitter transporter, GABA) member 6/8/11/12/13	gi|971416029|ref|XP_015148576.1|//PREDICTED: sodium- and chloride-dependent taurine transporter isoform X3 [Gallus gallus];gi|683915119|ref|XP_009089353.1|//PREDICTED: sodium- and chloride-dependent taurine transporter isoform X1 [Serinus canaria];gi|971416025|ref|XP_015148574.1|//PREDICTED: sodium- and chloride-dependent taurine transporter isoform X1 [Gallus gallus];gi|971416031|ref|XP_01514857…
421709	9713	5840.21	2226.43	-1.37946	0	Down	0	LAMA2	NA	NA	NA	K05637//laminin, alpha 1/2	gi|971387840|ref|XP_015139613.1|//PREDICTED: laminin subunit alpha-2 isoform X1 [Gallus gallus];gi|971387842|ref|XP_015139614.1|//PREDICTED: laminin subunit alpha-2 isoform X2 [Gallus gallus];gi|971387844|ref|XP_015139615.1|//PREDICTED: laminin subunit alpha-2 isoform X3 [Gallus gallus];gi|971387846|ref|XP_015139616.1|//PREDICTED: laminin subunit alpha-2 isoform X4 [Gallus gallus]
395220	814	1838	149	-3.61292	0	Down	0	ORM1	GO:0005615//extracellular space	NA	GO:0006810//transport;GO:0002682//regulation of immune system process	K17308//alpha-1-acid glycoprotein 1	gi|45383093|ref|NP_989872.1|//orosomucoid 1 (ovoglycoprotein) precursor [Gallus gallus]
107054036	4114	2721.67	6513.75	1.27083	0	Up	0	LOC107054036	NA	NA	NA	K06240//laminin, alpha 3/5	gi|971409219|ref|XP_015146692.1|//PREDICTED: endogenous retrovirus group K member 9 Pol protein-like [Gallus gallus]
420179	1649	4057.64	1190.16	-1.75766	0	Down	0	MSC	NA	NA	NA	K09072//musculin (activated B-cell factor-1)	gi|971384494|ref|XP_015138366.1|//PREDICTED: musculin [Gallus gallus]
414143	2978	1252	4072	1.71333	0	Up	0	LEPREL1	GO:0005783//endoplasmic reticulum;GO:0005794//Golgi apparatus;GO:0005604//basement membrane	GO:0005506//iron ion binding;GO:0019797//procollagen-proline 3-dioxygenase activity;GO:0031418//L-ascorbic acid binding	GO:0032963//collagen metabolic process;GO:0019511//peptidyl-proline hydroxylation;GO:0055114//oxidation-reduction process;GO:0008285//negative regulation of cell proliferation	K08134//leucine proline-enriched proteoglycan (leprecan)	gi|971410640|ref|XP_015146870.1|//PREDICTED: prolyl 3-hydroxylase 2 isoform X1 [Gallus gallus];gi|971410642|ref|XP_015146871.1|//PREDICTED: prolyl 3-hydroxylase 2 isoform X2 [Gallus gallus];gi|48374055|ref|NP_001001530.1|//prolyl 3-hydroxylase 2 precursor [Gallus gallus]
416907	3222	8670	4163	-1.04658	0	Down	0	HPS4	NA	NA	NA	K20194//Hermansky-Pudlak syndrome 4 protein	gi|513210470|ref|XP_415198.3|//PREDICTED: Hermansky-Pudlak syndrome 4 protein isoform X3 [Gallus gallus];gi|513210474|ref|XP_004945696.1|//PREDICTED: Hermansky-Pudlak syndrome 4 protein isoform X2 [Gallus gallus];gi|971421305|ref|XP_015130975.1|//PREDICTED: Hermansky-Pudlak syndrome 4 protein isoform X1 [Gallus gallus]
100858010	4876	2169	302	-2.83258	0	Down	0	A2ML4	GO:0005615//extracellular space	GO:0004866//endopeptidase inhibitor activity	GO:0010951//negative regulation of endopeptidase activity	K03910//alpha-2-macroglobulin	gi|971434955|ref|XP_015154891.1|//PREDICTED: alpha-2-macroglobulin-like protein 1 [Gallus gallus]
395797	2488	4865	1713	-1.49408	0	Down	0	ENTPD2	GO:0005605//basal lamina;GO:0070062//extracellular exosome;GO:0016021//integral component of membrane;GO:0005886//plasma membrane	GO:0005524//ATP binding;GO:0016887//ATPase activity;GO:0017110//nucleoside-diphosphatase activity	GO:0007186//G-protein coupled receptor signaling pathway;GO:0009181//purine ribonucleoside diphosphate catabolic process;GO:0030168//platelet activation	K01509//adenosinetriphosphatase [EC:3.6.1.3]	gi|770075476|ref|NP_990285.2|//ectonucleoside triphosphate diphosphohydrolase 2 precursor [Gallus gallus]
396221	1721	5385.33	2064.5	-1.37141	0	Down	0	LDHA	GO:0005829//cytosol	GO:0004459//L-lactate dehydrogenase activity	GO:0006090//pyruvate metabolic process;GO:0005975//carbohydrate metabolic process;GO:0055114//oxidation-reduction process	K00016//L-lactate dehydrogenase [EC:1.1.1.27]	gi|971397363|ref|XP_015142066.1|//PREDICTED: L-lactate dehydrogenase A chain isoform X1 [Gallus gallus];gi|45384208|ref|NP_990615.1|//L-lactate dehydrogenase A chain [Gallus gallus]
769167	1129	4857	1754	-1.45759	0	Down	0	CYSTM1	GO:0016021//integral component of membrane	NA	NA	NA	gi|513206025|ref|XP_001232391.3|//PREDICTED: cysteine-rich and transmembrane domain-containing protein 1, partial [Gallus gallus]
373900	2666	7592	3535	-1.09094	0	Down	0	UGP2	NA	NA	NA	K00963//UTP--glucose-1-phosphate uridylyltransferase [EC:2.7.7.9]	gi|874507202|ref|NP_989442.2|//UTP--glucose-1-phosphate uridylyltransferase [Gallus gallus]
428888	6087	3944	1228	-1.67152	0	Down	0	LTBP2	NA	NA	NA	K08023//latent transforming growth factor beta binding protein 2/3/4	gi|971399859|ref|XP_015143162.1|//PREDICTED: latent-transforming growth factor beta-binding protein 2 isoform X1 [Gallus gallus];gi|971399861|ref|XP_015143163.1|//PREDICTED: latent-transforming growth factor beta-binding protein 2 isoform X2 [Gallus gallus];gi|971399863|ref|XP_015143165.1|//PREDICTED: latent-transforming growth factor beta-binding protein 2 isoform X3 [Gallus gallus]
419422	3380	1588	113	-3.80099	0	Down	0	FAM132A	GO:0005615//extracellular space	GO:0005179//hormone activity	GO:0046326//positive regulation of glucose import;GO:0051897//positive regulation of protein kinase B signaling;GO:0035774//positive regulation of insulin secretion involved in cellular response to glucose stimulus;GO:0046628//positive regulation of insulin receptor signaling pathway;GO:0045721//negative regulation of gluconeogenesis;GO:0050728//negative regulation of inflammatory response	NA	gi|513219689|ref|XP_004947479.1|//PREDICTED: adipolin [Gallus gallus]
417831	1873	17	1362	6.33588	0	Up	0	WIF1	NA	NA	NA	K01691//WNT inhibitory factor 1	gi|770075600|ref|NP_001186536.2|//wnt inhibitory factor 1 precursor [Gallus gallus]
101749102	3197	2095	311	-2.74013	0	Down	0	DSCR6	NA	NA	NA	NA	gi|513162815|ref|XP_004934600.1|//PREDICTED: protein ripply3 [Gallus gallus]
770795	1180	1833	220	-3.0468	0	Down	0	AMBP	NA	NA	NA	K01830//prostaglandin-H2 D-isomerase [EC:5.3.99.2]	gi|478732996|ref|NP_001264627.1|//protein AMBP precursor [Gallus gallus]
420301	921	422	2283	2.44745	0	Up	0	LOC420301	NA	NA	NA	K06846//lymphocyte antigen 6 complex locus protein D/E/G6/H	gi|50731912|ref|XP_418413.1|//PREDICTED: lymphocyte antigen 6E [Gallus gallus]
107054818	2300	197.49	1693.54	3.11202	2.16579e-293	Up	1.46227e-294	LOC107054818	NA	NA	NA	NA	gi|971427234|ref|XP_015151781.1|//PREDICTED: protein MANBAL-like isoform X2 [Gallus gallus];gi|971427258|ref|XP_015151787.1|//PREDICTED: uncharacterized protein LOC107054817 [Gallus gallus];gi|971427232|ref|XP_015151780.1|//PREDICTED: uncharacterized protein LOC431205 isoform X1 [Gallus gallus]
776223	3039	5012.15	1983.63	-1.32546	3.31919e-290	Down	2.25335e-291	SMPDL3A	NA	NA	NA	K01128//sphingomyelin phosphodiesterase acid-like 3 [EC:3.1.4.-]	gi|363732289|ref|XP_001235757.2|//PREDICTED: acid sphingomyelinase-like phosphodiesterase 3a [Gallus gallus]
420262	1741	2384	494	-2.25897	4.17993e-290	Down	2.84546e-291	CTHRC1	NA	NA	NA	K13649//folate receptor;K19721//collagen, type V/XI/XXIV/XXVII, alpha;K16364//GLDN; gliomedin	gi|971384767|ref|XP_418373.4|//PREDICTED: collagen triple helix repeat-containing protein 1 [Gallus gallus]
100859106	1828	1269.93	10.9	-6.85245	2.08452e-289	Down	1.4229e-290	LOC100859106	NA	NA	NA	K19364//magnesium transporter NIPA1	gi|363728605|ref|XP_003640521.1|//PREDICTED: uncharacterized protein LOC100859106 [Gallus gallus]
396080	854	1409	100	-3.80477	1.10783e-284	Down	7.62392e-286	SPP2	GO:0070062//extracellular exosome;GO:0016021//integral component of membrane	NA	GO:0046849//bone remodeling	NA	gi|94400858|ref|NP_990499.3|//secreted phosphoprotein 24 [Gallus gallus];gi|971404007|ref|XP_015144613.1|//PREDICTED: secreted phosphoprotein 24 isoform X1 [Gallus gallus]
415895	1772	2671	5947	1.16661	3.37929e-284	Up	2.33186e-285	NT5DC2	NA	NA	NA	K01081//5'-nucleotidase [EC:3.1.3.5]	gi|971415338|ref|XP_015148240.1|//PREDICTED: 5'-nucleotidase domain-containing protein 2 isoform X2 [Gallus gallus];gi|363738478|ref|XP_414247.3|//PREDICTED: 5'-nucleotidase domain-containing protein 2 isoform X1 [Gallus gallus]
100859610	4230	6596.82	3080.13	-1.08695	4.6416e-279	Down	3.26334e-280	CREB3L1	NA	NA	NA	K09048//cyclic AMP-responsive element-binding protein 3	gi|971398869|ref|XP_003641438.2|//PREDICTED: cyclic AMP-responsive element-binding protein 3-like protein 1 isoform X2 [Gallus gallus];gi|971398867|ref|XP_004941667.2|//PREDICTED: cyclic AMP-responsive element-binding protein 3-like protein 1 isoform X1 [Gallus gallus];gi|971398873|ref|XP_015142723.1|//PREDICTED: cyclic AMP-responsive element-binding protein 3-like protein 1 isoform X4 [Gallus ga…
769673	3647	301.02	1867.06	2.64467	9.32142e-275	Up	6.64024e-276	ERNI	NA	NA	NA	NA	gi|124249438|ref|NP_001074343.1|//uncharacterized protein LOC769673 [Gallus gallus]
415588	12873	4130.72	1499.1	-1.45047	2.4251e-274	Down	1.73206e-275	MAP1A	NA	NA	NA	K10429//microtubule-associated protein 1	gi|971413363|ref|XP_015147624.1|//PREDICTED: microtubule-associated protein 1A isoform X2 [Gallus gallus];gi|971413361|ref|XP_015147623.1|//PREDICTED: microtubule-associated protein 1A isoform X1 [Gallus gallus]
424451	4956	6713.26	3201.99	-1.05621	4.56279e-271	Down	3.30977e-272	FAM129A	NA	NA	NA	NA	gi|971407020|ref|XP_015145793.1|//PREDICTED: protein Niban isoform X1 [Gallus gallus];gi|971407022|ref|XP_015145794.1|//PREDICTED: protein Niban isoform X2 [Gallus gallus];gi|60302834|ref|NP_001012614.1|//protein Niban [Gallus gallus]
417601	996	2262	5232	1.22159	4.71666e-269	Up	3.44771e-270	CENPV	NA	NA	NA	NA	gi|118100257|ref|XP_415846.2|//PREDICTED: centromere protein V [Gallus gallus]
107054378	1999	1382.37	114.96	-3.57611	3.52273e-267	Down	2.59464e-268	LOC107054378	NA	NA	NA	K03910//alpha-2-macroglobulin	gi|971373688|ref|XP_015148553.1|//PREDICTED: alpha-2-macroglobulin-like, partial [Gallus gallus]
770588	3699	1343	102	-3.70699	1.49051e-266	Down	1.10337e-267	HRG	NA	NA	NA	NA	gi|971410987|ref|XP_001233925.3|//PREDICTED: histidine-rich glycoprotein [Gallus gallus]
423592	3635	1028	3238	1.66709	9.42989e-266	Up	6.99814e-267	DDHD1	NA	NA	NA	K13619//phospholipase DDHD1 [EC:3.1.1.-]	gi|971400907|ref|XP_015132265.1|//PREDICTED: phospholipase DDHD1 [Gallus gallus]
395219	1676	515	2280	2.15822	1.53649e-264	Up	1.14884e-265	SOCS2	GO:0005737//cytoplasm	GO:0004860//protein kinase inhibitor activity;GO:0008269//JAK pathway signal transduction adaptor activity;GO:0005159//insulin-like growth factor receptor binding	GO:0001558//regulation of cell growth;GO:0006469//negative regulation of protein kinase activity;GO:0046627//negative regulation of insulin receptor signaling pathway;GO:0032355//response to estradiol;GO:0060396//growth hormone receptor signaling pathway;GO:0016567//protein ubiquitination;GO:0046426//negative regulation of JAK-STAT cascade;GO:0019221//cytokine-mediated signaling pathway	K04695//suppressor of cytokine signaling 2	gi|45383099|ref|NP_989871.1|//suppressor of cytokine signaling 2 [Gallus gallus]
100859134	1060	3277.89	1053.9	-1.6252	2.42396e-257	Down	1.85749e-258	LOC100859134	GO:0042612//MHC class I protein complex	GO:0042605//peptide antigen binding	GO:0006955//immune response;GO:0002474//antigen processing and presentation of peptide antigen via MHC class I	K06751//major histocompatibility complex, class I	gi|971422421|ref|XP_015150547.1|//PREDICTED: class I histocompatibility antigen, F10 alpha chain-like isoform X6 [Gallus gallus];gi|971422419|ref|XP_015150546.1|//PREDICTED: class I histocompatibility antigen, F10 alpha chain-like isoform X5 [Gallus gallus];gi|971422429|ref|XP_015150551.1|//PREDICTED: class I histocompatibility antigen, F10 alpha chain-like isoform X10 [Gallus gallus];gi|97142243…
428268	6196	1267.46	3594.47	1.51567	4.86464e-257	Up	3.73684e-258	LAMB3	GO:0005610//laminin-5 complex	NA	GO:0050873//brown fat cell differentiation;GO:0035987//endodermal cell differentiation	K06244//laminin, beta 3	gi|513224845|ref|XP_425827.3|//PREDICTED: laminin subunit beta-3 [Gallus gallus]
395839	4758	727	2650	1.8778	1.46102e-256	Up	1.12502e-257	GFRA4	GO:0070062//extracellular exosome;GO:0005886//plasma membrane;GO:0031225//anchored component of membrane	GO:0004872//receptor activity	GO:0030279//negative regulation of ossification	K19895//GDNF family receptor alpha 1	gi|45384502|ref|NP_990322.1|//GDNF family receptor alpha-4 precursor [Gallus gallus];gi|971396197|ref|XP_015141526.1|//PREDICTED: GDNF family receptor alpha-4 isoform X2 [Gallus gallus];gi|971396195|ref|XP_015141525.1|//PREDICTED: GDNF family receptor alpha-4 isoform X1 [Gallus gallus]
428772	3134	2520	648	-1.94753	4.37223e-254	Down	3.38298e-255	ELOVL6	GO:0030176//integral component of endoplasmic reticulum membrane	GO:0016747//transferase activity, transferring acyl groups other than amino-acyl groups	GO:0019367//fatty acid elongation, saturated fatty acid;GO:0042759//long-chain fatty acid biosynthetic process	K10203//elongation of very long chain fatty acids protein 6 [EC:2.3.1.199]	gi|71895875|ref|NP_001026710.1|//elongation of very long chain fatty acids protein 6 [Gallus gallus]
417342	3575	1774	4368	1.3118	3.86412e-251	Up	3.01139e-252	C18H17ORF62	GO:0016021//integral component of membrane	NA	NA	NA	gi|971424392|ref|XP_015150756.1|//PREDICTED: uncharacterized protein C17orf62 homolog isoform X2 [Gallus gallus];gi|50757685|ref|XP_415607.1|//PREDICTED: uncharacterized protein C17orf62 homolog isoform X1 [Gallus gallus]
418639	1613	1702.54	267.21	-2.65981	3.59842e-250	Down	2.8244e-251	PRPS2	GO:0070062//extracellular exosome	GO:0000287//magnesium ion binding;GO:0004749//ribose phosphate diphosphokinase activity;GO:0005524//ATP binding;GO:0016301//kinase activity;GO:0042803//protein homodimerization activity	GO:0016310//phosphorylation;GO:0009165//nucleotide biosynthetic process;GO:0006015//5-phosphoribose 1-diphosphate biosynthetic process;GO:0009156//ribonucleoside monophosphate biosynthetic process	K00948//ribose-phosphate pyrophosphokinase [EC:2.7.6.1]	gi|733873609|ref|XP_010724789.1|//PREDICTED: ribose-phosphate pyrophosphokinase 2 isoform X2 [Meleagris gallopavo];gi|57525515|ref|NP_001006264.1|//ribose-phosphate pyrophosphokinase 2 [Gallus gallus]
424440	1804	1529	196	-2.95183	4.4515e-250	Down	3.50227e-251	SERPINC1	NA	NA	NA	K03911//antithrombin III	gi|363736402|ref|XP_422282.3|//PREDICTED: antithrombin-III [Gallus gallus]
428717	6232	2566	5545	1.1235	1.22096e-249	Up	9.62874e-251	GAB3	NA	NA	NA	K08091//growth factor receptor bound protein 2-associated protein 2	gi|513181303|ref|XP_004940877.1|//PREDICTED: GRB2-associated-binding protein 3 isoform X1 [Gallus gallus];gi|971392354|ref|XP_015134107.1|//PREDICTED: GRB2-associated-binding protein 3 isoform X3 [Gallus gallus];gi|513181306|ref|XP_004940878.1|//PREDICTED: GRB2-associated-binding protein 3 isoform X2 [Gallus gallus];gi|513181317|ref|XP_004940880.1|//PREDICTED: GRB2-associated-binding protein 3 is…
423158	2885	2217	5026	1.19263	6.06026e-249	Up	4.79053e-250	PAMR1	NA	NA	NA	K17495//CUB and sushi domain-containing protein;K03992//mannan-binding lectin serine protease 1 [EC:3.4.21.-]	gi|513187084|ref|XP_421084.3|//PREDICTED: inactive serine protease PAMR1 isoform X1 [Gallus gallus]
418167	2600	4450.75	1803.53	-1.29139	9.65214e-248	Down	7.66575e-249	USP18	NA	GO:0036459//thiol-dependent ubiquitinyl hydrolase activity;GO:0019785//ISG15-specific protease activity	GO:0006511//ubiquitin-dependent protein catabolic process;GO:0035634//response to stilbenoid;GO:0016579//protein deubiquitination	K11846//ubiquitin carboxyl-terminal hydrolase 18/41 [EC:3.4.19.12]	gi|513160274|ref|XP_004938015.1|//PREDICTED: ubl carboxyl-terminal hydrolase 18 isoform X1 [Gallus gallus];gi|513160277|ref|XP_416398.3|//PREDICTED: ubl carboxyl-terminal hydrolase 18 isoform X2 [Gallus gallus]
769424	1259	2179	4959	1.19821	1.84449e-247	Up	1.47176e-248	PPA1	NA	NA	NA	K01507//inorganic pyrophosphatase [EC:3.6.1.1]	gi|118092623|ref|XP_001232700.1|//PREDICTED: inorganic pyrophosphatase [Gallus gallus]
100857569	2750	3171.32	6394.46	1.02357	2.17388e-247	Up	1.73863e-248	LOC100857569	GO:0016021//integral component of membrane	NA	NA	K06502//CD69 antigen;K10072//C-type lectin domain family 2 member D	gi|971447226|ref|XP_015128578.1|//PREDICTED: C-type lectin domain family 2 member B-like [Gallus gallus]
429272	3819	1058.78	3136.34	1.57851	3.99884e-238	Up	3.28745e-239	MYO7L2	NA	NA	NA	K17751//myosin heavy chain 6/7	gi|971449219|ref|XP_015129391.1|//PREDICTED: myosin-7, partial [Gallus gallus]
769087	2964	3940	1526	-1.35661	1.12936e-236	Down	9.30551e-238	ANGPTL4	NA	NA	NA	K08767//angiopoietin-like 4	gi|971435838|ref|XP_001232284.3|//PREDICTED: angiopoietin-related protein 4 [Gallus gallus]
427652	1717	1504	3843	1.36526	4.9939e-235	Up	4.13336e-236	LOC427652	GO:0005622//intracellular	NA	GO:0006810//transport	NA	gi|363739695|ref|XP_003642209.1|//PREDICTED: cytoplasmic phosphatidylinositol transfer protein 1-like isoform X2 [Gallus gallus];gi|513209328|ref|XP_004945471.1|//PREDICTED: cytoplasmic phosphatidylinositol transfer protein 1-like isoform X1 [Gallus gallus]
395306	3005	1392	167	-3.04741	7.8362e-235	Down	6.50045e-236	F2	GO:0070062//extracellular exosome;GO:0072562//blood microparticle;GO:0005829//cytosol	GO:0004252//serine-type endopeptidase activity;GO:0005509//calcium ion binding;GO:0005102//receptor binding;GO:0070053//thrombospondin receptor activity	GO:0010468//regulation of gene expression;GO:0048712//negative regulation of astrocyte differentiation;GO:0045861//negative regulation of proteolysis;GO:0007166//cell surface receptor signaling pathway;GO:0030168//platelet activation;GO:0030307//positive regulation of cell growth;GO:0032967//positive regulation of collagen biosynthetic process;GO:0001934//positive regulation of protein phosphoryl…	K01313//coagulation factor II (thrombin) [EC:3.4.21.5]	gi|45382957|ref|NP_989936.1|//prothrombin precursor [Gallus gallus]
424220	2051	2421	5220	1.12028	5.17538e-234	Up	4.32207e-235	IGFBP5	NA	NA	NA	K10138//insulin-like growth factor-binding protein 3	gi|971406459|ref|XP_422069.4|//PREDICTED: insulin-like growth factor-binding protein 5 [Gallus gallus]
100859699	3567	1176	92	-3.66428	1.19094e-231	Down	1.00566e-232	TMEM72	NA	NA	NA	NA	gi|363735227|ref|XP_003641527.1|//PREDICTED: transmembrane protein 72 [Gallus gallus]
101749459	4785	2357.05	5062	1.11456	4.08817e-225	Up	3.51297e-226	ARID5A	GO:0005634//nucleus	GO:0044212//transcription regulatory region DNA binding	GO:0006357//regulation of transcription from RNA polymerase II promoter	K06676//condensin complex subunit 2;K07874//Ras-related protein Rab-1A;K00844//hexokinase [EC:2.7.1.1]	gi|971430142|ref|XP_015152937.1|//PREDICTED: AT-rich interactive domain-containing protein 5A isoform X2 [Gallus gallus];gi|971430140|ref|XP_015152936.1|//PREDICTED: AT-rich interactive domain-containing protein 5A isoform X1 [Gallus gallus]
426948	9725	5504	2614	-1.06239	1.31271e-224	Down	1.13045e-225	LZTS3	GO:0014069//postsynaptic density	NA	NA	NA	gi|513185458|ref|XP_004936339.1|//PREDICTED: leucine zipper putative tumor suppressor 3 isoform X2 [Gallus gallus];gi|363733671|ref|XP_420876.3|//PREDICTED: leucine zipper putative tumor suppressor 3 isoform X1 [Gallus gallus]
395611	992	4070.39	1664.48	-1.27827	3.88555e-223	Down	3.36053e-224	LOC395611	GO:0005829//cytosol	GO:0004364//glutathione transferase activity	GO:0098754//detoxification;GO:0043390//aflatoxin B1 metabolic process	K00799//glutathione S-transferase [EC:2.5.1.18]	gi|971390075|ref|XP_015140398.1|//PREDICTED: glutathione S-transferase [Gallus gallus]
424960	5006	2437	689	-1.8107	6.81687e-223	Down	5.90845e-224	B3GNT5	NA	NA	NA	K03766//beta-1,3-N-acetylglucosaminyltransferase 5 [EC:2.4.1.206]	gi|166157484|ref|NP_001107233.1|//lactosylceramide 1,3-N-acetyl-beta-D-glucosaminyltransferase [Gallus gallus]
424037	3126	2122	527	-1.99772	1.99853e-221	Down	1.73964e-222	LSS	NA	NA	NA	K01852//lanosterol synthase [EC:5.4.99.7]	gi|408358018|ref|NP_001006514.2|//lanosterol synthase [Gallus gallus]
768618	3173	4618	2033	-1.17183	9.12848e-221	Down	7.99691e-222	NDRG4	NA	NA	NA	K18266//protein NDRG1	gi|971413830|ref|XP_001231665.4|//PREDICTED: protein NDRG4 isoform X1 [Gallus gallus];gi|971413832|ref|XP_004944070.2|//PREDICTED: protein NDRG4 isoform X2 [Gallus gallus];gi|513202480|ref|XP_004944071.1|//PREDICTED: protein NDRG4 isoform X5 [Gallus gallus];gi|363737958|ref|XP_003641929.1|//PREDICTED: protein NDRG4 isoform X4 [Gallus gallus]
107056092	2303	5462.85	2614.37	-1.05136	3.39606e-219	Down	2.99403e-220	LOC107056092	NA	NA	NA	K01128//sphingomyelin phosphodiesterase acid-like 3 [EC:3.1.4.-]	gi|363732289|ref|XP_001235757.2|//PREDICTED: acid sphingomyelinase-like phosphodiesterase 3a [Gallus gallus]
426312	6046	3707	1452	-1.34038	1.02429e-218	Down	9.04936e-220	SULF1	GO:0005795//Golgi stack;GO:0005615//extracellular space;GO:0005783//endoplasmic reticulum;GO:0009986//cell surface;GO:0045121//membrane raft;GO:0005886//plasma membrane	GO:0004065//arylsulfatase activity;GO:0005509//calcium ion binding;GO:0008449//N-acetylglucosamine-6-sulfatase activity	GO:0030201//heparan sulfate proteoglycan metabolic process;GO:0001822//kidney development;GO:0003094//glomerular filtration;GO:0032836//glomerular basement membrane development;GO:0010575//positive regulation of vascular endothelial growth factor production;GO:0002063//chondrocyte development;GO:0030513//positive regulation of BMP signaling pathway;GO:0036022//limb joint morphogenesis;GO:0035860/…	K14607//extracellular sulfatase Sulf [EC:3.1.6.-]	gi|971384553|ref|XP_015138388.1|//PREDICTED: extracellular sulfatase Sulf-1 isoform X2 [Gallus gallus];gi|971384549|ref|XP_015138387.1|//PREDICTED: extracellular sulfatase Sulf-1 isoform X1 [Gallus gallus]
424381	1770	1407	202	-2.78837	1.69371e-217	Down	1.50581e-218	PHGDH	NA	NA	NA	K00058//D-3-phosphoglycerate dehydrogenase [EC:1.1.1.95]	gi|971407303|ref|XP_422226.3|//PREDICTED: D-3-phosphoglycerate dehydrogenase [Gallus gallus]
428824	4747	43	967	4.50294	5.86389e-217	Up	5.22426e-218	LOC428824	NA	NA	NA	K01187//alpha-glucosidase [EC:3.2.1.20];K05546//alpha 1,3-glucosidase [EC:3.2.1.84]	gi|971396711|ref|XP_015141754.1|//PREDICTED: SITS-binding protein-like isoform X2 [Gallus gallus];gi|118091056|ref|XP_426381.2|//PREDICTED: SITS-binding protein-like isoform X1 [Gallus gallus]
418579	1806	2746	5553	1.02777	1.85001e-216	Up	1.65165e-217	SRPX	NA	NA	NA	K19408//sushi repeat-containing protein SRPX2	gi|513163226|ref|XP_004934675.1|//PREDICTED: sushi repeat-containing protein SRPX isoform X2 [Gallus gallus];gi|513163223|ref|XP_416781.4|//PREDICTED: sushi repeat-containing protein SRPX isoform X1 [Gallus gallus];gi|513163220|ref|XP_004934674.1|//PREDICTED: sushi repeat-containing protein SRPX isoform X3 [Gallus gallus]
423260	17080	3314.03	1220.27	-1.42956	1.15596e-215	Down	1.03417e-216	PLEKHD1	NA	NA	NA	NA	gi|971399554|ref|XP_015143073.1|//PREDICTED: pleckstrin homology domain-containing family D member 1 isoform X4 [Gallus gallus];gi|363734721|ref|XP_421181.3|//PREDICTED: pleckstrin homology domain-containing family D member 1 isoform X3 [Gallus gallus];gi|971399549|ref|XP_015143071.1|//PREDICTED: pleckstrin homology domain-containing family D member 1 isoform X1 [Gallus gallus];gi|971399551|ref|X…
378797	1051	3974	1638	-1.26683	7.09253e-215	Down	6.35845e-216	GJB1	GO:0005922//connexin complex;GO:0016021//integral component of membrane;GO:0005737//cytoplasm	GO:0042803//protein homodimerization activity	GO:0007154//cell communication	K07620//gap junction protein, beta 1	gi|45383418|ref|NP_989702.1|//gap junction beta-1 protein [Gallus gallus]
418378	4101	5074	2375	-1.08337	7.92936e-214	Down	7.15291e-215	COL8A1	GO:0043231//intracellular membrane-bounded organelle;GO:0070062//extracellular exosome;GO:0005581//collagen trimer;GO:0005604//basement membrane	NA	GO:0048593//camera-type eye morphogenesis;GO:0050673//epithelial cell proliferation;GO:0001525//angiogenesis;GO:0035987//endodermal cell differentiation;GO:0010811//positive regulation of cell-substrate adhesion	K19479//collagen, type X, alpha	gi|642945623|ref|NP_001280063.1|//collagen alpha-1(VIII) chain precursor [Gallus gallus];gi|513161804|ref|XP_004938298.1|//PREDICTED: collagen alpha-1(VIII) chain isoform X1 [Gallus gallus]
424957	2619	1105	97	-3.49809	2.94092e-210	Down	2.67483e-211	KNG1	NA	NA	NA	K03898//kininogen	gi|118095251|ref|XP_422766.2|//PREDICTED: kininogen-1 [Gallus gallus]
396204	1976	1147	116	-3.29384	1.02398e-207	Down	9.35137e-209	NOV	GO:0043231//intracellular membrane-bounded organelle;GO:0005921//gap junction;GO:0005737//cytoplasm;GO:0005578//proteinaceous extracellular matrix	GO:0005520//insulin-like growth factor binding;GO:0008083//growth factor activity;GO:0005178//integrin binding;GO:0005112//Notch binding;GO:0008201//heparin binding	GO:0035767//endothelial cell chemotaxis;GO:0045747//positive regulation of Notch signaling pathway;GO:0014909//smooth muscle cell migration;GO:0033627//cell adhesion mediated by integrin;GO:0050728//negative regulation of inflammatory response;GO:0071603//endothelial cell-cell adhesion;GO:0090027//negative regulation of monocyte chemotaxis;GO:0048659//smooth muscle cell proliferation;GO:0030308//…	K06827//connective tissue growth factor	gi|46048721|ref|NP_990599.1|//protein NOV precursor [Gallus gallus]
416836	4145	2377	4953	1.07099	1.35923e-206	Up	1.24636e-207	HIP1R	NA	NA	NA	K20040//huntingtin-interacting protein 1-related protein	gi|71897195|ref|NP_001025828.1|//huntingtin-interacting protein 1-related protein [Gallus gallus] ;gi|971420773|ref|XP_015130763.1|//PREDICTED: huntingtin-interacting protein 1-related protein isoform X1 [Gallus gallus];gi|971420775|ref|XP_015130764.1|//PREDICTED: huntingtin-interacting protein 1-related protein isoform X2 [Gallus gallus]
430991	2222	57	957	4.08132	3.2276e-204	Up	2.97159e-205	ADRB3	GO:0016021//integral component of membrane;GO:0005886//plasma membrane;GO:0043235//receptor complex	GO:0031699//beta-3 adrenergic receptor binding;GO:0051380//norepinephrine binding;GO:0015052//beta3-adrenergic receptor activity;GO:0042803//protein homodimerization activity;GO:0004940//beta1-adrenergic receptor activity	GO:0031649//heat generation;GO:0002024//diet induced thermogenesis;GO:0009409//response to cold;GO:0045823//positive regulation of heart contraction;GO:0007190//activation of adenylate cyclase activity;GO:0071875//adrenergic receptor signaling pathway;GO:0050873//brown fat cell differentiation;GO:0043410//positive regulation of MAPK cascade;GO:0007189//adenylate cyclase-activating G-protein coupl…	K04141//adrenergic receptor beta-1	gi|513220632|ref|XP_428541.4|//PREDICTED: beta-3 adrenergic receptor [Gallus gallus]
100859188	5746	1551	290	-2.40724	5.20108e-204	Down	4.7982e-205	GPR132	GO:0016021//integral component of membrane	GO:0004930//G-protein coupled receptor activity	GO:0007186//G-protein coupled receptor signaling pathway;GO:0000082//G1/S transition of mitotic cell cycle;GO:0010972//negative regulation of G2/M transition of mitotic cell cycle	K08426//G protein-coupled receptor 132	gi|513189546|ref|XP_004936473.1|//PREDICTED: probable G-protein coupled receptor 132 [Gallus gallus]
768878	2194	1884	4212	1.17254	2.56252e-203	Up	2.37833e-204	ACVR1B	NA	NA	NA	K13567//activin receptor type-1B [EC:2.7.11.30]	gi|971436951|ref|XP_015155752.1|//PREDICTED: activin receptor type-1B isoform X1 [Gallus gallus]
427588	3284	2031	4428	1.1363	2.8314e-203	Up	2.63314e-204	KLF15	GO:0005634//nucleus	GO:0046872//metal ion binding;GO:0003700//transcription factor activity, sequence-specific DNA binding;GO:0044212//transcription regulatory region DNA binding	GO:0010001//glial cell differentiation;GO:0015758//glucose transport;GO:0014898//cardiac muscle hypertrophy in response to stress;GO:0045944//positive regulation of transcription from RNA polymerase II promoter;GO:2000757//negative regulation of peptidyl-lysine acetylation;GO:0072112//glomerular visceral epithelial cell differentiation	K09210//krueppel-like factor 15	gi|513205299|ref|XP_425161.3|//PREDICTED: Krueppel-like factor 15 isoform X1 [Gallus gallus];gi|513205302|ref|XP_004944662.1|//PREDICTED: Krueppel-like factor 15 isoform X2 [Gallus gallus]
423401	2139	3392	1319	-1.35086	1.23037e-202	Down	1.1488e-203	TTC8	NA	NA	NA	K16781//tetratricopeptide repeat protein 8	gi|971400046|ref|XP_421311.4|//PREDICTED: tetratricopeptide repeat protein 8 isoform X1 [Gallus gallus]
395258	878	1432	3509	1.30486	2.18882e-200	Up	2.05591e-201	IL15	GO:0005615//extracellular space;GO:0005654//nucleoplasm;GO:0005737//cytoplasm	GO:0005125//cytokine activity;GO:0005126//cytokine receptor binding	GO:0042102//positive regulation of T cell proliferation;GO:0032740//positive regulation of interleukin-17 production;GO:0032819//positive regulation of natural killer cell proliferation;GO:0045580//regulation of T cell differentiation;GO:0048535//lymph node development;GO:0048469//cell maturation;GO:1904100//positive regulation of protein O-linked glycosylation;GO:0045062//extrathymic T cell sele…	K05433//interleukin 15	gi|971392921|ref|XP_015131599.1|//PREDICTED: interleukin-15 isoform X2 [Gallus gallus];gi|45383037|ref|NP_989902.1|//interleukin-15 [Gallus gallus];gi|971392917|ref|XP_015131597.1|//PREDICTED: interleukin-15 isoform X1 [Gallus gallus]
396166	810	1081	104	-3.36588	1.95064e-199	Down	1.83945e-200	RBP4A	GO:0070062//extracellular exosome;GO:0005615//extracellular space;GO:0030136//clathrin-coated vesicle;GO:0060418//yolk plasma	GO:0019904//protein domain specific binding;GO:0016918//retinal binding;GO:0034632//retinol transporter activity;GO:0005102//receptor binding;GO:0019841//retinol binding	GO:0032024//positive regulation of insulin secretion;GO:0001654//eye development;GO:0006094//gluconeogenesis;GO:0042572//retinol metabolic process;GO:0032526//response to retinoic acid;GO:0043627//response to estrogen;GO:0042593//glucose homeostasis;GO:0001555//oocyte growth;GO:0034633//retinol transport;GO:0006461//protein complex assembly;GO:0009615//response to virus;GO:0033189//response to vi…	K18271//retinol-binding protein 4	gi|45382541|ref|NP_990569.1|//retinol-binding protein 4 precursor [Gallus gallus]
418125	6594	3147	1181	-1.40214	5.32234e-199	Down	5.03876e-200	PTN	NA	GO:0008083//growth factor activity	NA	K16642//pleiotrophin	gi|444741724|ref|NP_001263291.1|//pleiotrophin precursor [Gallus gallus]
421369	2793	2016	533	-1.90746	4.98858e-198	Down	4.75062e-199	ATF3	GO:0005730//nucleolus;GO:1990622//CHOP-ATF3 complex	GO:0000978//RNA polymerase II core promoter proximal region sequence-specific DNA binding;GO:0046982//protein heterodimerization activity;GO:0042803//protein homodimerization activity;GO:0001078//transcriptional repressor activity, RNA polymerase II core promoter proximal region sequence-specific binding	GO:0034198//cellular response to amino acid starvation;GO:1903984//positive regulation of TRAIL-activated apoptotic signaling pathway;GO:0006094//gluconeogenesis;GO:1990440//positive regulation of transcription from RNA polymerase II promoter in response to endoplasmic reticulum stress;GO:0070373//negative regulation of ERK1 and ERK2 cascade;GO:0000122//negative regulation of transcription from R…	K09032//activating transcription factor 3	gi|326915193|ref|XP_003203904.1|//PREDICTED: cyclic AMP-dependent transcription factor ATF-3 [Meleagris gallopavo]
427942	4450	941.74	57	-4.03446	5.24909e-198	Down	5.00846e-199	A2ML2	NA	NA	NA	K03910//alpha-2-macroglobulin	gi|971373612|ref|XP_004938161.2|//PREDICTED: alpha-2-macroglobulin-like protein 1 isoform X1 [Gallus gallus];gi|971373614|ref|XP_004938162.2|//PREDICTED: alpha-2-macroglobulin-like protein 1 isoform X2 [Gallus gallus];gi|971373616|ref|XP_004938163.2|//PREDICTED: alpha-2-macroglobulin-like protein 1 isoform X3 [Gallus gallus]
107056031	1935	1239.06	167.19	-2.87786	6.34645e-198	Down	6.06732e-199	LOC107056031	NA	NA	NA	NA	gi|971383605|ref|XP_015133436.1|//PREDICTED: LOW QUALITY PROTEIN: EMILIN-2 [Gallus gallus]
419110	2923	1139	132	-3.09733	2.48298e-195	Down	2.39687e-196	ITIH2	GO:0070062//extracellular exosome;GO:0072562//blood microparticle	GO:0004867//serine-type endopeptidase inhibitor activity	GO:0010951//negative regulation of endopeptidase activity;GO:0030212//hyaluronan metabolic process	K19015//inter-alpha-trypsin inhibitor heavy chain H2	gi|195539501|ref|NP_001124213.1|//inter-alpha-trypsin inhibitor heavy chain H2 precursor [Gallus gallus]
419848	2624	978.4	73.74	-3.71808	5.519e-195	Down	5.33786e-196	PIGR	NA	NA	NA	K13073//polymeric immunoglobulin receptor	gi|153792243|ref|NP_001038109.1|//polymeric immunoglobulin receptor precursor [Gallus gallus];gi|971433706|ref|XP_015154414.1|//PREDICTED: polymeric immunoglobulin receptor isoform X1 [Gallus gallus]
419953	4539	3932	1703	-1.19535	3.54876e-194	Down	3.45208e-195	ACE	GO:0016021//integral component of membrane	GO:0004180//carboxypeptidase activity;GO:0008241//peptidyl-dipeptidase activity;GO:0046872//metal ion binding;GO:0008237//metallopeptidase activity	GO:0006508//proteolysis	K01283//peptidyl-dipeptidase A [EC:3.4.15.1]	gi|268370291|ref|NP_001161204.1|//angiotensin-converting enzyme precursor [Gallus gallus]
100857298	1819	1901	487	-1.95293	1.01332e-192	Down	9.89484e-194	LOC100857298	NA	NA	NA	K01084//glucose-6-phosphatase [EC:3.1.3.9]	gi|363743532|ref|XP_003642865.1|//PREDICTED: glucose-6-phosphatase [Gallus gallus]
423372	4115	5077	2492	-1.01484	2.12974e-192	Down	2.08757e-193	TMEM63C	GO:0016021//integral component of membrane	GO:0005227//calcium activated cation channel activity	GO:0098655//cation transmembrane transport	K10165//nucleotide-binding oligomerization domain-containing protein 2	gi|971399975|ref|XP_015143205.1|//PREDICTED: calcium permeable stress-gated cation channel 1 [Gallus gallus]
768899	13658	3046.85	1147.4	-1.39712	1.11404e-191	Down	1.09612e-192	LRRC15	NA	NA	NA	K13023//carboxypeptidase N regulatory subunit	gi|971410904|ref|XP_004943388.2|//PREDICTED: uncharacterized protein LRRC15 [Gallus gallus]
427649	2501	2614	895	-1.53447	3.61285e-189	Down	3.60179e-190	IGFALS	NA	NA	NA	K17256//insulin-like growth factor-binding protein complex acid labile subunit	gi|363739705|ref|XP_425222.3|//PREDICTED: insulin-like growth factor-binding protein complex acid labile subunit isoform X2 [Gallus gallus];gi|513209279|ref|XP_004945462.1|//PREDICTED: insulin-like growth factor-binding protein complex acid labile subunit isoform X1 [Gallus gallus]
416507	1629	4741	2296	-1.03424	2.11094e-185	Down	2.14373e-186	RASD1	GO:0016020//membrane;GO:0016529//sarcoplasmic reticulum	GO:0005525//GTP binding	GO:0007264//small GTPase mediated signal transduction	K07843//RAS, dexamethasone-induced Ras-related protein 1	gi|113206066|ref|NP_001038101.1|//dexamethasone-induced Ras-related protein 1 [Gallus gallus]
420174	11804	318.9	1498.12	2.24381	7.92121e-183	Up	8.07374e-184	SLCO5A1	NA	NA	NA	K14356//solute carrier organic anion transporter family, member 5A	gi|971384555|ref|XP_015138390.1|//PREDICTED: solute carrier organic anion transporter family member 5A1 [Gallus gallus]
422830	5552	1797	3937	1.14334	1.10658e-182	Up	1.132e-183	RP11-690P14.4	NA	NA	NA	K19352//coiled-coil and C2 domain-containing protein 2A	gi|971395597|ref|XP_015141286.1|//PREDICTED: coiled-coil and C2 domain-containing protein 2A isoform X1 [Gallus gallus];gi|363733812|ref|XP_420777.3|//PREDICTED: coiled-coil and C2 domain-containing protein 2A isoform X2 [Gallus gallus]
395826	787	1987	560	-1.81526	1.27097e-182	Down	1.30253e-183	GREM1	GO:0005615//extracellular space;GO:0009986//cell surface	GO:0005125//cytokine activity;GO:0030297//transmembrane receptor protein tyrosine kinase activator activity;GO:0048018//receptor ligand activity;GO:0043184//vascular endothelial growth factor receptor 2 binding	GO:0007171//activation of transmembrane receptor protein tyrosine kinase activity;GO:2000273//positive regulation of receptor activity;GO:0010717//regulation of epithelial to mesenchymal transition;GO:0003257//positive regulation of transcription from RNA polymerase II promoter involved in myocardial precursor cell differentiation;GO:0030199//collagen fibril organization;GO:0002092//positive regu…	K19558//neuroblastoma suppressor of tumorigenicity 1;K01645//cerberus 1	gi|45384474|ref|NP_990309.1|//gremlin-1 precursor [Gallus gallus]
101749217	1218	1003	102	-3.28585	1.91302e-181	Down	1.9712e-182	P2RX2	NA	NA	NA	K05216//P2X purinoceptor 2	gi|971420910|ref|XP_004934477.2|//PREDICTED: P2X purinoceptor 2 [Gallus gallus]
414341	654	777	22	-5.13051	8.01802e-181	Down	8.29172e-182	AvBD10	GO:0005576//extracellular region	NA	GO:0050832//defense response to fungus;GO:0050829//defense response to Gram-negative bacterium;GO:0050830//defense response to Gram-positive bacterium	K21100//beta-defensin 4	gi|48976029|ref|NP_001001609.1|//gallinacin-10 preproprotein [Gallus gallus]
423365	3133	1184	2994	1.35024	2.29326e-180	Up	2.38007e-181	FLVCR2	NA	NA	NA	K08220//MFS transporter, FLVCR family, feline leukemia virus subgroup C receptor-related protein	gi|971399918|ref|XP_421280.4|//PREDICTED: feline leukemia virus subgroup C receptor-related protein 2 [Gallus gallus]
107051636	3485	1253.7	204.72	-2.60264	2.58352e-180	Down	2.68612e-181	LOC107051636	GO:0019028//viral capsid;GO:0019031//viral envelope;GO:0016021//integral component of membrane	GO:0008270//zinc ion binding;GO:0005198//structural molecule activity;GO:0003676//nucleic acid binding;GO:0004190//aspartic-type endopeptidase activity	GO:0006508//proteolysis;GO:0016032//viral process	K19364//magnesium transporter NIPA1;K06240//laminin, alpha 3/5	gi|971370600|ref|XP_015131296.1|//PREDICTED: uncharacterized protein LOC107051636 [Gallus gallus]
422423	1766	3973	1817	-1.11684	3.91179e-176	Down	4.1399e-177	MSMO1	GO:0016021//integral component of membrane;GO:0005789//endoplasmic reticulum membrane	GO:0000254//C-4 methylsterol oxidase activity;GO:0005506//iron ion binding	GO:0016126//sterol biosynthetic process;GO:0006633//fatty acid biosynthetic process;GO:0055114//oxidation-reduction process	K07750//methylsterol monooxygenase [EC:1.14.13.72]	gi|57530155|ref|NP_001006438.1|//methylsterol monooxygenase 1 [Gallus gallus]
395915	623	1143	166	-2.77174	7.14334e-176	Down	7.59977e-177	NME4	NA	NA	NA	K00940//nucleoside-diphosphate kinase [EC:2.7.4.6]	gi|533112515|ref|NP_001269146.1|//nucleoside diphosphate kinase, mitochondrial [Gallus gallus]
107050476	4017	1493.2	323.78	-2.19349	8.00018e-176	Down	8.52623e-177	LOC107050476	GO:0019028//viral capsid;GO:0019031//viral envelope;GO:0016021//integral component of membrane	GO:0008270//zinc ion binding;GO:0005198//structural molecule activity;GO:0003676//nucleic acid binding;GO:0004190//aspartic-type endopeptidase activity	GO:0006508//proteolysis;GO:0016032//viral process	K19364//magnesium transporter NIPA1;K06240//laminin, alpha 3/5	gi|971377055|ref|XP_015129708.1|//PREDICTED: uncharacterized protein LOC107050476 [Gallus gallus]
107049346	1903	167.28	1132.57	2.77109	1.15791e-175	Up	1.23621e-176	LOC107049346	GO:0005840//ribosome;GO:0005739//mitochondrion	GO:0003735//structural constituent of ribosome	GO:0006412//translation	K17409//small subunit ribosomal protein S30	gi|971446437|ref|XP_015128219.1|//PREDICTED: 28S ribosomal protein S30, mitochondrial-like [Gallus gallus]
416537	1700	4292.65	2040.27	-1.06128	3.40644e-175	Down	3.64944e-176	HAGH	GO:0005759//mitochondrial matrix;GO:0070062//extracellular exosome	GO:0046872//metal ion binding;GO:0004416//hydroxyacylglutathione hydrolase activity	GO:0019853//L-ascorbic acid biosynthetic process;GO:0019243//methylglyoxal catabolic process to D-lactate via S-lactoyl-glutathione;GO:0006750//glutathione biosynthetic process	K01069//hydroxyacylglutathione hydrolase [EC:3.1.2.6]	gi|61098280|ref|NP_001012807.1|//hydroxyacylglutathione hydrolase, mitochondrial precursor [Gallus gallus];gi|971418795|ref|XP_015149679.1|//PREDICTED: hydroxyacylglutathione hydrolase, mitochondrial isoform X1 [Gallus gallus]
423628	2057	1017	117	-3.10791	4.07635e-175	Down	4.37471e-176	MAT1A	NA	NA	NA	K00789//S-adenosylmethionine synthetase [EC:2.5.1.6]	gi|313760551|ref|NP_001186448.1|//S-adenosylmethionine synthase isoform type-1 [Gallus gallus]
424682	8488	1405	287	-2.27962	1.89473e-173	Down	2.04046e-174	INADL	GO:0070062//extracellular exosome;GO:0005923//bicellular tight junction;GO:0045177//apical part of cell;GO:0048471//perinuclear region of cytoplasm	NA	NA	K06092//InaD-like protein	gi|513198352|ref|XP_004936911.1|//PREDICTED: inaD-like protein isoform X8 [Gallus gallus];gi|513198346|ref|XP_004936909.1|//PREDICTED: inaD-like protein isoform X3 [Gallus gallus];gi|513198349|ref|XP_004936910.1|//PREDICTED: inaD-like protein isoform X4 [Gallus gallus];gi|971409073|ref|XP_015146639.1|//PREDICTED: inaD-like protein isoform X6 [Gallus gallus];gi|971409059|ref|XP_015146633.1|//PREDI…
768337	3511	4635.57	2288.83	-1.00631	2.1951e-173	Down	2.36802e-174	TUBB2A	GO:0070062//extracellular exosome;GO:0005634//nucleus;GO:0005874//microtubule;GO:0005737//cytoplasm	GO:0005515//protein binding;GO:0005200//structural constituent of cytoskeleton;GO:0005525//GTP binding;GO:0003924//GTPase activity	GO:0001764//neuron migration;GO:0007017//microtubule-based process	K07375//tubulin beta	gi|971382460|ref|XP_001231210.3|//PREDICTED: tubulin beta chain-like [Gallus gallus]
771367	1444	3510.58	1537.41	-1.17938	6.98056e-170	Down	7.64731e-171	METTL5	NA	GO:0008168//methyltransferase activity;GO:0003676//nucleic acid binding	GO:0032259//methylation	K07579//putative methylase	gi|513194205|ref|XP_004942812.1|//PREDICTED: methyltransferase-like protein 5 isoform X1 [Gallus gallus];gi|118093593|ref|XP_001233695.1|//PREDICTED: methyltransferase-like protein 5 isoform X2 [Gallus gallus]
423629	1238	764	35	-4.43632	3.42175e-169	Down	3.75495e-170	LOC423629	NA	NA	NA	NA	gi|50749164|ref|XP_421513.1|//PREDICTED: uncharacterized protein LOC423629 [Gallus gallus]
107049309	3462	1796.09	496.49	-1.84319	1.14213e-168	Down	1.25759e-169	LOC107049309	GO:0005654//nucleoplasm;GO:0005737//cytoplasm;GO:0005886//plasma membrane	GO:0004421//hydroxymethylglutaryl-CoA synthase activity	GO:0008299//isoprenoid biosynthetic process;GO:0006695//cholesterol biosynthetic process	K01641//hydroxymethylglutaryl-CoA synthase [EC:2.3.3.10]	gi|971437459|ref|XP_015132741.1|//PREDICTED: hydroxymethylglutaryl-CoA synthase, cytoplasmic isoform X2 [Gallus gallus];gi|971446305|ref|XP_015128156.1|//PREDICTED: hydroxymethylglutaryl-CoA synthase, cytoplasmic isoform X1 [Gallus gallus]
418251	4160	864.99	72.03	-3.57418	1.18895e-167	Down	1.31578e-168	A2M	NA	NA	NA	K03910//alpha-2-macroglobulin	gi|971373602|ref|XP_015148167.1|//PREDICTED: alpha-2-macroglobulin [Gallus gallus]
427150	2697	4234	2043	-1.0395	4.19455e-167	Down	4.65761e-168	PLK2	NA	NA	NA	K08861//polo-like kinase 2 [EC:2.7.11.21]	gi|118103791|ref|XP_424739.2|//PREDICTED: serine/threonine-protein kinase PLK2 [Gallus gallus]
771920	2165	1178.31	197.73	-2.56329	9.3892e-167	Down	1.04606e-167	ADH1C	GO:0005737//cytoplasm	GO:0004022//alcohol dehydrogenase (NAD) activity;GO:0008270//zinc ion binding	GO:0055114//oxidation-reduction process	K13951//alcohol dehydrogenase 1/7 [EC:1.1.1.1]	gi|762006017|ref|NP_001292112.1|//alcohol dehydrogenase 1 [Gallus gallus]
423856	2128	1841	529	-1.78732	9.03201e-166	Down	1.01635e-166	KAZALD1	NA	NA	NA	K06756//neuronal cell adhesion molecule;K08784//HtrA serine peptidase 1 [EC:3.4.21.-]	gi|50749713|ref|XP_421724.1|//PREDICTED: kazal-type serine protease inhibitor domain-containing protein 1 isoform X1 [Gallus gallus];gi|513191731|ref|XP_004942285.1|//PREDICTED: kazal-type serine protease inhibitor domain-containing protein 1 isoform X2 [Gallus gallus]
395772	2539	1347.63	3149.98	1.23675	1.0267e-165	Up	1.15723e-166	KRT7	GO:0045095//keratin filament	GO:0005198//structural molecule activity	NA	K07605//type II keratin, basic	gi|45384378|ref|NP_990263.1|//keratin, type II cytoskeletal cochleal [Gallus gallus]
423963	8355	1629	417	-1.95404	1.75379e-165	Down	1.98328e-166	MKI67	NA	NA	NA	K17582//antigen KI-67	gi|513192397|ref|XP_004942416.1|//PREDICTED: antigen KI-67 isoform X1 [Gallus gallus];gi|513192400|ref|XP_421822.4|//PREDICTED: antigen KI-67 isoform X2 [Gallus gallus];gi|513192403|ref|XP_004942417.1|//PREDICTED: antigen KI-67 isoform X3 [Gallus gallus]
418833	1825	3787	1746	-1.10517	3.67227e-165	Down	4.15963e-166	RGCC	NA	NA	NA	K05012//chloride channel 3/4/5	gi|50730815|ref|XP_417029.1|//PREDICTED: regulator of cell cycle RGCC isoform X1 [Gallus gallus];gi|971377651|ref|XP_015132217.1|//PREDICTED: regulator of cell cycle RGCC isoform X2 [Gallus gallus]
427801	3909	2524.12	929.44	-1.42952	1.33679e-164	Down	1.52166e-165	MGAT5B	GO:0005794//Golgi apparatus;GO:0016021//integral component of membrane	GO:0030144//alpha-1,6-mannosylglycoprotein 6-beta-N-acetylglucosaminyltransferase activity	GO:0006487//protein N-linked glycosylation	K09661//mannosyl alpha-1,6-glycoprotein beta-1,6-N-acetyl-glucosaminyltransferase, isozyme B [EC:2.4.1.-]	gi|971424429|ref|XP_015150770.1|//PREDICTED: alpha-1,6-mannosylglycoprotein 6-beta-N-acetylglucosaminyltransferase B isoform X2 [Gallus gallus];gi|971424431|ref|XP_015150771.1|//PREDICTED: alpha-1,6-mannosylglycoprotein 6-beta-N-acetylglucosaminyltransferase B isoform X3 [Gallus gallus];gi|971424437|ref|XP_015150775.1|//PREDICTED: alpha-1,6-mannosylglycoprotein 6-beta-N-acetylglucosaminyltransfer…
431270	3164	940.84	105.15	-3.14967	4.32851e-164	Down	4.94322e-165	VWA5A	NA	NA	NA	K10798//poly [ADP-ribose] polymerase [EC:2.4.2.30];K18466//vacuolar protein sorting-associated protein 26	gi|513222580|ref|XP_004948218.1|//PREDICTED: von Willebrand factor A domain-containing protein 5A-like isoform X4 [Gallus gallus];gi|513222575|ref|XP_004948216.1|//PREDICTED: von Willebrand factor A domain-containing protein 5A-like isoform X3 [Gallus gallus];gi|971432191|ref|XP_015153799.1|//PREDICTED: von Willebrand factor A domain-containing protein 5A-like isoform X1 [Gallus gallus];gi|971432…
107049603	4365	3075	1279	-1.25374	6.12851e-164	Down	7.02164e-165	LOC107049603	NA	NA	NA	K09029//protein FosB	gi|971447744|ref|XP_015128804.1|//PREDICTED: LOW QUALITY PROTEIN: protein fosB-like [Gallus gallus]
414140	2763	1789.44	508.05	-1.80464	2.62113e-163	Down	3.01287e-164	AMY2A	NA	GO:0043169//cation binding;GO:0004556//alpha-amylase activity	GO:0005975//carbohydrate metabolic process	K01176//alpha-amylase [EC:3.2.1.1]	gi|971406924|ref|XP_015145741.1|//PREDICTED: amylase, alpha 2A; pancreatic isoform X1 [Gallus gallus];gi|377520154|ref|NP_001001473.2|//amylase, alpha 2A; pancreatic precursor [Gallus gallus]
425184	1036	959	2519	1.40508	2.14791e-161	Up	2.4849e-162	FAM195A	NA	NA	NA	NA	gi|363739662|ref|XP_422971.3|//PREDICTED: protein FAM195A [Gallus gallus]
419704	1720	2969	1222	-1.2689	2.59476e-161	Down	3.00668e-162	SLC37A2	GO:0070062//extracellular exosome;GO:0016021//integral component of membrane	GO:0022857//transmembrane transporter activity	GO:0006820//anion transport;GO:0055085//transmembrane transport	K13783//MFS transporter, OPA family, solute carrier family 37 (glycerol-3-phosphate transporter), member 1/2	gi|971431581|ref|XP_015153574.1|//PREDICTED: sugar phosphate exchanger 2 isoform X2 [Gallus gallus];gi|971431577|ref|XP_015153572.1|//PREDICTED: sugar phosphate exchanger 2 isoform X1 [Gallus gallus]
424071	5863	2138.05	4254	1.00435	4.99192e-160	Up	5.84012e-161	AOX1	GO:0070062//extracellular exosome;GO:0005829//cytosol	GO:0009055//electron carrier activity;GO:0016614//oxidoreductase activity, acting on CH-OH group of donors;GO:0051537//2 iron, 2 sulfur cluster binding;GO:0005506//iron ion binding;GO:0050660//flavin adenine dinucleotide binding;GO:0004854//xanthine dehydrogenase activity;GO:0051287//NAD binding;GO:0016903//oxidoreductase activity, acting on the aldehyde or oxo group of donors	GO:0055114//oxidation-reduction process;GO:0009115//xanthine catabolic process	K00157//aldehyde oxidase [EC:1.2.3.1]	gi|84619522|ref|NP_001033781.1|//aldehyde oxidase [Gallus gallus];gi|971404713|ref|XP_015144903.1|//PREDICTED: aldehyde oxidase isoform X1 [Gallus gallus]
422633	615	855	81	-3.3881	6.48821e-159	Down	7.66305e-160	CL2	GO:0005576//extracellular region;GO:0005581//collagen trimer	GO:0004519//endonuclease activity;GO:0004540//ribonuclease activity;GO:0003676//nucleic acid binding;GO:0005537//mannose binding	GO:0090501//RNA phosphodiester bond hydrolysis;GO:0007275//multicellular organism development	K16631//angiogenin [EC:3.1.27.-]	gi|58696439|ref|NP_001011690.1|//ribonuclease CL2 precursor [Gallus gallus]
415786	2603	1960.77	626.78	-1.63356	1.19367e-155	Down	1.42313e-156	CES1	GO:0005615//extracellular space	GO:0052689//carboxylic ester hydrolase activity	NA	K01044//carboxylesterase 1 [EC:3.1.1.1]	gi|971414534|ref|XP_015147940.1|//PREDICTED: fatty acyl-CoA hydrolase precursor, medium chain isoform X2 [Gallus gallus];gi|971414530|ref|XP_015147938.1|//PREDICTED: fatty acyl-CoA hydrolase precursor, medium chain isoform X1 [Gallus gallus]
426943	1577	2973.4	1253.42	-1.23441	8.6792e-155	Down	1.04283e-155	PLIN5	NA	NA	NA	K20287//perilipin-3	gi|971436357|ref|XP_015155504.1|//PREDICTED: perilipin-3 isoform X1 [Gallus gallus];gi|971436361|ref|XP_015155506.1|//PREDICTED: perilipin-3 isoform X2 [Gallus gallus]
427177	13734	1286.04	278	-2.19795	5.14969e-152	Down	6.25457e-153	CMYA5	NA	NA	NA	K08285//midline 1 [EC:2.3.2.27];K10647//midline 2 [EC:2.3.2.27]	gi|513229540|ref|XP_424765.4|//PREDICTED: cardiomyopathy-associated protein 5 [Gallus gallus]
771012	1792	1005	152	-2.71322	2.00947e-151	Down	2.45182e-152	LOC771012	NA	NA	NA	K01314//coagulation factor X [EC:3.4.21.6]	gi|363728984|ref|XP_001233228.2|//PREDICTED: coagulation factor X-like [Gallus gallus]
428987	4327	922	119	-2.94198	6.92463e-151	Down	8.47472e-152	PPAPDC1A	NA	NA	NA	K01080//phosphatidate phosphatase [EC:3.1.3.4]	gi|513192209|ref|XP_426544.3|//PREDICTED: phosphatidate phosphatase PPAPDC1A [Gallus gallus]
424380	1710	1243	260	-2.24541	7.48793e-151	Down	9.17804e-152	HMGCS2	NA	NA	NA	K01641//hydroxymethylglutaryl-CoA synthase [EC:2.3.3.10]	gi|971407305|ref|XP_422225.4|//PREDICTED: hydroxymethylglutaryl-CoA synthase, mitochondrial [Gallus gallus]
100858704	1375	2955.74	1261.01	-1.21711	1.59036e-150	Down	1.95228e-151	ECM1	NA	NA	NA	K01868//threonyl-tRNA synthetase [EC:6.1.1.3]	gi|971445496|ref|XP_003642711.2|//PREDICTED: extracellular matrix protein 1 [Gallus gallus]
107053870	2272	790.8	70	-3.48606	1.73865e-150	Down	2.13755e-151	LOC107053870	NA	NA	NA	NA	gi|971406160|ref|XP_015145429.1|//PREDICTED: translation initiation factor IF-2-like [Gallus gallus]
427091	5067	1986	3958	1.00674	1.42204e-149	Up	1.76153e-150	SLC25A42	GO:0005634//nucleus;GO:0005743//mitochondrial inner membrane;GO:0016021//integral component of membrane	GO:0005347//ATP transmembrane transporter activity;GO:0015217//ADP transmembrane transporter activity;GO:0015228//coenzyme A transmembrane transporter activity;GO:0080122//AMP transmembrane transporter activity;GO:0003735//structural constituent of ribosome;GO:0043262//adenosine-diphosphatase activity	GO:0015867//ATP transport;GO:0035349//coenzyme A transmembrane transport;GO:0006412//translation;GO:0080121//AMP transport;GO:0015866//ADP transport	K15085//solute carrier family 25, member 42	gi|363743829|ref|XP_424684.3|//PREDICTED: mitochondrial coenzyme A transporter SLC25A42 isoform X1 [Gallus gallus];gi|697001085|ref|XP_009566583.1|//PREDICTED: mitochondrial coenzyme A transporter SLC25A42 isoform X2 [Cuculus canorus];gi|971436591|ref|XP_015155611.1|//PREDICTED: mitochondrial coenzyme A transporter SLC25A42 isoform X2 [Gallus gallus]
770629	3672	1116	204	-2.43987	1.6601e-149	Down	2.0595e-150	RANBP3L	NA	NA	NA	K15304//Ran-binding protein 3	gi|971438180|ref|XP_015133003.1|//PREDICTED: ran-binding protein 3-like isoform X1 [Gallus gallus];gi|971438182|ref|XP_015133004.1|//PREDICTED: ran-binding protein 3-like isoform X2 [Gallus gallus]
429823	17217	2237	814	-1.44663	1.18669e-148	Down	1.4744e-149	HMCN1	NA	NA	NA	K17341//hemicentin	gi|971407772|ref|XP_015146074.1|//PREDICTED: hemicentin-1 isoform X3 [Gallus gallus];gi|971407774|ref|XP_015146075.1|//PREDICTED: hemicentin-1 isoform X4 [Gallus gallus];gi|971407768|ref|XP_015146072.1|//PREDICTED: hemicentin-1 isoform X1 [Gallus gallus];gi|971407784|ref|XP_015146080.1|//PREDICTED: hemicentin-1 isoform X9 [Gallus gallus];gi|971407778|ref|XP_015146077.1|//PREDICTED: hemicentin-1 i…
107049146	2177	1449.7	3157.91	1.13505	3.89324e-145	Up	4.89509e-146	LOC107049146	GO:0005922//connexin complex;GO:0016021//integral component of membrane	NA	GO:0007154//cell communication	K07616//gap junction protein, alpha 7	gi|971405522|ref|XP_015145193.1|//PREDICTED: gap junction gamma-1 protein-like [Gallus gallus]
418228	9717	2037	707	-1.51483	5.43111e-145	Down	6.83881e-146	SCUBE1	NA	NA	NA	K06825//fibrillin 1;K17307//fibulin 1/2	gi|971373225|ref|XP_015146758.1|//PREDICTED: signal peptide, CUB and EGF-like domain-containing protein 1 isoform X2 [Gallus gallus];gi|971373227|ref|XP_015146764.1|//PREDICTED: signal peptide, CUB and EGF-like domain-containing protein 1 isoform X3 [Gallus gallus];gi|971373223|ref|XP_015146754.1|//PREDICTED: signal peptide, CUB and EGF-like domain-containing protein 1 isoform X1 [Gallus gallus];…
107056777	5887	3617.7	1744.29	-1.0406	3.05055e-143	Down	3.88662e-144	LOC107056777	NA	NA	NA	NA	gi|971443745|ref|XP_015157262.1|//PREDICTED: uveal autoantigen with coiled-coil domains and ankyrin repeats-like [Gallus gallus]
414875	790	603	11	-5.76475	1.58362e-142	Down	2.02942e-143	AvBD8	GO:0005576//extracellular region	NA	GO:0042742//defense response to bacterium	NA	gi|49169806|ref|NP_001001781.1|//gallinacin-8 precursor [Gallus gallus];gi|971390690|ref|XP_015140583.1|//PREDICTED: gallinacin-8 isoform X1 [Gallus gallus]
423413	2458	3120	1412	-1.13198	1.21735e-141	Down	1.56232e-142	FBLN5	NA	NA	NA	K17340//fibulin 5	gi|477507234|ref|NP_001264403.1|//fibulin-5 precursor [Gallus gallus]
417769	3200	3100	1401	-1.13398	3.84872e-141	Down	4.97512e-142	WNT2	NA	NA	NA	K00182//wingless-type MMTV integration site family, member 2	gi|363727512|ref|XP_416013.3|//PREDICTED: protein Wnt-2 [Gallus gallus]
100857889	7754	180.53	1012.3	2.49916	1.26418e-140	Up	1.63887e-141	PLCXD3	NA	NA	NA	NA	gi|363744123|ref|XP_003642980.1|//PREDICTED: PI-PLC X domain-containing protein 3 [Gallus gallus]
769889	2763	3671	1796	-1.01956	1.39134e-140	Down	1.80631e-141	APOLD1	NA	NA	NA	K14777//ATP-dependent RNA helicase DDX47/RRP3 [EC:3.6.4.13];K14480//apolipoprotein L	gi|513158895|ref|XP_004937733.1|//PREDICTED: apolipoprotein L domain-containing protein 1 [Gallus gallus]
107050147	1543	1305.3	2912.58	1.16975	1.60224e-140	Up	2.08607e-141	LOC107050147	NA	NA	NA	K00898//pyruvate dehydrogenase kinase 2/3/4 [EC:2.7.11.2]	gi|971449273|ref|XP_015129412.1|//PREDICTED: pyruvate dehydrogenase (acetyl-transferring) kinase isozyme 2, mitochondrial [Gallus gallus]
418432	1506	222	1101	2.32201	2.13097e-140	Up	2.78238e-141	NSUN3	GO:0005762//mitochondrial large ribosomal subunit	GO:0008168//methyltransferase activity	GO:0031167//rRNA methylation	K14835//ribosomal RNA methyltransferase Nop2 [EC:2.1.1.-];K07962//ADP-ribosylation factor-like protein 13B	gi|513162151|ref|XP_416643.3|//PREDICTED: putative methyltransferase NSUN3 isoform X1 [Gallus gallus];gi|513162154|ref|XP_004938371.1|//PREDICTED: putative methyltransferase NSUN3 isoform X2 [Gallus gallus]
418232	2616	2246	855	-1.38153	2.55068e-139	Down	3.34937e-140	SULT4A1	NA	GO:0008146//sulfotransferase activity	GO:0006790//sulfur compound metabolic process	K11823//sulfotransferase 4A1 [EC:2.8.2.-]	gi|729732022|ref|XP_010561890.1|//PREDICTED: sulfotransferase 4A1 [Haliaeetus leucocephalus];gi|971373207|ref|XP_015146702.1|//PREDICTED: sulfotransferase 4A1 isoform X4 [Gallus gallus];gi|971373205|ref|XP_015146698.1|//PREDICTED: sulfotransferase 4A1 isoform X3 [Gallus gallus];gi|971373200|ref|XP_015146681.1|//PREDICTED: sulfotransferase 4A1 isoform X1 [Gallus gallus]
101749614	1636	9.53	582.25	5.94485	1.12453e-138	Up	1.48502e-139	LOC101749614	NA	NA	NA	K14165//atypical dual specificity phosphatase [EC:3.1.3.16 3.1.3.48];K04257//olfactory receptor	gi|971446678|ref|XP_015128339.1|//PREDICTED: coiled-coil domain-containing protein 81-like isoform X1 [Gallus gallus];gi|971446682|ref|XP_015128341.1|//PREDICTED: coiled-coil domain-containing protein 81-like isoform X3 [Gallus gallus];gi|971446686|ref|XP_015128343.1|//PREDICTED: coiled-coil domain-containing protein 81-like isoform X5 [Gallus gallus];gi|971446680|ref|XP_015128340.1|//PREDICTED: …
418085	1852	2862	1257	-1.17521	5.30137e-138	Down	7.02055e-139	GLT8D2	NA	GO:0016757//transferase activity, transferring glycosyl groups	NA	NA	gi|485050522|ref|NP_001264312.2|//glycosyltransferase 8 domain-containing protein 2 precursor [Gallus gallus]
424593	1591	939	153	-2.60576	1.32806e-135	Down	1.78097e-136	SEPP1L	NA	NA	NA	NA	gi|971409432|ref|XP_003641735.3|//PREDICTED: selenoprotein Pb [Gallus gallus]
423898	2177	741.96	74	-3.31391	1.38521e-135	Down	1.86019e-136	HABP2	NA	NA	NA	K08648//hyaluronan binding protein 2 [EC:3.4.21.-]	gi|971402765|ref|XP_015144142.1|//PREDICTED: hyaluronan-binding protein 2 isoform X1 [Gallus gallus];gi|475506293|ref|NP_001264308.1|//hyaluronan-binding protein 2 preproprotein [Gallus gallus]
101749651	1638	1676.95	3409.13	1.03539	4.5518e-135	Up	6.13796e-136	LOC101749651	NA	NA	NA	K20820//BLOC-1 related complex subunit 6	gi|513178082|ref|XP_004940447.1|//PREDICTED: uncharacterized protein C17orf59 homolog [Gallus gallus]
418078	3463	1492	429	-1.78637	1.56809e-134	Down	2.12328e-135	ALDH1L2	NA	NA	NA	K00289//formyltetrahydrofolate dehydrogenase [EC:1.5.1.6]	gi|971372386|ref|XP_015143266.1|//PREDICTED: mitochondrial 10-formyltetrahydrofolate dehydrogenase isoform X1 [Gallus gallus];gi|118082834|ref|XP_416314.2|//PREDICTED: mitochondrial 10-formyltetrahydrofolate dehydrogenase isoform X2 [Gallus gallus]
424744	4422	986.7	177.18	-2.46557	6.0748e-134	Down	8.25948e-135	NGEF	GO:0005829//cytosol	GO:0005089//Rho guanyl-nucleotide exchange factor activity	GO:0043065//positive regulation of apoptotic process;GO:0043087//regulation of GTPase activity;GO:0048013//ephrin receptor signaling pathway;GO:0035023//regulation of Rho protein signal transduction;GO:0043547//positive regulation of GTPase activity;GO:0051056//regulation of small GTPase mediated signal transduction;GO:0061002//negative regulation of dendritic spine morphogenesis	K07525//neuronal guanine nucleotide exchange factor	gi|971409744|ref|XP_015132346.1|//PREDICTED: ephexin-1 isoform X3 [Gallus gallus];gi|971409740|ref|XP_015132344.1|//PREDICTED: ephexin-1 isoform X1 [Gallus gallus];gi|971409742|ref|XP_015132345.1|//PREDICTED: ephexin-1 isoform X2 [Gallus gallus]
419861	1678	1015	191	-2.39801	1.9743e-133	Down	2.69533e-134	HSD11B1b	NA	NA	NA	K15680//corticosteroid 11-beta-dehydrogenase isozyme 1 [EC:1.1.1.146]	gi|118102457|ref|XP_417988.2|//PREDICTED: corticosteroid 11-beta-dehydrogenase isozyme 1 [Gallus gallus]
100858635	1807	2164	831	-1.36895	1.89238e-132	Down	2.59053e-133	FJX1	NA	NA	NA	K16674//four-jointed box protein 1	gi|974987301|ref|NP_001305914.1|//four jointed box 1 precursor [Gallus gallus]
421922	5535	1493.35	3122.32	1.0759	9.56514e-132	Up	1.31296e-132	RNF144A	GO:0000151//ubiquitin ligase complex;GO:0005794//Golgi apparatus;GO:0016021//integral component of membrane	GO:0061630//ubiquitin protein ligase activity;GO:0008270//zinc ion binding;GO:0016874//ligase activity;GO:0031624//ubiquitin conjugating enzyme binding	GO:0032436//positive regulation of proteasomal ubiquitin-dependent protein catabolic process;GO:0042787//protein ubiquitination involved in ubiquitin-dependent protein catabolic process;GO:0000209//protein polyubiquitination	K11975//E3 ubiquitin-protein ligase RNF144 [EC:2.3.2.27]	gi|363732382|ref|XP_419938.3|//PREDICTED: E3 ubiquitin-protein ligase RNF144A [Gallus gallus]
395404	1400	571	20	-4.82359	4.65632e-131	Down	6.44346e-132	FETUB	NA	NA	NA	K03898//kininogen	gi|475808547|ref|NP_001264337.1|//fetuin-B precursor [Gallus gallus]
420883	1651	3463.96	1706.1	-1.00989	1.07326e-130	Down	1.48918e-131	TUBB2B	GO:0070062//extracellular exosome;GO:0005634//nucleus;GO:0005874//microtubule;GO:0005737//cytoplasm	GO:0005200//structural constituent of cytoskeleton;GO:0005525//GTP binding;GO:0003924//GTPase activity	GO:0007017//microtubule-based process	K07375//tubulin beta	gi|52138699|ref|NP_001004400.1|//tubulin beta-2 chain [Gallus gallus];gi|884815500|ref|XP_012984715.1|//PREDICTED: tubulin beta-1 chain isoform X2 [Melopsittacus undulatus]
100857191	1730	1143	258	-2.13555	1.50946e-130	Down	2.09723e-131	LOC100857191	NA	NA	NA	K16062//C-C motif chemokine 21	gi|363744357|ref|XP_003643029.1|//PREDICTED: C-C motif chemokine 26-like [Gallus gallus]
420738	4662	1031	212	-2.27008	4.91511e-127	Down	6.93869e-128	ANLN	NA	NA	NA	K18621//actin-binding protein anillin	gi|363730134|ref|XP_418836.3|//PREDICTED: actin-binding protein anillin isoform X2 [Gallus gallus];gi|971380570|ref|XP_015137168.1|//PREDICTED: actin-binding protein anillin isoform X1 [Gallus gallus];gi|971380573|ref|XP_015137169.1|//PREDICTED: actin-binding protein anillin isoform X3 [Gallus gallus]
424354	10664	1256	324	-1.94294	5.57618e-127	Down	7.8823e-128	ASPM	NA	NA	NA	K16743//abnormal spindle-like microcephaly-associated protein	gi|971407190|ref|XP_422197.5|//PREDICTED: abnormal spindle-like microcephaly-associated protein [Gallus gallus]
107049949	1275	269.53	1134.59	2.08548	8.02848e-127	Up	1.13787e-127	LOC107049949	NA	NA	NA	K18273//alpha-tectorin	gi|971448807|ref|XP_015129234.1|//PREDICTED: IgGFc-binding protein-like [Gallus gallus]
395677	1875	583	31	-4.22133	2.5219e-126	Down	3.58834e-127	TACR1	GO:0005887//integral component of plasma membrane	GO:0016496//substance P receptor activity	GO:0007217//tachykinin receptor signaling pathway;GO:0007268//chemical synaptic transmission;GO:0048265//response to pain;GO:0007166//cell surface receptor signaling pathway;GO:0070472//regulation of uterine smooth muscle contraction;GO:0045987//positive regulation of smooth muscle contraction	K04222//tachykinin receptor 1	gi|45382375|ref|NP_990199.1|//substance-P receptor [Gallus gallus]
419903	2773	574	28	-4.34572	2.9811e-126	Down	4.24725e-127	PACSIN1	GO:0005768//endosome;GO:0005829//cytosol;GO:0043209//myelin sheath;GO:0030137//COPI-coated vesicle;GO:0032587//ruffle membrane	GO:0008092//cytoskeletal protein binding;GO:0005543//phospholipid binding	GO:0007015//actin filament organization;GO:0048488//synaptic vesicle endocytosis;GO:0045806//negative regulation of endocytosis;GO:0048812//neuron projection morphogenesis;GO:0072657//protein localization to membrane;GO:0097320//plasma membrane tubulation	K20123//protein kinase C and casein kinase substrate in neurons protein	gi|363743111|ref|XP_418028.3|//PREDICTED: protein kinase C and casein kinase substrate in neurons protein 1 [Gallus gallus]
107048988	9471	134	843	2.66513	6.80627e-126	Up	9.74771e-127	DOCK3	NA	NA	NA	K05727//dedicator of cytokinesis protein 3	gi|971415678|ref|XP_015148397.1|//PREDICTED: dedicator of cytokinesis protein 3 isoform X5 [Gallus gallus];gi|971415682|ref|XP_015148399.1|//PREDICTED: dedicator of cytokinesis protein 3 isoform X7 [Gallus gallus];gi|971415694|ref|XP_015148405.1|//PREDICTED: dedicator of cytokinesis protein 3 isoform X13 [Gallus gallus];gi|971415680|ref|XP_015148398.1|//PREDICTED: dedicator of cytokinesis protein…
101748831	12510	2392	1009	-1.23346	1.15795e-124	Down	1.66914e-125	LOC101748831	NA	NA	NA	K06252//tenascin	gi|971378776|ref|XP_015136353.1|//PREDICTED: teneurin-4 [Gallus gallus]
100859398	1604	72.98	685.16	3.2427	5.1107e-124	Up	7.38592e-125	POLD2	NA	GO:0003677//DNA binding;GO:0003887//DNA-directed DNA polymerase activity	GO:0071897//DNA biosynthetic process;GO:0006260//DNA replication	K02328//DNA polymerase delta subunit 2	gi|971430269|ref|XP_015152997.1|//PREDICTED: DNA polymerase delta subunit 2 [Gallus gallus]
101750988	924	919.15	170.98	-2.41464	6.18134e-122	Down	9.01367e-123	LOC101750988	NA	NA	NA	K11514//Borealin	gi|971444698|ref|XP_015157682.1|//PREDICTED: borealin-like isoform X1 [Gallus gallus]
107057175	1115	265.08	1093.14	2.05581	4.82743e-120	Up	7.12918e-121	LOC107057175	NA	NA	NA	K11514//Borealin	gi|971444701|ref|XP_015157683.1|//PREDICTED: borealin-like isoform X2 [Gallus gallus];gi|971444698|ref|XP_015157682.1|//PREDICTED: borealin-like isoform X1 [Gallus gallus]
771003	3391	1059	245	-2.10002	1.51382e-118	Down	2.25533e-119	CAMKK1	NA	GO:0004674//protein serine/threonine kinase activity;GO:0005524//ATP binding	GO:0006468//protein phosphorylation	K00908//calcium/calmodulin-dependent protein kinase kinase 1 [EC:2.7.11.17]	gi|971426354|ref|XP_015151459.1|//PREDICTED: calcium/calmodulin-dependent protein kinase kinase 1 isoform X1 [Gallus gallus];gi|971426374|ref|XP_004946514.2|//PREDICTED: calcium/calmodulin-dependent protein kinase kinase 1 isoform X2 [Gallus gallus]
429084	1849	2049	815.1	-1.31804	1.74764e-118	Down	2.61343e-119	F3	NA	NA	NA	K03901//coagulation factor III (tissue factor)	gi|513197076|ref|XP_426640.2|//PREDICTED: tissue factor [Gallus gallus]
417809	3024	584	42	-3.78568	1.8869e-118	Down	2.82519e-119	SLC38A4	NA	NA	NA	K14991//solute carrier family 38 (sodium-coupled neutral amino acid transporter), member 4	gi|313760563|ref|NP_001186478.1|//sodium-coupled neutral amino acid transporter 4 [Gallus gallus]
422649	6757	768.86	1947.95	1.35299	3.10826e-118	Up	4.65967e-119	SLC4A4	GO:0016323//basolateral plasma membrane;GO:0070062//extracellular exosome;GO:0016021//integral component of membrane	GO:0005452//inorganic anion exchanger activity;GO:0008510//sodium:bicarbonate symporter activity	GO:0015701//bicarbonate transport;GO:0035725//sodium ion transmembrane transport;GO:0015698//inorganic anion transport;GO:0098656//anion transmembrane transport	K13575//solute carrier family 4 (sodium bicarbonate cotransporter), member 4	gi|971393636|ref|XP_015131891.1|//PREDICTED: electrogenic sodium bicarbonate cotransporter 1 isoform X1 [Gallus gallus];gi|971393641|ref|XP_015131893.1|//PREDICTED: electrogenic sodium bicarbonate cotransporter 1 isoform X3 [Gallus gallus];gi|971393643|ref|XP_015131894.1|//PREDICTED: electrogenic sodium bicarbonate cotransporter 1 isoform X4 [Gallus gallus];gi|513183316|ref|XP_420603.3|//PREDICTE…
427856	1747	2616	1188	-1.127	3.56905e-118	Down	5.36373e-119	WNT16	NA	NA	NA	K01558//wingless-type MMTV integration site family, member 16	gi|971371143|ref|XP_001233678.4|//PREDICTED: protein Wnt-16 [Gallus gallus]
428743	2875	1352	401	-1.74159	7.15575e-118	Down	1.07939e-118	ETNPPL	NA	GO:0042802//identical protein binding;GO:0008483//transaminase activity;GO:0030170//pyridoxal phosphate binding	NA	K14286//ethanolamine-phosphate phospho-lyase [EC:4.2.3.2]	gi|971394154|ref|XP_015132066.1|//PREDICTED: ethanolamine-phosphate phospho-lyase isoform X1 [Gallus gallus];gi|971394156|ref|XP_015132067.1|//PREDICTED: ethanolamine-phosphate phospho-lyase isoform X2 [Gallus gallus]
420335	2569	852	150	-2.49406	2.26567e-117	Down	3.43866e-118	SQLE	NA	NA	NA	K00511//squalene monooxygenase [EC:1.14.14.17]	gi|302632542|ref|NP_001181856.1|//squalene monooxygenase [Gallus gallus]
107050372	2671	864.51	2074.89	1.27491	6.18951e-115	Up	9.55515e-116	LOC107050372	NA	NA	NA	NA	gi|971449806|ref|XP_015129631.1|//PREDICTED: collagen alpha-1(I) chain-like, partial [Gallus gallus]
424116	9505	1494	493	-1.58769	3.14921e-114	Down	4.89092e-115	PDE1A	NA	GO:0046872//metal ion binding;GO:0004114//3',5'-cyclic-nucleotide phosphodiesterase activity	GO:0007165//signal transduction	K13755//calcium/calmodulin-dependent 3',5'-cyclic nucleotide phosphodiesterase [EC:3.1.4.17]	gi|513193830|ref|XP_004942740.1|//PREDICTED: calcium/calmodulin-dependent 3',5'-cyclic nucleotide phosphodiesterase 1A isoform X1 [Gallus gallus];gi|513193833|ref|XP_421969.4|//PREDICTED: calcium/calmodulin-dependent 3',5'-cyclic nucleotide phosphodiesterase 1A isoform X3 [Gallus gallus];gi|513193842|ref|XP_004942743.1|//PREDICTED: calcium/calmodulin-dependent 3',5'-cyclic nucleotide phosphodiest…
417420	2096	1725	638	-1.42314	3.24962e-112	Down	5.12545e-113	KPNA2	NA	NA	NA	K15043//importin subunit alpha-2	gi|57525267|ref|NP_001006209.1|//importin subunit alpha-1 [Gallus gallus] ;gi|971424678|ref|XP_015135377.1|//PREDICTED: importin subunit alpha-1 isoform X1 [Gallus gallus]
421068	3209	2811	1354	-1.04203	6.92535e-112	Down	1.09745e-112	ABHD3	GO:0016021//integral component of membrane	GO:0008970//phosphatidylcholine 1-acylhydrolase activity;GO:0004623//phospholipase A2 activity	GO:0046470//phosphatidylcholine metabolic process	K13696//abhydrolase domain-containing protein 1/3	gi|513171936|ref|XP_004939825.1|//PREDICTED: phospholipase ABHD3 isoform X2 [Gallus gallus];gi|971383644|ref|XP_015133452.1|//PREDICTED: phospholipase ABHD3 isoform X1 [Gallus gallus]
395781	1768	683.72	89.43	-2.92274	1.43586e-111	Down	2.28073e-112	MRPS30	GO:0005840//ribosome;GO:0005739//mitochondrion	GO:0003735//structural constituent of ribosome	GO:0006412//translation	K17409//small subunit ribosomal protein S30	gi|45384394|ref|NP_990270.1|//28S ribosomal protein S30, mitochondrial [Gallus gallus]
418187	3356	545	40	-3.75635	4.64427e-110	Down	7.472e-111	SLCO1B1	GO:0016021//integral component of membrane;GO:0005886//plasma membrane	GO:0005215//transporter activity	GO:0006811//ion transport	K05043//solute carrier organic anion transporter family, member 1B;K08747//solute carrier organic anion transporter family, member 1C	gi|971825923|ref|NP_001305378.1|//solute carrier organic anion transporter family member 1B1 [Gallus gallus]
100857984	702	1402	2822	1.02106	1.45616e-109	Up	2.35088e-110	ZMYM6NB	NA	NA	NA	K13219//splicing factor, proline- and glutamine-rich	gi|971430973|ref|XP_003642617.3|//PREDICTED: uncharacterized protein ZMYM6NB isoform X1 [Gallus gallus];gi|971430975|ref|XP_004947836.2|//PREDICTED: uncharacterized protein ZMYM6NB isoform X2 [Gallus gallus]
497224	2979	966.6	2189.83	1.19166	3.70273e-109	Up	5.98474e-110	PCDHAC2	GO:0016021//integral component of membrane;GO:0005886//plasma membrane	GO:0005509//calcium ion binding	GO:0007399//nervous system development;GO:0007156//homophilic cell adhesion via plasma membrane adhesion molecules	K16493//protocadherin alpha	gi|162287097|ref|NP_001104601.1|//protocadherin alpha-C2 precursor [Gallus gallus]
107049764	3754	6.89	455.45	6.05847	1.21524e-108	Up	1.97097e-109	LOC107049764	NA	NA	NA	NA	gi|971438784|ref|XP_015135619.1|//PREDICTED: uncharacterized protein LOC107052257 [Gallus gallus]
101747308	2226	212	932	2.1481	2.22948e-108	Up	3.62425e-109	INA	NA	NA	NA	K07608//internexin neuronal intermediate filament protein, alpha	gi|971402926|ref|XP_015144218.1|//PREDICTED: alpha-internexin [Gallus gallus]
421373	3017	203	913	2.18097	3.31487e-108	Up	5.401e-109	DTL	GO:0005654//nucleoplasm;GO:0005730//nucleolus;GO:0031464//Cul4A-RING E3 ubiquitin ligase complex;GO:0005813//centrosome;GO:0005694//chromosome;GO:0005737//cytoplasm;GO:0031465//Cul4B-RING E3 ubiquitin ligase complex	GO:0004842//ubiquitin-protein transferase activity	GO:0019985//translesion synthesis;GO:0006511//ubiquitin-dependent protein catabolic process;GO:0006260//DNA replication;GO:0006513//protein monoubiquitination;GO:0009411//response to UV;GO:0051726//regulation of cell cycle;GO:0031572//G2 DNA damage checkpoint;GO:0000209//protein polyubiquitination	K11790//denticleless	gi|71895517|ref|NP_001026219.1|//denticleless protein homolog [Gallus gallus]
420415	3828	1021	252.5	-2.0038	9.83737e-108	Down	1.61014e-108	VILL	NA	GO:0003779//actin binding	GO:0007010//cytoskeleton organization	K05761//villin 1	gi|118085502|ref|XP_418521.2|//PREDICTED: villin-like protein isoform X2 [Gallus gallus];gi|513167448|ref|XP_004939173.1|//PREDICTED: villin-like protein isoform X1 [Gallus gallus]
101750235	2945	583	58	-3.31754	5.85646e-107	Down	9.60743e-108	NXPH2	NA	NA	NA	K16657//neurexophilin-2	gi|513195360|ref|XP_004943059.1|//PREDICTED: neurexophilin-2 [Gallus gallus]
425711	1881	1846	735	-1.31676	9.70002e-107	Down	1.59307e-107	C8ORF22	NA	NA	NA	NA	gi|971383806|ref|XP_015138082.1|//PREDICTED: pancreatic progenitor cell differentiation and proliferation factor-like protein isoform X1 [Gallus gallus];gi|694016449|ref|NP_001289128.1|//pancreatic progenitor cell differentiation and proliferation factor-like protein [Gallus gallus]
420459	1636	1262	388	-1.68975	1.30725e-105	Down	2.15911e-106	IDI1	NA	NA	NA	K01823//isopentenyl-diphosphate Delta-isomerase [EC:5.3.3.2]	gi|513167722|ref|XP_004939224.1|//PREDICTED: isopentenyl-diphosphate Delta-isomerase 1 isoform X2 [Gallus gallus];gi|513167719|ref|XP_418561.4|//PREDICTED: isopentenyl-diphosphate Delta-isomerase 1 isoform X1 [Gallus gallus]
101752246	2692	1202	2496	1.06601	4.57251e-104	Up	7.62868e-105	CBX7	NA	NA	NA	K11454//chromobox protein 7	gi|971372628|ref|XP_004937799.2|//PREDICTED: chromobox protein homolog 7 isoform X1 [Gallus gallus];gi|971372632|ref|XP_015144186.1|//PREDICTED: chromobox protein homolog 7 isoform X3 [Gallus gallus];gi|971372630|ref|XP_015144184.1|//PREDICTED: chromobox protein homolog 7 isoform X2 [Gallus gallus]
415901	3008	590	65	-3.17037	4.58492e-104	Down	7.65793e-105	ITIH3	NA	NA	NA	K19014//inter-alpha-trypsin inhibitor heavy chain H1	gi|513204260|ref|XP_414253.4|//PREDICTED: inter-alpha-trypsin inhibitor heavy chain H3 isoform X1 [Gallus gallus];gi|971415348|ref|XP_015148244.1|//PREDICTED: inter-alpha-trypsin inhibitor heavy chain H3 isoform X2 [Gallus gallus]
396057	1260	2406	1117	-1.09518	5.84187e-104	Down	9.77906e-105	STMN1	GO:0016020//membrane;GO:0070062//extracellular exosome;GO:0005874//microtubule;GO:0005829//cytosol;GO:0043005//neuron projection	GO:0015631//tubulin binding	GO:0051272//positive regulation of cellular component movement;GO:0007052//mitotic spindle organization;GO:0007019//microtubule depolymerization;GO:0009615//response to virus;GO:0007409//axonogenesis;GO:0031115//negative regulation of microtubule polymerization	K04381//stathmin	gi|50053682|ref|NP_001001858.1|//stathmin [Gallus gallus]
428797	13847	2494.96	1183.69	-1.0639	7.33444e-103	Down	1.24549e-103	SORCS2	NA	NA	NA	K12388//sortilin	gi|971395801|ref|XP_015141352.1|//PREDICTED: VPS10 domain-containing receptor SorCS2 [Gallus gallus]
426928	4954	2485	1177	-1.0663	7.88021e-103	Down	1.3411e-103	ENPP3	NA	NA	NA	K01513//ectonucleotide pyrophosphatase/phosphodiesterase family member 1/3 [EC:3.1.4.1 3.6.1.9]	gi|971387924|ref|XP_003641087.2|//PREDICTED: ectonucleotide pyrophosphatase/phosphodiesterase family member 3 [Gallus gallus]
396276	6169	1668	640	-1.37015	1.41813e-102	Down	2.41873e-103	COL14A1	GO:0070062//extracellular exosome;GO:0005615//extracellular space;GO:0005581//collagen trimer;GO:0005578//proteinaceous extracellular matrix	NA	GO:0007155//cell adhesion	K08133//collagen, type XIV, alpha	gi|971384928|ref|XP_015138544.1|//PREDICTED: collagen alpha-1(XIV) chain isoform X1 [Gallus gallus];gi|971384932|ref|XP_015138546.1|//PREDICTED: collagen alpha-1(XIV) chain isoform X2 [Gallus gallus];gi|971384936|ref|XP_015138549.1|//PREDICTED: collagen alpha-1(XIV) chain isoform X4 [Gallus gallus];gi|971384942|ref|XP_015138552.1|//PREDICTED: collagen alpha-1(XIV) chain isoform X6 [Gallus gallus]…
395218	1277	1303	421	-1.61811	1.4882e-102	Down	2.54102e-103	FBP1	NA	NA	NA	K03841//fructose-1,6-bisphosphatase I [EC:3.1.3.11]	gi|487442792|ref|NP_001264977.1|//fructose-1,6-bisphosphatase 1 [Gallus gallus]
100858159	2476	441	14	-4.96545	1.8757e-102	Down	3.2131e-103	AOC1	NA	NA	NA	K11182//diamine oxidase [EC:1.4.3.22]	gi|971379473|ref|XP_015136639.1|//PREDICTED: amiloride-sensitive amine oxidase [copper-containing] isoform X2 [Gallus gallus];gi|971379469|ref|XP_015136637.1|//PREDICTED: amiloride-sensitive amine oxidase [copper-containing] isoform X1 [Gallus gallus]
419731	2723	1311	428	-1.60315	8.01304e-102	Down	1.37861e-102	ST14	GO:0070062//extracellular exosome;GO:0016021//integral component of membrane;GO:0019897//extrinsic component of plasma membrane	GO:0004252//serine-type endopeptidase activity	GO:0006508//proteolysis;GO:0030216//keratinocyte differentiation;GO:0001843//neural tube closure	K08670//suppressor of tumorigenicity protein 14 [EC:3.4.21.109]	gi|971431678|ref|XP_015153605.1|//PREDICTED: suppressor of tumorigenicity 14 protein isoform X1 [Gallus gallus];gi|971431680|ref|XP_015153606.1|//PREDICTED: suppressor of tumorigenicity 14 protein isoform X2 [Gallus gallus];gi|513222086|ref|XP_004948040.1|//PREDICTED: suppressor of tumorigenicity 14 protein isoform X5 [Gallus gallus];gi|513222082|ref|XP_004948038.1|//PREDICTED: suppressor of tumo…
428012	4030	716	1758	1.30773	1.74839e-101	Up	3.01128e-102	TBC1D8	NA	NA	NA	K19951//TBC1 domain family member 8/9	gi|363729011|ref|XP_425583.3|//PREDICTED: TBC1 domain family member 8 isoform X2 [Gallus gallus];gi|513164236|ref|XP_004938561.1|//PREDICTED: TBC1 domain family member 8 isoform X1 [Gallus gallus]
771085	2577	576.25	63.9	-3.16098	2.06331e-101	Down	3.55752e-102	LOC771085	GO:0005887//integral component of plasma membrane	GO:0008020//G-protein coupled photoreceptor activity	GO:0007186//G-protein coupled receptor signaling pathway;GO:0071482//cellular response to light stimulus;GO:0007602//phototransduction;GO:0009584//detection of visible light;GO:0007601//visual perception;GO:0018298//protein-chromophore linkage	K04256//c-opsin	gi|971825810|ref|NP_001305360.1|//uncharacterized protein LOC771085 [Gallus gallus]
395255	2056	431	1295	1.59902	4.84009e-101	Up	8.36319e-102	FIGF	NA	NA	NA	K05449//vascular endothelial growth factor C/D	gi|971376119|ref|XP_015128579.1|//PREDICTED: vascular endothelial growth factor D isoform X1 [Gallus gallus];gi|742799261|ref|NP_989899.2|//vascular endothelial growth factor D precursor [Gallus gallus]
424072	4391	538.95	1472	1.46138	1.26633e-100	Up	2.1928e-101	AOX2	NA	GO:0009055//electron carrier activity;GO:0016614//oxidoreductase activity, acting on CH-OH group of donors;GO:0051537//2 iron, 2 sulfur cluster binding;GO:0005506//iron ion binding;GO:0050660//flavin adenine dinucleotide binding;GO:0051287//NAD binding	GO:0055114//oxidation-reduction process	K00157//aldehyde oxidase [EC:1.2.3.1]	gi|88853857|ref|NP_001034690.1|//aldehyde oxidase 2 [Gallus gallus];gi|971404715|ref|XP_015144904.1|//PREDICTED: aldehyde oxidase 2 isoform X1 [Gallus gallus];gi|971404717|ref|XP_015144905.1|//PREDICTED: aldehyde oxidase 2 isoform X2 [Gallus gallus]
423434	1438	460	24	-4.2487	2.45992e-100	Down	4.27338e-101	SERPINA1	NA	NA	NA	K04525//serpin peptidase inhibitor, clade A	gi|478246985|ref|NP_001264422.1|//serpin peptidase inhibitor, clade A (alpha-1 antiproteinase, antitrypsin), member 1 precursor [Gallus gallus]
395780	1199	1300	427	-1.59437	3.41264e-100	Down	5.93479e-101	APOA4	GO:0070062//extracellular exosome;GO:0009986//cell surface;GO:0072562//blood microparticle;GO:0034364//high-density lipoprotein particle;GO:0042627//chylomicron;GO:0034361//very-low-density lipoprotein particle	GO:0016209//antioxidant activity;GO:0031210//phosphatidylcholine binding;GO:0060228//phosphatidylcholine-sterol O-acyltransferase activator activity;GO:0005507//copper ion binding;GO:0015485//cholesterol binding;GO:0017127//cholesterol transporter activity;GO:0042803//protein homodimerization activity	GO:0010898//positive regulation of triglyceride catabolic process;GO:0046470//phosphatidylcholine metabolic process;GO:0007159//leukocyte cell-cell adhesion;GO:0033344//cholesterol efflux;GO:0034372//very-low-density lipoprotein particle remodeling;GO:0070328//triglyceride homeostasis;GO:0031102//neuron projection regeneration;GO:0042632//cholesterol homeostasis;GO:0034445//negative regulation of…	K08760//apolipoprotein A-IV	gi|45384392|ref|NP_990269.1|//apolipoprotein A-IV precursor [Gallus gallus]
426132	1960	1341	452	-1.55708	7.30996e-100	Down	1.27396e-100	GSDMA	NA	NA	NA	K20917//gasdermin-D	gi|971435202|ref|XP_015155000.1|//PREDICTED: gasdermin-A isoform X3 [Gallus gallus];gi|971435204|ref|XP_015155001.1|//PREDICTED: gasdermin-A isoform X4 [Gallus gallus];gi|971435200|ref|XP_015154999.1|//PREDICTED: gasdermin-A isoform X2 [Gallus gallus];gi|971435198|ref|XP_015154998.1|//PREDICTED: gasdermin-A isoform X1 [Gallus gallus];gi|71897107|ref|NP_001026532.1|//gasdermin-A [Gallus gallus]
418882	2767	761	147	-2.36025	1.37034e-98	Down	2.39585e-99	CKAP2	NA	NA	NA	K16769//cytoskeleton-associated protein 2	gi|57529292|ref|NP_001006274.1|//cytoskeleton-associated protein 2 [Gallus gallus]
100859374	2021	1488.46	545.86	-1.43539	2.83637e-98	Down	4.96955e-99	LOC100859374	NA	NA	NA	K06751//major histocompatibility complex, class I	gi|971444454|ref|XP_015157571.1|//PREDICTED: class I histocompatibility antigen, F10 alpha chain-like isoform X3 [Gallus gallus];gi|971444450|ref|XP_015157569.1|//PREDICTED: class I histocompatibility antigen, F10 alpha chain-like isoform X1 [Gallus gallus];gi|971444452|ref|XP_015157570.1|//PREDICTED: class I histocompatibility antigen, F10 alpha chain-like isoform X2 [Gallus gallus]
414832	1637	466	29	-3.99438	3.78369e-98	Down	6.6434e-99	CYP3A7	GO:0016324//apical plasma membrane;GO:0016021//integral component of membrane	GO:0020037//heme binding;GO:0005506//iron ion binding;GO:0050649//testosterone 6-beta-hydroxylase activity;GO:0016712//oxidoreductase activity, acting on paired donors, with incorporation or reduction of molecular oxygen, reduced flavin or flavoprotein as one donor, and incorporation of one atom of oxygen;GO:0019825//oxygen binding;GO:0032451//demethylase activity	GO:0042448//progesterone metabolic process;GO:1901615//organic hydroxy compound metabolic process;GO:0017144//drug metabolic process;GO:0070988//demethylation;GO:0046677//response to antibiotic;GO:0097176//epoxide metabolic process;GO:0043390//aflatoxin B1 metabolic process;GO:0070995//NADPH oxidation	K07424//cytochrome P450 family 3 subfamily A [EC:1.14.14.1]	gi|48976101|ref|NP_001001751.1|//cytochrome P450 A 37 [Gallus gallus]
429111	2081	472	33.42	-3.80817	2.05958e-96	Down	3.68517e-97	C8A	GO:0070062//extracellular exosome;GO:0072562//blood microparticle;GO:0005579//membrane attack complex	NA	GO:0006956//complement activation	K03997//complement component 8 subunit alpha	gi|118094713|ref|XP_426667.2|//PREDICTED: complement component C8 alpha chain [Gallus gallus]
428928	6910	2523	1239	-1.01413	2.9396e-96	Down	5.27071e-97	NIN	GO:0000922//spindle pole;GO:0000242//pericentriolar material;GO:0005730//nucleolus	GO:0005509//calcium ion binding	GO:0034454//microtubule anchoring at centrosome	K16476//ninein	gi|363735030|ref|XP_426482.3|//PREDICTED: ninein isoform X1 [Gallus gallus];gi|971400816|ref|XP_004936565.2|//PREDICTED: ninein isoform X4 [Gallus gallus];gi|971400812|ref|XP_004936561.2|//PREDICTED: ninein isoform X2 [Gallus gallus];gi|971400818|ref|XP_004936566.2|//PREDICTED: ninein isoform X5 [Gallus gallus];gi|971400820|ref|XP_015132226.1|//PREDICTED: ninein isoform X6 [Gallus gallus];gi|9714…
395570	5781	1738.35	713.99	-1.27191	2.03437e-95	Down	3.65897e-96	TOP2A	GO:0005654//nucleoplasm;GO:0009295//nucleoid;GO:0009330//DNA topoisomerase complex (ATP-hydrolyzing)	GO:0000287//magnesium ion binding;GO:0005524//ATP binding;GO:0008144//drug binding;GO:0003918//DNA topoisomerase type II (ATP-hydrolyzing) activity;GO:0008301//DNA binding, bending	GO:0000712//resolution of meiotic recombination intermediates;GO:0000819//sister chromatid segregation;GO:0006266//DNA ligation;GO:0006268//DNA unwinding involved in DNA replication;GO:0044774//mitotic DNA integrity checkpoint;GO:0048511//rhythmic process;GO:0043065//positive regulation of apoptotic process;GO:0030263//apoptotic chromosome condensation;GO:0006312//mitotic recombination;GO:0006974…	K03164//DNA topoisomerase II [EC:5.99.1.3]	gi|45382161|ref|NP_990122.1|//DNA topoisomerase 2-alpha [Gallus gallus]
428862	7419	990	269	-1.86799	2.46706e-95	Down	4.44637e-96	LRRC4C	GO:0005615//extracellular space;GO:0016021//integral component of membrane;GO:0005737//cytoplasm	GO:0004860//protein kinase inhibitor activity	GO:0006469//negative regulation of protein kinase activity;GO:0046426//negative regulation of JAK-STAT cascade;GO:0019221//cytokine-mediated signaling pathway;GO:0050770//regulation of axonogenesis	K07523//netrin-G1 ligand	gi|513187120|ref|XP_004941608.1|//PREDICTED: leucine-rich repeat-containing protein 4C [Gallus gallus]
771679	784	456.18	29.52	-3.93801	2.81363e-95	Down	5.08148e-96	CCLI8	GO:0005615//extracellular space	GO:0008009//chemokine activity;GO:0048020//CCR chemokine receptor binding	GO:0007186//G-protein coupled receptor signaling pathway;GO:0048247//lymphocyte chemotaxis;GO:0030593//neutrophil chemotaxis;GO:0070098//chemokine-mediated signaling pathway;GO:0043547//positive regulation of GTPase activity;GO:0050729//positive regulation of inflammatory response;GO:0071356//cellular response to tumor necrosis factor;GO:0071346//cellular response to interferon-gamma;GO:0071347//…	K05408//C-C motif chemokine 3	gi|348591871|emb|CCC15114.1|//chemokine [Gallus gallus]
771008	2200	713	133	-2.41065	9.44573e-95	Down	1.71119e-95	EN1	NA	NA	NA	K09319//homeobox protein engrailed	gi|971406158|ref|XP_001234329.4|//PREDICTED: homeobox protein engrailed-1 [Gallus gallus]
421321	7252	2362.42	1139.45	-1.0401	5.42903e-94	Down	9.8958e-95	EPHX1	NA	GO:0033961//cis-stilbene-oxide hydrolase activity	NA	K01253//microsomal epoxide hydrolase [EC:3.3.2.9]	gi|118087829|ref|XP_419386.2|//PREDICTED: epoxide hydrolase 1 [Gallus gallus]
423457	4305	555	69	-2.99599	4.98203e-93	Down	9.10883e-94	SLC25A47	GO:0016021//integral component of membrane;GO:0005739//mitochondrion	GO:0003735//structural constituent of ribosome	GO:0055085//transmembrane transport;GO:0006412//translation	K15123//solute carrier family 25, member 45/47	gi|971400253|ref|XP_015143273.1|//PREDICTED: solute carrier family 25 member 47 isoform X6 [Gallus gallus];gi|513189096|ref|XP_004936368.1|//PREDICTED: solute carrier family 25 member 47 isoform X1 [Gallus gallus];gi|971400244|ref|XP_004936369.2|//PREDICTED: solute carrier family 25 member 47 isoform X2 [Gallus gallus];gi|363734849|ref|XP_421367.3|//PREDICTED: solute carrier family 25 member 47 i…
107054900	3033	979.53	2090.09	1.10523	1.40453e-92	Up	2.57841e-93	LOC107054900	NA	NA	NA	NA	gi|971427234|ref|XP_015151781.1|//PREDICTED: protein MANBAL-like isoform X2 [Gallus gallus]
426932	3221	1217	405	-1.57551	2.61489e-92	Down	4.81981e-93	BBOX1	GO:0070062//extracellular exosome;GO:0005739//mitochondrion	GO:0005506//iron ion binding;GO:0008270//zinc ion binding;GO:0008336//gamma-butyrobetaine dioxygenase activity	GO:0045329//carnitine biosynthetic process;GO:0055114//oxidation-reduction process	K00471//gamma-butyrobetaine dioxygenase [EC:1.14.11.1]	gi|513186044|ref|XP_004941389.1|//PREDICTED: gamma-butyrobetaine dioxygenase isoform X1 [Gallus gallus];gi|118091121|ref|XP_424543.2|//PREDICTED: gamma-butyrobetaine dioxygenase isoform X2 [Gallus gallus]
107052049	1459	910.85	236	-1.9366	4.14091e-92	Down	7.64799e-93	GPC3	GO:0070062//extracellular exosome;GO:0005764//lysosome;GO:0046658//anchored component of plasma membrane;GO:0005578//proteinaceous extracellular matrix	GO:0043395//heparan sulfate proteoglycan binding;GO:0060422//peptidyl-dipeptidase inhibitor activity	GO:0030324//lung development;GO:0072203//cell proliferation involved in metanephros development;GO:0045926//negative regulation of growth;GO:0030316//osteoclast differentiation;GO:0030513//positive regulation of BMP signaling pathway;GO:0045807//positive regulation of endocytosis;GO:0045879//negative regulation of smoothened signaling pathway;GO:0090090//negative regulation of canonical Wnt signa…	K08109//glypican 3	gi|971391846|ref|XP_015133937.1|//PREDICTED: glypican-3 isoform X2 [Gallus gallus];gi|971391844|ref|XP_015133936.1|//PREDICTED: glypican-3 isoform X1 [Gallus gallus];gi|971391848|ref|XP_015133938.1|//PREDICTED: glypican-3 isoform X3 [Gallus gallus]
428534	1581	1053.88	2189.47	1.0667	1.43654e-91	Up	2.66657e-92	SOX17	NA	NA	NA	K04495//transcription factor SOX17 (SOX group F)	gi|86129566|ref|NP_001034415.1|//transcription factor SOX-17 [Gallus gallus]
426922	855	1878	824	-1.17665	3.00089e-91	Down	5.58711e-92	RNF122	GO:0016021//integral component of membrane	GO:0008270//zinc ion binding	NA	K15699//RING finger protein 122	gi|971430104|ref|XP_015152922.1|//PREDICTED: RING finger protein 122 isoform X1 [Gallus gallus];gi|971430106|ref|XP_015152923.1|//PREDICTED: RING finger protein 122 isoform X2 [Gallus gallus]
101750251	1940	6.92	378.16	5.78391	1.12366e-90	Up	2.10041e-91	LOC101750251	NA	NA	NA	NA	gi|971377688|ref|XP_015132351.1|//PREDICTED: uncharacterized protein LOC107051825 [Gallus gallus]
101752042	1411	198.95	820.25	2.05549	1.93956e-90	Up	3.63275e-91	LOC101752042	NA	NA	NA	NA	gi|971427234|ref|XP_015151781.1|//PREDICTED: protein MANBAL-like isoform X2 [Gallus gallus];gi|971427258|ref|XP_015151787.1|//PREDICTED: uncharacterized protein LOC107054817 [Gallus gallus];gi|971444996|ref|XP_015157816.1|//PREDICTED: uncharacterized protein LOC107057295 isoform X2 [Gallus gallus]
427352	4081	965	274	-1.80452	9.40425e-89	Down	1.78588e-89	SLC1A1	GO:0070062//extracellular exosome;GO:0016324//apical plasma membrane;GO:0016021//integral component of membrane	GO:0017153//sodium:dicarboxylate symporter activity;GO:0033229//cysteine transmembrane transporter activity;GO:0015501//glutamate:sodium symporter activity	GO:0070779//D-aspartate import;GO:0010460//positive regulation of heart rate;GO:0089711//L-glutamate transmembrane transport;GO:0051260//protein homooligomerization;GO:1903712//cysteine transmembrane transport;GO:0051938//L-glutamate import	K05612//solute carrier family 1 (neuronal/epithelial high affinity glutamate transporter), member 1	gi|513229977|ref|XP_424930.4|//PREDICTED: excitatory amino acid transporter 3 [Gallus gallus]
395877	1932	876	228	-1.93007	2.97443e-88	Down	5.68169e-89	SERPIND1	GO:0070062//extracellular exosome;GO:0005615//extracellular space	NA	NA	K03912//heparin cofactor II	gi|118098359|ref|XP_001232767.1|//PREDICTED: heparin cofactor 2 [Gallus gallus]
100857299	1910	23.41	406.7	4.1306	2.97616e-88	Up	5.69053e-89	LOC100857299	NA	NA	NA	NA	gi|513231410|ref|XP_004949353.1|//PREDICTED: uncharacterized protein LOC100857299 [Gallus gallus]
427825	1676	617	104	-2.55686	8.50939e-88	Down	1.63336e-88	TLCD2	NA	NA	NA	K15447//tRNASer (uridine44-2'-O)-methyltransferase [EC:2.1.1.211]	gi|513215722|ref|XP_425399.3|//PREDICTED: TLC domain-containing protein 2 [Gallus gallus]
101751260	4089	318	1023	1.69754	3.803e-87	Up	7.32099e-88	SCEL	GO:0070062//extracellular exosome;GO:0005737//cytoplasm	GO:0008270//zinc ion binding	GO:0030216//keratinocyte differentiation;GO:0009790//embryo development	K06084//F-box protein 20;K16580//SLAIN motif-containing protein 1/2	gi|971377807|ref|XP_015132771.1|//PREDICTED: sciellin isoform X1 [Gallus gallus];gi|971377811|ref|XP_015132781.1|//PREDICTED: sciellin isoform X2 [Gallus gallus];gi|971377813|ref|XP_015132790.1|//PREDICTED: sciellin isoform X3 [Gallus gallus]
101749888	4758	1111	2234	1.0196	7.58292e-87	Up	1.46399e-87	IRS1	NA	NA	NA	K16172//insulin receptor substrate 1	gi|971410067|ref|XP_015132490.1|//PREDICTED: insulin receptor substrate 1 [Gallus gallus]
427639	4605	1296	473	-1.44232	2.25082e-86	Down	4.35389e-87	ARSI	NA	NA	NA	K12375//arylsulfatase I/J [EC:3.1.6.-]	gi|513206999|ref|XP_004945003.1|//PREDICTED: arylsulfatase I [Gallus gallus]
426987	1090	1094.66	2203.79	1.02133	6.29535e-86	Up	1.22243e-86	MRPS34	NA	NA	NA	K17412//small subunit ribosomal protein S34	gi|478431077|ref|NP_001264526.1|//28S ribosomal protein S34, mitochondrial [Gallus gallus]
107057172	1296	677.11	135.37	-2.31065	9.89424e-86	Down	1.92379e-86	LOC107057172	NA	NA	NA	K05109//Eph receptor A8 [EC:2.7.10.1];K00025//malate dehydrogenase [EC:1.1.1.37];K16803//cytoskeleton-associated protein 5;K01495//GTP cyclohydrolase I [EC:3.5.4.16]	gi|971444693|ref|XP_015157680.1|//PREDICTED: endogenous retrovirus group K member 18 Pol protein-like [Gallus gallus]
771806	1221	459	44	-3.37109	1.17444e-85	Down	2.28926e-86	TM4SF4	NA	NA	NA	NA	gi|118095403|ref|XP_001234023.1|//PREDICTED: transmembrane 4 L6 family member 4 [Gallus gallus]
427645	4601	1652	701	-1.2249	1.22819e-85	Down	2.39632e-86	PDE8B	NA	NA	NA	K18437//high affinity cAMP-specific and IBMX-insensitive 3',5'-cyclic phosphodiesterase 8 [EC:3.1.4.53]	gi|513229599|ref|XP_004937386.1|//PREDICTED: high affinity cAMP-specific and IBMX-insensitive 3',5'-cyclic phosphodiesterase 8B isoform X2 [Gallus gallus];gi|513229596|ref|XP_004937385.1|//PREDICTED: high affinity cAMP-specific and IBMX-insensitive 3',5'-cyclic phosphodiesterase 8B isoform X1 [Gallus gallus]
396451	4320	1545	631.99	-1.2778	1.41261e-85	Down	2.76138e-86	PTGS2	GO:0005634//nucleus;GO:0031090//organelle membrane;GO:0005789//endoplasmic reticulum membrane;GO:0043005//neuron projection	GO:0020037//heme binding;GO:0046872//metal ion binding;GO:0004601//peroxidase activity;GO:0004666//prostaglandin-endoperoxide synthase activity;GO:0019899//enzyme binding;GO:0042803//protein homodimerization activity;GO:0051213//dioxygenase activity	GO:0008217//regulation of blood pressure;GO:0019371//cyclooxygenase pathway;GO:0031622//positive regulation of fever generation;GO:0071456//cellular response to hypoxia;GO:0071498//cellular response to fluid shear stress;GO:0042127//regulation of cell proliferation;GO:0055114//oxidation-reduction process;GO:0006979//response to oxidative stress;GO:0098869//cellular oxidant detoxification;GO:00903…	K11987//prostaglandin-endoperoxide synthase 2 [EC:1.14.99.1]	gi|268370254|ref|NP_001161191.1|//prostaglandin G/H synthase 2 isoform 1 precursor [Gallus gallus];gi|268370250|ref|NP_001161190.1|//prostaglandin G/H synthase 2 isoform 2 [Gallus gallus]
423433	1711	377	16	-4.54659	3.68067e-85	Down	7.21557e-86	SERPINA4	NA	NA	NA	K04525//serpin peptidase inhibitor, clade A	gi|478246981|ref|NP_001264421.1|//serpin peptidase inhibitor, clade A (alpha-1 antiproteinase, antitrypsin), member 4 precursor [Gallus gallus]
396156	4183	998	304	-1.70314	9.29489e-85	Down	1.83081e-85	SMC2	GO:0000228//nuclear chromosome;GO:0070062//extracellular exosome;GO:0000796//condensin complex;GO:0005730//nucleolus;GO:0005737//cytoplasm	GO:0005524//ATP binding;GO:0046982//protein heterodimerization activity	GO:0051301//cell division;GO:0051383//kinetochore organization;GO:0010032//meiotic chromosome condensation;GO:0007076//mitotic chromosome condensation;GO:0045132//meiotic chromosome segregation	K06674//structural maintenance of chromosome 2	gi|45382553|ref|NP_990561.1|//structural maintenance of chromosomes protein 2 [Gallus gallus];gi|971440079|ref|XP_015136079.1|//PREDICTED: structural maintenance of chromosomes protein 2 isoform X1 [Gallus gallus]
395844	3550	1065.14	343.54	-1.62066	2.69464e-84	Down	5.3427e-85	ALDH1A2	GO:0005737//cytoplasm	GO:0004028//3-chloroallyl aldehyde dehydrogenase activity;GO:0001758//retinal dehydrogenase activity;GO:0004029//aldehyde dehydrogenase (NAD) activity	GO:0009952//anterior/posterior pattern specification;GO:0030324//lung development;GO:0060324//face development;GO:0034097//response to cytokine;GO:0042574//retinal metabolic process;GO:0048738//cardiac muscle tissue development;GO:0001568//blood vessel development;GO:0055114//oxidation-reduction process;GO:0003007//heart morphogenesis;GO:0042573//retinoic acid metabolic process;GO:0042904//9-cis-…	K07249//retinal dehydrogenase [EC:1.2.1.36]	gi|92087020|sp|O93344.2|AL1A2_CHICK//RecName: Full=Retinal dehydrogenase 2; Short=RALDH 2; Short=RalDH2; AltName: Full=Aldehyde dehydrogenase family 1 member A2; AltName: Full=Retinaldehyde-specific dehydrogenase type 2; Short=RALDH(II)
497217	2970	85.05	548.87	2.70191	1.07683e-83	Up	2.14506e-84	PCDHA7	GO:0016021//integral component of membrane;GO:0005886//plasma membrane	GO:0005509//calcium ion binding	GO:0007156//homophilic cell adhesion via plasma membrane adhesion molecules	K16493//protocadherin alpha	gi|162138884|ref|NP_001104607.1|//protocadherin alpha 7 precursor [Gallus gallus]
100857105	2341	1446	584	-1.2962	5.8861e-82	Down	1.18785e-82	SERPINF2	GO:0070062//extracellular exosome;GO:0005577//fibrinogen complex;GO:0009986//cell surface;GO:0072562//blood microparticle	GO:0002020//protease binding;GO:0004867//serine-type endopeptidase inhibitor activity;GO:0042803//protein homodimerization activity	GO:0046330//positive regulation of JNK cascade;GO:0010951//negative regulation of endopeptidase activity;GO:0010757//negative regulation of plasminogen activation;GO:0030199//collagen fibril organization;GO:0032967//positive regulation of collagen biosynthetic process;GO:0051918//negative regulation of fibrinolysis;GO:0051496//positive regulation of stress fiber assembly;GO:0002034//regulation of…	K03983//alpha-2-antiplasmin	gi|971426546|ref|XP_015151526.1|//PREDICTED: alpha-2-antiplasmin isoform X1 [Gallus gallus];gi|971426548|ref|XP_015151527.1|//PREDICTED: alpha-2-antiplasmin isoform X2 [Gallus gallus]
396157	8508	1945.34	920.03	-1.06844	4.3849e-81	Down	8.90605e-82	NTRK2	GO:0010008//endosome membrane;GO:0005887//integral component of plasma membrane;GO:0005829//cytosol;GO:0043195//terminal bouton;GO:0043235//receptor complex;GO:0045211//postsynaptic membrane	GO:0005004//GPI-linked ephrin receptor activity;GO:0005244//voltage-gated ion channel activity;GO:0048403//brain-derived neurotrophic factor binding;GO:0005524//ATP binding;GO:0060175//brain-derived neurotrophic factor-activated receptor activity;GO:0042803//protein homodimerization activity	GO:0007528//neuromuscular junction development;GO:0051896//regulation of protein kinase B signaling;GO:0048935//peripheral nervous system neuron development;GO:0051965//positive regulation of synapse assembly;GO:0021987//cerebral cortex development;GO:0001570//vasculogenesis;GO:0046548//retinal rod cell development;GO:0014068//positive regulation of phosphatidylinositol 3-kinase signaling;GO:0048…	K04360//neurotrophic tyrosine kinase receptor type 2 [EC:2.7.10.1]	gi|971439119|ref|XP_015135743.1|//PREDICTED: BDNF/NT-3 growth factors receptor isoform X8 [Gallus gallus];gi|971439107|ref|XP_015135737.1|//PREDICTED: BDNF/NT-3 growth factors receptor isoform X2 [Gallus gallus];gi|971439111|ref|XP_015135739.1|//PREDICTED: BDNF/NT-3 growth factors receptor isoform X4 [Gallus gallus];gi|472936|emb|CAA54469.1|//tyrosine kinase receptor [Gallus gallus];gi|971439105|…
420531	967	84	535	2.68291	5.1449e-81	Up	1.04592e-81	ACBD7	NA	NA	NA	K08762//diazepam-binding inhibitor (GABA receptor modulator, acyl-CoA-binding protein)	gi|971381462|ref|XP_015137477.1|//PREDICTED: acyl-CoA-binding domain-containing protein 7 isoform X1 [Gallus gallus];gi|118085711|ref|XP_429769.2|//PREDICTED: acyl-CoA-binding domain-containing protein 7 isoform X2 [Gallus gallus]
373903	6091	507	70	-2.84473	6.07095e-81	Down	1.23531e-81	DIO2	GO:0016021//integral component of membrane	GO:0004800//thyroxine 5'-deiodinase activity	GO:0042446//hormone biosynthetic process;GO:0006590//thyroid hormone generation;GO:0055114//oxidation-reduction process	K17904//type II thyroxine 5'-deiodinase [EC:1.21.99.4]	gi|156547239|ref|NP_989445.2|//type II iodothyronine deiodinase [Gallus gallus]
427309	2430	1195	434	-1.44941	2.45015e-80	Down	4.99466e-81	TMEM246	GO:0016021//integral component of membrane	NA	NA	K16897//two pore calcium channel protein 3;K12613//mRNA-decapping enzyme subunit 2 [EC:3.6.1.62]	gi|513232334|ref|XP_004949556.1|//PREDICTED: transmembrane protein 246 [Gallus gallus]
417122	6340	415	36	-3.51521	3.33814e-80	Down	6.81106e-81	C5	NA	NA	NA	K03994//complement component 5	gi|513213068|ref|XP_415405.4|//PREDICTED: complement C5 [Gallus gallus]
396252	1203	972	308	-1.6462	9.14169e-79	Down	1.88735e-79	CDK1	GO:0016020//membrane;GO:0070062//extracellular exosome;GO:0072686//mitotic spindle;GO:0000784//nuclear chromosome, telomeric region;GO:0005654//nucleoplasm;GO:0005813//centrosome;GO:0005737//cytoplasm;GO:0030496//midbody;GO:0005876//spindle microtubule	GO:0008353//RNA polymerase II carboxy-terminal domain kinase activity;GO:0004693//cyclin-dependent protein serine/threonine kinase activity;GO:0005524//ATP binding;GO:0035173//histone kinase activity;GO:0030544//Hsp70 protein binding	GO:1900182//positive regulation of protein localization to nucleus;GO:0007095//mitotic G2 DNA damage checkpoint;GO:0043066//negative regulation of apoptotic process;GO:0034605//cellular response to heat;GO:0018107//peptidyl-threonine phosphorylation;GO:0034501//protein localization to kinetochore;GO:0018105//peptidyl-serine phosphorylation;GO:0051301//cell division;GO:0000724//double-strand break…	K02087//cyclin-dependent kinase 1 [EC:2.7.11.22 2.7.11.23]	gi|45384336|ref|NP_990645.1|//cyclin-dependent kinase 1 [Gallus gallus];gi|971401206|ref|XP_015143549.1|//PREDICTED: cyclin-dependent kinase 1 isoform X1 [Gallus gallus]
422982	2484	1659	739	-1.15484	1.88757e-78	Down	3.91804e-79	DHCR7	NA	NA	NA	K00213//7-dehydrocholesterol reductase [EC:1.3.1.21]	gi|313747479|ref|NP_001186419.1|//7-dehydrocholesterol reductase [Gallus gallus]
417231	7003	910	1884	1.06169	2.07081e-78	Up	4.30225e-79	COL27A1	GO:0005583//fibrillar collagen trimer	GO:0005201//extracellular matrix structural constituent	GO:0030198//extracellular matrix organization;GO:0003431//growth plate cartilage chondrocyte development	K19721//collagen, type V/XI/XXIV/XXVII, alpha	gi|363740415|ref|XP_415514.3|//PREDICTED: collagen alpha-1(XXVII) chain isoform X2 [Gallus gallus];gi|971423518|ref|XP_015135184.1|//PREDICTED: collagen alpha-1(XXVII) chain isoform X1 [Gallus gallus];gi|971423523|ref|XP_015135186.1|//PREDICTED: collagen alpha-1(XXVII) chain isoform X3 [Gallus gallus]
770582	1140	352.45	2.01	-7.44225	2.5491e-78	Down	5.30543e-79	GPR25	GO:0005737//cytoplasm;GO:0005886//plasma membrane	GO:0060182//apelin receptor activity	GO:0001569//branching involved in blood vessel morphogenesis;GO:0060183//apelin receptor signaling pathway	K04174//apelin receptor	gi|971421003|ref|XP_015130873.1|//PREDICTED: apelin receptor A-like [Gallus gallus]
421534	1395	1832.48	859.33	-1.08068	7.16056e-78	Down	1.49964e-78	ACTA1	GO:0070062//extracellular exosome;GO:0072562//blood microparticle;GO:0030027//lamellipodium;GO:0030175//filopodium;GO:0005884//actin filament;GO:0005865//striated muscle thin filament;GO:0001725//stress fiber;GO:0044297//cell body;GO:0005829//cytosol;GO:0043234//protein complex	GO:0043531//ADP binding;GO:0005524//ATP binding;GO:0042802//identical protein binding;GO:0017022//myosin binding;GO:0005200//structural constituent of cytoskeleton;GO:0048306//calcium-dependent protein binding	GO:0009612//response to mechanical stimulus;GO:0009991//response to extracellular stimulus;GO:0030049//muscle filament sliding;GO:0010226//response to lithium ion;GO:0010628//positive regulation of gene expression;GO:0016049//cell growth;GO:0048741//skeletal muscle fiber development;GO:0043503//skeletal muscle fiber adaptation;GO:0090131//mesenchyme migration;GO:0048545//response to steroid hormo…	K10354//actin, alpha skeletal muscle	gi|4501881|ref|NP_001091.1|//actin, alpha skeletal muscle [Homo sapiens];gi|971387708|ref|XP_015139542.1|//PREDICTED: actin, alpha skeletal muscle isoform X1 [Gallus gallus]
107050528	1009	466.02	59.32	-2.96197	1.63382e-77	Down	3.43084e-78	LOC107050528	NA	NA	NA	NA	gi|971450087|ref|XP_015129743.1|//PREDICTED: TANK-binding kinase 1-binding protein 1-like [Gallus gallus]
416220	4396	940.29	294.8	-1.66154	3.04213e-77	Down	6.40512e-78	KIF20A	NA	NA	NA	K10402//kinesin family member 20	gi|61098268|ref|NP_001012801.1|//kinesin-like protein KIF20A [Gallus gallus]
415852	1558	1525	656	-1.20521	3.29279e-77	Down	6.939e-78	LOC415852	NA	NA	NA	K01015//alcohol sulfotransferase [EC:2.8.2.2]	gi|363738353|ref|XP_414212.3|//PREDICTED: sulfotransferase family cytosolic 2B member 1-like [Gallus gallus]
415706	2576	1791	836	-1.08736	6.80386e-77	Down	1.43886e-77	OSGIN1	NA	GO:0008083//growth factor activity;GO:0016491//oxidoreductase activity	GO:0030308//negative regulation of cell growth;GO:0043065//positive regulation of apoptotic process;GO:0055114//oxidation-reduction process	NA	gi|118096257|ref|XP_414073.2|//PREDICTED: oxidative stress-induced growth inhibitor 1 [Gallus gallus]
424669	4078	446	54	-3.03418	5.93287e-76	Down	1.26901e-76	C8B	NA	NA	NA	K03998//complement component 8 subunit beta	gi|733901310|ref|XP_010714378.1|//PREDICTED: complement component C8 beta chain [Meleagris gallopavo]
414746	2845	426.91	46.77	-3.17845	6.84686e-76	Down	1.46706e-76	CYP2H1	GO:0031090//organelle membrane;GO:0005789//endoplasmic reticulum membrane	GO:0008395//steroid hydroxylase activity;GO:0020037//heme binding;GO:0005506//iron ion binding;GO:0070330//aromatase activity;GO:0008392//arachidonic acid epoxygenase activity	GO:0042493//response to drug;GO:0055114//oxidation-reduction process;GO:0019373//epoxygenase P450 pathway	K17853//cytochrome P450 family 2 subfamily H	gi|48675895|ref|NP_001001616.1|//cytochrome P450 2H1 precursor [Gallus gallus]
396336	3563	1436	606	-1.23284	2.1771e-75	Down	4.70125e-76	NCS1	GO:0030424//axon;GO:0030425//dendrite;GO:0070062//extracellular exosome;GO:0030054//cell junction;GO:0014069//postsynaptic density;GO:0048471//perinuclear region of cytoplasm;GO:0005829//cytosol;GO:0005794//Golgi apparatus;GO:0031045//dense core granule;GO:0045211//postsynaptic membrane	GO:0000287//magnesium ion binding;GO:0005245//voltage-gated calcium channel activity;GO:0005509//calcium ion binding;GO:0008427//calcium-dependent protein kinase inhibitor activity;GO:0019901//protein kinase binding	GO:0070588//calcium ion transmembrane transport;GO:0006469//negative regulation of protein kinase activity;GO:0050806//positive regulation of synaptic transmission;GO:0045921//positive regulation of exocytosis;GO:0048015//phosphatidylinositol-mediated signaling;GO:0010975//regulation of neuron projection development	K19932//neuronal calcium sensor 1	gi|9790115|ref|NP_062655.1|//neuronal calcium sensor 1 [Mus musculus];gi|971422693|ref|XP_015134824.1|//PREDICTED: neuronal calcium sensor 1 isoform X1 [Gallus gallus]
107057057	1030	268.21	871.6	1.71213	2.31334e-75	Up	4.99976e-76	LOC107057057	GO:0005654//nucleoplasm;GO:0005739//mitochondrion	GO:0004844//uracil DNA N-glycosylase activity	GO:0045008//depyrimidination	K03648//uracil-DNA glycosylase [EC:3.2.2.27]	gi|971444345|ref|XP_015157523.1|//PREDICTED: uracil-DNA glycosylase-like [Gallus gallus]
771005	2119	1061	372	-1.50022	3.46186e-75	Down	7.49489e-76	XKRX	GO:0016021//integral component of membrane	NA	NA	K19522//membrane transport protein XK	gi|513180713|ref|XP_004940756.1|//PREDICTED: XK-related protein 2 isoform X2 [Gallus gallus];gi|513180710|ref|XP_004940755.1|//PREDICTED: XK-related protein 2 isoform X1 [Gallus gallus]
415989	3766	816	1722	1.08927	8.46377e-75	Up	1.84184e-75	FGD3	NA	GO:0046872//metal ion binding;GO:0005089//Rho guanyl-nucleotide exchange factor activity	GO:0035023//regulation of Rho protein signal transduction;GO:0043547//positive regulation of GTPase activity	K05722//FYVE, RhoGEF and PH domain containing 3	gi|971416925|ref|XP_015148896.1|//PREDICTED: FYVE, RhoGEF and PH domain-containing protein 3 isoform X5 [Gallus gallus];gi|971416921|ref|XP_015148894.1|//PREDICTED: FYVE, RhoGEF and PH domain-containing protein 3 isoform X3 [Gallus gallus];gi|971416919|ref|XP_015148893.1|//PREDICTED: FYVE, RhoGEF and PH domain-containing protein 3 isoform X2 [Gallus gallus];gi|971416923|ref|XP_015148895.1|//PREDI…
429941	2666	438	55	-2.9816	2.08451e-73	Down	4.60213e-74	ISLR2	GO:0016021//integral component of membrane	NA	NA	K07523//netrin-G1 ligand;K19511//peroxidase [EC:1.11.1.7];K16357//leucine-rich repeat and fibronectin type-III domain-containing protein 4;K18139//null	gi|113206126|ref|NP_001038132.1|//immunoglobulin superfamily containing leucine-rich repeat protein 2 precursor [Gallus gallus]
427629	2906	107	553	2.3815	2.13153e-73	Up	4.70988e-74	MXD3	NA	NA	NA	K12482//RUN and FYVE domain-containing protein 1;K17603//zinc finger FYVE domain-containing protein 1	gi|971417990|ref|XP_015149344.1|//PREDICTED: lateral signaling target protein 2 homolog isoform X1 [Gallus gallus];gi|971417992|ref|XP_015149345.1|//PREDICTED: lateral signaling target protein 2 homolog isoform X2 [Gallus gallus]
427391	1558	841	252	-1.72685	4.81385e-73	Down	1.06816e-73	CDO1	NA	NA	NA	K00456//cysteine dioxygenase [EC:1.13.11.20]	gi|118104563|ref|XP_424964.2|//PREDICTED: cysteine dioxygenase type 1 [Gallus gallus]
419251	3604	24	346	3.8615	2.58136e-72	Up	5.78067e-73	OPRL1	GO:0016021//integral component of membrane	GO:0001626//nociceptin receptor activity	GO:0038003//opioid receptor signaling pathway	K04216//nociceptin receptor	gi|974757629|ref|NP_001305908.1|//nociceptin receptor isoform 1x [Gallus gallus];gi|694859865|ref|XP_009471711.1|//PREDICTED: nociceptin receptor [Nipponia nippon]
418616	8185	715.86	1558.19	1.13395	2.81642e-72	Up	6.3123e-73	NHS	NA	NA	NA	NA	gi|971376097|ref|XP_015128472.1|//PREDICTED: Nance-Horan syndrome protein isoform X3 [Gallus gallus];gi|971376093|ref|XP_015128470.1|//PREDICTED: Nance-Horan syndrome protein isoform X1 [Gallus gallus];gi|971376095|ref|XP_015128471.1|//PREDICTED: Nance-Horan syndrome protein isoform X2 [Gallus gallus]
107049387	1612	0	413.46	9.70343	4.69842e-72	Up	1.05653e-72	LOC107049387	NA	NA	NA	K14165//atypical dual specificity phosphatase [EC:3.1.3.16 3.1.3.48];K04257//olfactory receptor	gi|971446707|ref|XP_015128355.1|//PREDICTED: coiled-coil domain-containing protein 81-like isoform X5 [Gallus gallus];gi|971446709|ref|XP_015128356.1|//PREDICTED: coiled-coil domain-containing protein 81-like isoform X6 [Gallus gallus];gi|971446715|ref|XP_015128359.1|//PREDICTED: coiled-coil domain-containing protein 81-like isoform X9 [Gallus gallus];gi|971446705|ref|XP_015128352.1|//PREDICTED: …
395399	909	955	1898	1.00274	4.72566e-72	Up	1.06353e-72	CITED2	GO:0000790//nuclear chromatin	GO:0001105//RNA polymerase II transcription coactivator activity;GO:0003682//chromatin binding;GO:0046332//SMAD binding;GO:0001102//RNA polymerase II activating transcription factor binding;GO:0003700//transcription factor activity, sequence-specific DNA binding	GO:0060412//ventricular septum morphogenesis;GO:0002089//lens morphogenesis in camera-type eye;GO:0061308//cardiac neural crest cell development involved in heart development;GO:0070986//left/right axis specification;GO:0030851//granulocyte differentiation;GO:0001570//vasculogenesis;GO:1900164//nodal signaling pathway involved in determination of lateral mesoderm left/right asymmetry;GO:0060349//…	K02987//small subunit ribosomal protein S4e	gi|45598375|ref|NP_996726.1|//cbp/p300-interacting transactivator 2 [Gallus gallus]
769704	2330	1751.04	836.04	-1.05474	1.18689e-71	Down	2.68661e-72	LOC769704	GO:0005615//extracellular space	GO:0052689//carboxylic ester hydrolase activity	NA	K01044//carboxylesterase 1 [EC:3.1.1.1]	gi|971414542|ref|XP_015147944.1|//PREDICTED: fatty acyl-CoA hydrolase precursor, medium chain-like isoform X3 [Gallus gallus];gi|971414536|ref|XP_015147941.1|//PREDICTED: fatty acyl-CoA hydrolase precursor, medium chain-like isoform X1 [Gallus gallus];gi|971414540|ref|XP_015147943.1|//PREDICTED: fatty acyl-CoA hydrolase precursor, medium chain-like isoform X2 [Gallus gallus]
771702	4900	1070	391	-1.44054	1.86907e-71	Down	4.2412e-72	SPAG5	NA	NA	NA	K17529//uncharacterized serine/threonine-protein kinase SgK494 [EC:2.7.11.1];K05291//phosphatidylinositol glycan, class S	gi|971426641|ref|XP_015151563.1|//PREDICTED: sperm-associated antigen 5 [Gallus gallus]
768624	1699	550	1304	1.25727	2.8545e-71	Up	6.50915e-72	TTC9	NA	NA	NA	K09571//FK506-binding protein 4/5 [EC:5.2.1.8];K09572//FK506-binding protein 6 [EC:5.2.1.8];K05864//peptidyl-prolyl isomerase D [EC:5.2.1.8];K20097//FK506-binding protein-like	gi|971399545|ref|XP_001231669.3|//PREDICTED: tetratricopeptide repeat protein 9A [Gallus gallus]
423213	2466	650	156	-2.04706	4.78963e-71	Down	1.09397e-71	NUSAP1	GO:0005730//nucleolus;GO:0005737//cytoplasm;GO:0005876//spindle microtubule	GO:0003677//DNA binding;GO:0008017//microtubule binding	GO:0000281//mitotic cytokinesis;GO:0040001//establishment of mitotic spindle localization;GO:0045840//positive regulation of mitotic nuclear division;GO:0007076//mitotic chromosome condensation	NA	gi|71894849|ref|NP_001026364.1|//nucleolar and spindle-associated protein 1 [Gallus gallus]
776920	1084	1481	656	-1.16297	5.56335e-71	Down	1.27172e-71	SIGLEC1	NA	NA	NA	K06548//sialoadhesin	gi|971452202|ref|XP_015130613.1|//PREDICTED: sialoadhesin-like, partial [Gallus gallus]
100125831	950	910	1826	1.01658	6.23307e-71	Up	1.42829e-71	NDNL2	NA	NA	NA	K12464//melanoma-associated antigen D1	gi|157311610|ref|NP_001098534.1|//melanoma-associated antigen G1 [Gallus gallus]
395081	3818	1053	383	-1.44726	7.91089e-71	Down	1.81717e-71	TPX2	GO:0000922//spindle pole;GO:0005654//nucleoplasm;GO:0005874//microtubule;GO:0043203//axon hillock	GO:0061676//importin-alpha family protein binding;GO:0019901//protein kinase binding	GO:0090307//mitotic spindle assembly;GO:0032147//activation of protein kinase activity;GO:0060236//regulation of mitotic spindle organization	K16812//targeting protein for Xklp2	gi|45383291|ref|NP_989768.1|//targeting protein for Xklp2 [Gallus gallus];gi|971427320|ref|XP_015151810.1|//PREDICTED: targeting protein for Xklp2 isoform X2 [Gallus gallus];gi|971427322|ref|XP_015151811.1|//PREDICTED: targeting protein for Xklp2 isoform X3 [Gallus gallus];gi|971427318|ref|XP_015151809.1|//PREDICTED: targeting protein for Xklp2 isoform X1 [Gallus gallus]
418190	2713	332.07	20.82	-3.98362	2.83225e-70	Down	6.57956e-71	SLCO1A2	GO:0005887//integral component of plasma membrane	GO:0015125//bile acid transmembrane transporter activity;GO:0015347//sodium-independent organic anion transmembrane transporter activity	GO:0043252//sodium-independent organic anion transport;GO:0098779//positive regulation of mitophagy in response to mitochondrial depolarization;GO:0015721//bile acid and bile salt transport;GO:0008206//bile acid metabolic process	K03460//solute carrier organic anion transporter family, member 1A	gi|971373368|ref|XP_015147275.1|//PREDICTED: solute carrier organic anion transporter family member 1A2 [Gallus gallus]
373912	672	3	296	6.63632	6.64031e-70	Up	1.55125e-70	NOG	GO:0005615//extracellular space;GO:0005623//cell	GO:0019955//cytokine binding;GO:0042803//protein homodimerization activity	GO:0060044//negative regulation of cardiac muscle cell proliferation;GO:0060272//embryonic skeletal joint morphogenesis;GO:0048712//negative regulation of astrocyte differentiation;GO:0060425//lung morphogenesis;GO:0061053//somite development;GO:0035019//somatic stem cell population maintenance;GO:0090090//negative regulation of canonical Wnt signaling pathway;GO:0021533//cell differentiation in …	K04658//noggin	gi|45383860|ref|NP_989454.1|//noggin precursor [Gallus gallus]
416408	1544	878	1771	1.0241	1.14368e-69	Up	2.68452e-70	2020-09-12	GO:0097227//sperm annulus;GO:0005819//spindle;GO:0030496//midbody;GO:0048471//perinuclear region of cytoplasm	GO:0005525//GTP binding;GO:0042803//protein homodimerization activity	NA	K16938//septin 3/9/12	gi|513209335|ref|XP_004945472.1|//PREDICTED: septin-12 isoform X1 [Gallus gallus];gi|513209338|ref|XP_004945473.1|//PREDICTED: septin-12 isoform X2 [Gallus gallus]
427914	4451	634.51	1419.6	1.1736	1.22996e-69	Up	2.88933e-70	NT5DC3	NA	NA	NA	K01081//5'-nucleotidase [EC:3.1.3.5]	gi|513159680|ref|XP_425487.4|//PREDICTED: 5'-nucleotidase domain-containing protein 3 [Gallus gallus]
395979	1408	347.86	27.51	-3.64865	2.21628e-69	Down	5.22694e-70	ADH6	NA	GO:0008270//zinc ion binding;GO:0016491//oxidoreductase activity	GO:0055114//oxidation-reduction process	K13951//alcohol dehydrogenase 1/7 [EC:1.1.1.1]	gi|45384164|ref|NP_990423.1|//alcohol dehydrogenase 6 [Gallus gallus]
418769	5573	916.13	307.8	-1.56173	5.20761e-69	Down	1.23399e-69	ITGBL1	NA	NA	NA	K06252//tenascin	gi|513164595|ref|XP_416966.3|//PREDICTED: integrin beta-like protein 1 [Gallus gallus]
395357	9169	642	158	-2.01082	1.26135e-68	Down	3.0053e-69	CENPF	GO:0000922//spindle pole;GO:0005654//nucleoplasm;GO:0005635//nuclear envelope;GO:0005813//centrosome;GO:0016363//nuclear matrix;GO:0005737//cytoplasm;GO:0030496//midbody;GO:0036064//ciliary basal body;GO:0000776//kinetochore;GO:0097539//ciliary transition fiber;GO:0005930//axoneme;GO:0045120//pronucleus	GO:0008022//protein C-terminus binding;GO:0008134//transcription factor binding;GO:0042803//protein homodimerization activity	GO:0045892//negative regulation of transcription, DNA-templated;GO:0001822//kidney development;GO:0010389//regulation of G2/M transition of mitotic cell cycle;GO:0016202//regulation of striated muscle tissue development;GO:0051310//metaphase plate congression;GO:0015031//protein transport;GO:0021591//ventricular system development	K11499//centromere protein F	gi|971386576|ref|XP_015139102.1|//PREDICTED: centromere protein F isoform X2 [Gallus gallus];gi|157168357|ref|NP_989976.2|//centromere protein F [Gallus gallus];gi|971386570|ref|XP_015139099.1|//PREDICTED: centromere protein F isoform X1 [Gallus gallus]
420266	1739	518	98	-2.39027	1.33994e-68	Down	3.19505e-69	DPYS	NA	NA	NA	K01464//dihydropyrimidinase [EC:3.5.2.2]	gi|476007898|ref|NP_001264355.1|//dihydropyrimidinase isoform 1 [Gallus gallus];gi|476007900|ref|NP_001264356.1|//dihydropyrimidinase isoform 2 [Gallus gallus];gi|971384738|ref|XP_015138464.1|//PREDICTED: dihydropyrimidinase isoform X1 [Gallus gallus]
422858	4162	587	1341	1.20371	1.65328e-68	Up	3.94527e-69	PPP2R2C	GO:0000159//protein phosphatase type 2A complex	NA	NA	K04354//serine/threonine-protein phosphatase 2A regulatory subunit B	gi|363733830|ref|XP_003641302.1|//PREDICTED: protein phosphatase 2, regulatory subunit B, gamma isoform X1 [Gallus gallus];gi|971395687|ref|XP_015141314.1|//PREDICTED: protein phosphatase 2, regulatory subunit B, gamma isoform X7 [Gallus gallus];gi|50747248|ref|XP_420804.1|//PREDICTED: protein phosphatase 2, regulatory subunit B, gamma isoform X6 [Gallus gallus];gi|513184902|ref|XP_004936236.1|//…
424028	1994	414.3	54	-2.92781	2.47718e-68	Down	5.92058e-69	LOC424028	GO:0016021//integral component of membrane	GO:0015020//glucuronosyltransferase activity	GO:0008152//metabolic process	K00699//glucuronosyltransferase [EC:2.4.1.17]	gi|971404321|ref|XP_015144739.1|//PREDICTED: UDP-glucuronosyltransferase 1-1 isoform X5 [Gallus gallus];gi|971404329|ref|XP_015144744.1|//PREDICTED: UDP-glucuronosyltransferase 1-1 isoform X9 [Gallus gallus];gi|971404315|ref|XP_015144736.1|//PREDICTED: UDP-glucuronosyltransferase 1-1 isoform X2 [Gallus gallus];gi|971404323|ref|XP_015144740.1|//PREDICTED: UDP-glucuronosyltransferase 1-9 isoform X6…
374267	1348	356	32	-3.4639	2.96304e-68	Down	7.09832e-69	MBL2	GO:0005576//extracellular region;GO:0005581//collagen trimer	GO:0030246//carbohydrate binding	GO:0001867//complement activation, lectin pathway	K03991//mannose-binding lectin	gi|326633216|ref|NP_989680.2|//pulmonary surfactant-associated protein D precursor [Gallus gallus];gi|971400961|ref|XP_015143439.1|//PREDICTED: pulmonary surfactant-associated protein D isoform X2 [Gallus gallus]
101751055	3169	964	339	-1.49592	3.50345e-68	Down	8.39947e-69	LOC101751055	NA	NA	NA	K00273//D-amino-acid oxidase [EC:1.4.3.3]	gi|971421403|ref|XP_015131013.1|//PREDICTED: D-amino-acid oxidase isoform X5 [Gallus gallus];gi|971421391|ref|XP_015131007.1|//PREDICTED: D-amino-acid oxidase isoform X1 [Gallus gallus];gi|971421401|ref|XP_015131012.1|//PREDICTED: D-amino-acid oxidase isoform X4 [Gallus gallus];gi|971421399|ref|XP_015131011.1|//PREDICTED: D-amino-acid oxidase isoform X3 [Gallus gallus];gi|971421395|ref|XP_0151310…
769143	1563	1733	843	-1.02784	4.62423e-68	Down	1.11037e-68	CPN1	NA	NA	NA	K01292//carboxypeptidase N catalytic subunit [EC:3.4.17.3]	gi|471014333|ref|NP_001264183.1|//carboxypeptidase N catalytic chain precursor [Gallus gallus]
396471	1041	170	654	1.95559	5.71304e-68	Up	1.37394e-68	LECT2	GO:0005615//extracellular space;GO:0044194//cytolytic granule	GO:0042802//identical protein binding	GO:0046677//response to antibiotic;GO:0030851//granulocyte differentiation	NA	gi|758818508|ref|NP_990809.2|//myeloid protein 1 precursor [Gallus gallus]
100858617	1843	346.79	29.14	-3.56116	5.93131e-68	Down	1.42754e-68	LOC100858617	NA	NA	NA	K01081//5'-nucleotidase [EC:3.1.3.5]	gi|971430258|ref|XP_015152992.1|//PREDICTED: 5'-nucleotidase domain-containing protein 4 isoform X3 [Gallus gallus];gi|971430254|ref|XP_015152990.1|//PREDICTED: 5'-nucleotidase domain-containing protein 4 isoform X1 [Gallus gallus];gi|971430256|ref|XP_015152991.1|//PREDICTED: 5'-nucleotidase domain-containing protein 4 isoform X2 [Gallus gallus]
373927	3803	1443	648	-1.14318	2.24819e-67	Down	5.45691e-68	CDH20	GO:0016021//integral component of membrane;GO:0005886//plasma membrane	GO:0005509//calcium ion binding	GO:0007156//homophilic cell adhesion via plasma membrane adhesion molecules	K06807//cadherin 20, type 2	gi|45383842|ref|NP_989465.1|//cadherin-20 precursor [Gallus gallus]
107052380	2025	969.03	347.37	-1.46824	1.07004e-66	Down	2.61516e-67	LOC107052380	NA	NA	NA	K04257//olfactory receptor;K21125//mucin-5AC;K01495//GTP cyclohydrolase I [EC:3.5.4.16];K05249//neuromedin U	gi|971440190|ref|XP_015136135.1|//PREDICTED: endogenous retrovirus group K member 25 Pol protein-like [Gallus gallus]
420737	5086	886	299	-1.55533	2.10307e-66	Down	5.15551e-67	AOAH	NA	NA	NA	K01065//acyloxyacyl hydrolase [EC:3.1.1.77]	gi|513169673|ref|XP_418835.3|//PREDICTED: acyloxyacyl hydrolase isoform X1 [Gallus gallus];gi|513169682|ref|XP_004939590.1|//PREDICTED: acyloxyacyl hydrolase isoform X3 [Gallus gallus];gi|513169676|ref|XP_004939588.1|//PREDICTED: acyloxyacyl hydrolase isoform X2 [Gallus gallus]
428699	7313	1084	420	-1.35607	3.51474e-66	Down	8.62265e-67	FRMPD3	GO:0005856//cytoskeleton	NA	NA	K05725//focal adhesion kinase 1 [EC:2.7.10.2]	gi|971391577|ref|XP_015133842.1|//PREDICTED: FERM and PDZ domain-containing protein 3 [Gallus gallus]
418046	3343	365	39	-3.21452	9.1444e-66	Down	2.25359e-66	TMPRSS6	GO:0005615//extracellular space;GO:0016021//integral component of membrane;GO:0005886//plasma membrane	GO:0004252//serine-type endopeptidase activity	GO:0000122//negative regulation of transcription from RNA polymerase II promoter;GO:0006879//cellular iron ion homeostasis;GO:0030514//negative regulation of BMP signaling pathway;GO:0042730//fibrinolysis;GO:0045944//positive regulation of transcription from RNA polymerase II promoter;GO:0033619//membrane protein proteolysis;GO:0097264//self proteolysis	K09637//transmembrane protease serine 6 [EC:3.4.21.-]	gi|971372513|ref|XP_004937822.2|//PREDICTED: transmembrane protease serine 6 [Gallus gallus]
421740	1403	331	27	-3.60397	1.65883e-65	Down	4.10044e-66	LOC421740	NA	NA	NA	K16949//amine sulfotransferase [EC:2.8.2.3]	gi|487440099|ref|NP_001264933.1|//sulfotransferase family 3A, member 1-like [Gallus gallus]
420869	9060	154	611	2.00007	1.82606e-65	Up	4.5172e-66	DSP	NA	NA	NA	K10381//desmoplakin	gi|513170606|ref|XP_004939722.1|//PREDICTED: desmoplakin isoform X2 [Gallus gallus];gi|363730419|ref|XP_001231411.2|//PREDICTED: desmoplakin isoform X4 [Gallus gallus];gi|363730417|ref|XP_418957.3|//PREDICTED: desmoplakin isoform X1 [Gallus gallus];gi|513170609|ref|XP_004939723.1|//PREDICTED: desmoplakin isoform X3 [Gallus gallus]
426826	3425	394.97	52.11	-2.91028	7.70313e-65	Down	1.91415e-65	DMBT1L	GO:0016020//membrane	GO:0005044//scavenger receptor activity	GO:0006898//receptor-mediated endocytosis	K13912//deleted in malignant brain tumors 1 protein	gi|971441004|ref|XP_015156077.1|//PREDICTED: deleted in malignant brain tumors 1 protein-like isoform X1 [Gallus gallus];gi|971441006|ref|XP_015156078.1|//PREDICTED: deleted in malignant brain tumors 1 protein-like isoform X2 [Gallus gallus]
420300	723	42	365	3.13127	8.81351e-65	Up	2.19171e-65	LOC420300	NA	NA	NA	K06846//lymphocyte antigen 6 complex locus protein D/E/G6/H	gi|971385304|ref|XP_418412.4|//PREDICTED: lymphocyte antigen 6E-like [Gallus gallus]
693251	1774	1228	519	-1.23067	1.57076e-64	Down	3.92947e-65	RP11-195F19.29	GO:0016021//integral component of membrane	GO:0004896//cytokine receptor activity	GO:0060322//head development;GO:0019221//cytokine-mediated signaling pathway	K05056//interleukin 11 receptor alpha	gi|971437652|ref|XP_015132845.1|//PREDICTED: interleukin-11 receptor subunit alpha isoform X1 [Gallus gallus];gi|971437658|ref|XP_015132848.1|//PREDICTED: interleukin-11 receptor subunit alpha isoform X4 [Gallus gallus];gi|971437654|ref|XP_015132846.1|//PREDICTED: interleukin-11 receptor subunit alpha isoform X2 [Gallus gallus];gi|971437656|ref|XP_015132847.1|//PREDICTED: interleukin-11 receptor …
421543	3016	380	47	-3.00344	2.41646e-64	Down	6.0676e-65	AGT	GO:0070062//extracellular exosome;GO:0072562//blood microparticle	GO:0031702//type 1 angiotensin receptor binding;GO:0031703//type 2 angiotensin receptor binding;GO:0017080//sodium channel regulator activity	GO:0042310//vasoconstriction;GO:0010595//positive regulation of endothelial cell migration;GO:0003014//renal system process;GO:0045893//positive regulation of transcription, DNA-templated;GO:0045742//positive regulation of epidermal growth factor receptor signaling pathway;GO:2001238//positive regulation of extrinsic apoptotic signaling pathway;GO:0051387//negative regulation of neurotrophin TRK …	K09821//angiotensinogen	gi|513175888|ref|XP_004935550.1|//PREDICTED: angiotensinogen [Gallus gallus]
421936	1966	657	178	-1.87219	5.50827e-64	Down	1.39027e-64	RRM2	NA	NA	NA	K10808//ribonucleoside-diphosphate reductase subunit M2 [EC:1.17.4.1]	gi|363732458|ref|XP_001231545.2|//PREDICTED: ribonucleoside-diphosphate reductase subunit M2 [Gallus gallus]
497213	3003	75.12	439.03	2.55888	1.7273e-63	Up	4.38533e-64	PCDHA3	GO:0016021//integral component of membrane;GO:0005886//plasma membrane	GO:0005509//calcium ion binding	GO:0007156//homophilic cell adhesion via plasma membrane adhesion molecules	K16493//protocadherin alpha	gi|162138878|ref|NP_001104603.1|//protocadherin alpha 3 precursor [Gallus gallus]
107057195	1335	0	350.7	9.46592	2.35537e-63	Up	5.99305e-64	LOC107057195	NA	NA	NA	NA	gi|971426146|ref|XP_015151382.1|//PREDICTED: outer dense fiber protein 3-like [Gallus gallus]
408024	1544	293	17	-4.09546	3.27817e-63	Down	8.36542e-64	PAH	GO:0070062//extracellular exosome	GO:0004505//phenylalanine 4-monooxygenase activity;GO:0016597//amino acid binding;GO:0005506//iron ion binding	GO:0009072//aromatic amino acid family metabolic process;GO:0055114//oxidation-reduction process;GO:0006559//L-phenylalanine catabolic process	K00500//phenylalanine-4-hydroxylase [EC:1.14.16.1]	gi|47604920|ref|NP_001001298.1|//phenylalanine-4-hydroxylase [Gallus gallus]
769473	3807	186	659	1.83681	4.44795e-63	Up	1.13754e-63	TTC18	NA	NA	NA	NA	gi|513209317|ref|XP_001232754.3|//PREDICTED: cilia- and flagella-associated protein 70 isoform X2 [Gallus gallus];gi|971420160|ref|XP_015150180.1|//PREDICTED: cilia- and flagella-associated protein 70 isoform X1 [Gallus gallus];gi|971420169|ref|XP_015150183.1|//PREDICTED: cilia- and flagella-associated protein 70 isoform X5 [Gallus gallus];gi|971420171|ref|XP_015150184.1|//PREDICTED: cilia- and f…
420854	1901	647	1389	1.11404	7.76632e-63	Up	1.99486e-63	EDN1	NA	NA	NA	K16366//endothelin-1	gi|118086398|ref|XP_418943.2|//PREDICTED: endothelin-1 [Gallus gallus]
425346	2064	1091	439	-1.30153	1.28531e-62	Down	3.31101e-63	CRTAC1	GO:0070062//extracellular exosome;GO:0030426//growth cone	GO:0005509//calcium ion binding	GO:0007413//axonal fasciculation;GO:1900121//negative regulation of receptor binding;GO:0021772//olfactory bulb development	K17307//fibulin 1/2	gi|971402828|ref|XP_015144177.1|//PREDICTED: cartilage acidic protein 1 isoform X1 [Gallus gallus];gi|122692287|ref|NP_001073680.1|//cartilage acidic protein 1 [Gallus gallus]
107057348	897	250.16	768.88	1.63174	2.23849e-62	Up	5.77893e-63	LOC107057348	NA	NA	NA	K14815//mRNA turnover protein 4	gi|483968268|ref|NP_001264845.1|//mRNA turnover protein 4 homolog [Gallus gallus]
427253	2297	494	1156	1.23839	6.41313e-62	Up	1.66645e-62	GDA	NA	NA	NA	K01487//guanine deaminase [EC:3.5.4.3]	gi|363744546|ref|XP_424835.3|//PREDICTED: guanine deaminase [Gallus gallus]
423196	813	723	220	-1.70466	6.41313e-62	Down	1.66755e-62	MDK	GO:0009986//cell surface;GO:0005604//basement membrane	GO:0008083//growth factor activity;GO:0008201//heparin binding	GO:0009611//response to wounding;GO:0030154//cell differentiation;GO:0050795//regulation of behavior;GO:0043524//negative regulation of neuron apoptotic process;GO:0021542//dentate gyrus development;GO:0051781//positive regulation of cell division;GO:0001662//behavioral fear response;GO:0045893//positive regulation of transcription, DNA-templated;GO:0021987//cerebral cortex development;GO:0021681…	K06828//midkine	gi|164518962|ref|NP_001106760.1|//midkine precursor [Gallus gallus];gi|33312179|gb|AAQ04021.1|AF419846_1//midkine precursor [Gallus gallus]
425113	1275	1613.45	793.94	-1.01122	7.74353e-62	Down	2.01637e-62	CHIR-IG1-5	NA	NA	NA	K14377//osteoclast-associated immunoglobulin-like receptor;K06264//platelet glycoprotein VI;K06512//leukocyte immunoglobulin-like receptor	gi|71896993|ref|NP_001026502.1|//immunoglobulin-like receptor CHIR-AB1-like precursor [Gallus gallus]
769122	7675	96	472	2.30951	1.0751e-60	Up	2.84749e-61	B3GALT2	GO:0016021//integral component of membrane;GO:0000139//Golgi membrane	GO:0008499//UDP-galactose:beta-N-acetylglucosamine beta-1,3-galactosyltransferase activity	GO:0006486//protein glycosylation;GO:0009312//oligosaccharide biosynthetic process	K07820//beta-1,3-galactosyltransferase 2 [EC:2.4.1.-]	gi|118094010|ref|XP_001231894.1|//PREDICTED: beta-1,3-galactosyltransferase 2 [Gallus gallus]
101748689	2378	55.03	379.79	2.79874	1.53964e-60	Up	4.0893e-61	LOC101748689	NA	NA	NA	K20915//tumor suppressor p53-binding protein 1;K09451//homeobox protein aristaless-like 4;K05750//NCK-associated protein 1;K06053//recombining binding protein suppressor of hairless	gi|971391504|ref|XP_015133817.1|//PREDICTED: uncharacterized protein LOC101748689 isoform X2 [Gallus gallus];gi|971391502|ref|XP_015133816.1|//PREDICTED: uncharacterized protein LOC101748689 isoform X1 [Gallus gallus]
431683	2227	958	364	-1.38426	1.70363e-60	Down	4.5312e-61	CYP27A1	NA	NA	NA	K00488//cholestanetriol 26-monooxygenase [EC:1.14.15.15]	gi|363736280|ref|XP_422056.3|//PREDICTED: sterol 26-hydroxylase, mitochondrial [Gallus gallus]
101747811	1002	1163	497	-1.2147	5.48614e-60	Down	1.46733e-60	APLN	NA	NA	NA	K05225//apelin	gi|971391666|ref|XP_015133872.1|//PREDICTED: apelin [Gallus gallus]
416191	3598	1401.13	657.13	-1.08051	6.56656e-60	Down	1.75997e-60	PCDH12	NA	NA	NA	K16499//protocadherin delta 2	gi|513206099|ref|XP_414518.4|//PREDICTED: protocadherin-12 [Gallus gallus]
429200	2456	348	43	-3.00485	4.36393e-59	Down	1.17936e-59	SLC38A3	GO:0005887//integral component of plasma membrane	GO:0005290//L-histidine transmembrane transporter activity;GO:0015186//L-glutamine transmembrane transporter activity;GO:0015182//L-asparagine transmembrane transporter activity;GO:0015180//L-alanine transmembrane transporter activity	GO:0015817//histidine transport;GO:0006868//glutamine transport;GO:0015808//L-alanine transport;GO:0051365//cellular response to potassium ion starvation;GO:0006867//asparagine transport;GO:0061402//positive regulation of transcription from RNA polymerase II promoter in response to acidic pH;GO:0089709//L-histidine transmembrane transport	K13576//solute carrier family 38 (sodium-coupled neutral amino acid transporter), member 3	gi|363738576|ref|XP_426756.3|//PREDICTED: sodium-coupled neutral amino acid transporter 3 [Gallus gallus]
416266	14465	265	13	-4.33758	4.46644e-59	Down	1.20872e-59	FAT2	NA	NA	NA	K16506//protocadherin Fat 1/2/3	gi|513206962|ref|XP_414584.4|//PREDICTED: protocadherin Fat 2 [Gallus gallus]
395480	1152	1069	440	-1.26886	4.5242e-59	Down	1.2252e-59	RGN	GO:0005654//nucleoplasm;GO:0005737//cytoplasm	GO:0004341//gluconolactonase activity;GO:0005509//calcium ion binding;GO:0008270//zinc ion binding;GO:0030234//enzyme regulator activity	GO:0032781//positive regulation of ATPase activity;GO:0019853//L-ascorbic acid biosynthetic process;GO:0050848//regulation of calcium-mediated signaling;GO:0006874//cellular calcium ion homeostasis	K01053//gluconolactonase [EC:3.1.1.17]	gi|971376431|ref|XP_015133172.1|//PREDICTED: regucalcin isoform X1 [Gallus gallus];gi|971376433|ref|XP_015133173.1|//PREDICTED: regucalcin isoform X2 [Gallus gallus];gi|45382019|ref|NP_990060.1|//regucalcin [Gallus gallus]
423432	1847	262	12	-4.43663	4.80312e-59	Down	1.30162e-59	SERPINA10	NA	NA	NA	K04525//serpin peptidase inhibitor, clade A	gi|971400175|ref|XP_015143253.1|//PREDICTED: protein Z-dependent protease inhibitor [Gallus gallus]
419841	2112	722	230	-1.63853	1.52728e-58	Down	4.15021e-59	FAM72A	NA	NA	NA	NA	gi|513224756|ref|XP_417970.3|//PREDICTED: protein FAM72A [Gallus gallus]
422643	3031	277.48	18.18	-3.92013	2.08654e-58	Down	5.67771e-59	LOC422643	NA	NA	NA	NA	gi|513183282|ref|XP_004941230.1|//PREDICTED: uncharacterized protein LOC422643 [Gallus gallus]
430534	3408	527.28	126.96	-2.04237	9.03557e-58	Down	2.47885e-58	FOXM1	GO:0005654//nucleoplasm;GO:0005737//cytoplasm	GO:0000981//RNA polymerase II transcription factor activity, sequence-specific DNA binding;GO:0043565//sequence-specific DNA binding;GO:0019901//protein kinase binding	GO:0071156//regulation of cell cycle arrest;GO:0032873//negative regulation of stress-activated MAPK cascade;GO:0000122//negative regulation of transcription from RNA polymerase II promoter;GO:0090344//negative regulation of cell aging;GO:0046578//regulation of Ras protein signal transduction;GO:0045944//positive regulation of transcription from RNA polymerase II promoter;GO:2000781//positive reg…	K09406//forkhead box protein M	gi|971373586|ref|XP_015148114.1|//PREDICTED: forkhead box protein M1 isoform X1 [Gallus gallus];gi|971373596|ref|XP_015148147.1|//PREDICTED: forkhead box protein M1 isoform X3 [Gallus gallus];gi|971373598|ref|XP_015148151.1|//PREDICTED: forkhead box protein M1 isoform X4 [Gallus gallus];gi|971373594|ref|XP_015148145.1|//PREDICTED: forkhead box protein M1 isoform X2 [Gallus gallus];gi|61098452|ref…
378922	3736	555	142	-1.95477	1.98426e-57	Down	5.45476e-58	BUB1B	NA	NA	NA	K06637//mitotic checkpoint serine/threonine-protein kinase BUB1 beta [EC:2.7.11.1]	gi|741866077|ref|NP_989734.2|//mitotic checkpoint serine/threonine-protein kinase BUB1 beta [Gallus gallus]
428693	2410	593	162	-1.86021	2.0261e-57	Down	5.57356e-58	LOC428693	NA	NA	NA	K11160//diacylglycerol O-acyltransferase 2 [EC:2.3.1.20 2.3.1.75]	gi|971391535|ref|XP_015133828.1|//PREDICTED: diacylglycerol O-acyltransferase 2 isoform X7 [Gallus gallus];gi|971391533|ref|XP_015133827.1|//PREDICTED: diacylglycerol O-acyltransferase 2 isoform X6 [Gallus gallus];gi|971391531|ref|XP_015133826.1|//PREDICTED: diacylglycerol O-acyltransferase 2 isoform X5 [Gallus gallus];gi|971391524|ref|XP_015133823.1|//PREDICTED: diacylglycerol O-acyltransferase …
100857858	1530	1398.69	669.78	-1.05049	3.44876e-57	Down	9.49994e-58	LOC100857858	GO:0005874//microtubule;GO:0005737//cytoplasm	GO:0005200//structural constituent of cytoskeleton;GO:0005525//GTP binding;GO:0003924//GTPase activity	GO:0007017//microtubule-based process	K07374//tubulin alpha	gi|971437044|ref|XP_015155800.1|//PREDICTED: tubulin alpha-1C chain [Gallus gallus]
415598	6732	865.99	320.89	-1.42044	5.91227e-57	Down	1.63299e-57	CHSY3	NA	NA	NA	K13499//chondroitin sulfate synthase [EC:2.4.1.175 2.4.1.226]	gi|363744614|ref|XP_413966.3|//PREDICTED: chondroitin sulfate synthase 3 [Gallus gallus]
422716	7364	595	165	-1.83859	1.00683e-56	Down	2.78463e-57	CENPE	NA	NA	NA	K11498//centromeric protein E	gi|971395150|ref|XP_015141088.1|//PREDICTED: centromere-associated protein E isoform X3 [Gallus gallus];gi|971395147|ref|XP_015141087.1|//PREDICTED: centromere-associated protein E isoform X1 [Gallus gallus];gi|513183860|ref|XP_420670.4|//PREDICTED: centromere-associated protein E isoform X2 [Gallus gallus]
396096	1712	395	67	-2.54779	1.47523e-56	Down	4.09112e-57	HOXA9	NA	NA	NA	K09294//homeobox protein HoxA/B/C/D9	gi|764020105|ref|NP_001292153.1|//homeobox protein Hox-A9 [Gallus gallus]
428328	4869	672	1376	1.04578	2.48152e-56	Up	6.89559e-57	ATP8B3	NA	NA	NA	K01530//phospholipid-translocating ATPase [EC:3.6.3.1]	gi|971436039|ref|XP_015155362.1|//PREDICTED: phospholipid-transporting ATPase IK isoform X1 [Gallus gallus];gi|971436041|ref|XP_015155363.1|//PREDICTED: phospholipid-transporting ATPase IK isoform X2 [Gallus gallus]
431569	5687	54	358	2.74076	5.91585e-56	Up	1.65049e-56	RHOBTB3	NA	NA	NA	K07869//Rho-related BTB domain-containing protein 3	gi|513231850|ref|XP_004949440.1|//PREDICTED: rho-related BTB domain-containing protein 3 isoform X1 [Gallus gallus];gi|513231856|ref|XP_429123.4|//PREDICTED: rho-related BTB domain-containing protein 3 isoform X3 [Gallus gallus];gi|513231853|ref|XP_004949441.1|//PREDICTED: rho-related BTB domain-containing protein 3 isoform X2 [Gallus gallus]
771074	3471	963	386	-1.3071	8.21735e-56	Down	2.30176e-56	TTPA	NA	NA	NA	K19625//retinaldehyde-binding protein 1	gi|513172282|ref|XP_001234376.2|//PREDICTED: alpha-tocopherol transfer protein [Gallus gallus]
107055958	1512	0	298.32	9.23255	8.86146e-56	Up	2.48383e-56	LOC107055958	NA	NA	NA	NA	gi|971442022|ref|XP_015156520.1|//PREDICTED: uncharacterized protein LOC107055958 [Gallus gallus]
427263	3147	508	123	-2.03434	1.94286e-55	Down	5.46382e-56	PSAT1	NA	NA	NA	K00831//phosphoserine aminotransferase [EC:2.6.1.52]	gi|363744581|ref|XP_424846.3|//PREDICTED: phosphoserine aminotransferase [Gallus gallus]
100857544	4705	382.92	64.42	-2.55963	3.74156e-55	Down	1.05988e-55	LOC100857544	NA	NA	NA	K16494//protocadherin beta	gi|971447674|ref|XP_015128788.1|//PREDICTED: protocadherin beta-15-like [Gallus gallus]
428773	2029	444.31	94.08	-2.22778	2.07975e-54	Down	5.95711e-55	CFI	NA	NA	NA	K01333//complement factor I [EC:3.4.21.45]	gi|433282973|ref|NP_001258947.1|//complement factor I precursor [Gallus gallus]
101749627	2983	1020	431	-1.23098	6.88686e-54	Down	1.98416e-54	P2RY14	NA	NA	NA	K04299//purinergic receptor P2Y, G protein-coupled, 14	gi|959092266|ref|NP_001304330.1|//P2Y purinoceptor 14 [Gallus gallus]
426075	4065	906.33	358.71	-1.32539	9.9641e-54	Down	2.88185e-54	LMOD3	NA	NA	NA	K10370//tropomodulin	gi|971416424|ref|XP_015148734.1|//PREDICTED: leiomodin-3 [Gallus gallus]
422415	3747	1336	645	-1.03872	1.00111e-53	Down	2.89729e-54	RXFP1	GO:0016021//integral component of membrane	GO:0042562//hormone binding;GO:0004930//G-protein coupled receptor activity	GO:0007567//parturition;GO:0030154//cell differentiation;GO:0030198//extracellular matrix organization;GO:0060427//lung connective tissue development;GO:0007188//adenylate cyclase-modulating G-protein coupled receptor signaling pathway	K04306//relaxin family peptide receptor 1	gi|118089778|ref|XP_420385.2|//PREDICTED: relaxin receptor 1 isoform X1 [Gallus gallus];gi|971392688|ref|XP_015140821.1|//PREDICTED: relaxin receptor 1 isoform X2 [Gallus gallus]
395939	1409	77	399	2.38529	1.67869e-53	Up	4.87079e-54	DIO3	NA	NA	NA	K07754//thyroxine 5-deiodinase [EC:1.21.99.3]	gi|169790979|ref|NP_001116120.1|//thyroxine 5-deiodinase [Gallus gallus]
107049142	1307	580.22	167.27	-1.78259	4.04019e-53	Down	1.17904e-53	LOC107049142	NA	NA	NA	K07413//cytochrome P450 family 2 subfamily C [EC:1.14.14.1];K17853//cytochrome P450 family 2 subfamily H	gi|971450070|ref|XP_015129738.1|//PREDICTED: cytochrome P450 2C55-like [Gallus gallus]
419828	2923	600	179	-1.73317	7.83056e-53	Down	2.291e-53	NUAK2	NA	NA	NA	K08800//NUAK family, SNF1-like kinase [EC:2.7.11.1]	gi|513224632|ref|XP_417962.3|//PREDICTED: NUAK family SNF1-like kinase 2 [Gallus gallus]
107050336	3401	4	217.4	5.77604	8.42132e-53	Up	2.4654e-53	LOC107050336	NA	NA	NA	NA	gi|971377028|ref|XP_015129593.1|//PREDICTED: uncharacterized protein LOC107050336 [Gallus gallus]
420271	3113	1252	592	-1.06874	8.90654e-53	Down	2.61077e-53	RSPO2	GO:0009986//cell surface;GO:0005576//extracellular region	GO:0008201//heparin binding;GO:0005102//receptor binding	GO:0001649//osteoblast differentiation;GO:0030282//bone mineralization;GO:0060441//epithelial tube branching involved in lung morphogenesis;GO:0060535//trachea cartilage morphogenesis;GO:0035116//embryonic hindlimb morphogenesis;GO:0071542//dopaminergic neuron differentiation;GO:0035115//embryonic forelimb morphogenesis;GO:0090263//positive regulation of canonical Wnt signaling pathway;GO:0060437…	K19471//R-spondin-1	gi|974987339|ref|NP_001305953.1|//R-spondin-2 precursor [Gallus gallus]
396167	1435	538	146	-1.86981	1.35009e-52	Down	3.98011e-53	CCNB3	GO:0005654//nucleoplasm	GO:0019901//protein kinase binding	GO:0010389//regulation of G2/M transition of mitotic cell cycle;GO:0051301//cell division;GO:0000079//regulation of cyclin-dependent protein serine/threonine kinase activity	K05868//cyclin B	gi|491229158|ref|NP_990570.2|//G2/mitotic-specific cyclin-B3 [Gallus gallus] ;gi|971391254|ref|XP_015133686.1|//PREDICTED: G2/mitotic-specific cyclin-B3 isoform X2 [Gallus gallus]
423049	7084	293	783	1.42994	1.42708e-52	Up	4.21239e-53	SCUBE2	NA	NA	NA	K06825//fibrillin 1;K17307//fibulin 1/2	gi|363734260|ref|XP_420982.3|//PREDICTED: signal peptide, CUB and EGF-like domain-containing protein 2 isoform X2 [Gallus gallus];gi|971397159|ref|XP_015141962.1|//PREDICTED: signal peptide, CUB and EGF-like domain-containing protein 2 isoform X4 [Gallus gallus];gi|971397153|ref|XP_015141960.1|//PREDICTED: signal peptide, CUB and EGF-like domain-containing protein 2 isoform X1 [Gallus gallus];gi|…
396063	819	305	802	1.40662	1.57227e-52	Up	4.64389e-53	SM1	GO:0032982//myosin filament;GO:0030016//myofibril	GO:0003779//actin binding;GO:0005524//ATP binding;GO:0003774//motor activity	NA	K17751//myosin heavy chain 6/7	gi|971452047|ref|XP_015130558.1|//PREDICTED: myosin-7 [Gallus gallus]
417962	2777	317	821	1.38473	1.64069e-52	Up	4.85207e-53	LOC417962	NA	NA	NA	K10993//fanconi anemia core complex 100 kDa subunit	gi|971372807|ref|XP_015144850.1|//PREDICTED: uncharacterized protein LOC417962 [Gallus gallus]
374011	1409	638.5	201.72	-1.6505	1.75141e-52	Down	5.18601e-53	MAB21L2	GO:0005634//nucleus	GO:0005515//protein binding	GO:0007399//nervous system development;GO:0010172//embryonic body morphogenesis;GO:0043010//camera-type eye development;GO:0008284//positive regulation of cell proliferation	K17834//cyclic GMP-AMP synthase [EC:2.7.7.86]	gi|31560522|ref|NP_035969.2|//protein mab-21-like 2 [Mus musculus]
417624	3535	1084	481	-1.16043	3.30812e-52	Down	9.83245e-53	DOC2B	NA	NA	NA	K19917//double C2-like domain-containing protein beta	gi|513216400|ref|XP_004946765.1|//PREDICTED: double C2-like domain-containing protein beta isoform X1 [Gallus gallus];gi|118100378|ref|XP_415868.2|//PREDICTED: double C2-like domain-containing protein beta isoform X2 [Gallus gallus]
107053698	1871	257	719	1.49605	1.12891e-51	Up	3.38266e-52	NKX2-3	NA	NA	NA	K09343//homeobox protein Nkx-2.3	gi|971403146|ref|XP_015144306.1|//PREDICTED: homeobox protein Nkx-2.3 [Gallus gallus]
415914	4882	667	1332	1.00967	1.30708e-51	Up	3.91895e-52	C12H3ORF18	GO:0016021//integral component of membrane	NA	NA	NA	gi|971415393|ref|XP_015148265.1|//PREDICTED: uncharacterized protein C3orf18 homolog isoform X2 [Gallus gallus];gi|971415387|ref|XP_015148261.1|//PREDICTED: uncharacterized protein C3orf18 homolog isoform X1 [Gallus gallus];gi|971415395|ref|XP_015148266.1|//PREDICTED: uncharacterized protein C3orf18 homolog isoform X3 [Gallus gallus]
107057018	5475	361.28	62.12	-2.52816	1.95547e-51	Down	5.89209e-52	LOC107057018	NA	NA	NA	K17635//ral guanine nucleotide dissociation stimulator-like 1	gi|971444166|ref|XP_015157446.1|//PREDICTED: uncharacterized protein LOC107056994 [Gallus gallus]
420776	3532	585	175	-1.72925	2.13417e-51	Down	6.43451e-52	BLVRA	GO:0070062//extracellular exosome;GO:0005737//cytoplasm	GO:0008270//zinc ion binding;GO:0004074//biliverdin reductase activity	GO:0042167//heme catabolic process;GO:0055114//oxidation-reduction process	K00214//biliverdin reductase [EC:1.3.1.24]	gi|513170012|ref|XP_418872.3|//PREDICTED: biliverdin reductase A [Gallus gallus]
423490	2222	543.02	1153.18	1.09837	2.74682e-51	Up	8.29187e-52	C14ORF180	NA	NA	NA	K17581//consortin	gi|513189442|ref|XP_004936448.1|//PREDICTED: nutritionally-regulated adipose and cardiac enriched protein homolog isoform X2 [Gallus gallus];gi|118092069|ref|XP_430057.2|//PREDICTED: nutritionally-regulated adipose and cardiac enriched protein homolog isoform X1 [Gallus gallus]
415545	6033	371.31	66.97	-2.45921	3.0959e-51	Down	9.36867e-52	MEGF11	GO:0016021//integral component of membrane	NA	NA	K02258//cytochrome c oxidase assembly protein subunit 11;K02599//Notch 1	gi|971413619|ref|XP_015147728.1|//PREDICTED: multiple epidermal growth factor-like domains protein 11 isoform X9 [Gallus gallus];gi|971413615|ref|XP_015147726.1|//PREDICTED: multiple epidermal growth factor-like domains protein 11 isoform X7 [Gallus gallus];gi|971413607|ref|XP_015147722.1|//PREDICTED: multiple epidermal growth factor-like domains protein 11 isoform X3 [Gallus gallus];gi|971413613…
101749531	3350	430.66	95.23	-2.16523	5.15443e-51	Down	1.56268e-51	LOC101749531	NA	NA	NA	K05767//Ras GTPase-activating-like protein IQGAP2/3	gi|971447416|ref|XP_015128672.1|//PREDICTED: ras GTPase-activating-like protein IQGAP3, partial [Gallus gallus]
421153	3172	598	184	-1.68861	7.93019e-51	Down	2.40864e-51	DENND2D	NA	NA	NA	K20161//DENN domain-containing protein 2	gi|971433427|ref|XP_419235.5|//PREDICTED: DENN domain-containing protein 2D [Gallus gallus]
421169	1585	1168	546	-1.08524	1.50105e-50	Down	4.5731e-51	TUBA3E	NA	NA	NA	K07374//tubulin alpha	gi|760998679|ref|NP_001292069.1|//tubulin alpha-8 chain [Gallus gallus]
417535	779	706.37	247.95	-1.49854	1.63629e-50	Down	4.98819e-51	CCLI7	GO:0005615//extracellular space	GO:0008009//chemokine activity;GO:0048020//CCR chemokine receptor binding	GO:0007186//G-protein coupled receptor signaling pathway;GO:0048247//lymphocyte chemotaxis;GO:0030593//neutrophil chemotaxis;GO:0070098//chemokine-mediated signaling pathway;GO:0043547//positive regulation of GTPase activity;GO:0050729//positive regulation of inflammatory response;GO:0071356//cellular response to tumor necrosis factor;GO:0071346//cellular response to interferon-gamma;GO:0071347//…	K05408//C-C motif chemokine 3	gi|348591869|emb|CCC15113.1|//chemokine [Gallus gallus]
100859223	2980	450	106	-2.07403	1.70047e-50	Down	5.18699e-51	MUC13	NA	NA	NA	K17298//mucin-13	gi|971406246|ref|XP_015145456.1|//PREDICTED: mucin-13 isoform X2 [Gallus gallus];gi|971406248|ref|XP_015145457.1|//PREDICTED: mucin-13 isoform X3 [Gallus gallus];gi|513195068|ref|XP_003641633.2|//PREDICTED: mucin-13 isoform X1 [Gallus gallus];gi|971406250|ref|XP_015145458.1|//PREDICTED: mucin-13 isoform X4 [Gallus gallus];gi|971406252|ref|XP_015145459.1|//PREDICTED: mucin-13 isoform X5 [Gallus ga…
414838	1820	505	135	-1.89149	3.22528e-50	Down	9.85618e-51	CYP11A1	GO:0005743//mitochondrial inner membrane	GO:0016709//oxidoreductase activity, acting on paired donors, with incorporation or reduction of molecular oxygen, NAD(P)H as one donor, and incorporation of one atom of oxygen;GO:0020037//heme binding;GO:0005506//iron ion binding;GO:0008386//cholesterol monooxygenase (side-chain-cleaving) activity	GO:0006704//glucocorticoid biosynthetic process;GO:0006700//C21-steroid hormone biosynthetic process;GO:0008203//cholesterol metabolic process;GO:0044550//secondary metabolite biosynthetic process;GO:0055114//oxidation-reduction process;GO:0034650//cortisol metabolic process;GO:0071375//cellular response to peptide hormone stimulus	K00498//cholesterol monooxygenase (side-chain-cleaving) [EC:1.14.15.6]	gi|48976109|ref|NP_001001756.1|//cholesterol side-chain cleavage enzyme, mitochondrial [Gallus gallus]
772372	1597	751	276	-1.43231	3.28203e-50	Down	1.00357e-50	BDKRB1	GO:0016021//integral component of membrane	GO:0004947//bradykinin receptor activity;GO:0042277//peptide binding	GO:0007186//G-protein coupled receptor signaling pathway;GO:0009612//response to mechanical stimulus;GO:0032496//response to lipopolysaccharide;GO:0006954//inflammatory response	K03915//bradykinin receptor B1	gi|123959736|ref|NP_001074189.1|//B1 bradykinin receptor [Gallus gallus]
431305	1948	54	333	2.63632	4.17809e-50	Up	1.27989e-50	AQP5	GO:0070062//extracellular exosome;GO:0005783//endoplasmic reticulum;GO:0005887//integral component of plasma membrane;GO:0016324//apical plasma membrane;GO:0005902//microvillus;GO:0009925//basal plasma membrane	GO:0015250//water channel activity;GO:0015254//glycerol channel activity	GO:0006833//water transport;GO:0046541//saliva secretion;GO:0034220//ion transmembrane transport;GO:0009992//cellular water homeostasis;GO:0015670//carbon dioxide transport;GO:0048593//camera-type eye morphogenesis;GO:0030157//pancreatic juice secretion;GO:0015793//glycerol transport	K09867//aquaporin-5	gi|326919520|ref|XP_003206028.1|//PREDICTED: aquaporin-5-like [Meleagris gallopavo]
423007	6952	487	126	-1.93867	4.70097e-50	Down	1.44095e-50	CASC5	NA	NA	NA	K11542//protein CASC5	gi|513185891|ref|XP_420938.4|//PREDICTED: protein CASC5 isoform X1 [Gallus gallus];gi|513185894|ref|XP_004941355.1|//PREDICTED: protein CASC5 isoform X2 [Gallus gallus];gi|971396722|ref|XP_015141757.1|//PREDICTED: protein CASC5 isoform X3 [Gallus gallus]
419345	7455	1053	471	-1.14888	5.58958e-50	Down	1.71852e-50	ATP9A	NA	NA	NA	K01530//phospholipid-translocating ATPase [EC:3.6.3.1]	gi|971427768|ref|XP_015152005.1|//PREDICTED: probable phospholipid-transporting ATPase IIA isoform X2 [Gallus gallus];gi|971427766|ref|XP_015152004.1|//PREDICTED: probable phospholipid-transporting ATPase IIA isoform X1 [Gallus gallus]
770737	1184	513	140	-1.8617	6.08574e-50	Down	1.8722e-50	GAMT	NA	NA	NA	K00542//guanidinoacetate N-methyltransferase [EC:2.1.1.2]	gi|971436244|ref|XP_015155460.1|//PREDICTED: guanidinoacetate N-methyltransferase [Gallus gallus]
395704	1088	805	312	-1.35561	1.56401e-49	Down	4.83767e-50	FGF12	GO:0005634//nucleus	GO:0008083//growth factor activity;GO:0008201//heparin binding	GO:0007268//chemical synaptic transmission;GO:0008344//adult locomotory behavior;GO:0008543//fibroblast growth factor receptor signaling pathway;GO:0050905//neuromuscular process;GO:0010765//positive regulation of sodium ion transport;GO:0007254//JNK cascade	K04358//fibroblast growth factor	gi|45382435|ref|NP_990219.1|//fibroblast growth factor 12 [Gallus gallus];gi|874500668|ref|XP_012964029.1|//PREDICTED: fibroblast growth factor 12 isoform X2 [Anas platyrhynchos];gi|6911116|gb|AAF31390.1|AF199602_1//fibroblast growth factor homologous factor 1 isoform 1B [Gallus gallus]
396272	2635	225.13	12.3	-4.1822	1.67556e-49	Down	5.18582e-50	SLC2A2	GO:0005903//brush border;GO:0016324//apical plasma membrane;GO:0005911//cell-cell junction;GO:0016021//integral component of membrane;GO:0005737//cytoplasm	GO:0055056//D-glucose transmembrane transporter activity;GO:0033300//dehydroascorbic acid transporter activity	GO:0070837//dehydroascorbic acid transport;GO:1904659//glucose transmembrane transport	K07593//MFS transporter, SP family, solute carrier family 2 (facilitated glucose transporter), member 2	gi|46395468|ref|NP_997061.1|//solute carrier family 2, facilitated glucose transporter member 2 [Gallus gallus]
428247	6588	265	719	1.45183	1.743e-49	Up	5.39777e-50	HTR3A	NA	NA	NA	K04819//5-hydroxytryptamine receptor 3	gi|513222304|ref|XP_004948120.1|//PREDICTED: 5-hydroxytryptamine receptor 3A [Gallus gallus]
100858678	3219	210.57	627.78	1.58779	2.63809e-49	Up	8.18445e-50	LOC100858678	NA	GO:0003989//acetyl-CoA carboxylase activity;GO:0004075//biotin carboxylase activity	NA	K01946//acetyl-CoA carboxylase / biotin carboxylase 2 [EC:6.4.1.2 6.3.4.14]	gi|971444343|ref|XP_015157522.1|//PREDICTED: LOW QUALITY PROTEIN: acetyl-CoA carboxylase 2-like [Gallus gallus]
776376	1159	820.4	325.06	-1.32379	1.06947e-48	Down	3.33585e-49	LOC776376	NA	NA	NA	K16143//null	gi|922959946|ref|NP_001300649.1|//C-reactive protein, pentraxin-related precursor [Gallus gallus]
396477	843	357	66	-2.42356	1.6068e-48	Down	5.01483e-49	FBXL12	GO:0016021//integral component of membrane	GO:0030246//carbohydrate binding	GO:0006897//endocytosis	K06563//CD209 antigen;K17513//C-type lectin superfamily 17 member A	gi|45382743|ref|NP_990815.1|//hepatic lectin [Gallus gallus]
422876	3095	212	10	-4.39416	7.24159e-48	Down	2.283e-48	HGFAC	NA	NA	NA	K09631//hepatocyte growth factor activator [EC:3.4.21.-]	gi|513185002|ref|XP_420819.4|//PREDICTED: hepatocyte growth factor activator [Gallus gallus]
424320	2688	463.3	120.08	-1.93612	1.30158e-47	Down	4.11066e-48	NR4A2	NA	NA	NA	K08558//nuclear receptor subfamily 4 group A member 2	gi|971406817|ref|XP_015145688.1|//PREDICTED: nuclear receptor subfamily 4 group A member 2 isoform X2 [Gallus gallus];gi|971406815|ref|XP_015145687.1|//PREDICTED: nuclear receptor subfamily 4 group A member 2 isoform X1 [Gallus gallus];gi|971406819|ref|XP_015145689.1|//PREDICTED: nuclear receptor subfamily 4 group A member 2 isoform X3 [Gallus gallus]
772243	3648	555.89	1142.41	1.05104	2.06173e-47	Up	6.52288e-48	LOC772243	NA	NA	NA	K19364//magnesium transporter NIPA1	gi|971409233|ref|XP_015146699.1|//PREDICTED: MLV-related proviral Env polyprotein-like [Gallus gallus]
100859413	848	553	171	-1.68145	7.62271e-47	Down	2.43435e-47	UBE2C	NA	NA	NA	K06688//ubiquitin-conjugating enzyme E2 C [EC:2.3.2.23]	gi|971427930|ref|XP_015152064.1|//PREDICTED: ubiquitin-conjugating enzyme E2 C [Gallus gallus]
419558	1839	722	271	-1.40188	7.72323e-47	Down	2.46789e-47	SERINC2	NA	NA	NA	NA	gi|71894725|ref|NP_001026061.1|//serine incorporator 2 precursor [Gallus gallus]
770384	3660	1034.82	474.71	-1.11243	9.75993e-47	Down	3.12414e-47	HCN2	NA	NA	NA	K04955//hyperpolarization activated cyclic nucleotide-gated potassium channel 2	gi|363743778|ref|XP_003642915.1|//PREDICTED: potassium/sodium hyperpolarization-activated cyclic nucleotide-gated channel 2 [Gallus gallus]
415567	3504	686	250	-1.44445	1.45018e-46	Down	4.65549e-47	KIF23	NA	NA	NA	K17387//kinesin family member 23	gi|971413296|ref|XP_015147595.1|//PREDICTED: kinesin-like protein KIF23 isoform X6 [Gallus gallus];gi|971413298|ref|XP_015147596.1|//PREDICTED: kinesin-like protein KIF23 isoform X7 [Gallus gallus];gi|971413300|ref|XP_015147597.1|//PREDICTED: kinesin-like protein KIF23 isoform X8 [Gallus gallus];gi|971413288|ref|XP_015147591.1|//PREDICTED: kinesin-like protein KIF23 isoform X2 [Gallus gallus];gi|…
428702	1223	996	450	-1.13439	1.966e-46	Down	6.31873e-47	LOC428702	NA	NA	NA	K07612//gap junction protein, alpha 3	gi|971391728|ref|XP_015133894.1|//PREDICTED: gap junction alpha-3 protein-like [Gallus gallus]
107054819	897	269.22	704.4	1.39944	5.56107e-46	Up	1.79871e-46	LOC107054819	NA	NA	NA	NA	gi|971427234|ref|XP_015151781.1|//PREDICTED: protein MANBAL-like isoform X2 [Gallus gallus]
100857781	630	588	1173	1.00815	1.58832e-45	Up	5.17871e-46	LOC100857781	NA	NA	NA	K08050//protein phosphatase 1 regulatory subunit 1A	gi|971436961|ref|XP_003643167.2|//PREDICTED: protein phosphatase 1 regulatory subunit 1A [Gallus gallus]
418824	7717	405	96	-2.06499	2.35622e-45	Down	7.69562e-46	DIAPH3	NA	GO:0003779//actin binding;GO:0017048//Rho GTPase binding	GO:0030036//actin cytoskeleton organization	K05745//diaphanous 3	gi|971377686|ref|XP_015132339.1|//PREDICTED: protein diaphanous homolog 3 [Gallus gallus]
107053633	3741	598.04	202.01	-1.55399	2.80438e-45	Down	9.16976e-46	EGR2	NA	NA	NA	K12496//early growth response protein 2	gi|971401347|ref|XP_015143623.1|//PREDICTED: E3 SUMO-protein ligase EGR2 [Gallus gallus]
769832	3370	385	875	1.19625	8.0423e-45	Up	2.64314e-45	CCDC3	NA	NA	NA	NA	gi|363727433|ref|XP_003640381.1|//PREDICTED: coiled-coil domain-containing protein 3 [Gallus gallus]
431581	1335	99	400	2.02633	4.07118e-44	Up	1.34861e-44	HTR1A	GO:0005887//integral component of plasma membrane	GO:0004993//G-protein coupled serotonin receptor activity	GO:0007198//adenylate cyclase-inhibiting serotonin receptor signaling pathway;GO:0050795//regulation of behavior;GO:0046883//regulation of hormone secretion;GO:0042310//vasoconstriction;GO:0001662//behavioral fear response;GO:0042053//regulation of dopamine metabolic process;GO:0014062//regulation of serotonin secretion;GO:0042428//serotonin metabolic process;GO:0008283//cell proliferation;GO:003…	K04153//5-hydroxytryptamine receptor 1	gi|281427794|ref|NP_001163999.1|//5-hydroxytryptamine receptor 1A [Gallus gallus]
770592	192	117	434	1.90302	4.59915e-44	Up	1.52607e-44	MT3	NA	GO:0046872//metal ion binding	NA	K14739//metallothionein 1/2	gi|147901436|ref|NP_001091007.1|//metallothionein-3 [Gallus gallus]
396025	6343	928.1	416.15	-1.14535	5.05425e-44	Down	1.6799e-44	XDH	GO:0005615//extracellular space;GO:0005829//cytosol;GO:0005777//peroxisome;GO:0016529//sarcoplasmic reticulum	GO:0009055//electron carrier activity;GO:0016614//oxidoreductase activity, acting on CH-OH group of donors;GO:0051537//2 iron, 2 sulfur cluster binding;GO:0004855//xanthine oxidase activity;GO:0005506//iron ion binding;GO:0030151//molybdenum ion binding;GO:0050660//flavin adenine dinucleotide binding;GO:0004854//xanthine dehydrogenase activity;GO:0042803//protein homodimerization activity;GO:0016…	GO:0001937//negative regulation of endothelial cell proliferation;GO:2001213//negative regulation of vasculogenesis;GO:1900747//negative regulation of vascular endothelial growth factor signaling pathway;GO:2000379//positive regulation of reactive oxygen species metabolic process;GO:0010629//negative regulation of gene expression;GO:0055114//oxidation-reduction process;GO:1900745//positive regula…	K00106//xanthine dehydrogenase/oxidase [EC:1.17.1.4 1.17.3.2]	gi|46048759|ref|NP_990458.1|//xanthine dehydrogenase/oxidase [Gallus gallus];gi|971385609|ref|XP_015138835.1|//PREDICTED: xanthine dehydrogenase/oxidase isoform X1 [Gallus gallus]
395954	1836	127	452	1.84332	5.819e-44	Up	1.93517e-44	MATN3	GO:0005578//proteinaceous extracellular matrix	GO:0005509//calcium ion binding	NA	K19467//matrilin-3	gi|45384196|ref|NP_990403.1|//matrilin-3 precursor [Gallus gallus]
107053269	1448	329.33	62.92	-2.37611	6.86115e-44	Down	2.28302e-44	LOC107053269	NA	GO:0008270//zinc ion binding;GO:0016491//oxidoreductase activity	GO:0055114//oxidation-reduction process	K13951//alcohol dehydrogenase 1/7 [EC:1.1.1.1]	gi|971395237|ref|XP_015141124.1|//PREDICTED: alcohol dehydrogenase 1-like isoform X1 [Gallus gallus]
374010	960	64.79	328.4	2.35344	1.22534e-43	Up	4.08412e-44	UNG	GO:0005654//nucleoplasm;GO:0005739//mitochondrion	GO:0004844//uracil DNA N-glycosylase activity	GO:0045008//depyrimidination	K03648//uracil-DNA glycosylase [EC:3.2.2.27]	gi|45383742|ref|NP_989520.1|//uracil-DNA glycosylase [Gallus gallus]
107056717	2547	408.11	101.91	-1.98983	1.28936e-43	Down	4.30229e-44	LOC107056717	NA	NA	NA	K09828//Delta24-sterol reductase [EC:1.3.1.72 1.3.1.-]	gi|971443639|ref|XP_015157221.1|//PREDICTED: delta(24)-sterol reductase-like [Gallus gallus]
421631	3541	96.49	390.34	2.02811	3.90461e-43	Up	1.30869e-43	IYD	GO:0016021//integral component of membrane	GO:0004447//iodide peroxidase activity	GO:0098869//cellular oxidant detoxification;GO:0055114//oxidation-reduction process	K17231//iodotyrosine deiodinase [EC:1.21.1.1]	gi|118088376|ref|XP_419670.2|//PREDICTED: iodotyrosine deiodinase 1 [Gallus gallus]
417058	1106	622.21	224.75	-1.45725	6.4037e-43	Down	2.15701e-43	LOC417058	NA	NA	NA	K06751//major histocompatibility complex, class I	gi|971444411|ref|XP_015157552.1|//PREDICTED: class I histocompatibility antigen, F10 alpha chain-like [Gallus gallus]
423435	1537	204	14	-3.85324	6.92251e-43	Down	2.33434e-43	SERPINA5	NA	NA	NA	K04525//serpin peptidase inhibitor, clade A	gi|50748652|ref|XP_421344.1|//PREDICTED: alpha-1-antitrypsin isoform X1 [Gallus gallus]
107054731	1282	369.23	837	1.19254	9.77947e-43	Up	3.29956e-43	LOC107054731	GO:0031252//cell leading edge;GO:1904115//axon cytoplasm;GO:0005874//microtubule;GO:0008021//synaptic vesicle;GO:0043203//axon hillock;GO:0005813//centrosome;GO:0005819//spindle;GO:0000776//kinetochore;GO:0060053//neurofilament cytoskeleton;GO:0005871//kinesin complex	GO:0048487//beta-tubulin binding;GO:0043014//alpha-tubulin binding;GO:0008017//microtubule binding	GO:0000132//establishment of mitotic spindle orientation;GO:0021799//cerebral cortex radially oriented cell migration;GO:0021955//central nervous system neuron axonogenesis;GO:0090630//activation of GTPase activity;GO:0007059//chromosome segregation;GO:0051303//establishment of chromosome localization;GO:0007020//microtubule nucleation;GO:0007100//mitotic centrosome separation;GO:0051642//centros…	K16739//nuclear distribution protein NudE-like 1	gi|971424288|ref|XP_015150729.1|//PREDICTED: LOW QUALITY PROTEIN: nuclear distribution protein nudE-like 1 [Gallus gallus]
416848	1463	806	342	-1.22495	1.36615e-42	Down	4.62205e-43	RHOF	NA	NA	NA	K07872//Ras homolog gene family, member F	gi|971420787|ref|XP_015130770.1|//PREDICTED: rho-related GTP-binding protein RhoF isoform X1 [Gallus gallus];gi|971420790|ref|XP_015130771.1|//PREDICTED: rho-related GTP-binding protein RhoF isoform X2 [Gallus gallus];gi|971420792|ref|XP_015130772.1|//PREDICTED: rho-related GTP-binding protein RhoF isoform X3 [Gallus gallus];gi|497815075|ref|NP_001265081.1|//rho-related GTP-binding protein RhoF […
419694	3188	725	290	-1.3101	1.50501e-42	Down	5.09464e-43	IFNLR1	GO:0016021//integral component of membrane	NA	GO:0034342//response to type III interferon;GO:0051607//defense response to virus	K05140//interferon lambda receptor 1	gi|971431232|ref|XP_004947965.2|//PREDICTED: LOW QUALITY PROTEIN: interferon lambda receptor 1 [Gallus gallus]
419385	5408	487.62	147.74	-1.71087	1.77119e-42	Down	6.00886e-43	MEGF6	NA	NA	NA	K02258//cytochrome c oxidase assembly protein subunit 11;K02599//Notch 1	gi|971429196|ref|XP_015152573.1|//PREDICTED: multiple epidermal growth factor-like domains protein 6 isoform X4 [Gallus gallus];gi|971429194|ref|XP_004947431.2|//PREDICTED: multiple epidermal growth factor-like domains protein 6 isoform X3 [Gallus gallus];gi|971429190|ref|XP_015152571.1|//PREDICTED: multiple epidermal growth factor-like domains protein 6 isoform X1 [Gallus gallus];gi|971429192|re…
107057295	2035	509.83	1037.9	1.03741	2.46052e-42	Up	8.38407e-43	LOC107057295	NA	NA	NA	NA	gi|971427234|ref|XP_015151781.1|//PREDICTED: protein MANBAL-like isoform X2 [Gallus gallus];gi|971427258|ref|XP_015151787.1|//PREDICTED: uncharacterized protein LOC107054817 [Gallus gallus];gi|971444996|ref|XP_015157816.1|//PREDICTED: uncharacterized protein LOC107057295 isoform X2 [Gallus gallus]
769421	3805	604.78	216.75	-1.46855	3.14319e-42	Down	1.07395e-42	LOC769421	NA	NA	NA	K07809//[heparan sulfate]-glucosamine 3-sulfotransferase 3 [EC:2.8.2.30]	gi|971424320|ref|XP_015150739.1|//PREDICTED: heparan sulfate glucosamine 3-O-sulfotransferase 3B1 isoform X2 [Gallus gallus];gi|971424318|ref|XP_003642370.3|//PREDICTED: heparan sulfate glucosamine 3-O-sulfotransferase 3B1 isoform X1 [Gallus gallus]
373983	6739	462.8	134.83	-1.76742	3.34378e-42	Down	1.1431e-42	BRCA1	GO:0005654//nucleoplasm;GO:0000794//condensed nuclear chromosome;GO:0030529//intracellular ribonucleoprotein complex;GO:0031436//BRCA1-BARD1 complex;GO:0005737//cytoplasm;GO:0005886//plasma membrane;GO:0070531//BRCA1-A complex	GO:0003723//RNA binding;GO:0003684//damaged DNA binding;GO:0008270//zinc ion binding;GO:0031625//ubiquitin protein ligase binding;GO:0044212//transcription regulatory region DNA binding;GO:0004842//ubiquitin-protein transferase activity	GO:0007098//centrosome cycle;GO:0006260//DNA replication;GO:0006349//regulation of gene expression by genetic imprinting;GO:0042127//regulation of cell proliferation;GO:0071356//cellular response to tumor necrosis factor;GO:0043009//chordate embryonic development;GO:0043627//response to estrogen;GO:0085020//protein K6-linked ubiquitination;GO:0045739//positive regulation of DNA repair;GO:0051572/…	K10605//breast cancer type 1 susceptibility protein [EC:2.3.2.27]	gi|45383782|ref|NP_989500.1|//breast cancer type 1 susceptibility protein [Gallus gallus];gi|971435316|ref|XP_015155047.1|//PREDICTED: breast cancer type 1 susceptibility protein isoform X1 [Gallus gallus];gi|971435320|ref|XP_015155049.1|//PREDICTED: breast cancer type 1 susceptibility protein isoform X2 [Gallus gallus]
395422	6735	428.8	920.49	1.11393	3.65426e-42	Up	1.2506e-42	OPCML	GO:0070062//extracellular exosome;GO:0005886//plasma membrane;GO:0031225//anchored component of membrane	NA	GO:0007155//cell adhesion	K06773//opioid binding protein/cell adhesion molecule-like	gi|45382721|ref|NP_990018.1|//opioid-binding protein/cell adhesion molecule homolog precursor [Gallus gallus];gi|326933263|ref|XP_003212726.1|//PREDICTED: opioid-binding protein/cell adhesion molecule isoform X2 [Meleagris gallopavo];gi|733920577|ref|XP_010721925.1|//PREDICTED: opioid-binding protein/cell adhesion molecule isoform X3 [Meleagris gallopavo]
419806	3091	235.07	26.48	-3.13829	4.95007e-42	Down	1.69776e-42	KCNC4	GO:0031594//neuromuscular junction;GO:0043679//axon terminus;GO:0008076//voltage-gated potassium channel complex	GO:0005249//voltage-gated potassium channel activity	GO:0034765//regulation of ion transmembrane transport;GO:0046928//regulation of neurotransmitter secretion;GO:0051260//protein homooligomerization;GO:0071805//potassium ion transmembrane transport	K04890//potassium voltage-gated channel Shaw-related subfamily C member 4	gi|363743026|ref|XP_003642768.1|//PREDICTED: potassium voltage-gated channel subfamily C member 4 isoform X2 [Gallus gallus];gi|513224387|ref|XP_004934926.1|//PREDICTED: potassium voltage-gated channel subfamily C member 4 isoform X1 [Gallus gallus]
431664	5823	121	431	1.84451	4.99837e-42	Up	1.71525e-42	RXFP3	NA	NA	NA	K08397//relaxin family peptide receptor 3	gi|513228810|ref|XP_004937231.1|//PREDICTED: relaxin-3 receptor 1 [Gallus gallus]
416575	2509	510	162	-1.64267	5.86495e-42	Down	2.0159e-42	PLK1	NA	NA	NA	K06631//polo-like kinase 1 [EC:2.7.11.21]	gi|71894745|ref|NP_001025810.1|//serine/threonine-protein kinase PLK1 [Gallus gallus]
428593	2585	188.04	10	-4.22114	8.37083e-42	Down	2.88345e-42	LOC428593	NA	NA	NA	K01315//plasminogen [EC:3.4.21.7]	gi|513176219|ref|XP_426150.3|//PREDICTED: plasminogen-like [Gallus gallus]
423436	4722	188	10	-4.22083	8.56517e-42	Down	2.95199e-42	SERPINA9	NA	NA	NA	K04525//serpin peptidase inhibitor, clade A	gi|513188841|ref|XP_004941955.1|//PREDICTED: alpha-1-antitrypsin [Gallus gallus]
374258	1530	252	34	-2.87799	1.71307e-41	Down	5.92639e-42	F9	GO:0070062//extracellular exosome;GO:0005615//extracellular space	GO:0004252//serine-type endopeptidase activity;GO:0005509//calcium ion binding	GO:0007596//blood coagulation;GO:0031638//zymogen activation	K01321//coagulation factor IX (Christmas factor) [EC:3.4.21.22]	gi|45383468|ref|NP_989674.1|//coagulation factor IX precursor [Gallus gallus];gi|971391220|ref|XP_015133666.1|//PREDICTED: coagulation factor IX isoform X1 [Gallus gallus]
107053156	1162	292	51	-2.50557	1.83605e-41	Down	6.35526e-42	KHK	NA	NA	NA	K00846//ketohexokinase [EC:2.7.1.3]	gi|971390523|ref|XP_015140518.1|//PREDICTED: ketohexokinase [Gallus gallus]
107052288	4054	405.4	106.16	-1.92128	1.90957e-41	Down	6.6133e-42	LOC107052288	GO:0019028//viral capsid;GO:0019031//viral envelope;GO:0016021//integral component of membrane	GO:0008270//zinc ion binding;GO:0005198//structural molecule activity;GO:0003676//nucleic acid binding;GO:0004190//aspartic-type endopeptidase activity	GO:0006508//proteolysis;GO:0016032//viral process	K19364//magnesium transporter NIPA1;K06240//laminin, alpha 3/5	gi|971439028|ref|XP_015135706.1|//PREDICTED: uncharacterized protein LOC107052288 [Gallus gallus]
107057199	1161	205.67	0	-8.67236	2.77031e-41	Down	9.60972e-42	LOC107057199	NA	NA	NA	K11514//Borealin	gi|971444698|ref|XP_015157682.1|//PREDICTED: borealin-like isoform X1 [Gallus gallus]
100857767	4224	1022.73	495.4	-1.03393	3.42124e-41	Down	1.1874e-41	FOXO6	NA	NA	NA	K09408//forkhead box protein O3	gi|971430419|ref|XP_015153061.1|//PREDICTED: forkhead box protein O6 [Gallus gallus]
421507	6928	441	126	-1.79552	3.84254e-41	Down	1.33577e-41	GREM2	NA	NA	NA	K19558//neuroblastoma suppressor of tumorigenicity 1	gi|971387493|ref|XP_015139440.1|//PREDICTED: gremlin-2 isoform X1 [Gallus gallus]
100858385	1863	751.16	313.97	-1.24666	7.17703e-41	Down	2.50026e-41	LOC100858385	NA	NA	NA	K14377//osteoclast-associated immunoglobulin-like receptor;K06264//platelet glycoprotein VI;K06512//leukocyte immunoglobulin-like receptor	gi|971449604|ref|XP_015129551.1|//PREDICTED: osteoclast-associated immunoglobulin-like receptor [Gallus gallus]
416244	2703	965	458	-1.06335	1.03487e-40	Down	3.61289e-41	ADAM19	GO:0005794//Golgi apparatus;GO:0016021//integral component of membrane	GO:0004222//metalloendopeptidase activity;GO:0008270//zinc ion binding	GO:0006509//membrane protein ectodomain proteolysis;GO:0007507//heart development	K08608//disintegrin and metalloproteinase domain-containing protein 19 [EC:3.4.24.-]	gi|304376253|ref|NP_001182051.1|//disintegrin and metalloproteinase domain-containing protein 19 precursor [Gallus gallus]
428967	2380	246	33	-2.88629	1.18349e-40	Down	4.13833e-41	LOC428967	NA	NA	NA	K05189//gamma-aminobutyric acid receptor subunit pi	gi|971403161|ref|XP_426524.3|//PREDICTED: gamma-aminobutyric acid receptor subunit pi-like [Gallus gallus]
424326	1857	92	369	2.01575	1.49563e-40	Up	5.23259e-41	UPP2	NA	NA	NA	K00757//uridine phosphorylase [EC:2.4.2.3]	gi|118093961|ref|XP_422171.2|//PREDICTED: uridine phosphorylase 2 isoform X2 [Gallus gallus];gi|971406783|ref|XP_015145676.1|//PREDICTED: uridine phosphorylase 2 isoform X1 [Gallus gallus]
395729	969	735	305	-1.2571	1.57119e-40	Down	5.49986e-41	PCBD1	GO:0070062//extracellular exosome;GO:0005654//nucleoplasm;GO:0005737//cytoplasm	GO:0004505//phenylalanine 4-monooxygenase activity;GO:0042802//identical protein binding;GO:0008124//4-alpha-hydroxytetrahydrobiopterin dehydratase activity	GO:0051291//protein heterooligomerization;GO:0051289//protein homotetramerization;GO:0006355//regulation of transcription, DNA-templated;GO:0006729//tetrahydrobiopterin biosynthetic process;GO:0055114//oxidation-reduction process	K01724//4a-hydroxytetrahydrobiopterin dehydratase [EC:4.2.1.96]	gi|45382483|ref|NP_990236.1|//pterin-4-alpha-carbinolamine dehydratase [Gallus gallus]
418330	1715	235	29	-3.00671	1.98396e-40	Down	6.94842e-41	HGD	NA	NA	NA	K00451//homogentisate 1,2-dioxygenase [EC:1.13.11.5]	gi|50729534|ref|XP_416553.1|//PREDICTED: homogentisate 1,2-dioxygenase [Gallus gallus]
423663	2047	527	1047	1.00222	2.02767e-40	Up	7.10527e-41	TMEM26	NA	NA	NA	NA	gi|313760688|ref|NP_001186527.1|//transmembrane protein 26 [Gallus gallus]
100859035	1475	801.38	349.21	-1.18656	2.37141e-40	Down	8.31863e-41	LOC100859035	NA	NA	NA	K06264//platelet glycoprotein VI;K06512//leukocyte immunoglobulin-like receptor	gi|971450284|ref|XP_015129823.1|//PREDICTED: T-cell-interacting, activating receptor on myeloid cells protein 1-like, partial [Gallus gallus]
395823	4492	712	291	-1.27903	2.41832e-40	Down	8.48767e-41	KIF4A	GO:0005634//nucleus;GO:0005874//microtubule;GO:0005694//chromosome;GO:0005737//cytoplasm;GO:0005871//kinesin complex	GO:0003677//DNA binding;GO:0005524//ATP binding;GO:0008017//microtubule binding;GO:0008574//ATP-dependent microtubule motor activity, plus-end-directed	GO:0007018//microtubule-based movement	K10395//kinesin family member 4/21/27	gi|971391242|ref|XP_015133678.1|//PREDICTED: chromosome-associated kinesin KIF4 isoform X1 [Gallus gallus];gi|45384470|ref|NP_990306.1|//chromosome-associated kinesin KIF4 [Gallus gallus]
426899	3667	234	609	1.39176	1.20937e-39	Up	4.29407e-40	FAIM2	NA	NA	NA	K07607//peripherin;K06890//uncharacterized protein	gi|971437207|ref|XP_015155868.1|//PREDICTED: protein lifeguard 2 [Gallus gallus]
421099	1016	920	433	-1.07544	1.40282e-39	Down	4.98878e-40	LOC421099	NA	NA	NA	K07903//Ras-related protein Rab-10	gi|971383843|ref|XP_419183.4|//PREDICTED: ras-related protein Rab-10 isoform X1 [Gallus gallus];gi|971383847|ref|XP_015138096.1|//PREDICTED: ras-related protein Rab-10 isoform X3 [Gallus gallus];gi|971383845|ref|XP_015138095.1|//PREDICTED: ras-related protein Rab-10 isoform X2 [Gallus gallus]
415482	1497	234	30	-2.95164	1.40652e-39	Down	5.00455e-40	FAH	NA	NA	NA	K01555//fumarylacetoacetase [EC:3.7.1.2]	gi|477507232|ref|NP_001264402.1|//fumarylacetoacetase [Gallus gallus]
418903	6989	291	55	-2.39169	2.99385e-39	Down	1.07025e-39	DCLK1	NA	GO:0004674//protein serine/threonine kinase activity;GO:0005524//ATP binding	GO:0048675//axon extension;GO:0006468//protein phosphorylation;GO:0035556//intracellular signal transduction;GO:0048813//dendrite morphogenesis;GO:0030900//forebrain development;GO:0001764//neuron migration;GO:0021952//central nervous system projection neuron axonogenesis;GO:0009615//response to virus	K08805//doublecortin-like kinase 1/2 [EC:2.7.11.1]	gi|971377931|ref|XP_015133290.1|//PREDICTED: serine/threonine-protein kinase DCLK1 isoform X1 [Gallus gallus];gi|699673083|ref|XP_009901136.1|//PREDICTED: serine/threonine-protein kinase DCLK1 isoform X2 [Picoides pubescens];gi|529442977|ref|XP_005241212.1|//PREDICTED: serine/threonine-protein kinase DCLK1 isoform X3 [Falco peregrinus];gi|971377937|ref|XP_015133306.1|//PREDICTED: serine/threonine…
427605	4300	695.31	287.2	-1.26377	9.87772e-39	Down	3.56236e-39	PSD2	NA	NA	NA	K12494//PH and SEC7 domain-containing protein	gi|513205994|ref|XP_003642088.2|//PREDICTED: PH and SEC7 domain-containing protein 2 isoform X1 [Gallus gallus];gi|513205997|ref|XP_004944800.1|//PREDICTED: PH and SEC7 domain-containing protein 2 isoform X2 [Gallus gallus]
422379	7775	561	204	-1.4476	1.7545e-38	Down	6.35363e-39	IL1RAPL2	NA	NA	NA	K05170//interleukin 1 receptor accessory protein-like	gi|971392419|ref|XP_015134123.1|//PREDICTED: X-linked interleukin-1 receptor accessory protein-like 2 isoform X1 [Gallus gallus];gi|971392423|ref|XP_015134125.1|//PREDICTED: X-linked interleukin-1 receptor accessory protein-like 2 isoform X3 [Gallus gallus];gi|971392421|ref|XP_015134124.1|//PREDICTED: X-linked interleukin-1 receptor accessory protein-like 2 isoform X2 [Gallus gallus]
768760	5346	438	905	1.05882	2.53274e-38	Up	9.21429e-39	LOC768760	NA	NA	NA	K16499//protocadherin delta 2	gi|166837996|gb|ABY91218.1|//protocadherin delta 1 [Gallus gallus]
416984	8410	388	107	-1.84662	9.5197e-38	Down	3.49698e-38	CIT	GO:0016020//membrane;GO:0005622//intracellular	GO:0097110//scaffold protein binding;GO:0046872//metal ion binding;GO:0004674//protein serine/threonine kinase activity;GO:0005524//ATP binding;GO:0030165//PDZ domain binding	GO:0032467//positive regulation of cytokinesis;GO:0006468//protein phosphorylation;GO:0035556//intracellular signal transduction	K16308//citron Rho-interacting kinase [EC:2.7.11.1]	gi|971421026|ref|XP_015130880.1|//PREDICTED: citron Rho-interacting kinase isoform X10 [Gallus gallus];gi|513210936|ref|XP_004934460.1|//PREDICTED: citron Rho-interacting kinase isoform X3 [Gallus gallus];gi|971421023|ref|XP_015130879.1|//PREDICTED: citron Rho-interacting kinase isoform X8 [Gallus gallus];gi|971421018|ref|XP_015130877.1|//PREDICTED: citron Rho-interacting kinase isoform X5 [Gallu…
107057173	1758	289.74	58.3	-2.30136	2.0671e-37	Down	7.62791e-38	LOC107057173	NA	NA	NA	NA	gi|971444696|ref|XP_015157681.1|//PREDICTED: endogenous retrovirus group K member 8 Gag polyprotein-like [Gallus gallus]
418726	1717	649.1	264.24	-1.28476	3.64268e-37	Down	1.35369e-37	FHL2	GO:0005634//nucleus;GO:0005925//focal adhesion;GO:0015629//actin cytoskeleton	GO:0042802//identical protein binding;GO:0008270//zinc ion binding;GO:0008134//transcription factor binding	GO:0000122//negative regulation of transcription from RNA polymerase II promoter;GO:0001649//osteoblast differentiation;GO:0055015//ventricular cardiac muscle cell development;GO:0009725//response to hormone;GO:0055014//atrial cardiac muscle cell development;GO:0060347//heart trabecula formation;GO:0043066//negative regulation of apoptotic process	K14380//four and a half LIM domains protein 2	gi|326913801|ref|XP_003203222.1|//PREDICTED: four and a half LIM domains protein 2 [Meleagris gallopavo]
427213	3739	406	119	-1.75869	5.70104e-37	Down	2.12922e-37	F2RL1	NA	NA	NA	K04234//coagulation factor II (thrombin) receptor-like 1	gi|60302858|ref|NP_001012626.1|//proteinase-activated receptor 2 precursor [Gallus gallus]
107056507	701	673.97	281.18	-1.24936	5.94531e-37	Down	2.22156e-37	LOC107056507	GO:0005747//mitochondrial respiratory chain complex I	GO:0051539//4 iron, 4 sulfur cluster binding;GO:0008137//NADH dehydrogenase (ubiquinone) activity	GO:0006979//response to oxidative stress;GO:0032981//mitochondrial respiratory chain complex I assembly;GO:0055114//oxidation-reduction process	K03941//NADH dehydrogenase (ubiquinone) Fe-S protein 8 [EC:1.6.5.3 1.6.99.3]	gi|971443191|ref|XP_015157022.1|//PREDICTED: LOW QUALITY PROTEIN: NADH-ubiquinone oxidoreductase subunit 8-like, partial [Gallus gallus]
107055281	1010	151.7	457.42	1.60413	7.24934e-37	Up	2.71422e-37	PDK2	NA	NA	NA	K00898//pyruvate dehydrogenase kinase 2/3/4 [EC:2.7.11.2]	gi|971435022|ref|XP_015154925.1|//PREDICTED: pyruvate dehydrogenase kinase, isozyme 2 [Gallus gallus]
395300	1595	165	9	-4.18457	1.04796e-36	Down	3.9295e-37	SULT1C3	GO:0005737//cytoplasm	GO:0004062//aryl sulfotransferase activity;GO:0004027//alcohol sulfotransferase activity	GO:0006790//sulfur compound metabolic process	K01025//null	gi|45382969|ref|NP_989932.1|//sulfotransferase 1C1 [Gallus gallus]
424060	5105	952	471	-1.0034	1.12338e-36	Down	4.21858e-37	PLCL1	NA	NA	NA	K15375//inactive phospholipase C-like protein 1	gi|363735876|ref|XP_421916.3|//PREDICTED: inactive phospholipase C-like protein 1 [Gallus gallus]
426786	10293	609.9	241.95	-1.32203	1.56912e-36	Down	5.9158e-37	ZMAT4	GO:0005634//nucleus	GO:0003723//RNA binding;GO:0002039//p53 binding;GO:0008270//zinc ion binding	GO:0072332//intrinsic apoptotic signaling pathway by p53 class mediator	K10137//zinc finger, matrin type 3	gi|971430002|ref|XP_004947662.2|//PREDICTED: zinc finger matrin-type protein 4 [Gallus gallus]
374201	992	249.03	42	-2.55603	2.31297e-36	Down	8.74601e-37	PITX1	GO:0005730//nucleolus;GO:0005667//transcription factor complex;GO:0005737//cytoplasm	GO:0001190//transcriptional activator activity, RNA polymerase II transcription factor binding;GO:0000978//RNA polymerase II core promoter proximal region sequence-specific DNA binding;GO:0001077//transcriptional activator activity, RNA polymerase II core promoter proximal region sequence-specific binding	GO:0045892//negative regulation of transcription, DNA-templated;GO:0014707//branchiomeric skeletal muscle development;GO:0021983//pituitary gland development;GO:0035116//embryonic hindlimb morphogenesis;GO:0045944//positive regulation of transcription from RNA polymerase II promoter;GO:0048625//myoblast fate commitment;GO:0051216//cartilage development	K09356//paired-like homeodomain transcription factor 1	gi|971418348|ref|XP_015149472.1|//PREDICTED: pituitary homeobox 1 isoform X1 [Gallus gallus];gi|267844835|ref|NP_001161156.1|//pituitary homeobox 1 [Gallus gallus]
107051573	2405	189	18	-3.38049	2.80875e-36	Down	1.06416e-36	PLA2G3	NA	NA	NA	K01047//secretory phospholipase A2 [EC:3.1.1.4]	gi|971420912|ref|XP_015130838.1|//PREDICTED: group 3 secretory phospholipase A2 [Gallus gallus]
424563	1686	576	222	-1.36368	3.38088e-36	Down	1.28344e-36	CDC20	NA	NA	NA	K03363//cell division cycle 20, cofactor of APC complex	gi|57529659|ref|NP_001006536.1|//cell division cycle protein 20 homolog [Gallus gallus]
107049066	2708	148.1	3	-5.61364	3.6986e-36	Down	1.40474e-36	LOC107049066	GO:0016021//integral component of membrane;GO:0005886//plasma membrane	GO:0004984//olfactory receptor activity;GO:0004930//G-protein coupled receptor activity	GO:0007186//G-protein coupled receptor signaling pathway;GO:0050911//detection of chemical stimulus involved in sensory perception of smell	K04257//olfactory receptor	gi|971378961|ref|XP_015136430.1|//PREDICTED: olfactory receptor 51G2-like [Gallus gallus]
396189	1728	226.71	32.89	-2.7733	3.74213e-36	Down	1.42197e-36	VSNL1	NA	NA	NA	K19936//visinin-like protein 1	gi|971390363|ref|XP_015140436.1|//PREDICTED: visinin-like protein 1 isoform X1 [Gallus gallus];gi|697499026|ref|XP_009678838.1|//PREDICTED: visinin-like protein 1 isoform X2 [Struthio camelus australis]
395726	2888	193	19.73	-3.27831	4.19092e-36	Down	1.59406e-36	FTCD	GO:0005814//centriole;GO:0070062//extracellular exosome;GO:0005829//cytosol;GO:0030868//smooth endoplasmic reticulum membrane;GO:0000139//Golgi membrane	GO:0005542//folic acid binding;GO:0030412//formimidoyltetrahydrofolate cyclodeaminase activity;GO:0030409//glutamate formimidoyltransferase activity;GO:0008017//microtubule binding	GO:0019557//histidine catabolic process to glutamate and formate;GO:0035999//tetrahydrofolate interconversion;GO:0019556//histidine catabolic process to glutamate and formamide	K13990//glutamate formiminotransferase / formiminotetrahydrofolate cyclodeaminase [EC:2.1.2.5 4.3.1.4]	gi|971403995|ref|XP_015144607.1|//PREDICTED: formimidoyltransferase-cyclodeaminase isoform X2 [Gallus gallus];gi|971403997|ref|XP_015144608.1|//PREDICTED: formimidoyltransferase-cyclodeaminase isoform X3 [Gallus gallus];gi|971404001|ref|XP_015144610.1|//PREDICTED: formimidoyltransferase-cyclodeaminase isoform X5 [Gallus gallus];gi|971403999|ref|XP_015144609.1|//PREDICTED: formimidoyltransferase-c…
420708	5454	454.25	149	-1.59634	4.30361e-36	Down	1.63773e-36	KIF15	NA	NA	NA	K10400//kinesin family member 15	gi|971380722|ref|XP_015137220.1|//PREDICTED: kinesin-like protein KIF15 [Gallus gallus]
772317	606	236	37	-2.66136	4.92203e-36	Down	1.87398e-36	PRIMA1	GO:0016021//integral component of membrane	NA	NA	NA	gi|971399505|ref|XP_015143053.1|//PREDICTED: proline-rich membrane anchor 1 isoform X1 [Gallus gallus];gi|224458366|ref|NP_001138964.1|//proline-rich membrane anchor 1 precursor [Gallus gallus]
416817	3168	436	139	-1.63741	6.12068e-36	Down	2.3349e-36	CCDC92	GO:0005814//centriole	NA	NA	K16452//coiled-coil domain-containing protein 92	gi|118098438|ref|XP_415108.2|//PREDICTED: coiled-coil domain-containing protein 92 [Gallus gallus]
423374	1028	801.03	371.48	-1.09674	9.75573e-36	Down	3.73429e-36	GSTZ1	NA	NA	NA	K01800//maleylacetoacetate isomerase [EC:5.2.1.2]	gi|477507224|ref|NP_001264398.1|//maleylacetoacetate isomerase isoform 2 [Gallus gallus];gi|477507226|ref|NP_001264399.1|//maleylacetoacetate isomerase isoform 3 [Gallus gallus];gi|971399186|ref|XP_015142882.1|//PREDICTED: maleylacetoacetate isomerase isoform X1 [Gallus gallus];gi|971399188|ref|XP_015142883.1|//PREDICTED: maleylacetoacetate isomerase isoform X2 [Gallus gallus];gi|477507214|ref|NP…
374080	4527	899.4	439.48	-1.02134	1.01459e-35	Down	3.88551e-36	TLE4	GO:0005634//nucleus	GO:0003714//transcription corepressor activity;GO:0003682//chromatin binding;GO:0070491//repressing transcription factor binding;GO:0003705//transcription factor activity, RNA polymerase II distal enhancer sequence-specific binding	GO:0001709//cell fate determination;GO:0030901//midbrain development;GO:0003002//regionalization;GO:0010628//positive regulation of gene expression;GO:0000122//negative regulation of transcription from RNA polymerase II promoter;GO:0016055//Wnt signaling pathway;GO:0007164//establishment of tissue polarity;GO:0048859//formation of anatomical boundary	K04497//groucho	gi|45383652|ref|NP_989568.1|//transducin-like enhancer protein 4 [Gallus gallus];gi|971439071|ref|XP_015135718.1|//PREDICTED: transducin-like enhancer protein 4 isoform X1 [Gallus gallus]
101751218	1422	360	98	-1.86531	1.33343e-35	Down	5.12394e-36	MXD3	NA	NA	NA	K09114//MAX dimerization protein	gi|971417996|ref|XP_015149347.1|//PREDICTED: max dimerization protein 3 isoform X2 [Gallus gallus];gi|971417998|ref|XP_015149348.1|//PREDICTED: max dimerization protein 3 isoform X3 [Gallus gallus];gi|971417994|ref|XP_015149346.1|//PREDICTED: max dimerization protein 3 isoform X1 [Gallus gallus]
395358	3675	382	110	-1.78424	1.49545e-35	Down	5.7493e-36	BCHE	GO:0005783//endoplasmic reticulum;GO:0072562//blood microparticle;GO:0005641//nuclear envelope lumen	GO:0042802//identical protein binding;GO:0003990//acetylcholinesterase activity	NA	K01050//cholinesterase [EC:3.1.1.8]	gi|45382845|ref|NP_989977.1|//cholinesterase precursor [Gallus gallus];gi|971411284|ref|XP_015147122.1|//PREDICTED: cholinesterase isoform X1 [Gallus gallus];gi|971411288|ref|XP_015147125.1|//PREDICTED: cholinesterase isoform X2 [Gallus gallus]
427991	2097	216	30	-2.83617	2.75581e-35	Down	1.06051e-35	XK	GO:0005623//cell;GO:0016021//integral component of membrane	NA	GO:0042552//myelination;GO:0010961//cellular magnesium ion homeostasis;GO:0008361//regulation of cell size;GO:0031133//regulation of axon diameter;GO:0006874//cellular calcium ion homeostasis;GO:0048741//skeletal muscle fiber development	K19522//membrane transport protein XK	gi|77736631|ref|NP_001029994.1|//membrane transport protein XK precursor [Gallus gallus]
415531	2133	159	9	-4.13113	3.47021e-35	Down	1.33865e-35	SLC51B	NA	NA	NA	K14361//organic solute transporter subunit beta	gi|971413660|ref|XP_015147742.1|//PREDICTED: organic solute transporter subunit beta [Gallus gallus]
107051451	610	339.96	88.56	-1.92881	3.49693e-35	Down	1.34961e-35	LOC107051451	NA	NA	NA	K02147//V-type H+-transporting ATPase subunit B	gi|971452012|ref|XP_015130543.1|//PREDICTED: V-type proton ATPase subunit B-like [Gallus gallus]
418533	9168	168.77	475.53	1.50631	4.85447e-35	Up	1.87896e-35	ABCG1	NA	NA	NA	K05679//ATP-binding cassette, subfamily G (WHITE), member 1	gi|118083943|ref|XP_416742.2|//PREDICTED: ATP-binding cassette sub-family G member 1 [Gallus gallus]
107052504	2967	107.06	367.85	1.79253	8.98418e-35	Up	3.49577e-35	LOC107052504	NA	NA	NA	K04257//olfactory receptor;K14401//cleavage and polyadenylation specificity factor subunit 1;K21125//mucin-5AC;K01495//GTP cyclohydrolase I [EC:3.5.4.16]	gi|971380363|ref|XP_015137090.1|//PREDICTED: endogenous retrovirus group K member 18 Pol protein-like [Gallus gallus]
427260	2651	180	492	1.46249	1.02777e-34	Up	4.01054e-35	GCNT1	GO:0016020//membrane;GO:0031985//Golgi cisterna;GO:0005802//trans-Golgi network	GO:0008375//acetylglucosaminyltransferase activity	GO:0009101//glycoprotein biosynthetic process;GO:0048729//tissue morphogenesis;GO:0060352//cell adhesion molecule production;GO:0060993//kidney morphogenesis;GO:0050901//leukocyte tethering or rolling	K00727//beta-1,3-galactosyl-O-glycosyl-glycoprotein beta-1,6-N-acetylglucosaminyltransferase [EC:2.4.1.102]	gi|363744527|ref|XP_003643070.1|//PREDICTED: beta-1,3-galactosyl-O-glycosyl-glycoprotein beta-1,6-N-acetylglucosaminyltransferase [Gallus gallus]
107056498	452	55.34	267.53	2.28514	1.17818e-34	Up	4.60185e-35	LOC107056498	NA	NA	NA	NA	gi|971443176|ref|XP_015157015.1|//PREDICTED: apoptosis inhibitor 5-like, partial [Gallus gallus]
427214	1808	151	7	-4.41922	1.24162e-34	Down	4.85429e-35	CRHBP	GO:0005615//extracellular space;GO:0005634//nucleus;GO:0030141//secretory granule	GO:0051424//corticotropin-releasing hormone binding	GO:0033554//cellular response to stress;GO:0035690//cellular response to drug;GO:0042445//hormone metabolic process;GO:0071356//cellular response to tumor necrosis factor;GO:0071320//cellular response to cAMP;GO:2000310//regulation of NMDA receptor activity;GO:0097211//cellular response to gonadotropin-releasing hormone;GO:0071277//cellular response to calcium ion;GO:0009755//hormone-mediated sig…	NA	gi|513229633|ref|XP_003643006.2|//PREDICTED: corticotropin-releasing factor-binding protein [Gallus gallus]
417067	1184	166.17	468.57	1.50743	1.37573e-34	Up	5.38373e-35	MICA	NA	NA	NA	K06751//major histocompatibility complex, class I	gi|971444458|ref|XP_015157573.1|//PREDICTED: class I histocompatibility antigen, F10 alpha chain-like [Gallus gallus]
414797	7522	573	228	-1.31767	3.01043e-34	Down	1.18257e-34	ST8SIA5	GO:0030173//integral component of Golgi membrane	GO:0003828//alpha-N-acetylneuraminate alpha-2,8-sialyltransferase activity	GO:0006486//protein glycosylation;GO:0097503//sialylation	K03369//alpha-N-acetyl-neuraminate alpha-2,8-sialyltransferase (sialyltransferase 8E) [EC:2.4.99.-]	gi|971437822|ref|XP_015132901.1|//PREDICTED: alpha-2,8-sialyltransferase 8E isoform X2 [Gallus gallus];gi|513228213|ref|XP_004949086.1|//PREDICTED: alpha-2,8-sialyltransferase 8E isoform X1 [Gallus gallus];gi|971437824|ref|XP_015132902.1|//PREDICTED: alpha-2,8-sialyltransferase 8E isoform X3 [Gallus gallus]
101749412	1070	9.56	155.16	4.03243	3.51601e-34	Up	1.38575e-34	LOC101749412	NA	NA	NA	K14165//atypical dual specificity phosphatase [EC:3.1.3.16 3.1.3.48];K04257//olfactory receptor	gi|971446650|ref|XP_015128324.1|//PREDICTED: coiled-coil domain-containing protein 81-like isoform X1 [Gallus gallus];gi|971446656|ref|XP_015128327.1|//PREDICTED: coiled-coil domain-containing protein 81-like isoform X2 [Gallus gallus]
424531	2561	191	22	-3.10617	3.88292e-34	Down	1.5318e-34	MCOLN2	GO:0016021//integral component of membrane	NA	NA	K04993//mucolipin 2	gi|118094368|ref|XP_422368.2|//PREDICTED: mucolipin-2 isoform X1 [Gallus gallus];gi|513197394|ref|XP_004936703.1|//PREDICTED: mucolipin-2 isoform X2 [Gallus gallus]
426884	2225	434	144	-1.5798	4.64163e-34	Down	1.83801e-34	RACGAP1	GO:0070062//extracellular exosome;GO:0005654//nucleoplasm;GO:0032154//cleavage furrow;GO:0051233//spindle midzone;GO:0097149//centralspindlin complex;GO:0031234//extrinsic component of cytoplasmic side of plasma membrane;GO:0030496//midbody	GO:0008017//microtubule binding;GO:0019901//protein kinase binding;GO:0046872//metal ion binding;GO:0043015//gamma-tubulin binding;GO:0005547//phosphatidylinositol-3,4,5-trisphosphate binding;GO:0048487//beta-tubulin binding;GO:0043014//alpha-tubulin binding;GO:0005096//GTPase activator activity	GO:0032467//positive regulation of cytokinesis;GO:0000915//actomyosin contractile ring assembly;GO:0008272//sulfate transport;GO:0035556//intracellular signal transduction;GO:0043547//positive regulation of GTPase activity;GO:0007283//spermatogenesis;GO:0051256//mitotic spindle midzone assembly;GO:0007405//neuroblast proliferation;GO:0000281//mitotic cytokinesis;GO:0051988//regulation of attachme…	K16733//Rac GTPase-activating protein 1	gi|971436902|ref|XP_004949789.2|//PREDICTED: rac GTPase-activating protein 1 [Gallus gallus]
396138	3208	156	447.95	1.53362	6.02427e-34	Up	2.39e-34	GRIA3	NA	NA	NA	K05199//glutamate receptor 3	gi|164419728|ref|NP_001106270.1|//glutamate receptor 3 isoform 1 precursor [Gallus gallus];gi|164419726|ref|NP_990546.2|//glutamate receptor 3 isoform 2 precursor [Gallus gallus];gi|971391250|ref|XP_015133684.1|//PREDICTED: glutamate receptor 3 isoform X2 [Gallus gallus];gi|971391248|ref|XP_015133682.1|//PREDICTED: glutamate receptor 3 isoform X1 [Gallus gallus]
101747531	619	678	298	-1.17414	7.71074e-34	Down	3.06911e-34	LOC101747531	NA	NA	NA	NA	gi|971403094|ref|XP_015144283.1|//PREDICTED: arginine vasopressin-induced protein 1 [Gallus gallus]
396301	1519	623	262	-1.23784	8.31773e-34	Down	3.31381e-34	HOXD8	GO:0005634//nucleus	GO:0001228//transcriptional activator activity, RNA polymerase II transcription regulatory region sequence-specific binding;GO:0000977//RNA polymerase II regulatory region sequence-specific DNA binding	GO:0000122//negative regulation of transcription from RNA polymerase II promoter;GO:0009952//anterior/posterior pattern specification;GO:0045944//positive regulation of transcription from RNA polymerase II promoter;GO:0048705//skeletal system morphogenesis	K09308//homeobox protein HoxB/C/D8	gi|971404654|ref|XP_015144874.1|//PREDICTED: homeobox protein Hox-D8 isoform X1 [Gallus gallus];gi|46395474|ref|NP_997060.1|//homeobox protein Hox-D8 [Gallus gallus];gi|971404656|ref|XP_015144875.1|//PREDICTED: homeobox protein Hox-D8 isoform X2 [Gallus gallus]
100857247	2030	592.42	242.6	-1.27621	1.00738e-33	Down	4.01532e-34	TUBA4A	GO:0005874//microtubule	GO:0005200//structural constituent of cytoskeleton;GO:0005525//GTP binding;GO:0003924//GTPase activity	GO:0007017//microtubule-based process	K07374//tubulin alpha	gi|971406568|ref|XP_003641692.2|//PREDICTED: tubulin alpha-4A chain [Gallus gallus]
107057303	1272	7.4	146.39	4.31798	1.58675e-33	Up	6.35118e-34	LOC107057303	NA	NA	NA	K09228//KRAB domain-containing zinc finger protein;K05706//snail 2;K09216//ovo	gi|971445019|ref|XP_015157825.1|//PREDICTED: zinc finger protein 217-like, partial [Gallus gallus]
101752219	485	607	253	-1.25073	1.70986e-33	Down	6.85665e-34	LOC101752219	NA	NA	NA	NA	gi|513217799|ref|XP_004947084.1|//PREDICTED: elafin [Gallus gallus]
395134	4155	422	139	-1.59033	1.81276e-33	Down	7.27267e-34	NDC80	GO:0016020//membrane;GO:0005815//microtubule organizing center;GO:0000942//condensed nuclear chromosome outer kinetochore;GO:0005737//cytoplasm;GO:0031262//Ndc80 complex	GO:0042802//identical protein binding;GO:0005200//structural constituent of cytoskeleton	GO:0000132//establishment of mitotic spindle orientation;GO:0051315//attachment of mitotic spindle microtubules to kinetochore;GO:0051301//cell division;GO:0007052//mitotic spindle organization	K11547//kinetochore protein NDC80	gi|54020712|ref|NP_989808.2|//kinetochore protein NDC80 homolog [Gallus gallus] ;gi|82093367|sp|Q76I89.1|NDC80_CHICK//RecName: Full=Kinetochore protein NDC80 homolog; AltName: Full=Kinetochore protein Hec1; AltName: Full=Kinetochore-associated protein 2
396484	1312	157.8	11	-3.83069	2.08875e-33	Down	8.3838e-34	MSX1	GO:0005654//nucleoplasm;GO:0005737//cytoplasm	GO:0000982//transcription factor activity, RNA polymerase II core promoter proximal region sequence-specific binding;GO:0001228//transcriptional activator activity, RNA polymerase II transcription regulatory region sequence-specific binding;GO:0000977//RNA polymerase II regulatory region sequence-specific DNA binding;GO:0002039//p53 binding;GO:0001227//transcriptional repressor activity, RNA poly…	GO:0009952//anterior/posterior pattern specification;GO:2000678//negative regulation of transcription regulatory region DNA binding;GO:0003198//epithelial to mesenchymal transition involved in endocardial cushion formation;GO:0030901//midbrain development;GO:0090427//activation of meiosis;GO:0030513//positive regulation of BMP signaling pathway;GO:0023019//signal transduction involved in regulati…	K09341//homeobox protein MSX	gi|49170108|ref|NP_990819.1|//homeobox protein MSX-1 [Gallus gallus]
419054	4576	518.42	197.19	-1.3827	2.10909e-33	Down	8.46937e-34	CHRDL2	NA	NA	NA	K17280//chordin-like protein 2	gi|971379116|ref|XP_015136501.1|//PREDICTED: chordin-like protein 2 isoform X1 [Gallus gallus];gi|971379120|ref|XP_015136503.1|//PREDICTED: chordin-like protein 2 isoform X3 [Gallus gallus];gi|971379118|ref|XP_015136502.1|//PREDICTED: chordin-like protein 2 isoform X2 [Gallus gallus]
422468	4224	238	575	1.28443	2.37285e-33	Up	9.53736e-34	TTC29	NA	NA	NA	NA	gi|513182256|ref|XP_004941032.1|//PREDICTED: tetratricopeptide repeat protein 29 isoform X1 [Gallus gallus];gi|971394411|ref|XP_015132167.1|//PREDICTED: tetratricopeptide repeat protein 29 isoform X2 [Gallus gallus]
421226	4500	495	183	-1.42375	2.42891e-33	Down	9.77625e-34	BUB1	NA	NA	NA	K02178//checkpoint serine/threonine-protein kinase [EC:2.7.11.1]	gi|61098015|ref|NP_001012888.1|//mitotic checkpoint serine/threonine-protein kinase BUB1 [Gallus gallus]
100858368	1067	255	51	-2.3101	2.91534e-33	Down	1.17504e-33	HOXC6	NA	NA	NA	K09306//homeobox protein HoxA/B/C6	gi|363746032|ref|XP_003643502.1|//PREDICTED: homeobox protein Hox-C6 isoform X2 [Gallus gallus];gi|971437125|ref|XP_015155838.1|//PREDICTED: homeobox protein Hox-C6 isoform X1 [Gallus gallus]
100134845	550	774	366	-1.06866	3.18071e-33	Down	1.28377e-33	CKS1B	NA	GO:0016301//kinase activity;GO:0016538//cyclin-dependent protein serine/threonine kinase regulator activity	GO:0045859//regulation of protein kinase activity;GO:0051301//cell division;GO:0007049//cell cycle	K02219//cyclin-dependent kinase regulatory subunit CKS1	gi|163914386|ref|NP_001106277.1|//cyclin-dependent kinases regulatory subunit 1 [Gallus gallus]
771865	3159	192	24	-2.98817	3.91187e-33	Down	1.5796e-33	HOXB9	GO:0005634//nucleus	GO:0043565//sequence-specific DNA binding	GO:0006355//regulation of transcription, DNA-templated	K09294//homeobox protein HoxA/B/C/D9	gi|971435044|ref|XP_015154931.1|//PREDICTED: homeobox protein Hox-B9 isoform X1 [Gallus gallus];gi|529433658|ref|XP_005236613.1|//PREDICTED: homeobox protein Hox-B9 [Falco peregrinus]
107049250	1670	421.8	140.95	-1.56955	7.53851e-33	Down	3.05805e-33	LOC107049250	NA	NA	NA	K04667//inhibin, beta	gi|971446087|ref|XP_015128069.1|//PREDICTED: inhibin beta C chain-like [Gallus gallus]
427076	9541	601.04	252	-1.24221	7.65247e-33	Down	3.1057e-33	TMEM200A	NA	NA	NA	NA	gi|118088541|ref|XP_424670.2|//PREDICTED: transmembrane protein 200A [Gallus gallus]
107055935	958	698.58	317.45	-1.12607	1.1482e-32	Down	4.6855e-33	LOC107055935	NA	NA	NA	K07375//tubulin beta	gi|971441981|ref|XP_015156504.1|//PREDICTED: tubulin beta chain-like [Gallus gallus]
101748617	2266	334.27	92.67	-1.83901	1.44218e-32	Down	5.90125e-33	LOC101748617	NA	NA	NA	K05767//Ras GTPase-activating-like protein IQGAP2/3	gi|971450667|ref|XP_015129994.1|//PREDICTED: ras GTPase-activating-like protein IQGAP3 [Gallus gallus]
107055962	1006	397.29	801.86	1.02499	1.8882e-32	Up	7.74392e-33	LOC107055962	NA	GO:0008270//zinc ion binding;GO:0003700//transcription factor activity, sequence-specific DNA binding;GO:0008134//transcription factor binding;GO:0003676//nucleic acid binding;GO:0051219//phosphoprotein binding	GO:0006355//regulation of transcription, DNA-templated;GO:0014029//neural crest formation	K05706//snail 2	gi|971442028|ref|XP_015156522.1|//PREDICTED: zinc finger protein SNAI2-like [Gallus gallus]
428333	2056	213	34	-2.63542	2.3796e-32	Down	9.78137e-33	CREB3L3	NA	NA	NA	K09048//cyclic AMP-responsive element-binding protein 3	gi|971436344|ref|XP_015155497.1|//PREDICTED: cyclic AMP-responsive element-binding protein 3-like protein 3 isoform X2 [Gallus gallus];gi|971436342|ref|XP_004948873.2|//PREDICTED: cyclic AMP-responsive element-binding protein 3-like protein 3 isoform X1 [Gallus gallus]
416163	3228	316	84	-1.89963	3.46447e-32	Down	1.42794e-32	HMMR	NA	NA	NA	K06267//hyaluronan-mediated motility receptor	gi|971417574|ref|XP_015149153.1|//PREDICTED: hyaluronan mediated motility receptor isoform X2 [Gallus gallus];gi|971417572|ref|XP_015149152.1|//PREDICTED: hyaluronan mediated motility receptor isoform X1 [Gallus gallus];gi|971417576|ref|XP_015149154.1|//PREDICTED: hyaluronan mediated motility receptor isoform X3 [Gallus gallus]
395135	2081	360	108	-1.72514	3.95541e-32	Down	1.63103e-32	NUF2	GO:0016020//membrane;GO:0005634//nucleus;GO:0005815//microtubule organizing center;GO:0000777//condensed chromosome kinetochore;GO:0005737//cytoplasm;GO:0031262//Ndc80 complex	GO:0005515//protein binding	GO:0051301//cell division	K11548//kinetochore protein Nuf2	gi|54020706|ref|NP_989809.2|//kinetochore protein Nuf2 [Gallus gallus]
772218	3590	218	535	1.30704	5.94477e-32	Up	2.46129e-32	LOC772218	NA	NA	NA	K14360//organic solute transporter subunit alpha	gi|513163384|ref|XP_001235386.2|//PREDICTED: organic solute transporter subunit alpha-like [Gallus gallus]
428980	3496	407	811	1.0065	7.02621e-32	Up	2.91557e-32	ADRA2A	NA	NA	NA	K04138//adrenergic receptor alpha-2A	gi|971403606|ref|XP_004942333.2|//PREDICTED: alpha-2A adrenergic receptor [Gallus gallus]
431205	3113	98.64	337.09	1.78472	8.1202e-32	Up	3.37406e-32	LOC431205	NA	NA	NA	NA	gi|971427234|ref|XP_015151781.1|//PREDICTED: protein MANBAL-like isoform X2 [Gallus gallus];gi|971427232|ref|XP_015151780.1|//PREDICTED: uncharacterized protein LOC431205 isoform X1 [Gallus gallus]
776202	1736	739.09	351.91	-1.05871	2.44297e-31	Down	1.02372e-31	LOC776202	NA	NA	NA	K14377//osteoclast-associated immunoglobulin-like receptor;K06264//platelet glycoprotein VI	gi|971450585|ref|XP_015129957.1|//PREDICTED: LOW QUALITY PROTEIN: platelet glycoprotein VI-like, partial [Gallus gallus]
101750341	3246	354.58	732.64	1.05882	2.50962e-31	Up	1.05212e-31	LOC101750341	NA	NA	NA	NA	gi|971382164|ref|XP_015131416.1|//PREDICTED: golgin subfamily A member 6-like protein 22 [Gallus gallus];gi|971382170|ref|XP_015131418.1|//PREDICTED: golgin subfamily A member 6-like protein 22 isoform X2 [Gallus gallus]
422003	1317	378	121	-1.63155	3.23552e-31	Down	1.35945e-31	PBK	GO:0005634//nucleus	GO:0004674//protein serine/threonine kinase activity;GO:0005524//ATP binding	GO:0034644//cellular response to UV;GO:0032435//negative regulation of proteasomal ubiquitin-dependent protein catabolic process;GO:0050728//negative regulation of inflammatory response;GO:0032873//negative regulation of stress-activated MAPK cascade	K08865//PDZ-binding kinase [EC:2.7.12.2]	gi|487439701|ref|NP_001264928.1|//lymphokine-activated killer T-cell-originated protein kinase [Gallus gallus]
100859258	1943	5.74	132.49	4.54052	3.5434e-31	Up	1.49079e-31	LOC100859258	NA	NA	NA	NA	gi|971395435|ref|XP_004937429.2|//PREDICTED: uncharacterized protein LOC100859258 [Gallus gallus]
428231	2141	238	560	1.2463	4.23212e-31	Up	1.78291e-31	MYCL	NA	NA	NA	K09110//L-myc proto-oncogene protein	gi|363742408|ref|XP_425790.2|//PREDICTED: protein L-Myc [Gallus gallus]
420896	2118	195	493	1.34994	5.39442e-31	Up	2.27758e-31	SERPINB2	NA	NA	NA	K19821//plasminogen activator inhibitor 2	gi|50734136|ref|XP_418982.1|//PREDICTED: serpin B10 [Gallus gallus]
107055200	2311	0	143.1	8.17271	5.42395e-31	Up	2.29106e-31	LOC107055200	NA	NA	NA	NA	gi|971375132|ref|XP_015154567.1|//PREDICTED: uncharacterized protein LOC107055200 [Gallus gallus]
422409	2406	397.69	133.5	-1.56297	6.97277e-31	Down	2.95435e-31	TDO2	NA	NA	NA	K00453//tryptophan 2,3-dioxygenase [EC:1.13.11.11]	gi|971392718|ref|XP_015140830.1|//PREDICTED: tryptophan 2,3-dioxygenase isoform X2 [Gallus gallus];gi|513181791|ref|XP_420377.3|//PREDICTED: tryptophan 2,3-dioxygenase isoform X1 [Gallus gallus]
769263	1785	26	185	2.84277	9.31425e-31	Up	3.95336e-31	CHST8	NA	NA	NA	K09672//carbohydrate 4-sulfotransferase 8 [EC:2.8.2.-]	gi|971414594|ref|XP_015147959.1|//PREDICTED: carbohydrate sulfotransferase 8 [Gallus gallus]
395711	1476	215	38	-2.48844	1.02078e-30	Down	4.3364e-31	HOXC8	GO:0005634//nucleus	GO:0043565//sequence-specific DNA binding;GO:0003700//transcription factor activity, sequence-specific DNA binding	GO:0006355//regulation of transcription, DNA-templated;GO:0007275//multicellular organism development	K09308//homeobox protein HoxB/C/D8	gi|45382451|ref|NP_990224.1|//homeobox protein Hox-C8 [Gallus gallus]
374095	2193	166.83	446.2	1.43114	1.13703e-30	Up	4.83237e-31	ENTPD8	GO:0016021//integral component of membrane;GO:0005886//plasma membrane	GO:0046872//metal ion binding;GO:0005524//ATP binding;GO:0016787//hydrolase activity	NA	K01510//apyrase [EC:3.6.1.5]	gi|971422535|ref|XP_015134740.1|//PREDICTED: ectonucleoside triphosphate diphosphohydrolase 8 isoform X1 [Gallus gallus];gi|971422541|ref|XP_015134743.1|//PREDICTED: ectonucleoside triphosphate diphosphohydrolase 8 isoform X2 [Gallus gallus];gi|971422543|ref|XP_015134744.1|//PREDICTED: ectonucleoside triphosphate diphosphohydrolase 8 isoform X3 [Gallus gallus];gi|732170483|ref|NP_989578.2|//ecton…
423846	4210	414	144	-1.51173	1.25319e-30	Down	5.33538e-31	ARHGAP19	NA	GO:0005096//GTPase activator activity	GO:0007165//signal transduction;GO:0043547//positive regulation of GTPase activity	K20640//Rho GTPase-activating protein 19	gi|61098354|ref|NP_001012927.1|//rho GTPase-activating protein 19 [Gallus gallus];gi|971402721|ref|XP_015144119.1|//PREDICTED: rho GTPase-activating protein 19 isoform X2 [Gallus gallus];gi|971402719|ref|XP_015144118.1|//PREDICTED: rho GTPase-activating protein 19 isoform X1 [Gallus gallus]
408027	1705	158	15	-3.38506	1.27734e-30	Down	5.44058e-31	IGFBP1	GO:0005615//extracellular space	GO:0031994//insulin-like growth factor I binding;GO:0031995//insulin-like growth factor II binding	GO:0001558//regulation of cell growth;GO:0043567//regulation of insulin-like growth factor receptor signaling pathway	K10138//insulin-like growth factor-binding protein 3	gi|47604926|ref|NP_001001294.1|//insulin-like growth factor-binding protein 1 precursor [Gallus gallus]
395450	1597	427.43	152.86	-1.47165	2.12964e-30	Down	9.09457e-31	NTM	GO:0005886//plasma membrane;GO:0031225//anchored component of membrane	NA	GO:0007155//cell adhesion	K06774//neurotrimin	gi|45382657|ref|NP_990042.1|//protein CEPU-1 precursor [Gallus gallus];gi|971431314|ref|XP_015153439.1|//PREDICTED: protein CEPU-1 isoform X2 [Gallus gallus];gi|971431316|ref|XP_015153440.1|//PREDICTED: protein CEPU-1 isoform X3 [Gallus gallus];gi|971431318|ref|XP_015153441.1|//PREDICTED: protein CEPU-1 isoform X4 [Gallus gallus];gi|971431320|ref|XP_015153442.1|//PREDICTED: protein CEPU-1 isoform…
418851	1374	173	21	-3.03048	2.13947e-30	Down	9.14049e-31	CPB2	NA	NA	NA	K01300//carboxypeptidase B2 [EC:3.4.17.20]	gi|513165326|ref|XP_417046.4|//PREDICTED: carboxypeptidase B2 [Gallus gallus]
421560	1202	264	62	-2.07837	2.38676e-30	Down	1.02015e-30	LOC421560	NA	NA	NA	K01025//null	gi|118088279|ref|XP_419601.2|//PREDICTED: sulfotransferase 6B1 [Gallus gallus]
107049467	3109	230.67	46.01	-2.31398	2.69588e-30	Down	1.15403e-30	LOC107049467	NA	NA	NA	K06712//butyrophilin;K13912//deleted in malignant brain tumors 1 protein	gi|971447162|ref|XP_015128555.1|//PREDICTED: uncharacterized protein LOC107049467 isoform X1 [Gallus gallus];gi|971447166|ref|XP_015128557.1|//PREDICTED: uncharacterized protein LOC107049467 isoform X3 [Gallus gallus];gi|971447168|ref|XP_015128558.1|//PREDICTED: uncharacterized protein LOC107049467 isoform X4 [Gallus gallus];gi|971447164|ref|XP_015128556.1|//PREDICTED: uncharacterized protein LOC…
420952	10037	674	313	-1.09476	3.09148e-30	Down	1.32538e-30	FHOD3	NA	NA	NA	K05745//diaphanous 3;K02184//formin 2	gi|971383003|ref|XP_015137844.1|//PREDICTED: FH1/FH2 domain-containing protein 3 isoform X6 [Gallus gallus];gi|971382995|ref|XP_015137840.1|//PREDICTED: FH1/FH2 domain-containing protein 3 isoform X2 [Gallus gallus];gi|971382997|ref|XP_015137841.1|//PREDICTED: FH1/FH2 domain-containing protein 3 isoform X3 [Gallus gallus];gi|971383001|ref|XP_015137843.1|//PREDICTED: FH1/FH2 domain-containing prot…
101749230	3975	736	357	-1.03195	5.36402e-30	Down	2.31264e-30	LOC101749230	NA	NA	NA	NA	gi|513188872|ref|XP_004941963.1|//PREDICTED: uncharacterized protein C14orf132 homolog [Gallus gallus]
424041	1617	166	19	-3.11528	5.93381e-30	Down	2.5605e-30	KMO	NA	NA	NA	K00486//kynurenine 3-monooxygenase [EC:1.14.13.9]	gi|513193295|ref|XP_004942624.1|//PREDICTED: kynurenine 3-monooxygenase isoform X3 [Gallus gallus];gi|971404196|ref|XP_015144694.1|//PREDICTED: kynurenine 3-monooxygenase isoform X4 [Gallus gallus];gi|50750161|ref|XP_421897.1|//PREDICTED: kynurenine 3-monooxygenase isoform X2 [Gallus gallus];gi|513193290|ref|XP_004942623.1|//PREDICTED: kynurenine 3-monooxygenase isoform X1 [Gallus gallus]
427406	1817	231	47	-2.28533	6.56274e-30	Down	2.83555e-30	CCL19	NA	NA	NA	K05512//C-C motif chemokine 19	gi|694016492|ref|NP_001289097.1|//C-C motif chemokine 19 precursor [Gallus gallus]
423680	4105	160	17	-3.22264	8.92513e-30	Down	3.86456e-30	A1CF	NA	NA	NA	K13161//heterogeneous nuclear ribonucleoprotein R;K13160//heterogeneous nuclear ribonucleoprotein Q;K11972//E3 ubiquitin-protein ligase RNF19A [EC:2.3.2.27]	gi|971401478|ref|XP_015134191.1|//PREDICTED: APOBEC1 complementation factor isoform X3 [Gallus gallus];gi|363735090|ref|XP_003641506.1|//PREDICTED: APOBEC1 complementation factor isoform X2 [Gallus gallus];gi|363735088|ref|XP_421561.3|//PREDICTED: APOBEC1 complementation factor isoform X1 [Gallus gallus]
100857332	3481	682	321	-1.07537	9.53136e-30	Down	4.13238e-30	DOK2	NA	NA	NA	K20234//docking protein 2	gi|971430112|ref|XP_003642597.3|//PREDICTED: docking protein 2 isoform X1 [Gallus gallus];gi|513220525|ref|XP_004947630.1|//PREDICTED: docking protein 2 isoform X3 [Gallus gallus];gi|971430114|ref|XP_015152926.1|//PREDICTED: docking protein 2 isoform X2 [Gallus gallus]
395207	3126	259	61	-2.07424	9.8574e-30	Down	4.2774e-30	CENPI	GO:0005634//nucleus;GO:0000776//kinetochore;GO:0005737//cytoplasm	NA	GO:0034508//centromere complex assembly	K11501//centromere protein I	gi|45383115|ref|NP_989863.1|//centromere protein I [Gallus gallus]
107057311	757	0	135.52	8.09419	1.17941e-29	Up	5.12436e-30	LOC107057311	NA	NA	NA	NA	gi|971445050|ref|XP_015157839.1|//PREDICTED: protein MANBAL-like [Gallus gallus]
415400	1414	725	352	-1.03058	1.64189e-29	Down	7.15822e-30	CCNB2	GO:0016020//membrane;GO:0005634//nucleus;GO:0005813//centrosome	NA	GO:0043029//T cell homeostasis;GO:0060317//cardiac epithelial to mesenchymal transition;GO:0051301//cell division;GO:0048538//thymus development;GO:0040007//growth	K10635//E3 ubiquitin-protein ligase Arkadia [EC:2.3.2.27];K05868//cyclin B	gi|971412169|ref|XP_015134378.1|//PREDICTED: G2/mitotic-specific cyclin-B2 isoform X1 [Gallus gallus];gi|52138633|ref|NP_001004369.1|//G2/mitotic-specific cyclin-B2 [Gallus gallus]
107055387	609	468.68	181.64	-1.35569	1.69944e-29	Down	7.41545e-30	LOC107055387	NA	NA	NA	K07980//killer cell immunoglobulin-like receptor 3DL;K14377//osteoclast-associated immunoglobulin-like receptor;K06264//platelet glycoprotein VI;K06512//leukocyte immunoglobulin-like receptor	gi|971436815|ref|XP_015155695.1|//PREDICTED: natural cytotoxicity triggering receptor 1-like, partial [Gallus gallus]
770442	3846	208	503	1.2858	2.02739e-29	Up	8.86905e-30	SUSD4	NA	NA	NA	K04011//complement component (3b/4b) receptor 1	gi|971387453|ref|XP_015139422.1|//PREDICTED: sushi domain-containing protein 4 [Gallus gallus]
107054467	3795	261.42	581.95	1.16636	3.33706e-29	Up	1.46728e-29	LOC107054467	NA	NA	NA	K16494//protocadherin beta	gi|971417173|ref|XP_015148992.1|//PREDICTED: protocadherin beta-15-like [Gallus gallus]
422302	1827	395	138	-1.50535	4.01275e-29	Down	1.76737e-29	NSDHL	GO:0005783//endoplasmic reticulum;GO:0005811//lipid droplet;GO:0016021//integral component of membrane	GO:0003854//3-beta-hydroxy-delta5-steroid dehydrogenase activity	GO:0006694//steroid biosynthetic process;GO:0008203//cholesterol metabolic process;GO:0007224//smoothened signaling pathway;GO:0055114//oxidation-reduction process	K07748//sterol-4alpha-carboxylate 3-dehydrogenase (decarboxylating) [EC:1.1.1.170]	gi|50745878|ref|XP_420279.1|//PREDICTED: sterol-4-alpha-carboxylate 3-dehydrogenase, decarboxylating [Gallus gallus]
424983	4181	325	98	-1.71776	5.39775e-29	Down	2.38541e-29	ECT2	GO:0005634//nucleus;GO:0032154//cleavage furrow;GO:0097149//centralspindlin complex;GO:0005923//bicellular tight junction;GO:0005737//cytoplasm;GO:0030496//midbody	GO:0017048//Rho GTPase binding;GO:0004871//signal transducer activity;GO:0042803//protein homodimerization activity;GO:0005089//Rho guanyl-nucleotide exchange factor activity;GO:0005096//GTPase activator activity	GO:0000902//cell morphogenesis;GO:0032467//positive regulation of cytokinesis;GO:0090630//activation of GTPase activity;GO:0045666//positive regulation of neuron differentiation;GO:0032147//activation of protein kinase activity;GO:0051260//protein homooligomerization;GO:0043123//positive regulation of I-kappaB kinase/NF-kappaB signaling;GO:0043065//positive regulation of apoptotic process;GO:0071…	K20704//protein ECT2	gi|513199879|ref|XP_004943526.1|//PREDICTED: protein ECT2 isoform X1 [Gallus gallus];gi|971411423|ref|XP_015147193.1|//PREDICTED: protein ECT2 isoform X2 [Gallus gallus]
395483	1650	288	78	-1.87269	6.06058e-29	Down	2.68284e-29	SOX8	GO:0044798//nuclear transcription factor complex;GO:0005737//cytoplasm	GO:0000981//RNA polymerase II transcription factor activity, sequence-specific DNA binding;GO:0000979//RNA polymerase II core promoter sequence-specific DNA binding;GO:0046982//protein heterodimerization activity;GO:0008134//transcription factor binding	GO:0001649//osteoblast differentiation;GO:0046533//negative regulation of photoreceptor cell differentiation;GO:0072197//ureter morphogenesis;GO:0007283//spermatogenesis;GO:0060018//astrocyte fate commitment;GO:0060221//retinal rod cell differentiation;GO:0072289//metanephric nephron tubule formation;GO:0003170//heart valve development;GO:0072034//renal vesicle induction;GO:0045892//negative regu…	K09270//transcription factor SOX7/8/10/18 (SOX group E/F)	gi|45382023|ref|NP_990062.1|//transcription factor SOX-8 [Gallus gallus]
420885	1899	635.24	293.72	-1.10103	7.67614e-29	Down	3.41004e-29	BPHL	NA	NA	NA	K18399//valacyclovir hydrolase [EC:3.1.-.-]	gi|971382462|ref|XP_015131502.1|//PREDICTED: valacyclovir hydrolase isoform X1 [Gallus gallus];gi|971382468|ref|XP_015131504.1|//PREDICTED: valacyclovir hydrolase isoform X3 [Gallus gallus];gi|971382470|ref|XP_015131505.1|//PREDICTED: valacyclovir hydrolase isoform X4 [Gallus gallus];gi|971382466|ref|XP_015131503.1|//PREDICTED: valacyclovir hydrolase isoform X2 [Gallus gallus]
100858798	1117	400	142	-1.48228	7.67614e-29	Down	3.41084e-29	LOC100858798	NA	NA	NA	K10524//nicotinamide/nicotinate riboside kinase [EC:2.7.1.22 2.7.1.173]	gi|971435944|ref|XP_015155322.1|//PREDICTED: nicotinamide riboside kinase 2 [Gallus gallus]
418923	6409	354	115	-1.61029	8.10808e-29	Down	3.60428e-29	MTUS2	NA	NA	NA	K10421//CAP-Gly domain-containing linker protein 1	gi|118085001|ref|XP_417117.2|//PREDICTED: microtubule-associated tumor suppressor candidate 2 [Gallus gallus]
107052763	1487	320	664	1.06494	8.51398e-29	Up	3.78947e-29	LOC107052763	NA	NA	NA	K03096//frequently rearranged in advanced T-cell lymphomas 2	gi|971384632|ref|XP_015138428.1|//PREDICTED: GSK-3-binding protein FRAT2-like [Gallus gallus]
107049114	1217	12.72	142.88	3.50146	8.61697e-29	Up	3.83691e-29	LOC107049114	NA	NA	NA	K06751//major histocompatibility complex, class I	gi|971422388|ref|XP_015150530.1|//PREDICTED: class I histocompatibility antigen, F10 alpha chain-like isoform X1 [Gallus gallus];gi|971422390|ref|XP_015150531.1|//PREDICTED: class I histocompatibility antigen, F10 alpha chain-like isoform X2 [Gallus gallus];gi|971422392|ref|XP_015150533.1|//PREDICTED: class I histocompatibility antigen, F10 alpha chain-like isoform X3 [Gallus gallus]
414891	2182	25	174	2.81092	1.0366e-28	Up	4.62728e-29	SLC24A2	GO:0005887//integral component of plasma membrane	GO:0030955//potassium ion binding;GO:0005509//calcium ion binding;GO:0005262//calcium channel activity;GO:0008273//calcium, potassium:sodium antiporter activity;GO:0015293//symporter activity;GO:0031402//sodium ion binding	GO:0070588//calcium ion transmembrane transport;GO:0006813//potassium ion transport;GO:0035725//sodium ion transmembrane transport;GO:0007601//visual perception;GO:0007612//learning;GO:0060292//long term synaptic depression;GO:0007613//memory;GO:0060291//long-term synaptic potentiation;GO:0050896//response to stimulus;GO:0006874//cellular calcium ion homeostasis	K13750//solute carrier family 24 (sodium/potassium/calcium exchanger), member 2	gi|971438691|ref|XP_015135569.1|//PREDICTED: sodium/potassium/calcium exchanger 2 isoform X1 [Gallus gallus];gi|48994233|ref|NP_001001772.1|//sodium/potassium/calcium exchanger 2 [Gallus gallus];gi|971438697|ref|XP_015135572.1|//PREDICTED: sodium/potassium/calcium exchanger 2 isoform X2 [Gallus gallus]
395418	2969	335	684	1.04167	1.27401e-28	Up	5.69415e-29	ZP1	GO:0031012//extracellular matrix;GO:0030141//secretory granule;GO:0005794//Golgi apparatus	NA	NA	K19926//zona pellucida sperm-binding protein 1	gi|874507216|ref|NP_990014.2|//zona pellucida sperm-binding protein 1 precursor [Gallus gallus];gi|971442976|ref|XP_015156928.1|//PREDICTED: zona pellucida sperm-binding protein 1 isoform X1 [Gallus gallus];gi|971442978|ref|XP_015156929.1|//PREDICTED: zona pellucida sperm-binding protein 1 isoform X2 [Gallus gallus]
427737	1021	360.82	719.11	1.00676	1.84975e-28	Up	8.29837e-29	YF6	GO:0042612//MHC class I protein complex;GO:0016021//integral component of membrane	GO:0042605//peptide antigen binding	GO:0006955//immune response;GO:0002474//antigen processing and presentation of peptide antigen via MHC class I	K06751//major histocompatibility complex, class I	gi|971422370|ref|XP_015150522.1|//PREDICTED: class I histocompatibility antigen, F10 alpha chain isoform X1 [Gallus gallus];gi|971422386|ref|XP_015150529.1|//PREDICTED: class I histocompatibility antigen, F10 alpha chain isoform X4 [Gallus gallus]
423793	6108	287.21	79.37	-1.84361	2.69395e-28	Down	1.21107e-28	LOC423793	NA	NA	NA	K10402//kinesin family member 20	gi|971402177|ref|XP_015143888.1|//PREDICTED: kinesin-like protein KIF20B isoform X1 [Gallus gallus];gi|971402187|ref|XP_015143893.1|//PREDICTED: kinesin-like protein KIF20B isoform X2 [Gallus gallus]
107050717	370	506.39	210.76	-1.25282	2.8308e-28	Down	1.27364e-28	LOC107050717	NA	NA	NA	K19934//calcium-binding protein	gi|971450483|ref|XP_015129915.1|//PREDICTED: calumenin-like [Gallus gallus]
776390	2403	23	167	2.87197	3.41363e-28	Up	1.54032e-28	ACPP	NA	NA	NA	K19283//prostatic aicd phosphatase [EC:3.1.3.2 3.1.3.5]	gi|513169293|ref|XP_004939503.1|//PREDICTED: prostatic acid phosphatase isoform X2 [Gallus gallus];gi|118086124|ref|XP_001235914.1|//PREDICTED: prostatic acid phosphatase isoform X1 [Gallus gallus]
107054460	3845	92.03	305.73	1.74391	3.87809e-28	Up	1.75062e-28	LOC107054460	NA	NA	NA	K16494//protocadherin beta	gi|971417157|ref|XP_015148983.1|//PREDICTED: protocadherin beta-15-like [Gallus gallus]
107052723	4509	352.24	704.15	1.01115	4.33386e-28	Up	1.95958e-28	LOC107052723	NA	NA	NA	K04495//transcription factor SOX17 (SOX group F)	gi|971384059|ref|XP_015138178.1|//PREDICTED: transcription factor SOX-17-like [Gallus gallus]
395534	6009	203.45	486.21	1.26874	6.16092e-28	Up	2.79372e-28	MYH15	GO:0016459//myosin complex	GO:0003779//actin binding;GO:0005524//ATP binding;GO:0003774//motor activity	NA	K17751//myosin heavy chain 6/7	gi|971374330|ref|XP_015151264.1|//PREDICTED: myosin heavy chain, cardiac muscle isoform isoform X1 [Gallus gallus];gi|45382109|ref|NP_990097.1|//myosin heavy chain, cardiac muscle isoform [Gallus gallus]
427398	4890	155	18	-3.09437	6.54616e-28	Down	2.97206e-28	KIF24	GO:0005814//centriole;GO:0005874//microtubule;GO:0043234//protein complex;GO:0016021//integral component of membrane	GO:0005524//ATP binding;GO:0003777//microtubule motor activity;GO:0008017//microtubule binding	GO:0007018//microtubule-based movement;GO:0007019//microtubule depolymerization	K10393//kinesin family member 2/24	gi|363744282|ref|XP_424972.3|//PREDICTED: kinesin-like protein KIF24 [Gallus gallus]
431576	6009	684	333	-1.02664	9.08032e-28	Down	4.1378e-28	ZBTB7C	GO:0005634//nucleus	GO:0046872//metal ion binding;GO:0003676//nucleic acid binding	GO:1903025//regulation of RNA polymerase II regulatory region sequence-specific DNA binding;GO:0045944//positive regulation of transcription from RNA polymerase II promoter;GO:0045600//positive regulation of fat cell differentiation	K10494//zinc finger and BTB domain-containing protein 7	gi|363743986|ref|XP_429131.3|//PREDICTED: zinc finger and BTB domain-containing protein 7C [Gallus gallus]
416075	5017	361	123	-1.54151	1.19573e-27	Down	5.46885e-28	CADPS	NA	NA	NA	K19933//calcium-dependent secretion activator	gi|513205528|ref|XP_004944709.1|//PREDICTED: calcium-dependent secretion activator 1 isoform X1 [Gallus gallus];gi|971416569|ref|XP_015148783.1|//PREDICTED: calcium-dependent secretion activator 1 isoform X6 [Gallus gallus];gi|971416563|ref|XP_015148781.1|//PREDICTED: calcium-dependent secretion activator 1 isoform X2 [Gallus gallus];gi|971416571|ref|XP_015148784.1|//PREDICTED: calcium-dependent …
431666	2918	319.75	99.78	-1.66829	1.83807e-27	Down	8.45108e-28	AGXT2	GO:0005739//mitochondrion	GO:0008453//alanine-glyoxylate transaminase activity;GO:0030170//pyridoxal phosphate binding	GO:0019265//glycine biosynthetic process, by transamination of glyoxylate;GO:0009436//glyoxylate catabolic process;GO:0045429//positive regulation of nitric oxide biosynthetic process;GO:0019481//L-alanine catabolic process, by transamination	K00827//alanine-glyoxylate transaminase / (R)-3-amino-2-methylpropionate-pyruvate transaminase [EC:2.6.1.44 2.6.1.40]	gi|513228840|ref|XP_429219.3|//PREDICTED: alanine--glyoxylate aminotransferase 2, mitochondrial [Gallus gallus]
422137	2339	163	22	-2.87747	2.14897e-27	Down	9.90454e-28	XPNPEP2	NA	NA	NA	K14208//Xaa-Pro aminopeptidase 2 [EC:3.4.11.9]	gi|513180127|ref|XP_420139.4|//PREDICTED: xaa-Pro aminopeptidase 2 [Gallus gallus]
423056	6189	461.02	185.52	-1.30142	2.2798e-27	Down	1.05118e-27	TRIM66	NA	NA	NA	K12032//tripartite motif-containing protein 66	gi|513186341|ref|XP_004941449.1|//PREDICTED: tripartite motif-containing protein 66 isoform X3 [Gallus gallus];gi|971397174|ref|XP_015141969.1|//PREDICTED: tripartite motif-containing protein 66 isoform X1 [Gallus gallus];gi|971397177|ref|XP_015141970.1|//PREDICTED: tripartite motif-containing protein 66 isoform X2 [Gallus gallus]
415771	3503	510.7	218.1	-1.21566	2.93916e-27	Down	1.35848e-27	RHPN2	NA	NA	NA	K18040//tyrosine-protein phosphatase non-receptor type 23 [EC:3.1.3.48];K01770//2-C-methyl-D-erythritol 2,4-cyclodiphosphate synthase [EC:4.6.1.12]	gi|971414618|ref|XP_015147966.1|//PREDICTED: rhophilin-2 isoform X3 [Gallus gallus];gi|971414616|ref|XP_015147965.1|//PREDICTED: rhophilin-2 isoform X2 [Gallus gallus];gi|118096400|ref|XP_414133.2|//PREDICTED: rhophilin-2 isoform X1 [Gallus gallus]
428005	6562	411.39	155.13	-1.3952	3.50408e-27	Down	1.62089e-27	CLCN4	NA	NA	NA	K05012//chloride channel 3/4/5	gi|944214838|gb|KQK81320.1|//hypothetical protein AAES_82246 [Amazona aestiva]
770953	2571	288	83	-1.78306	3.59159e-27	Down	1.66203e-27	DDO	NA	GO:0008445//D-aspartate oxidase activity;GO:0005102//receptor binding;GO:0071949//FAD binding	GO:0019478//D-amino acid catabolic process;GO:0007320//insemination;GO:0042445//hormone metabolic process;GO:0007625//grooming behavior;GO:0055114//oxidation-reduction process;GO:0006533//aspartate catabolic process	K00272//D-aspartate oxidase [EC:1.4.3.1]	gi|971389218|ref|XP_015140058.1|//PREDICTED: D-aspartate oxidase [Gallus gallus]
429786	684	339.6	678.94	1.01128	3.80382e-27	Up	1.76095e-27	CRP	GO:0005576//extracellular region	GO:0046872//metal ion binding	NA	K16143//null	gi|88501727|ref|NP_001034653.1|//C-reactive protein precursor [Gallus gallus]
427746	1911	70.19	260.3	1.90267	4.68173e-27	Up	2.17434e-27	YF5	NA	NA	NA	K06751//major histocompatibility complex, class I	gi|513211586|ref|XP_004945737.1|//PREDICTED: MHC class I antigen YF5 isoform X1 [Gallus gallus]
100858869	1984	1.35	108.88	6.34547	5.38371e-27	Up	2.50337e-27	LOC100858869	NA	NA	NA	NA	gi|971381823|ref|XP_004939226.2|//PREDICTED: uncharacterized protein LOC100858869 [Gallus gallus]
418773	1611	476	197	-1.26094	6.27636e-27	Down	2.92428e-27	GGACT	GO:0070062//extracellular exosome	GO:0003839//gamma-glutamylcyclotransferase activity	GO:0042219//cellular modified amino acid catabolic process	K19761//gamma-glutamylaminecyclotransferase [EC:2.3.2.-]	gi|118084648|ref|XP_001231825.1|//PREDICTED: gamma-glutamylaminecyclotransferase isoform X2 [Gallus gallus];gi|50730609|ref|XP_416969.1|//PREDICTED: gamma-glutamylaminecyclotransferase isoform X1 [Gallus gallus]
100859564	1534	9.85	127.45	3.70549	6.57161e-27	Up	3.06428e-27	LOC100859564	NA	NA	NA	NA	gi|971448891|ref|XP_003643521.3|//PREDICTED: LOW QUALITY PROTEIN: uncharacterized protein LOC100859564 [Gallus gallus]
770344	1564	112.51	4.56	-4.61305	1.12893e-26	Down	5.27878e-27	AGXT	NA	NA	NA	K00830//alanine-glyoxylate transaminase / serine-glyoxylate transaminase / serine-pyruvate transaminase [EC:2.6.1.44 2.6.1.45 2.6.1.51]	gi|513199121|ref|XP_003641783.2|//PREDICTED: serine--pyruvate aminotransferase [Gallus gallus]
419144	2784	274.99	583.4	1.09694	1.13503e-26	Up	5.31146e-27	LOC419144	GO:0016021//integral component of membrane	NA	NA	NA	gi|971427244|ref|XP_015151782.1|//PREDICTED: protein MANBAL [Gallus gallus]
416732	2002	424	165	-1.34977	1.14411e-26	Down	5.35615e-27	LAMP5	NA	NA	NA	K06528//lysosomal-associated membrane protein 1/2	gi|971386368|ref|XP_015139017.1|//PREDICTED: lysosome-associated membrane glycoprotein 5 [Gallus gallus]
770624	2940	107	2	-5.72964	1.39291e-26	Down	6.53648e-27	GRXCR1	NA	NA	NA	K17479//glutaredoxin domain-containing cysteine-rich protein 1	gi|971394787|ref|XP_015140963.1|//PREDICTED: glutaredoxin domain-containing cysteine-rich protein 1 [Gallus gallus]
428221	4979	595.68	278.49	-1.08508	1.51196e-26	Down	7.10357e-27	COL8A2	NA	NA	NA	K19479//collagen, type X, alpha	gi|363742359|ref|XP_425780.3|//PREDICTED: collagen alpha-2(VIII) chain [Gallus gallus]
396007	2473	136	13	-3.37519	1.61413e-26	Down	7.59561e-27	PMEL	GO:0034493//melanosome lumen;GO:0005887//integral component of plasma membrane;GO:0005794//Golgi apparatus;GO:0032585//multivesicular body membrane;GO:0005789//endoplasmic reticulum membrane	NA	GO:0048066//developmental pigmentation;GO:0032438//melanosome organization	K17304//melanocyte protein PMEL	gi|55925599|ref|NP_990443.2|//melanocyte protein PMEL precursor [Gallus gallus]
373988	2239	133	12	-3.45849	1.85227e-26	Down	8.73687e-27	TBX5	GO:0005884//actin filament;GO:0001725//stress fiber;GO:0005634//nucleus;GO:0005737//cytoplasm	GO:0097110//scaffold protein binding;GO:0001228//transcriptional activator activity, RNA polymerase II transcription regulatory region sequence-specific binding;GO:0030274//LIM domain binding;GO:0000977//RNA polymerase II regulatory region sequence-specific DNA binding;GO:0051087//chaperone binding;GO:0008134//transcription factor binding	GO:0003197//endocardial cushion development;GO:0030324//lung development;GO:0060044//negative regulation of cardiac muscle cell proliferation;GO:0072513//positive regulation of secondary heart field cardioblast proliferation;GO:0002009//morphogenesis of an epithelium;GO:0051891//positive regulation of cardioblast differentiation;GO:1900117//regulation of execution phase of apoptosis;GO:0007389//p…	K10179//T-box protein 5	gi|971421881|ref|XP_015150316.1|//PREDICTED: T-box transcription factor TBX5 isoform X1 [Gallus gallus];gi|971421883|ref|XP_015150317.1|//PREDICTED: T-box transcription factor TBX5 isoform X2 [Gallus gallus]
396051	1878	111.03	4.43	-4.63567	2.15404e-26	Down	1.01723e-26	CYP1A1	GO:0031090//organelle membrane;GO:0016021//integral component of membrane;GO:0005789//endoplasmic reticulum membrane	GO:0020037//heme binding;GO:0005506//iron ion binding;GO:0070330//aromatase activity;GO:0019825//oxygen binding	GO:0046677//response to antibiotic;GO:0070989//oxidative demethylation;GO:0071615//oxidative deethylation;GO:0043385//mycotoxin metabolic process;GO:0017144//drug metabolic process	K07408//cytochrome P450 family 1 subfamily A polypeptide 1 [EC:1.14.14.1]	gi|45384068|ref|NP_990477.1|//cytochrome P450 1A5 [Gallus gallus];gi|971411925|ref|XP_015134247.1|//PREDICTED: cytochrome P450 1A5 isoform X1 [Gallus gallus]
427207	3622	225	508	1.18673	2.2734e-26	Up	1.07486e-26	GCNT4	GO:0016020//membrane	GO:0008375//acetylglucosaminyltransferase activity	GO:0048872//homeostasis of number of cells;GO:0002121//inter-male aggressive behavior;GO:0048729//tissue morphogenesis;GO:0060993//kidney morphogenesis;GO:0042403//thyroid hormone metabolic process	K09663//beta-1,6-N-acetylglucosaminyltransferase 4 [EC:2.4.1.-]	gi|363744253|ref|XP_003643009.1|//PREDICTED: beta-1,3-galactosyl-O-glycosyl-glycoprotein beta-1,6-N-acetylglucosaminyltransferase 4 [Gallus gallus]
425035	10171	629.7	302.89	-1.04404	2.29819e-26	Down	1.08702e-26	IGSF10	NA	NA	NA	K17341//hemicentin	gi|971411744|ref|XP_422837.5|//PREDICTED: immunoglobulin superfamily member 10 [Gallus gallus]
424384	2367	252	66	-1.92106	2.32537e-26	Down	1.10074e-26	TNFSF4	NA	NA	NA	K05469//tumor necrosis factor ligand superfamily member 4	gi|363736485|ref|XP_430147.2|//PREDICTED: tumor necrosis factor ligand superfamily member 4 [Gallus gallus]
395641	973	335	113	-1.55601	4.17829e-26	Down	1.9856e-26	HSD17B1	GO:0005654//nucleoplasm;GO:0031965//nuclear membrane;GO:0005737//cytoplasm	GO:0004303//estradiol 17-beta-dehydrogenase activity	GO:0006703//estrogen biosynthetic process;GO:0055114//oxidation-reduction process	K00044//17beta-estradiol 17-dehydrogenase [EC:1.1.1.62];K01205//alpha-N-acetylglucosaminidase [EC:3.2.1.50]	gi|45382291|ref|NP_990168.1|//estradiol 17-beta-dehydrogenase 1 [Gallus gallus];gi|971435376|ref|XP_015155079.1|//PREDICTED: estradiol 17-beta-dehydrogenase 1 isoform X1 [Gallus gallus]
100857402	1582	311	100	-1.62508	7.94174e-26	Down	3.79327e-26	LOC100857402	NA	NA	NA	K19831//interferon induced transmembrane protein 1;K06566//interferon induced transmembrane protein	gi|513212600|ref|XP_003642350.2|//PREDICTED: proline-rich transmembrane protein 1 isoform X2 [Gallus gallus];gi|971423662|ref|XP_015135239.1|//PREDICTED: homeobox protein engrailed-1 isoform X1 [Gallus gallus]
395798	8343	396	151	-1.37912	8.571e-26	Down	4.09542e-26	ACAN	GO:0005604//basement membrane	GO:0005201//extracellular matrix structural constituent;GO:0030246//carbohydrate binding;GO:0005509//calcium ion binding;GO:0005540//hyaluronic acid binding	GO:0030166//proteoglycan biosynthetic process;GO:0007155//cell adhesion;GO:0007507//heart development;GO:0001502//cartilage condensation;GO:0002063//chondrocyte development;GO:0030199//collagen fibril organization;GO:0007417//central nervous system development	K06792//aggrecan 1	gi|971412952|ref|XP_015147465.1|//PREDICTED: aggrecan core protein isoform X2 [Gallus gallus];gi|372266122|ref|NP_990286.2|//aggrecan core protein precursor [Gallus gallus]
107053871	1605	305.89	97.19	-1.6423	8.61097e-26	Down	4.11772e-26	C1QL2	NA	NA	NA	K07296//adiponectin;K03986//complement C1q subcomponent subunit A;K03987//complement C1q subcomponent subunit B	gi|971406162|ref|XP_015145430.1|//PREDICTED: complement C1q-like protein 2 isoform X1 [Gallus gallus]
100859881	1865	272.69	79.17	-1.77241	1.30817e-25	Down	6.27507e-26	LOC100859881	NA	NA	NA	K06751//major histocompatibility complex, class I	gi|971444456|ref|XP_015157572.1|//PREDICTED: LOW QUALITY PROTEIN: class I histocompatibility antigen, F10 alpha chain-like [Gallus gallus]
418311	2823	121	9	-3.73711	1.42193e-25	Down	6.8287e-26	HAO2	NA	NA	NA	K11517//(S)-2-hydroxy-acid oxidase [EC:1.1.3.15]	gi|971374002|ref|XP_015149867.1|//PREDICTED: hydroxyacid oxidase 2 isoform X1 [Gallus gallus];gi|971374004|ref|XP_015149876.1|//PREDICTED: hydroxyacid oxidase 2 isoform X2 [Gallus gallus]
107056090	1030	102.79	1.57	-6.02096	1.48269e-25	Down	7.12323e-26	LOC107056090	NA	NA	NA	K05637//laminin, alpha 1/2	gi|971442246|ref|XP_015156615.1|//PREDICTED: laminin subunit alpha-2-like [Gallus gallus]
427915	2661	174	30	-2.52422	1.51403e-25	Down	7.27663e-26	SPIC	NA	NA	NA	K09440//transcription factor Spi-C	gi|513159732|ref|XP_004937899.1|//PREDICTED: transcription factor Spi-C [Gallus gallus]
416865	7479	378.74	141.73	-1.40623	1.97258e-25	Down	9.49147e-26	KNTC1	NA	NA	NA	K11577//kinetochore-associated protein 1	gi|971421532|ref|XP_015131064.1|//PREDICTED: kinetochore-associated protein 1 isoform X2 [Gallus gallus];gi|513210172|ref|XP_415157.4|//PREDICTED: kinetochore-associated protein 1 isoform X1 [Gallus gallus]
107049691	1063	228.97	505.89	1.1555	3.08403e-25	Up	1.4937e-25	LOC107049691	NA	NA	NA	NA	gi|971448041|ref|XP_015128923.1|//PREDICTED: dapper homolog 3-like [Gallus gallus]
772339	3119	108	5	-4.42113	3.15917e-25	Down	1.53068e-25	SERPINA3	GO:0005615//extracellular space	GO:0004867//serine-type endopeptidase inhibitor activity	GO:0010951//negative regulation of endopeptidase activity	K04525//serpin peptidase inhibitor, clade A	gi|971400187|ref|XP_015143259.1|//PREDICTED: alpha-1-antiproteinase [Gallus gallus]
427721	12181	463.54	196.49	-1.22641	3.27093e-25	Down	1.58543e-25	NOS1	GO:0005856//cytoskeleton;GO:0030315//T-tubule;GO:0005901//caveola;GO:0030018//Z disc;GO:0005739//mitochondrion;GO:0033017//sarcoplasmic reticulum membrane;GO:0045202//synapse	GO:0050661//NADP binding;GO:0020037//heme binding;GO:0005506//iron ion binding;GO:0010181//FMN binding;GO:0050660//flavin adenine dinucleotide binding;GO:0004517//nitric-oxide synthase activity;GO:0005516//calmodulin binding	GO:0043267//negative regulation of potassium ion transport;GO:0002028//regulation of sodium ion transport;GO:0007263//nitric oxide mediated signal transduction;GO:0051926//negative regulation of calcium ion transport;GO:0055114//oxidation-reduction process;GO:0045776//negative regulation of blood pressure;GO:0051612//negative regulation of serotonin uptake;GO:0006941//striated muscle contraction;…	K13240//nitric-oxide synthase, brain [EC:1.14.13.39]	gi|971421990|ref|XP_004934537.2|//PREDICTED: nitric oxide synthase, brain isoform X1 [Gallus gallus];gi|971421996|ref|XP_015150361.1|//PREDICTED: nitric oxide synthase, brain isoform X2 [Gallus gallus]
100857637	2953	445.99	185.14	-1.25656	3.35287e-25	Down	1.6264e-25	LOC100857637	NA	NA	NA	K04497//groucho	gi|971435709|ref|XP_015155227.1|//PREDICTED: transducin-like enhancer protein 1 isoform X1 [Gallus gallus];gi|971435713|ref|XP_015155229.1|//PREDICTED: transducin-like enhancer protein 1 isoform X2 [Gallus gallus]
378789	2914	104	310	1.58751	3.87034e-25	Up	1.88101e-25	SLC15A1	GO:0005903//brush border;GO:0016021//integral component of membrane	GO:0005427//proton-dependent oligopeptide secondary active transmembrane transporter activity	GO:0035672//oligopeptide transmembrane transport	K14206//solute carrier family 15 (oligopeptide transporter), member 1	gi|45383430|ref|NP_989696.1|//solute carrier family 15 member 1 [Gallus gallus]
424435	5881	27	163	2.60567	4.97826e-25	Up	2.42595e-25	TNN	GO:0009986//cell surface;GO:0005578//proteinaceous extracellular matrix	GO:0005178//integrin binding;GO:0042802//identical protein binding	GO:0007160//cell-matrix adhesion;GO:0016477//cell migration;GO:0016049//cell growth;GO:0007409//axonogenesis	K06252//tenascin	gi|971407614|ref|XP_015146012.1|//PREDICTED: tenascin-N [Gallus gallus]
776042	4596	239.67	63.31	-1.90871	6.0679e-25	Down	2.96145e-25	LOC776042	NA	NA	NA	K16494//protocadherin beta	gi|971447676|ref|XP_001235607.3|//PREDICTED: protocadherin beta-4-like [Gallus gallus]
418659	7366	175	32	-2.43938	9.19595e-25	Down	4.51034e-25	ARSE	GO:0016021//integral component of membrane	GO:0008484//sulfuric ester hydrolase activity	GO:0008152//metabolic process	K12374//arylsulfatase D/F/H [EC:3.1.6.-]	gi|513163925|ref|XP_004938494.1|//PREDICTED: arylsulfatase H isoform X1 [Gallus gallus];gi|513163928|ref|XP_416856.4|//PREDICTED: arylsulfatase H isoform X2 [Gallus gallus]
422709	2957	109	6	-4.17139	9.54135e-25	Down	4.6833e-25	MTTP	NA	NA	NA	K14463//microsomal triglyceride transfer protein large subunit	gi|766944236|ref|NP_001103254.2|//microsomal triglyceride transfer protein large subunit precursor [Gallus gallus]
107052833	1777	211.98	49.68	-2.08136	1.00409e-24	Down	4.93222e-25	LOC107052833	NA	NA	NA	K19827//microtuble-actin crosslinking factor 1	gi|971385476|ref|XP_015138773.1|//PREDICTED: microtubule-actin cross-linking factor 1-like [Gallus gallus]
100858173	3886	190	444	1.23639	1.07401e-24	Up	5.28169e-25	ALPK1	NA	GO:0004674//protein serine/threonine kinase activity;GO:0005524//ATP binding	GO:0098779//positive regulation of mitophagy in response to mitochondrial depolarization;GO:0098792//xenophagy;GO:0006468//protein phosphorylation;GO:0002230//positive regulation of defense response to virus by host	K08868//alpha-kinase	gi|513183683|ref|XP_004936006.1|//PREDICTED: alpha-protein kinase 1 isoform X1 [Gallus gallus];gi|513183689|ref|XP_004936007.1|//PREDICTED: alpha-protein kinase 1 isoform X2 [Gallus gallus]
101752263	1499	0	108.17	7.76899	1.08855e-24	Up	5.35724e-25	LOC101752263	NA	NA	NA	NA	gi|971383252|ref|XP_015137935.1|//PREDICTED: uncharacterized protein LOC101752263 [Gallus gallus]
418705	8138	311	104	-1.5685	1.29085e-24	Down	6.36965e-25	AFF3	NA	NA	NA	K15195//AF4/FMR2 family member 3	gi|971376692|ref|XP_015133280.1|//PREDICTED: AF4/FMR2 family member 3 isoform X3 [Gallus gallus];gi|971376694|ref|XP_015133281.1|//PREDICTED: AF4/FMR2 family member 3 isoform X4 [Gallus gallus];gi|971376690|ref|XP_015133278.1|//PREDICTED: AF4/FMR2 family member 3 isoform X2 [Gallus gallus];gi|971376696|ref|XP_015133282.1|//PREDICTED: AF4/FMR2 family member 3 isoform X5 [Gallus gallus];gi|97137668…
107050100	801	98.44	1.92	-5.66824	1.41189e-24	Down	6.97478e-25	LOC107050100	NA	NA	NA	K14377//osteoclast-associated immunoglobulin-like receptor;K06264//platelet glycoprotein VI;K06512//leukocyte immunoglobulin-like receptor	gi|971449180|ref|XP_015129377.1|//PREDICTED: platelet glycoprotein VI-like, partial [Gallus gallus]
422763	2700	7	110	3.98583	1.5662e-24	Up	7.74295e-25	CWH43	GO:0016021//integral component of membrane	NA	NA	NA	gi|513184183|ref|XP_004936096.1|//PREDICTED: PGAP2-interacting protein isoform X2 [Gallus gallus];gi|363733723|ref|XP_420716.3|//PREDICTED: PGAP2-interacting protein isoform X1 [Gallus gallus];gi|513184186|ref|XP_004936097.1|//PREDICTED: PGAP2-interacting protein isoform X3 [Gallus gallus]
427160	8068	402	160	-1.31729	1.71494e-24	Down	8.48465e-25	ADAMTS6	NA	NA	NA	K08621//a disintegrin and metalloproteinase with thrombospondin motifs 6 [EC:3.4.24.-]	gi|513229357|ref|XP_424749.4|//PREDICTED: A disintegrin and metalloproteinase with thrombospondin motifs 6 [Gallus gallus]
423079	568	124	339	1.46278	2.02331e-24	Up	1.00404e-24	HPS5	GO:0034364//high-density lipoprotein particle	NA	GO:0006953//acute-phase response	K20191//Hermansky-Pudlak syndrome 5 protein;K17310//serum amyloid A protein	gi|971397528|ref|XP_015142148.1|//PREDICTED: serum amyloid A protein [Gallus gallus]
415661	1026	368.46	139.36	-1.39086	2.10612e-24	Down	1.04592e-24	LOC415661	NA	NA	NA	K13368//17beta-estradiol 17-dehydrogenase / 3alpha(17beta)-hydroxysteroid dehydrogenase (NAD+) [EC:1.1.1.62 1.1.1.239];K08802//SNF related kinase [EC:2.7.11.1];K20128//metastasis suppressor protein 1	gi|50753535|ref|XP_414028.1|//PREDICTED: C-factor [Gallus gallus]
395406	4821	330	116	-1.49651	2.15307e-24	Down	1.07003e-24	TENM4	NA	NA	NA	NA	gi|971378742|ref|XP_015136335.1|//PREDICTED: LOW QUALITY PROTEIN: teneurin-4 [Gallus gallus]
373895	2618	140	18	-2.94753	2.75392e-24	Down	1.37099e-24	TBX22	GO:0005634//nucleus	GO:0003677//DNA binding;GO:0003700//transcription factor activity, sequence-specific DNA binding	GO:0000122//negative regulation of transcription from RNA polymerase II promoter	K10186//T-box protein 22	gi|45383898|ref|NP_989437.1|//T-box transcription factor TBX22 [Gallus gallus]
427806	2927	101	4	-4.64638	3.58703e-24	Down	1.79002e-24	MYADML2	NA	NA	NA	K00286//pyrroline-5-carboxylate reductase [EC:1.5.1.2]	gi|513213538|ref|XP_004946210.1|//PREDICTED: myeloid-associated differentiation marker-like protein 2 [Gallus gallus]
100858730	2890	468	205	-1.17905	5.35848e-24	Down	2.682e-24	CRLF1	NA	NA	NA	K05060//interleukin 6 signal transducer	gi|513227639|ref|XP_003642939.2|//PREDICTED: cytokine receptor-like factor 1 isoform X2 [Gallus gallus];gi|513227636|ref|XP_004948964.1|//PREDICTED: cytokine receptor-like factor 1 isoform X1 [Gallus gallus]
428683	1817	136	17	-2.98817	6.23053e-24	Down	3.12195e-24	FADS6	NA	NA	NA	K12419//fatty acid desaturase 6 [EC:1.14.19.-]	gi|118099955|ref|XP_426241.2|//PREDICTED: fatty acid desaturase 6 [Gallus gallus]
416174	4155	100.15	4.16	-4.57761	7.5789e-24	Down	3.80604e-24	GABRP	GO:0016021//integral component of membrane;GO:0030054//cell junction;GO:0005886//plasma membrane;GO:0045202//synapse	GO:0004890//GABA-A receptor activity;GO:0008068//extracellular-glutamate-gated chloride channel activity	GO:0007165//signal transduction;GO:1902476//chloride transmembrane transport	K05189//gamma-aminobutyric acid receptor subunit pi	gi|513206173|ref|XP_004944832.1|//PREDICTED: gamma-aminobutyric acid receptor subunit pi [Gallus gallus]
424768	1625	127.31	13.91	-3.18232	9.11723e-24	Down	4.58705e-24	CLDN15	NA	NA	NA	K06087//claudin	gi|971410480|ref|XP_422589.2|//PREDICTED: claudin-19 isoform X1 [Gallus gallus];gi|971410482|ref|XP_004937032.2|//PREDICTED: claudin-15 isoform X2 [Gallus gallus]
770943	1369	336	123	-1.43797	1.82614e-23	Down	9.27598e-24	SCTR	GO:0005881//cytoplasmic microtubule;GO:0016021//integral component of membrane	GO:0004930//G-protein coupled receptor activity	GO:0007186//G-protein coupled receptor signaling pathway;GO:0007166//cell surface receptor signaling pathway	K04588//secretin receptor	gi|284009820|ref|NP_001165013.1|//secretin receptor precursor [Gallus gallus]
101751647	1123	68.85	238.49	1.80423	2.68817e-23	Up	1.37297e-23	LOC101751647	NA	NA	NA	K09228//KRAB domain-containing zinc finger protein;K15261//poly [ADP-ribose] polymerase 10/14/15 [EC:2.4.2.30];K09174//regulatory factor X 4	gi|971379568|ref|XP_015136680.1|//PREDICTED: GTPase IMAP family member 7-like isoform X4 [Gallus gallus];gi|513167083|ref|XP_004939094.1|//PREDICTED: GTPase IMAP family member 7-like isoform X1 [Gallus gallus];gi|971379572|ref|XP_015136682.1|//PREDICTED: GTPase IMAP family member 7-like isoform X5 [Gallus gallus];gi|971379566|ref|XP_015136679.1|//PREDICTED: GTPase IMAP family member 7-like isofor…
420928	1203	249	73	-1.75835	2.78189e-23	Down	1.42187e-23	CMBL	NA	GO:0030246//carbohydrate binding	NA	K01061//carboxymethylenebutenolidase [EC:3.1.1.45]	gi|50734923|ref|XP_419013.1|//PREDICTED: carboxymethylenebutenolidase homolog [Gallus gallus]
417960	2118	88	272	1.63986	3.05612e-23	Up	1.56601e-23	GPRC5A	NA	NA	NA	K08468//G protein-coupled receptor family C group 5 member A	gi|513158900|ref|XP_004937734.1|//PREDICTED: retinoic acid-induced protein 3 isoform X2 [Gallus gallus];gi|118082649|ref|XP_416200.2|//PREDICTED: retinoic acid-induced protein 3 isoform X1 [Gallus gallus]
415820	3096	172.65	34.45	-2.31344	4.53839e-23	Down	2.33315e-23	HNF4beta	GO:0005634//nucleus	GO:0003707//steroid hormone receptor activity;GO:0008270//zinc ion binding;GO:0043565//sequence-specific DNA binding;GO:0003700//transcription factor activity, sequence-specific DNA binding	GO:0006355//regulation of transcription, DNA-templated;GO:0043401//steroid hormone mediated signaling pathway	K08542//hepatocyte nuclear factor 4-beta	gi|347800621|ref|NP_001025747.2|//hepatic nuclear factor 4beta [Gallus gallus];gi|971414855|ref|XP_015148041.1|//PREDICTED: hepatic nuclear factor 4beta isoform X1 [Gallus gallus];gi|971414859|ref|XP_015148043.1|//PREDICTED: hepatic nuclear factor 4beta isoform X2 [Gallus gallus]
425103	3430	283.68	93.53	-1.58893	5.43847e-23	Down	2.80296e-23	FAM83D	NA	NA	NA	K16805//protein FAM83D	gi|363741752|ref|XP_422895.3|//PREDICTED: protein FAM83D-B [Gallus gallus]
101748417	3277	137	19.03	-2.836	5.82271e-23	Down	3.0064e-23	LOC101748417	NA	GO:0004674//protein serine/threonine kinase activity;GO:0005524//ATP binding	GO:0006468//protein phosphorylation	K08858//serine/threonine-protein kinase SBK [EC:2.7.11.1]	gi|513233709|ref|XP_004949838.1|//PREDICTED: uncharacterized serine/threonine-protein kinase SBK3-like isoform X2 [Gallus gallus];gi|513233707|ref|XP_004949837.1|//PREDICTED: uncharacterized serine/threonine-protein kinase SBK3-like isoform X1 [Gallus gallus]
107051280	493	0	98.52	7.63417	7.07005e-23	Up	3.66096e-23	LOC107051280	NA	NA	NA	K02738//20S proteasome subunit beta 1 [EC:3.4.25.1]	gi|971451676|ref|XP_015130398.1|//PREDICTED: LOW QUALITY PROTEIN: proteasome subunit beta type-6-like, partial [Gallus gallus]
424169	2362	206	455	1.15505	7.58331e-23	Up	3.93237e-23	DHRS9	GO:0030176//integral component of endoplasmic reticulum membrane	GO:0004022//alcohol dehydrogenase (NAD) activity;GO:0004745//retinol dehydrogenase activity;GO:0047035//testosterone dehydrogenase (NAD+) activity	GO:0042904//9-cis-retinoic acid biosynthetic process;GO:0008209//androgen metabolic process;GO:0042448//progesterone metabolic process;GO:0055114//oxidation-reduction process	K11149//dehydrogenase/reductase SDR family member 9 [EC:1.1.-.-]	gi|513194223|ref|XP_422015.3|//PREDICTED: dehydrogenase/reductase SDR family member 9 isoform X1 [Gallus gallus];gi|513194232|ref|XP_004942818.1|//PREDICTED: dehydrogenase/reductase SDR family member 9 isoform X2 [Gallus gallus]
416740	6083	369.69	146.75	-1.32113	9.52551e-23	Down	4.96431e-23	ISM1	NA	NA	NA	NA	gi|971386336|ref|XP_415036.5|//PREDICTED: isthmin-1 isoform X1 [Gallus gallus];gi|971386340|ref|XP_015139011.1|//PREDICTED: isthmin-1 isoform X2 [Gallus gallus]
107055968	577	190.48	44.02	-2.10158	1.22296e-22	Down	6.40995e-23	LOC107055968	NA	NA	NA	NA	gi|971442041|ref|XP_015156529.1|//PREDICTED: CKLF-like MARVEL transmembrane domain-containing protein 7, partial [Gallus gallus]
429696	3925	1	90	6.50368	1.78577e-22	Up	9.39974e-23	GBP7	NA	NA	NA	K20899//guanylate-binding protein 1/3/4/7	gi|971449445|ref|XP_015129485.1|//PREDICTED: LOW QUALITY PROTEIN: guanylate-binding protein 1 [Gallus gallus]
417998	2932	79	252	1.68533	1.89846e-22	Up	1.00035e-22	CHADL	NA	NA	NA	K06248//chondroadherin	gi|356582462|ref|NP_001239205.1|//chondroadherin-like protein precursor [Gallus gallus]
424786	3467	134.46	19.18	-2.79767	2.80782e-22	Down	1.48943e-22	DNER	NA	NA	NA	K02599//Notch 1	gi|118095057|ref|XP_422604.2|//PREDICTED: delta and Notch-like epidermal growth factor-related receptor [Gallus gallus]
395779	3088	148	25	-2.55377	3.08479e-22	Down	1.63693e-22	COCH	GO:0070062//extracellular exosome;GO:0005578//proteinaceous extracellular matrix	GO:0005518//collagen binding	GO:0007605//sensory perception of sound;GO:0045089//positive regulation of innate immune response;GO:0042742//defense response to bacterium;GO:0008360//regulation of cell shape	K06238//collagen, type VI, alpha	gi|45384390|ref|NP_990268.1|//cochlin precursor [Gallus gallus];gi|971398967|ref|XP_015142770.1|//PREDICTED: cochlin isoform X1 [Gallus gallus]
424916	1285	180	40	-2.15809	3.69982e-22	Down	1.96605e-22	SLC51A	NA	NA	NA	K14360//organic solute transporter subunit alpha	gi|478732994|ref|NP_001264626.1|//organic solute transporter subunit alpha [Gallus gallus]
100859787	10103	230.06	66.17	-1.78593	4.52163e-22	Down	2.40443e-22	AMER3	GO:0005886//plasma membrane	GO:0005546//phosphatidylinositol-4,5-bisphosphate binding;GO:0008013//beta-catenin binding	GO:0060828//regulation of canonical Wnt signaling pathway;GO:0048856//anatomical structure development	K19407//APC membrane recruitment protein 1	gi|513198892|ref|XP_004937028.1|//PREDICTED: APC membrane recruitment protein 3 [Gallus gallus]
424477	3252	508	242	-1.05799	5.13353e-22	Down	2.73554e-22	LPPR5	NA	NA	NA	K19581//lipid phosphate phosphatase-related protein type 1/2/5	gi|971408126|ref|XP_015146229.1|//PREDICTED: lipid phosphate phosphatase-related protein type 5 isoform X3 [Gallus gallus];gi|971408129|ref|XP_015146230.1|//PREDICTED: lipid phosphate phosphatase-related protein type 5 isoform X4 [Gallus gallus];gi|118094289|ref|XP_422320.2|//PREDICTED: lipid phosphate phosphatase-related protein type 5 isoform X1 [Gallus gallus];gi|971408124|ref|XP_015146228.1|/…
422046	2160	444.24	198.82	-1.14805	5.61678e-22	Down	3.00141e-22	CYP2K1L	NA	NA	NA	K17854//cytochrome P450 family 2 subfamily K	gi|118089176|ref|XP_420052.2|//PREDICTED: cytochrome P450 2K4-like [Gallus gallus]
770517	1101	236	70	-1.74153	7.01937e-22	Down	3.7718e-22	CDCA3	NA	NA	NA	NA	gi|495531926|ref|NP_001265065.1|//cell division cycle-associated protein 3 isoform 1 [Gallus gallus];gi|495532213|ref|NP_001265066.1|//cell division cycle-associated protein 3 isoform 2 [Gallus gallus]
416324	6679	329.37	125.17	-1.38399	7.81968e-22	Down	4.20911e-22	ACSL6	GO:0005739//mitochondrion	GO:0004467//long-chain fatty acid-CoA ligase activity	GO:0007405//neuroblast proliferation;GO:0001676//long-chain fatty acid metabolic process	K01897//long-chain acyl-CoA synthetase [EC:6.2.1.3]	gi|971418555|ref|XP_015149563.1|//PREDICTED: long-chain-fatty-acid--CoA ligase 6 isoform X2 [Gallus gallus];gi|971418553|ref|XP_015149562.1|//PREDICTED: long-chain-fatty-acid--CoA ligase 6 isoform X1 [Gallus gallus]
418126	2512	222.19	62.77	-1.81182	9.07606e-22	Down	4.89551e-22	CHRM2	GO:0005887//integral component of plasma membrane;GO:0030054//cell junction;GO:0045211//postsynaptic membrane	GO:0016907//G-protein coupled acetylcholine receptor activity	GO:0007197//adenylate cyclase-inhibiting G-protein coupled acetylcholine receptor signaling pathway;GO:0007271//synaptic transmission, cholinergic;GO:0008016//regulation of heart contraction;GO:0009615//response to virus;GO:0006940//regulation of smooth muscle contraction;GO:0007207//phospholipase C-activating G-protein coupled acetylcholine receptor signaling pathway	K04130//muscarinic acetylcholine receptor M2	gi|71896871|ref|NP_001025936.1|//muscarinic acetylcholine receptor M2 [Gallus gallus]
107049916	4254	29.3	153.18	2.39809	1.21326e-21	Up	6.55544e-22	LOC107049916	NA	NA	NA	K14165//atypical dual specificity phosphatase [EC:3.1.3.16 3.1.3.48];K04257//olfactory receptor	gi|971448724|ref|XP_015129201.1|//PREDICTED: uncharacterized protein LOC107049916 [Gallus gallus]
107051328	1235	244.75	502.02	1.04827	1.22556e-21	Up	6.62422e-22	LOC107051328	NA	NA	NA	K07605//type II keratin, basic;K10477//BTB/POZ domain-containing protein 1/2	gi|971451773|ref|XP_015130439.1|//PREDICTED: E3 ubiquitin-protein ligase Hakai-like isoform X6 [Gallus gallus];gi|971451771|ref|XP_015130438.1|//PREDICTED: uncharacterized protein LOC107051328 isoform X5 [Gallus gallus];gi|971451767|ref|XP_015130436.1|//PREDICTED: uncharacterized protein LOC107051328 isoform X3 [Gallus gallus];gi|971451785|ref|XP_015130445.1|//PREDICTED: dual specificity protein …
415743	1232	216	60	-1.83617	1.44219e-21	Down	7.81655e-22	NETO2	NA	NA	NA	K14616//cubilin	gi|513203290|ref|XP_004944247.1|//PREDICTED: neuropilin and tolloid-like protein 2 isoform X2 [Gallus gallus];gi|971414463|ref|XP_015147906.1|//PREDICTED: neuropilin and tolloid-like protein 2 isoform X4 [Gallus gallus];gi|971414458|ref|XP_004944245.2|//PREDICTED: neuropilin and tolloid-like protein 2 isoform X1 [Gallus gallus];gi|971414461|ref|XP_004944246.2|//PREDICTED: neuropilin and tolloid-l…
417931	5445	375.99	155.83	-1.25889	1.47809e-21	Down	8.01662e-22	GAS2L3	GO:0015630//microtubule cytoskeleton;GO:0015629//actin cytoskeleton	GO:0003779//actin binding;GO:0008017//microtubule binding	GO:0000226//microtubule cytoskeleton organization;GO:0030036//actin cytoskeleton organization;GO:0007050//cell cycle arrest	K10382//dystonin	gi|475504459|ref|NP_001264292.1|//GAS2-like protein 3 [Gallus gallus]
101749246	714	50.9	196.1	1.95768	1.61029e-21	Up	8.74259e-22	LOC101749246	NA	NA	NA	K17751//myosin heavy chain 6/7	gi|971449217|ref|XP_015129390.1|//PREDICTED: myosin-7-like, partial [Gallus gallus]
424172	1334	434	195	-1.14239	2.37367e-21	Down	1.29534e-21	SPC25	NA	NA	NA	K11550//kinetochore protein Spc25, animal type	gi|482513658|ref|NP_001264786.1|//kinetochore protein Spc25 [Gallus gallus]
416728	2349	172	38	-2.16651	2.42814e-21	Down	1.32551e-21	HAO1	NA	NA	NA	K11517//(S)-2-hydroxy-acid oxidase [EC:1.1.3.15]	gi|971386248|ref|XP_015138965.1|//PREDICTED: hydroxyacid oxidase 1 isoform X1 [Gallus gallus];gi|765099193|ref|NP_001186371.2|//hydroxyacid oxidase 1 [Gallus gallus];gi|971386250|ref|XP_015138966.1|//PREDICTED: hydroxyacid oxidase 1 isoform X2 [Gallus gallus]
107051251	646	92.73	0	-7.70756	2.42905e-21	Down	1.32646e-21	LOC107051251	NA	NA	NA	K19347//SUN domain-containing protein 1/2	gi|971451640|ref|XP_015130383.1|//PREDICTED: sperm-associated antigen 4 protein-like [Gallus gallus]
107049103	2034	216.77	458.85	1.09369	3.1668e-21	Up	1.73641e-21	LOC107049103	NA	NA	NA	NA	gi|971415401|ref|XP_015148268.1|//PREDICTED: serine/arginine repetitive matrix protein 1-like isoform X1 [Gallus gallus];gi|971415403|ref|XP_015148269.1|//PREDICTED: proline-rich protein 36-like isoform X2 [Gallus gallus]
424583	2955	227	67	-1.74863	3.22e-21	Down	1.76917e-21	KIF2C	NA	NA	NA	K10393//kinesin family member 2/24	gi|971409474|ref|XP_015146785.1|//PREDICTED: kinesin-like protein KIF2C isoform X9 [Gallus gallus];gi|971409470|ref|XP_015146782.1|//PREDICTED: kinesin-like protein KIF2C isoform X7 [Gallus gallus];gi|971409476|ref|XP_015146786.1|//PREDICTED: kinesin-like protein KIF2C isoform X10 [Gallus gallus];gi|971409464|ref|XP_015146779.1|//PREDICTED: kinesin-like protein KIF2C isoform X4 [Gallus gallus];gi…
107056892	976	97.94	7.13	-3.76809	4.03662e-21	Down	2.2246e-21	LOC107056892	NA	NA	NA	K06840//semaphorin 3	gi|971443950|ref|XP_015157350.1|//PREDICTED: semaphorin-3D-like [Gallus gallus]
415958	13081	453.57	210.05	-1.09876	5.48884e-21	Down	3.03616e-21	ATP2B2	GO:0005929//cilium;GO:0070062//extracellular exosome;GO:0005783//endoplasmic reticulum;GO:0005887//integral component of plasma membrane;GO:0016324//apical plasma membrane;GO:0005829//cytosol;GO:0043025//neuronal cell body	GO:0005524//ATP binding;GO:0008022//protein C-terminus binding;GO:0005388//calcium-transporting ATPase activity;GO:0005509//calcium ion binding;GO:0005516//calmodulin binding;GO:0030165//PDZ domain binding;GO:0030899//calcium-dependent ATPase activity	GO:0070588//calcium ion transmembrane transport;GO:0060088//auditory receptor cell stereocilium organization;GO:0051480//regulation of cytosolic calcium ion concentration;GO:0050808//synapse organization;GO:0008361//regulation of cell size;GO:0006996//organelle organization;GO:0021707//cerebellar granule cell differentiation;GO:0042428//serotonin metabolic process;GO:0007626//locomotory behavior;…	K05850//Ca2+ transporting ATPase, plasma membrane [EC:3.6.3.8]	gi|971417105|ref|XP_015148963.1|//PREDICTED: plasma membrane calcium-transporting ATPase 2 [Gallus gallus]
426704	1101	332	131	-1.32979	8.70783e-21	Down	4.85238e-21	KNSTRN	NA	NA	NA	NA	gi|71897223|ref|NP_001026564.1|//small kinetochore-associated protein [Gallus gallus]
422511	844	148	28	-2.39027	9.7931e-21	Down	5.47171e-21	LOC422511	NA	NA	NA	K10032//C-X-C motif chemokine 13	gi|348591883|emb|CCC15120.1|//chemokine [Gallus gallus];gi|348591881|emb|CCC15119.1|//chemokine [Gallus gallus];gi|971394251|ref|XP_004941081.2|//PREDICTED: C-X-C motif chemokine 13 isoform X1 [Gallus gallus]
107055405	2078	291.68	106.53	-1.4413	1.18894e-20	Down	6.65403e-21	LOC107055405	GO:0012506//vesicle membrane;GO:0031410//cytoplasmic vesicle;GO:0005886//plasma membrane	NA	NA	NA	gi|971437046|ref|XP_015155801.1|//PREDICTED: transmembrane protein 198-like [Gallus gallus]
424473	3781	10	103	3.3764	1.23444e-20	Up	6.91098e-21	LOC424473	NA	NA	NA	NA	gi|971408158|ref|XP_015146244.1|//PREDICTED: hornerin-like isoform X5 [Gallus gallus];gi|971408214|ref|XP_015146273.1|//PREDICTED: hornerin-like isoform X33 [Gallus gallus];gi|971408152|ref|XP_015146240.1|//PREDICTED: hornerin-like isoform X2 [Gallus gallus];gi|971408182|ref|XP_015146256.1|//PREDICTED: hornerin-like isoform X17 [Gallus gallus];gi|971408156|ref|XP_015146242.1|//PREDICTED: hornerin…
428431	3565	112	13	-3.09509	1.284e-20	Down	7.20037e-21	GPNMB	GO:0016021//integral component of membrane	NA	NA	K20732//transmembrane glycoprotein NMB	gi|363729938|ref|XP_425991.2|//PREDICTED: transmembrane glycoprotein NMB [Gallus gallus]
418410	4163	484	233	-1.04285	1.33461e-20	Down	7.48669e-21	KIAA1524	NA	NA	NA	NA	gi|71896785|ref|NP_001025956.1|//protein CIP2A homolog [Gallus gallus]
423688	3488	158	33	-2.24756	1.40891e-20	Down	7.90868e-21	DNA2	NA	NA	NA	K10742//DNA replication ATP-dependent helicase Dna2 [EC:3.6.4.12]	gi|971401425|ref|XP_015134170.1|//PREDICTED: DNA replication ATP-dependent helicase/nuclease DNA2 isoform X1 [Gallus gallus];gi|57529868|ref|NP_001006497.1|//DNA replication ATP-dependent helicase/nuclease DNA2 [Gallus gallus]
419751	12178	444.48	206.67	-1.09296	1.9503e-20	Down	1.0984e-20	GRIK4	GO:0032983//kainate selective glutamate receptor complex;GO:0030054//cell junction;GO:0042734//presynaptic membrane;GO:0045211//postsynaptic membrane	GO:0004970//ionotropic glutamate receptor activity;GO:0005234//extracellular-glutamate-gated ion channel activity	GO:0035235//ionotropic glutamate receptor signaling pathway;GO:0034220//ion transmembrane transport	K05204//glutamate receptor, ionotropic kainate 4	gi|971431850|ref|XP_015153663.1|//PREDICTED: glutamate receptor ionotropic, kainate 4 isoform X1 [Gallus gallus];gi|971431856|ref|XP_015153666.1|//PREDICTED: glutamate receptor ionotropic, kainate 4 isoform X2 [Gallus gallus]
768471	2863	511	253	-1.00236	2.14378e-20	Down	1.21016e-20	NUDT12	GO:0005634//nucleus;GO:0005777//peroxisome	GO:0046872//metal ion binding;GO:0035529//NADH pyrophosphatase activity;GO:0000210//NAD+ diphosphatase activity	GO:0019677//NAD catabolic process;GO:0006742//NADP catabolic process	K03426//NAD+ diphosphatase [EC:3.6.1.22]	gi|118104260|ref|XP_001231287.1|//PREDICTED: peroxisomal NADH pyrophosphatase NUDT12 [Gallus gallus]
421019	2658	54	196	1.87165	2.37634e-20	Up	1.34426e-20	CBLN2	GO:0005615//extracellular space	NA	GO:0051965//positive regulation of synapse assembly	K18744//caprin-2	gi|284520111|ref|NP_001165239.1|//cerebellin-2 precursor [Gallus gallus];gi|971383071|ref|XP_015137874.1|//PREDICTED: cerebellin-2 isoform X1 [Gallus gallus];gi|971383073|ref|XP_015137875.1|//PREDICTED: cerebellin-2 isoform X2 [Gallus gallus]
107049705	662	309.38	119.32	-1.36271	3.65957e-20	Down	2.08215e-20	LOC107049705	NA	NA	NA	K06264//platelet glycoprotein VI;K06512//leukocyte immunoglobulin-like receptor	gi|971448168|ref|XP_015128985.1|//PREDICTED: uncharacterized protein LOC107049705 isoform X1 [Gallus gallus];gi|971448172|ref|XP_015128987.1|//PREDICTED: uncharacterized protein LOC107049705 isoform X3 [Gallus gallus];gi|971448170|ref|XP_015128986.1|//PREDICTED: uncharacterized protein LOC107049705 isoform X2 [Gallus gallus]
423298	1378	110	13.06	-3.06245	4.27877e-20	Down	2.444e-20	ACTC1	GO:0016020//membrane;GO:0070062//extracellular exosome;GO:0072562//blood microparticle;GO:0005925//focal adhesion;GO:0030027//lamellipodium;GO:0030175//filopodium;GO:0044297//cell body;GO:0042643//actomyosin, actin portion;GO:0005829//cytosol;GO:0031674//I band	GO:0005524//ATP binding;GO:0017022//myosin binding;GO:0016887//ATPase activity	GO:0042493//response to drug;GO:0030049//muscle filament sliding;GO:0043066//negative regulation of apoptotic process;GO:0010628//positive regulation of gene expression;GO:0045471//response to ethanol;GO:0055008//cardiac muscle tissue morphogenesis;GO:0090131//mesenchyme migration;GO:0060048//cardiac muscle contraction;GO:0055003//cardiac myofibril assembly;GO:0030240//skeletal muscle thin filame…	K12314//actin, alpha cardiac muscle	gi|726987387|ref|XP_010390022.1|//PREDICTED: actin, alpha cardiac muscle 1 [Corvus cornix cornix]
428448	10229	88	254	1.54108	4.4852e-20	Up	2.56692e-20	COL6A6	NA	NA	NA	K06238//collagen, type VI, alpha	gi|971380811|ref|XP_015137249.1|//PREDICTED: collagen alpha-6(VI) chain [Gallus gallus]
396109	2028	203.83	431.25	1.09299	4.9761e-20	Up	2.85712e-20	FOXD1	GO:0005634//nucleus	GO:0000981//RNA polymerase II transcription factor activity, sequence-specific DNA binding;GO:0043565//sequence-specific DNA binding	GO:0006357//regulation of transcription from RNA polymerase II promoter;GO:0007275//multicellular organism development	K09397//forkhead box protein D	gi|771916274|ref|NP_990523.2|//forkhead box protein D1 [Gallus gallus]
107050063	1814	11.99	105.27	3.14602	6.75181e-20	Up	3.89803e-20	LOC107050063	NA	NA	NA	K14165//atypical dual specificity phosphatase [EC:3.1.3.16 3.1.3.48];K04257//olfactory receptor	gi|971449084|ref|XP_015129336.1|//PREDICTED: uncharacterized protein LOC107050063 [Gallus gallus]
395468	808	204.79	58.92	-1.78549	8.02767e-20	Down	4.64507e-20	CCL4	GO:0005615//extracellular space	GO:0008009//chemokine activity;GO:0048020//CCR chemokine receptor binding	GO:0007186//G-protein coupled receptor signaling pathway;GO:0048247//lymphocyte chemotaxis;GO:0030593//neutrophil chemotaxis;GO:0070098//chemokine-mediated signaling pathway;GO:0043547//positive regulation of GTPase activity;GO:0050729//positive regulation of inflammatory response;GO:0071356//cellular response to tumor necrosis factor;GO:0071346//cellular response to interferon-gamma;GO:0071347//…	K16595//C-C motif chemokine 13;K12964//C-C motif chemokine 4	gi|971425647|ref|XP_015151152.1|//PREDICTED: chemokine C-C motif ligand 4 isoform X1 [Gallus gallus];gi|45382627|ref|NP_990051.1|//chemokine C-C motif ligand 4 precursor [Gallus gallus]
422692	1574	138	332	1.27835	8.41116e-20	Up	4.87479e-20	TIFA	GO:0005622//intracellular	NA	GO:0007249//I-kappaB kinase/NF-kappaB signaling	NA	gi|971393387|ref|XP_015131824.1|//PREDICTED: TRAF-interacting protein with FHA domain-containing protein A isoform X1 [Gallus gallus];gi|513183677|ref|XP_420645.2|//PREDICTED: TRAF-interacting protein with FHA domain-containing protein A isoform X2 [Gallus gallus]
100859189	912	184.34	48.35	-1.91895	1.08688e-19	Down	6.32541e-20	MZB1	NA	NA	NA	K14611//solute carrier family 23 (nucleobase transporter), member 1/2;K15410//elongation factor 1-delta	gi|363739056|ref|XP_003642115.1|//PREDICTED: marginal zone B- and B1-cell-specific protein [Gallus gallus]
107050064	1264	0	81.76	7.36515	1.19792e-19	Up	6.98279e-20	LOC107050064	NA	NA	NA	NA	gi|971426146|ref|XP_015151382.1|//PREDICTED: outer dense fiber protein 3-like [Gallus gallus]
421716	1345	295.02	113.03	-1.37228	1.70118e-19	Down	9.99543e-20	CENPW	GO:0005634//nucleus;GO:0000777//condensed chromosome kinetochore	GO:0003677//DNA binding;GO:0046982//protein heterodimerization activity	GO:0007059//chromosome segregation;GO:0051301//cell division;GO:0051382//kinetochore assembly	NA	gi|479277991|ref|NP_001264662.1|//centromere protein W [Gallus gallus];gi|971388834|ref|XP_015139919.1|//PREDICTED: centromere protein W isoform X1 [Gallus gallus]
100857277	708	131	23	-2.49803	1.99636e-19	Down	1.17818e-19	SLN	NA	NA	NA	NA	gi|694016459|ref|NP_001289116.1|//sarcolipin [Gallus gallus]
100858555	727	441	210	-1.05856	2.39746e-19	Down	1.41757e-19	MFAP2	NA	NA	NA	K13526//cation-transporting ATPase 13A2 [EC:3.6.3.-]	gi|971429082|ref|XP_015152522.1|//PREDICTED: microfibrillar-associated protein 2 [Gallus gallus]
424300	8431	206	61	-1.74393	2.4203e-19	Down	1.43153e-19	LOC424300	NA	NA	NA	K02599//Notch 1	gi|513195368|ref|XP_004943061.1|//PREDICTED: von Willebrand factor D and EGF domain-containing protein-like [Gallus gallus]
428621	5405	11	100.43	3.20244	2.43438e-19	Up	1.44076e-19	HS3ST5	GO:0016021//integral component of membrane	GO:0008467//[heparan sulfate]-glucosamine 3-sulfotransferase 1 activity	GO:0046596//regulation of viral entry into host cell;GO:0006477//protein sulfation;GO:0050819//negative regulation of coagulation;GO:0015015//heparan sulfate proteoglycan biosynthetic process, enzymatic modification	K08104//[heparan sulfate]-glucosamine 3-sulfotransferase 5 [EC:2.8.2.23]	gi|50744932|ref|XP_426178.1|//PREDICTED: heparan sulfate glucosamine 3-O-sulfotransferase 5 [Gallus gallus]
424347	17443	317.16	127.62	-1.30153	2.45356e-19	Down	1.45257e-19	KIF14	NA	NA	NA	K17915//kinesin family member 14	gi|363736430|ref|XP_422190.3|//PREDICTED: kinesin-like protein KIF14 [Gallus gallus]
776400	1682	161	363	1.18474	2.93322e-19	Up	1.73927e-19	CCR8L	GO:0016021//integral component of membrane	GO:0004950//chemokine receptor activity	GO:0007186//G-protein coupled receptor signaling pathway;GO:0070098//chemokine-mediated signaling pathway;GO:0006935//chemotaxis	K04183//C-C chemokine receptor type 8	gi|124249288|ref|NP_001074363.1|//C-C chemokine receptor 8 like [Gallus gallus];gi|971380342|ref|XP_015137080.1|//PREDICTED: C-C chemokine receptor 8 like isoform X1 [Gallus gallus]
419920	666	214	66	-1.68524	3.64225e-19	Down	2.16443e-19	TREM2	GO:0043231//intracellular membrane-bounded organelle;GO:0016021//integral component of membrane	GO:0097110//scaffold protein binding;GO:0001530//lipopolysaccharide binding;GO:0042834//peptidoglycan binding;GO:0070891//lipoteichoic acid binding	GO:0050731//positive regulation of peptidyl-tyrosine phosphorylation;GO:0050850//positive regulation of calcium-mediated signaling;GO:1903082//positive regulation of C-C chemokine receptor CCR7 signaling pathway;GO:0002588//positive regulation of antigen processing and presentation of peptide antigen via MHC class II;GO:0006911//phagocytosis, engulfment;GO:0032497//detection of lipopolysaccharide…	K14378//triggering receptor expressed on myeloid cells 2	gi|83721957|ref|NP_001032921.1|//triggering receptor expressed on myeloid cells 2 precursor [Gallus gallus]
107051510	1485	1.81	74.78	5.38042	3.97521e-19	Up	2.36525e-19	LOC107051510	NA	NA	NA	NA	gi|971377265|ref|XP_015130578.1|//PREDICTED: uncharacterized protein LOC107051510 [Gallus gallus]
421939	1782	353.45	152.1	-1.20466	4.12976e-19	Down	2.45798e-19	ATP6V1C2	GO:0005765//lysosomal membrane;GO:0070062//extracellular exosome;GO:0033180//proton-transporting V-type ATPase, V1 domain	GO:0008553//hydrogen-exporting ATPase activity, phosphorylative mechanism;GO:0046983//protein dimerization activity	GO:0030177//positive regulation of Wnt signaling pathway;GO:0015991//ATP hydrolysis coupled proton transport	K02148//V-type H+-transporting ATPase subunit C	gi|50745029|ref|XP_419951.1|//PREDICTED: V-type proton ATPase subunit C 2 [Gallus gallus]
418879	9099	95	9	-3.3881	4.55738e-19	Down	2.71588e-19	ATP7B	GO:0016323//basolateral plasma membrane;GO:0005770//late endosome;GO:0005887//integral component of plasma membrane;GO:0005802//trans-Golgi network;GO:0048471//perinuclear region of cytoplasm	GO:0004008//copper-exporting ATPase activity;GO:0005524//ATP binding;GO:0005507//copper ion binding	GO:0006878//cellular copper ion homeostasis;GO:0015680//intracellular copper ion transport;GO:0051208//sequestering of calcium ion;GO:0006882//cellular zinc ion homeostasis;GO:0015677//copper ion import;GO:0046688//response to copper ion;GO:0060003//copper ion export	K17686//Cu+-exporting ATPase [EC:3.6.3.54]	gi|971377472|ref|XP_015131564.1|//PREDICTED: copper-transporting ATPase 2 isoform X2 [Gallus gallus];gi|363729485|ref|XP_417073.3|//PREDICTED: copper-transporting ATPase 2 isoform X1 [Gallus gallus];gi|971377474|ref|XP_015131568.1|//PREDICTED: copper-transporting ATPase 2 isoform X3 [Gallus gallus]
395719	721	204	61	-1.72986	5.68399e-19	Down	3.39889e-19	TK1	GO:0005737//cytoplasm	GO:0005524//ATP binding;GO:0042802//identical protein binding;GO:0008270//zinc ion binding;GO:0004797//thymidine kinase activity	GO:0009157//deoxyribonucleoside monophosphate biosynthetic process;GO:0016310//phosphorylation;GO:0051289//protein homotetramerization;GO:0071897//DNA biosynthetic process;GO:0009165//nucleotide biosynthetic process;GO:0046104//thymidine metabolic process	K00857//thymidine kinase [EC:2.7.1.21]	gi|53933295|ref|NP_990229.1|//thymidine kinase, cytosolic [Gallus gallus]
424063	5139	158	37	-2.0825	7.42549e-19	Down	4.45408e-19	SATB2	NA	NA	NA	K19774//homeobox domain-containing protein;K20684//Rho guanine nucleotide exchange factor 5	gi|971404698|ref|XP_015144896.1|//PREDICTED: DNA-binding protein SATB2 isoform X1 [Gallus gallus];gi|312283698|ref|NP_001186039.1|//DNA-binding protein SATB2 [Gallus gallus]
107049663	801	78.26	0	-7.27837	7.61529e-19	Down	4.56935e-19	LOC107049663	NA	NA	NA	K14377//osteoclast-associated immunoglobulin-like receptor;K06264//platelet glycoprotein VI	gi|971447951|ref|XP_015128892.1|//PREDICTED: platelet glycoprotein VI-like [Gallus gallus]
426276	2455	413.45	194.02	-1.07968	8.81393e-19	Down	5.29839e-19	NCAPH2	NA	NA	NA	K11490//condensin-2 complex subunit H2	gi|971369842|ref|XP_004937455.2|//PREDICTED: condensin-2 complex subunit H2 isoform X2 [Gallus gallus];gi|971369856|ref|XP_004937459.2|//PREDICTED: condensin-2 complex subunit H2 isoform X9 [Gallus gallus];gi|513157269|ref|XP_004937453.1|//PREDICTED: condensin-2 complex subunit H2 isoform X11 [Gallus gallus];gi|971369854|ref|XP_015136733.1|//PREDICTED: condensin-2 complex subunit H2 isoform X8 [G…
396281	1055	381	172	-1.13555	8.87821e-19	Down	5.33868e-19	PTHLH	GO:0005615//extracellular space;GO:0005654//nucleoplasm;GO:0005794//Golgi apparatus;GO:0005576//extracellular region	GO:0051428//peptide hormone receptor binding;GO:0005179//hormone activity	GO:0010468//regulation of gene expression;GO:0032331//negative regulation of chondrocyte differentiation;GO:1903042//negative regulation of chondrocyte hypertrophy;GO:0003420//regulation of growth plate cartilage chondrocyte proliferation;GO:0007189//adenylate cyclase-activating G-protein coupled receptor signaling pathway;GO:1902733//regulation of growth plate cartilage chondrocyte differentiati…	NA	gi|291575168|ref|NP_990669.2|//parathyroid hormone-related protein isoform 2 preproprotein [Gallus gallus];gi|971373473|ref|XP_015147621.1|//PREDICTED: parathyroid hormone-related protein isoform X1 [Gallus gallus];gi|55953152|dbj|BAD72831.1|//parathyroid hormone-related protein precursor [Gallus gallus];gi|291575170|ref|NP_001167577.1|//parathyroid hormone-related protein isoform 1 preproprotein…
422015	597	361	159	-1.17114	1.06172e-18	Down	6.40213e-19	PTRHD1	NA	NA	NA	K14394//low molecular weight phosphotyrosine protein phosphatase [EC:3.1.3.2 3.1.3.48]	gi|513179499|ref|XP_420022.3|//PREDICTED: putative peptidyl-tRNA hydrolase PTRHD1 [Gallus gallus]
421396	1319	82	5	-4.02379	1.16316e-18	Down	7.02462e-19	HAAO	NA	NA	NA	K00452//3-hydroxyanthranilate 3,4-dioxygenase [EC:1.13.11.6]	gi|363731785|ref|XP_419453.3|//PREDICTED: 3-hydroxyanthranilate 3,4-dioxygenase isoform X1 [Gallus gallus];gi|513175105|ref|XP_004935413.1|//PREDICTED: 3-hydroxyanthranilate 3,4-dioxygenase isoform X2 [Gallus gallus]
420922	5944	459	227	-1.00397	1.56933e-18	Down	9.49807e-19	CTNND2	NA	NA	NA	K05690//catenin (cadherin-associated protein), delta 1	gi|971382745|ref|XP_015137748.1|//PREDICTED: catenin delta-2 isoform X6 [Gallus gallus];gi|971382739|ref|XP_015137745.1|//PREDICTED: catenin delta-2 isoform X3 [Gallus gallus];gi|971382735|ref|XP_015137743.1|//PREDICTED: catenin delta-2 isoform X1 [Gallus gallus];gi|971382737|ref|XP_015137744.1|//PREDICTED: catenin delta-2 isoform X2 [Gallus gallus];gi|971382741|ref|XP_015137746.1|//PREDICTED: ca…
426482	3020	287	112	-1.34572	1.70216e-18	Down	1.03115e-18	SHC4	NA	NA	NA	K17449//SHC-transforming protein 4	gi|971413016|ref|XP_424123.5|//PREDICTED: SHC-transforming protein 4 isoform X1 [Gallus gallus];gi|971413018|ref|XP_004943864.2|//PREDICTED: SHC-transforming protein 4 isoform X2 [Gallus gallus]
419458	1596	398	185	-1.09341	1.75779e-18	Down	1.06583e-18	FBLIM1	GO:0001725//stress fiber;GO:0005925//focal adhesion	GO:0008270//zinc ion binding;GO:0031005//filamin binding	GO:0033623//regulation of integrin activation	K06273//zyxin;K16676//lipoma-prefererred partner	gi|971429471|ref|XP_015152662.1|//PREDICTED: filamin-binding LIM protein 1 isoform X1 [Gallus gallus]
415860	3596	165.5	42	-1.96654	2.23422e-18	Down	1.3572e-18	CDH1	GO:0070062//extracellular exosome;GO:0005925//focal adhesion;GO:0016235//aggresome;GO:0005802//trans-Golgi network;GO:0030027//lamellipodium;GO:0048471//perinuclear region of cytoplasm;GO:0016342//catenin complex;GO:0030864//cortical actin cytoskeleton;GO:0005913//cell-cell adherens junction;GO:0009898//cytoplasmic side of plasma membrane;GO:0016021//integral component of membrane;GO:0043296//api…	GO:0045295//gamma-catenin binding;GO:0050839//cell adhesion molecule binding;GO:0005509//calcium ion binding;GO:0030506//ankyrin binding;GO:0008013//beta-catenin binding;GO:0032794//GTPase activating protein binding	GO:0022408//negative regulation of cell-cell adhesion;GO:0034332//adherens junction organization;GO:0071681//cellular response to indole-3-methanol;GO:0007156//homophilic cell adhesion via plasma membrane adhesion molecules;GO:0071285//cellular response to lithium ion;GO:0042993//positive regulation of transcription factor import into nucleus;GO:0045893//positive regulation of transcription, DNA-…	K05689//cadherin 1, type 1, E-cadherin	gi|971414914|ref|XP_015148067.1|//PREDICTED: cadherin-1 isoform X1 [Gallus gallus];gi|471270244|ref|NP_001034347.2|//cadherin-1 precursor [Gallus gallus]
420487	4434	193.55	57.1	-1.74931	2.43973e-18	Down	1.4825e-18	MASTL	NA	NA	NA	K16309//serine/threonine-protein kinase greatwall [EC:2.7.11.1]	gi|118085660|ref|XP_418589.2|//PREDICTED: serine/threonine-protein kinase greatwall isoform X1 [Gallus gallus];gi|971381631|ref|XP_015137544.1|//PREDICTED: serine/threonine-protein kinase greatwall isoform X2 [Gallus gallus]
101749727	1126	75.54	0	-7.22734	2.64479e-18	Down	1.61055e-18	LOC101749727	NA	NA	NA	K19827//microtuble-actin crosslinking factor 1	gi|971450762|ref|XP_015130032.1|//PREDICTED: microtubule-actin cross-linking factor 1-like, partial [Gallus gallus]
414841	2160	115.09	18.23	-2.64655	2.7046e-18	Down	1.64848e-18	CYP2C8	GO:0031090//organelle membrane;GO:0005789//endoplasmic reticulum membrane	GO:0008395//steroid hydroxylase activity;GO:0020037//heme binding;GO:0005506//iron ion binding;GO:0070330//aromatase activity;GO:0008392//arachidonic acid epoxygenase activity	GO:0042493//response to drug;GO:0055114//oxidation-reduction process;GO:0019373//epoxygenase P450 pathway	K17853//cytochrome P450 family 2 subfamily H	gi|48976111|ref|NP_001001757.1|//cytochrome P450 2H2 precursor [Gallus gallus]
100859557	8685	253	92	-1.4476	3.09438e-18	Down	1.88893e-18	LOC100859557	NA	NA	NA	K11492//condensin-2 complex subunit G2	gi|363729915|ref|XP_003640726.1|//PREDICTED: condensin-2 complex subunit G2 [Gallus gallus]
415935	4499	391.03	181.54	-1.09516	3.15033e-18	Down	1.92367e-18	FANCD2	NA	NA	NA	K10891//fanconi anemia group D2 protein	gi|873460493|ref|NP_001034350.2|//Fanconi anemia group D2 protein [Gallus gallus]
425719	1426	80	5	-3.98817	3.74572e-18	Down	2.29419e-18	TM6SF2	NA	NA	NA	K06853//hyaluronan and proteoglycan link protein 4	gi|971436567|ref|XP_015155604.1|//PREDICTED: transmembrane 6 superfamily member 2 isoform X1 [Gallus gallus];gi|363743876|ref|XP_423447.3|//PREDICTED: transmembrane 6 superfamily member 2 isoform X2 [Gallus gallus]
770222	987	192	398	1.06349	7.21182e-18	Up	4.45602e-18	SETD9	NA	NA	NA	NA	gi|513229224|ref|XP_001233556.3|//PREDICTED: SET domain-containing protein 9 isoform X2 [Gallus gallus];gi|971438361|ref|XP_004937305.2|//PREDICTED: SET domain-containing protein 9 isoform X1 [Gallus gallus]
777017	1680	34.7	146.64	2.0911	7.87884e-18	Up	4.87256e-18	LOC777017	NA	NA	NA	NA	gi|971443253|ref|XP_015157050.1|//PREDICTED: uncharacterized protein LOC777017 isoform X1 [Gallus gallus];gi|971443255|ref|XP_015157051.1|//PREDICTED: uncharacterized protein LOC777017 isoform X2 [Gallus gallus]
101748207	1628	168	45	-1.88863	9.75688e-18	Down	6.05034e-18	LOC101748207	NA	NA	NA	K13912//deleted in malignant brain tumors 1 protein	gi|971441032|ref|XP_015156089.1|//PREDICTED: CD5 antigen-like isoform X2 [Gallus gallus];gi|971441030|ref|XP_015156088.1|//PREDICTED: CD5 antigen-like isoform X1 [Gallus gallus]
418658	2162	395.41	187.13	-1.06748	9.9517e-18	Down	6.17855e-18	ARSD	GO:0016021//integral component of membrane	GO:0008484//sulfuric ester hydrolase activity	GO:0008152//metabolic process	K12374//arylsulfatase D/F/H [EC:3.1.6.-]	gi|118084193|ref|XP_416855.2|//PREDICTED: arylsulfatase D [Gallus gallus]
107050675	1192	354	159	-1.14289	1.00382e-17	Down	6.23409e-18	LOC107050675	NA	NA	NA	K11661//helicase SRCAP [EC:3.6.4.-];K04079//molecular chaperone HtpG	gi|971450381|ref|XP_015129865.1|//PREDICTED: uncharacterized protein LOC107050675 [Gallus gallus]
107049892	2141	44.47	164.86	1.90217	1.01434e-17	Up	6.30136e-18	LOC107049892	NA	NA	NA	K14377//osteoclast-associated immunoglobulin-like receptor;K06264//platelet glycoprotein VI;K06512//leukocyte immunoglobulin-like receptor	gi|971448671|ref|XP_015129176.1|//PREDICTED: T-cell-interacting, activating receptor on myeloid cells protein 1-like [Gallus gallus]
395840	484	119	289	1.29194	1.0479e-17	Up	6.51373e-18	AvBD2	GO:0005576//extracellular region	NA	GO:0042742//defense response to bacterium	K21100//beta-defensin 4	gi|319655707|ref|NP_990323.2|//gallinacin-2 precursor [Gallus gallus]
430280	1005	197	61	-1.67948	1.08921e-17	Down	6.77659e-18	HSPB7	NA	NA	NA	K09546//heat shock protein beta-7	gi|118101135|ref|XP_427836.2|//PREDICTED: heat shock protein beta-7 [Gallus gallus]
416898	2507	6	80	3.7488	1.27357e-17	Up	7.94962e-18	FOXN4	GO:0005634//nucleus	GO:0003682//chromatin binding;GO:0001158//enhancer sequence-specific DNA binding;GO:0003700//transcription factor activity, sequence-specific DNA binding	GO:0035881//amacrine cell differentiation;GO:0010842//retina layer formation;GO:0060579//ventral spinal cord interneuron fate commitment;GO:0045893//positive regulation of transcription, DNA-templated	K09407//forkhead box protein N	gi|134085836|ref|NP_001076828.1|//forkhead box protein N4 [Gallus gallus]
417973	1248	185	55	-1.73819	1.85247e-17	Down	1.16389e-17	LOC417973	NA	NA	NA	NA	gi|971372785|ref|XP_429539.4|//PREDICTED: uncharacterized protein LOC417973 isoform X1 [Gallus gallus];gi|971372787|ref|XP_015144782.1|//PREDICTED: uncharacterized protein LOC417973 isoform X2 [Gallus gallus]
776801	1749	112.73	277.56	1.31176	1.94022e-17	Up	1.22047e-17	LOC776801	NA	NA	NA	K09228//KRAB domain-containing zinc finger protein	gi|971448332|ref|XP_015129053.1|//PREDICTED: LOW QUALITY PROTEIN: zinc finger protein 883-like, partial [Gallus gallus]
422452	5325	190.03	391.18	1.05344	2.40692e-17	Up	1.5212e-17	TBC1D9	NA	NA	NA	K19951//TBC1 domain family member 8/9	gi|971394450|ref|XP_015132174.1|//PREDICTED: TBC1 domain family member 9 isoform X3 [Gallus gallus];gi|513182116|ref|XP_004941005.1|//PREDICTED: TBC1 domain family member 9 isoform X1 [Gallus gallus];gi|971394448|ref|XP_015132173.1|//PREDICTED: TBC1 domain family member 9 isoform X2 [Gallus gallus]
419968	3151	304	128	-1.2361	2.76718e-17	Down	1.75198e-17	KIF18B	GO:0005634//nucleus;GO:0005874//microtubule;GO:0005737//cytoplasm;GO:0005871//kinesin complex	GO:0005524//ATP binding;GO:0008017//microtubule binding;GO:0008574//ATP-dependent microtubule motor activity, plus-end-directed	GO:0000070//mitotic sister chromatid segregation;GO:0007018//microtubule-based movement;GO:0051301//cell division;GO:0007019//microtubule depolymerization	K10401//kinesin family member 18/19	gi|71896333|ref|NP_001026099.1|//kinesin-like protein KIF18B [Gallus gallus]
430912	1700	252	95	-1.39559	2.7821e-17	Down	1.76194e-17	DUSP28	NA	NA	NA	K14165//atypical dual specificity phosphatase [EC:3.1.3.16 3.1.3.48]	gi|971409912|ref|XP_015132435.1|//PREDICTED: dual specificity phosphatase 28 isoform X1 [Gallus gallus];gi|408440827|ref|NP_001258456.1|//dual specificity phosphatase 28 [Gallus gallus]
427845	4065	25	124	2.32217	3.18346e-17	Up	2.0185e-17	SLC26A4	NA	NA	NA	K14702//solute carrier family 26 (sodium-independent chloride/iodide transporter), member 4	gi|513157871|ref|XP_004934811.1|//PREDICTED: pendrin isoform X2 [Gallus gallus];gi|363727504|ref|XP_425419.3|//PREDICTED: pendrin isoform X1 [Gallus gallus]
428956	6502	294	122	-1.2571	3.56387e-17	Down	2.26501e-17	ZNF488	GO:0005634//nucleus	GO:0046872//metal ion binding	GO:0045892//negative regulation of transcription, DNA-templated;GO:0014003//oligodendrocyte development;GO:0048714//positive regulation of oligodendrocyte differentiation	K20797//PR domain zinc finger protein 8 [EC:2.1.1.-]	gi|118092780|ref|XP_426512.2|//PREDICTED: zinc finger protein 488 [Gallus gallus]
417748	1440	118.09	22	-2.41248	4.89079e-17	Down	3.1247e-17	GPR37	NA	NA	NA	K04243//G protein-coupled receptor 37 (endothelin receptor type B-like)	gi|126165305|ref|NP_001075168.1|//prosaposin receptor GPR37 precursor [Gallus gallus]
407777	514	39.04	150.28	1.95646	7.39537e-17	Up	4.76338e-17	AvBD7	GO:0005576//extracellular region	NA	GO:0050829//defense response to Gram-negative bacterium	K21100//beta-defensin 4	gi|48976031|ref|NP_001001194.1|//gallinacin-7 preproprotein [Gallus gallus]
387330	5131	150	38	-1.96906	7.81588e-17	Down	5.0415e-17	PAX5	GO:0005634//nucleus	GO:0000978//RNA polymerase II core promoter proximal region sequence-specific DNA binding;GO:0001077//transcriptional activator activity, RNA polymerase II core promoter proximal region sequence-specific binding	GO:0000122//negative regulation of transcription from RNA polymerase II promoter;GO:0035914//skeletal muscle cell differentiation;GO:0048701//embryonic cranial skeleton morphogenesis;GO:0021987//cerebral cortex development;GO:0021670//lateral ventricle development;GO:0045944//positive regulation of transcription from RNA polymerase II promoter;GO:0051573//negative regulation of histone H3-K9 meth…	K09383//paired box protein 5	gi|971440584|ref|XP_015136270.1|//PREDICTED: paired box protein Pax-5 isoform X1 [Gallus gallus];gi|45383313|ref|NP_989755.1|//paired box protein Pax-5 [Gallus gallus]
107054696	1825	206.85	410.49	1.00059	8.79454e-17	Up	5.68258e-17	LOC107054696	NA	NA	NA	K09228//KRAB domain-containing zinc finger protein;K09404//forkhead box protein K	gi|971422336|ref|XP_015150508.1|//PREDICTED: LOW QUALITY PROTEIN: zinc finger protein 692-like [Gallus gallus]
416618	2302	11	90	3.04425	8.94924e-17	Up	5.78421e-17	SDR42E2	GO:0016021//integral component of membrane	GO:0003854//3-beta-hydroxy-delta5-steroid dehydrogenase activity	GO:0006694//steroid biosynthetic process;GO:0055114//oxidation-reduction process	K07748//sterol-4alpha-carboxylate 3-dehydrogenase (decarboxylating) [EC:1.1.1.170]	gi|304434702|ref|NP_001182086.1|//putative short-chain dehydrogenase/reductase family 42E member 2 [Gallus gallus];gi|971418866|ref|XP_015149714.1|//PREDICTED: putative short-chain dehydrogenase/reductase family 42E member 2 isoform X2 [Gallus gallus]
424652	3131	163	45	-1.84504	8.9912e-17	Down	5.81467e-17	GLIS1	NA	NA	NA	K09232//zinc finger protein GLIS1/3	gi|971409208|ref|XP_015146687.1|//PREDICTED: zinc finger protein GLIS1 [Gallus gallus]
426356	593	152	332	1.13894	9.14818e-17	Up	5.91959e-17	S100A9	NA	GO:0005509//calcium ion binding;GO:0050786//RAGE receptor binding;GO:0008270//zinc ion binding;GO:0035662//Toll-like receptor 4 binding;GO:0008017//microtubule binding;GO:0050544//arachidonic acid binding	GO:0050727//regulation of inflammatory response;GO:0045087//innate immune response	K21128//protein S100-A9	gi|760997140|ref|NP_001292080.1|//protein MRP-126 [Gallus gallus]
374269	4524	174	51	-1.75869	9.18618e-17	Down	5.9476e-17	TP63	GO:0030425//dendrite;GO:0005654//nucleoplasm;GO:0005667//transcription factor complex;GO:0005829//cytosol;GO:0000790//nuclear chromatin	GO:0002039//p53 binding;GO:0042802//identical protein binding;GO:0001077//transcriptional activator activity, RNA polymerase II core promoter proximal region sequence-specific binding;GO:0003690//double-stranded DNA binding;GO:0044212//transcription regulatory region DNA binding;GO:0000989//transcription factor activity, transcription factor binding;GO:0050699//WW domain binding;GO:0003684//damag…	GO:0043589//skin morphogenesis;GO:0006338//chromatin remodeling;GO:0045747//positive regulation of Notch signaling pathway;GO:0010332//response to gamma radiation;GO:0030859//polarized epithelial cell differentiation;GO:0034644//cellular response to UV;GO:0043523//regulation of neuron apoptotic process;GO:2000381//negative regulation of mesoderm development;GO:0045617//negative regulation of kera…	K10149//tumor protein p63	gi|971410601|ref|XP_015146850.1|//PREDICTED: tumor protein 63 isoform X4 [Gallus gallus];gi|971410603|ref|XP_015146852.1|//PREDICTED: tumor protein 63 isoform X5 [Gallus gallus];gi|971410595|ref|XP_015146847.1|//PREDICTED: tumor protein 63 isoform X1 [Gallus gallus];gi|971410599|ref|XP_015146849.1|//PREDICTED: tumor protein 63 isoform X3 [Gallus gallus];gi|971410597|ref|XP_015146848.1|//PREDICTED…
101748329	7461	349.45	160.89	-1.10718	9.9926e-17	Down	6.4753e-17	LOC101748329	NA	NA	NA	K07856//Ras homolog gene family, member B;K04513//Ras homolog gene family, member A	gi|971390616|ref|XP_015140554.1|//PREDICTED: LOW QUALITY PROTEIN: rho-related GTP-binding protein RhoB-like [Gallus gallus]
427007	2432	193.81	62.28	-1.62597	1.02369e-16	Down	6.63933e-17	ANKS4B	NA	NA	NA	K15502//serine/threonine-protein phosphatase 6 regulatory ankyrin repeat subunit A	gi|50808535|ref|XP_424609.1|//PREDICTED: ankyrin repeat and SAM domain-containing protein 4B [Gallus gallus]
776186	1393	96.89	247.62	1.36554	1.24463e-16	Up	8.10003e-17	TMEM158	NA	NA	NA	K06732//CUB domain-containing protein 1	gi|971380742|ref|XP_001235310.3|//PREDICTED: transmembrane protein 158 [Gallus gallus]
107049102	3501	137.25	308.6	1.18076	1.56178e-16	Up	1.02047e-16	LOC107049102	NA	NA	NA	K17635//ral guanine nucleotide dissociation stimulator-like 1	gi|971443232|ref|XP_015157040.1|//PREDICTED: uncharacterized protein LOC107049102 [Gallus gallus]
770850	1946	257.65	101.51	-1.33196	1.56472e-16	Down	1.02269e-16	ANGPTL1	NA	NA	NA	K05465//angiopoietin 1;K05467//angiopoietin 4	gi|478621098|ref|NP_001264594.1|//angiopoietin-related protein 1 precursor [Gallus gallus]
424505	1830	244	93	-1.37975	1.59172e-16	Down	1.04063e-16	EPHX4	NA	NA	NA	K08726//soluble epoxide hydrolase / lipid-phosphate phosphatase [EC:3.3.2.10 3.1.3.76];K08059//interferon, gamma-inducible protein 30	gi|513197208|ref|XP_422345.4|//PREDICTED: epoxide hydrolase 4 [Gallus gallus]
395841	504	125	290	1.22595	1.71367e-16	Up	1.12163e-16	AvBD1	GO:0005576//extracellular region	NA	GO:0050832//defense response to fungus;GO:0031640//killing of cells of other organism;GO:0042742//defense response to bacterium	NA	gi|45384510|ref|NP_990324.1|//gallinacin-1 alpha precursor [Gallus gallus]
416208	3787	103	256	1.32533	1.9159e-16	Up	1.25649e-16	STC2	NA	NA	NA	NA	gi|971417931|ref|XP_015149324.1|//PREDICTED: stanniocalcin-2 isoform X2 [Gallus gallus];gi|363738949|ref|XP_414534.3|//PREDICTED: stanniocalcin-2 isoform X1 [Gallus gallus]
422048	1500	172	51	-1.74201	2.15994e-16	Down	1.42055e-16	CENPQ	GO:0005654//nucleoplasm;GO:0015629//actin cytoskeleton;GO:0000775//chromosome, centromeric region	NA	NA	K11509//centromere protein Q	gi|971390760|ref|XP_015140620.1|//PREDICTED: centromere protein Q isoform X1 [Gallus gallus];gi|971390764|ref|XP_015140622.1|//PREDICTED: centromere protein Q isoform X2 [Gallus gallus];gi|113206080|ref|NP_001038114.1|//centromere protein Q [Gallus gallus]
101749866	3104	67	3	-4.4693	2.43932e-16	Down	1.61019e-16	LRTM2	GO:0016021//integral component of membrane	NA	GO:0051965//positive regulation of synapse assembly;GO:0007409//axonogenesis	K06839//slit 2	gi|513160199|ref|XP_004937998.1|//PREDICTED: leucine-rich repeat and transmembrane domain-containing protein 2 isoform X1 [Gallus gallus]
415751	2879	168	49	-1.76578	2.52685e-16	Down	1.66891e-16	SHCBP1	NA	NA	NA	NA	gi|363738282|ref|XP_003641983.1|//PREDICTED: SHC SH2 domain-binding protein 1 [Gallus gallus]
424231	7799	89	11	-3.00447	2.6668e-16	Down	1.76383e-16	CNTNAP5	GO:0016021//integral component of membrane	NA	GO:0007155//cell adhesion	K07380//contactin associated protein-like 2	gi|971405834|ref|XP_015145306.1|//PREDICTED: contactin-associated protein-like 5 isoform X1 [Gallus gallus];gi|114326240|ref|NP_001041544.1|//contactin-associated protein-like 5 precursor [Gallus gallus];gi|971405836|ref|XP_015145307.1|//PREDICTED: contactin-associated protein-like 5 isoform X2 [Gallus gallus]
414337	778	53.79	173.83	1.7041	3.24742e-16	Up	2.15329e-16	CATH1	GO:0005576//extracellular region	GO:0001530//lipopolysaccharide binding;GO:0043565//sequence-specific DNA binding;GO:0046983//protein dimerization activity	GO:0019835//cytolysis;GO:0030593//neutrophil chemotaxis;GO:0050829//defense response to Gram-negative bacterium;GO:0006355//regulation of transcription, DNA-templated;GO:0042116//macrophage activation;GO:0008219//cell death;GO:0010629//negative regulation of gene expression;GO:0010628//positive regulation of gene expression;GO:0002381//immunoglobulin production involved in immunoglobulin mediated…	K13916//cathelicidin antimicrobial peptide	gi|48675879|ref|NP_001001605.1|//cathelicidin-1 precursor [Gallus gallus]
416158	904	212	75	-1.48727	4.06909e-16	Down	2.70871e-16	PTTG1	NA	NA	NA	K06635//securin	gi|480306397|ref|NP_001264669.1|//securin isoform 1 [Gallus gallus];gi|480306399|ref|NP_001264670.1|//securin isoform 2 [Gallus gallus]
419166	2580	69	4	-4.09669	4.11869e-16	Down	2.74249e-16	SGK2	GO:0005622//intracellular	GO:0004674//protein serine/threonine kinase activity;GO:0005524//ATP binding;GO:0015459//potassium channel regulator activity;GO:0017080//sodium channel regulator activity;GO:0005246//calcium channel regulator activity;GO:0017081//chloride channel regulator activity	GO:0001558//regulation of cell growth;GO:0018105//peptidyl-serine phosphorylation;GO:0042127//regulation of cell proliferation;GO:0006883//cellular sodium ion homeostasis;GO:0032411//positive regulation of transporter activity;GO:0035556//intracellular signal transduction;GO:0010765//positive regulation of sodium ion transport;GO:0042981//regulation of apoptotic process	K13303//serum/glucocorticoid-regulated kinase 2 [EC:2.7.11.1]	gi|513217647|ref|XP_004947055.1|//PREDICTED: serine/threonine-protein kinase Sgk2 isoform X2 [Gallus gallus];gi|971428508|ref|XP_015152260.1|//PREDICTED: serine/threonine-protein kinase Sgk2 isoform X1 [Gallus gallus]
378898	1150	324	147	-1.12835	4.62266e-16	Down	3.08408e-16	DDAH1	GO:0070062//extracellular exosome;GO:0005739//mitochondrion	GO:0016403//dimethylargininase activity	GO:0003073//regulation of systemic arterial blood pressure;GO:0045429//positive regulation of nitric oxide biosynthetic process;GO:0000052//citrulline metabolic process;GO:0006527//arginine catabolic process	K01482//dimethylargininase [EC:3.5.3.18]	gi|45383392|ref|NP_989713.1|//N(G),N(G)-dimethylarginine dimethylaminohydrolase 1 [Gallus gallus]
421222	964	103.06	253.06	1.30783	5.63172e-16	Up	3.76358e-16	MALL	NA	NA	NA	NA	gi|313661487|ref|NP_001186357.1|//MAL-like protein [Gallus gallus]
396069	572	184	372	1.02743	5.66212e-16	Up	3.78495e-16	GLRX	GO:0070062//extracellular exosome;GO:0005634//nucleus;GO:0005739//mitochondrion	GO:0009055//electron carrier activity;GO:0015035//protein disulfide oxidoreductase activity;GO:0047485//protein N-terminus binding	GO:0045838//positive regulation of membrane potential;GO:0055114//oxidation-reduction process;GO:2000651//positive regulation of sodium ion transmembrane transporter activity;GO:0045454//cell redox homeostasis	K03676//glutaredoxin 3	gi|45384038|ref|NP_990491.1|//glutaredoxin-1 [Gallus gallus]
396098	1166	85	10	-3.07563	5.92584e-16	Down	3.96675e-16	LOC396098	GO:0005887//integral component of plasma membrane	GO:0005035//death receptor activity;GO:0046983//protein dimerization activity	GO:0071887//leukocyte apoptotic process;GO:0007156//homophilic cell adhesion via plasma membrane adhesion molecules;GO:0008637//apoptotic mitochondrial changes;GO:0097323//B cell adhesion;GO:0006919//activation of cysteine-type endopeptidase activity involved in apoptotic process;GO:0006309//apoptotic DNA fragmentation	K06449//T-cell surface glycoprotein CD2	gi|46048756|ref|NP_990513.1|//B6.1 precursor [Gallus gallus]
416949	1358	187	61	-1.60433	6.59689e-16	Down	4.42208e-16	UPB1	NA	NA	NA	K01431//beta-ureidopropionase [EC:3.5.1.6]	gi|50756617|ref|XP_415242.1|//PREDICTED: beta-ureidopropionase [Gallus gallus]
425204	2553	185	60	-1.61266	7.35346e-16	Down	4.9347e-16	GTSE1	NA	NA	NA	K10129//G-2 and S-phase expressed protein 1	gi|71896999|ref|NP_001026503.1|//G2 and S phase-expressed protein 1 [Gallus gallus]
100189558	1571	61	1	-5.91891	7.69213e-16	Down	5.1677e-16	ANGPTL3	GO:0005615//extracellular space;GO:0009986//cell surface;GO:0005794//Golgi apparatus;GO:0005769//early endosome	GO:0004859//phospholipase inhibitor activity;GO:0008083//growth factor activity;GO:0005178//integrin binding	GO:0051005//negative regulation of lipoprotein lipase activity;GO:0008203//cholesterol metabolic process;GO:0030335//positive regulation of cell migration;GO:0006071//glycerol metabolic process;GO:0070328//triglyceride homeostasis;GO:0006631//fatty acid metabolic process;GO:0042632//cholesterol homeostasis;GO:0045766//positive regulation of angiogenesis;GO:0055091//phospholipid homeostasis;GO:000…	K08767//angiopoietin-like 4	gi|205361182|ref|NP_001128594.1|//angiopoietin-related protein 3 precursor [Gallus gallus]
770922	1075	376	184	-1.0192	8.06011e-16	Down	5.42241e-16	DGUOK	NA	GO:0005524//ATP binding;GO:0004136//deoxyadenosine kinase activity	GO:0016310//phosphorylation;GO:0006170//dAMP biosynthetic process	K00893//deoxycitidine kinase [EC:2.7.1.74]	gi|118405184|ref|NP_001072968.1|//deoxyguanosine kinase [Gallus gallus]
417030	1327	347	164	-1.06941	8.46096e-16	Down	5.6968e-16	SDSL	NA	NA	NA	K17989//L-serine/L-threonine ammonia-lyase [EC:4.3.1.17 4.3.1.19]	gi|310772217|ref|NP_001185572.1|//serine dehydratase-like [Gallus gallus]
693263	1392	79	8	-3.29195	8.85894e-16	Down	5.96971e-16	PGLYRP2	GO:0070062//extracellular exosome	GO:0008745//N-acetylmuramoyl-L-alanine amidase activity;GO:0008270//zinc ion binding;GO:0042834//peptidoglycan binding;GO:0016019//peptidoglycan receptor activity	GO:0016045//detection of bacterium;GO:0032827//negative regulation of natural killer cell differentiation involved in immune response;GO:0050727//regulation of inflammatory response;GO:0044117//growth of symbiont in host;GO:0002221//pattern recognition receptor signaling pathway;GO:0050830//defense response to Gram-positive bacterium;GO:0009253//peptidoglycan catabolic process;GO:0032689//negativ…	K01446//peptidoglycan recognition protein	gi|113206156|ref|NP_001038151.1|//N-acetylmuramoyl-L-alanine amidase precursor [Gallus gallus]
415470	3495	79	8	-3.29195	8.85894e-16	Down	5.96971e-16	TMC3	GO:0016021//integral component of membrane	NA	GO:0006811//ion transport	K10877//DNA repair and recombination protein RAD54B [EC:3.6.4.-]	gi|971412984|ref|XP_015147482.1|//PREDICTED: transmembrane channel-like protein 3 isoform X1 [Gallus gallus];gi|54262214|ref|NP_001005820.1|//transmembrane channel-like protein 3 [Gallus gallus]
107052767	984	62.96	0	-6.96453	9.17107e-16	Down	6.18516e-16	LOC107052767	NA	NA	NA	K19467//matrilin-3	gi|971384665|ref|XP_015138439.1|//PREDICTED: LOW QUALITY PROTEIN: matrilin-2-like, partial [Gallus gallus]
107049386	960	0	62.36	6.97438	9.77929e-16	Up	6.60081e-16	LOC107049386	NA	NA	NA	NA	gi|971446697|ref|XP_015128348.1|//PREDICTED: uncharacterized protein LOC107049386, partial [Gallus gallus]
419757	757	94	14	-2.7354	9.98324e-16	Down	6.74219e-16	TTC36	NA	NA	NA	K09560//suppressor of tumorigenicity protein 13;K09186//histone-lysine N-methyltransferase MLL1 [EC:2.1.1.43]	gi|489407148|ref|NP_001264991.1|//tetratricopeptide repeat protein 36 [Gallus gallus];gi|971431398|ref|XP_015153480.1|//PREDICTED: tetratricopeptide repeat protein 36 isoform X1 [Gallus gallus]
100859605	1288	72	202	1.50012	1.00401e-15	Up	6.78248e-16	LOC100859605	NA	NA	NA	K06770//myelin protein zero	gi|971445458|ref|XP_015158025.1|//PREDICTED: LOW QUALITY PROTEIN: myelin protein P0 [Gallus gallus]
395245	1107	114.2	23	-2.30003	1.03684e-15	Down	7.00808e-16	MSX2	GO:0005634//nucleus	GO:0000977//RNA polymerase II regulatory region sequence-specific DNA binding;GO:0003712//transcription cofactor activity;GO:0008134//transcription factor binding;GO:0001227//transcriptional repressor activity, RNA polymerase II transcription regulatory region sequence-specific binding	GO:0003148//outflow tract septum morphogenesis;GO:0009952//anterior/posterior pattern specification;GO:2000678//negative regulation of transcription regulatory region DNA binding;GO:0003198//epithelial to mesenchymal transition involved in endocardial cushion formation;GO:0060364//frontal suture morphogenesis;GO:0002063//chondrocyte development;GO:0090427//activation of meiosis;GO:0030513//positi…	K09341//homeobox protein MSX	gi|45383057|ref|NP_989890.1|//homeobox protein MSX-2 [Gallus gallus]
107056139	1273	273.57	115.23	-1.23556	1.0454e-15	Down	7.06942e-16	LOC107056139	NA	NA	NA	K08069//pantetheine hydrolase [EC:3.5.1.92]	gi|971442350|ref|XP_015156659.1|//PREDICTED: pantetheinase-like [Gallus gallus]
101749992	6235	22.19	110.09	2.32253	1.77752e-15	Up	1.21466e-15	LOC101749992	NA	NA	NA	NA	gi|971440487|ref|XP_015136230.1|//PREDICTED: uncharacterized protein LOC101749992 isoform X2 [Gallus gallus];gi|971440395|ref|XP_015136198.1|//PREDICTED: LOW QUALITY PROTEIN: uncharacterized protein LOC101749525 [Gallus gallus]
429646	903	340.71	161.44	-1.06572	1.82962e-15	Down	1.25095e-15	CHIR-B6	NA	NA	NA	K06264//platelet glycoprotein VI;K06512//leukocyte immunoglobulin-like receptor	gi|971447923|ref|XP_015128879.1|//PREDICTED: immunoglobulin superfamily member 1 [Gallus gallus]
421607	3199	213	78	-1.43748	1.83499e-15	Down	1.25496e-15	KIF18A	NA	NA	NA	K10401//kinesin family member 18/19	gi|313661478|ref|NP_001186355.1|//kinesin-like protein KIF18A [Gallus gallus]
422950	2779	316.78	145.15	-1.11411	1.87575e-15	Down	1.28319e-15	EGR4	NA	NA	NA	K12498//early growth response protein 4	gi|50747472|ref|XP_420888.1|//PREDICTED: early growth response protein 4 [Gallus gallus]
101752158	2049	331	155	-1.08273	2.02168e-15	Down	1.38452e-15	LOC101752158	GO:0005887//integral component of plasma membrane	GO:0004930//G-protein coupled receptor activity	GO:0007186//G-protein coupled receptor signaling pathway	K04303//MAS1 oncogene	gi|974987279|ref|NP_001305928.1|//uncharacterized protein LOC101752158 [Gallus gallus]
100859821	898	163.13	337.95	1.06262	2.12309e-15	Up	1.45594e-15	VSTM5	GO:0016021//integral component of membrane	NA	NA	K06089//junctional adhesion molecule 1	gi|513166181|ref|XP_003640617.2|//PREDICTED: V-set and transmembrane domain-containing protein 5 [Gallus gallus]
416776	2808	277	119	-1.20709	2.27698e-15	Down	1.56275e-15	CDC45	NA	NA	NA	K06628//cell division control protein 45	gi|118098379|ref|XP_415070.2|//PREDICTED: cell division control protein 45 homolog isoform X1 [Gallus gallus];gi|513209715|ref|XP_004945543.1|//PREDICTED: cell division control protein 45 homolog isoform X2 [Gallus gallus]
417385	3910	178	58	-1.60592	3.06782e-15	Down	2.11978e-15	NOTUM	NA	NA	NA	K19882//O-palmitoleoyl-L-serine hydrolase [EC:3.1.1.98]	gi|971424597|ref|XP_015150839.1|//PREDICTED: palmitoleoyl-protein carboxylesterase NOTUM [Gallus gallus]
422217	2669	10	81	3.02975	3.3741e-15	Up	2.33518e-15	GDPD2	GO:0016021//integral component of membrane	GO:0008889//glycerophosphodiester phosphodiesterase activity	GO:0006629//lipid metabolic process	K01124//glycerophosphoinositol inositolphosphodiesterase [EC:3.1.4.43]	gi|971391771|ref|XP_420208.5|//PREDICTED: glycerophosphoinositol inositolphosphodiesterase GDPD2 [Gallus gallus]
100858107	2250	351.84	170.96	-1.02943	3.9637e-15	Down	2.75135e-15	LOC100858107	NA	NA	NA	K04944//potassium intermediate/small conductance calcium-activated channel subfamily N member 3	gi|971432631|ref|XP_015153999.1|//PREDICTED: small conductance calcium-activated potassium channel protein 3 [Gallus gallus]
426992	2586	79	9	-3.12203	3.96497e-15	Down	2.75297e-15	ACSM5	NA	GO:0003824//catalytic activity	GO:0008152//metabolic process	K01896//medium-chain acyl-CoA synthetase [EC:6.2.1.2]	gi|363739789|ref|XP_424596.3|//PREDICTED: acyl-coenzyme A synthetase ACSM3, mitochondrial [Gallus gallus]
419080	4023	57.9	1	-5.84366	3.99252e-15	Down	2.77284e-15	LOC419080	GO:0016021//integral component of membrane;GO:0005886//plasma membrane	GO:0003707//steroid hormone receptor activity;GO:0004984//olfactory receptor activity;GO:0004930//G-protein coupled receptor activity	GO:0007186//G-protein coupled receptor signaling pathway;GO:0050911//detection of chemical stimulus involved in sensory perception of smell;GO:0045777//positive regulation of blood pressure;GO:1900135//positive regulation of renin secretion into blood stream;GO:0043401//steroid hormone mediated signaling pathway;GO:0071398//cellular response to fatty acid	K04257//olfactory receptor	gi|513233840|ref|XP_004949868.1|//PREDICTED: olfactory receptor 51E2-like [Gallus gallus]
395504	2153	68	5	-3.7537	4.00593e-15	Down	2.78289e-15	GATM	GO:0005743//mitochondrial inner membrane	GO:0015068//glycine amidinotransferase activity	GO:0006601//creatine biosynthetic process	K00613//glycine amidinotransferase [EC:2.1.4.1]	gi|45382065|ref|NP_990076.1|//glycine amidinotransferase, mitochondrial [Gallus gallus];gi|971412946|ref|XP_015147461.1|//PREDICTED: glycine amidinotransferase, mitochondrial isoform X1 [Gallus gallus]
420340	6179	110	258	1.2417	4.04024e-15	Up	2.80748e-15	FER1L6	NA	NA	NA	K19949//otoferlin	gi|513173484|ref|XP_003640913.2|//PREDICTED: fer-1-like protein 6 isoform X1 [Gallus gallus];gi|513173487|ref|XP_004940086.1|//PREDICTED: fer-1-like protein 6 isoform X2 [Gallus gallus]
107057134	3183	139.02	300.98	1.12621	4.18313e-15	Up	2.91067e-15	LOC107057134	NA	NA	NA	K09453//snRNA-activating protein complex subunit 4	gi|971423829|ref|XP_015135283.1|//PREDICTED: snRNA-activating protein complex subunit 4 isoform X2 [Gallus gallus]
414340	604	62	3	-4.3574	4.43724e-15	Down	3.09243e-15	AvBD5	GO:0005576//extracellular region	NA	GO:0042742//defense response to bacterium	NA	gi|48976036|ref|NP_001001608.2|//gallinacin-5 prepropeptide precursor [Gallus gallus]
426806	1177	337	161	-1.05386	4.56696e-15	Down	3.18793e-15	GRHPR	NA	NA	NA	K00049//glyoxylate/hydroxypyruvate reductase [EC:1.1.1.79 1.1.1.81]	gi|363744954|ref|XP_424417.3|//PREDICTED: glyoxylate reductase/hydroxypyruvate reductase [Gallus gallus]
770601	3786	279	122	-1.18155	5.23719e-15	Down	3.65968e-15	B4GALNT4	NA	NA	NA	K09657//beta-1,4-N-acetylgalactosaminyltransferase 4 [EC:2.4.1.244]	gi|971396670|ref|XP_015141737.1|//PREDICTED: N-acetyl-beta-glucosaminyl-glycoprotein 4-beta-N-acetylgalactosaminyltransferase 1 isoform X1 [Gallus gallus]
107055070	4941	165.52	338.06	1.0421	5.67514e-15	Up	3.97521e-15	LOC107055070	NA	NA	NA	NA	gi|971431975|ref|XP_015153713.1|//PREDICTED: uncharacterized protein LOC107055070 [Gallus gallus]
423278	1720	51	162	1.67925	6.08113e-15	Up	4.26298e-15	PLEK2	NA	NA	NA	K19993//pleckstrin	gi|476007860|ref|NP_001264366.1|//pleckstrin-2 [Gallus gallus]
101751171	693	102	19	-2.41267	6.12531e-15	Down	4.29509e-15	LOC101751171	NA	NA	NA	NA	gi|971452210|ref|XP_004950522.2|//PREDICTED: germin-like protein subfamily 2 member 2 [Gallus gallus]
416335	4178	104	20	-2.36668	6.73854e-15	Down	4.73637e-15	SHROOM1	NA	NA	NA	K18625//protein Shroom	gi|971418530|ref|XP_015149553.1|//PREDICTED: protein Shroom1 isoform X1 [Gallus gallus];gi|971418536|ref|XP_015149556.1|//PREDICTED: protein Shroom1 isoform X2 [Gallus gallus];gi|971418538|ref|XP_015149557.1|//PREDICTED: protein Shroom1 isoform X3 [Gallus gallus]
107050094	1579	158.63	327.63	1.05823	6.86358e-15	Up	4.82681e-15	LOC107050094	NA	NA	NA	NA	gi|971449171|ref|XP_015129373.1|//PREDICTED: uncharacterized protein LOC107050094 [Gallus gallus]
107057483	983	58.44	0	-6.85705	7.86097e-15	Down	5.54285e-15	LOC107057483	NA	NA	NA	K19347//SUN domain-containing protein 1/2	gi|971445465|ref|XP_015158028.1|//PREDICTED: sperm-associated antigen 4 protein [Gallus gallus]
416096	2329	177	353	1.00775	8.16025e-15	Up	5.75842e-15	SHQ1	GO:0005654//nucleoplasm;GO:0005737//cytoplasm	NA	GO:2000233//negative regulation of rRNA processing;GO:0043065//positive regulation of apoptotic process;GO:0022618//ribonucleoprotein complex assembly	K14764//protein SHQ1	gi|513205733|ref|XP_004944749.1|//PREDICTED: protein SHQ1 homolog isoform X1 [Gallus gallus];gi|971416384|ref|XP_015148717.1|//PREDICTED: protein SHQ1 homolog isoform X2 [Gallus gallus]
107049803	493	136.55	36.34	-1.89797	8.25167e-15	Down	5.82601e-15	LOC107049803	NA	NA	NA	K06264//platelet glycoprotein VI;K06741//natural cytotoxicity triggering receptor 1;K06512//leukocyte immunoglobulin-like receptor	gi|971448431|ref|XP_015129090.1|//PREDICTED: natural cytotoxicity triggering receptor 1-like, partial [Gallus gallus]
770671	6503	114	25	-2.1772	8.96865e-15	Down	6.3439e-15	MMEL1	NA	NA	NA	K08635//membrane metallo-endopeptidase-like 1	gi|513219475|ref|XP_001233077.3|//PREDICTED: membrane metallo-endopeptidase-like 1 isoform X1 [Gallus gallus]
422330	624	101	19	-2.39845	1.01893e-14	Down	7.21866e-15	FGF16	GO:0005576//extracellular region	GO:0008083//growth factor activity;GO:0005104//fibroblast growth factor receptor binding	GO:0008543//fibroblast growth factor receptor signaling pathway;GO:2000546//positive regulation of endothelial cell chemotaxis to fibroblast growth factor	K04358//fibroblast growth factor	gi|113206094|ref|NP_001038115.1|//fibroblast growth factor 16 [Gallus gallus]
772072	2373	198	72	-1.4476	1.26136e-14	Down	8.98546e-15	CTD-2510F5.6	NA	NA	NA	K18734//protein SMG8	gi|971426767|ref|XP_001235261.4|//PREDICTED: proline-rich protein 11 [Gallus gallus]
423315	4176	345	169	-1.01774	1.27557e-14	Down	9.09142e-15	NPAS3	NA	NA	NA	K09098//neuronal PAS domain-containing protein 1/3	gi|971399754|ref|XP_015143131.1|//PREDICTED: neuronal PAS domain-containing protein 3 isoform X1 [Gallus gallus];gi|971399756|ref|XP_015143132.1|//PREDICTED: neuronal PAS domain-containing protein 3 isoform X2 [Gallus gallus];gi|971399760|ref|XP_015143134.1|//PREDICTED: neuronal PAS domain-containing protein 3 isoform X4 [Gallus gallus];gi|971399758|ref|XP_015143133.1|//PREDICTED: neuronal PAS do…
395801	1932	81.88	11	-2.88418	1.34803e-14	Down	9.61793e-15	IHH	GO:0005615//extracellular space;GO:0005622//intracellular;GO:0005886//plasma membrane	GO:0005113//patched binding;GO:0008233//peptidase activity;GO:0005509//calcium ion binding	GO:0030166//proteoglycan biosynthetic process;GO:0007228//positive regulation of hh target transcription factor activity;GO:1903042//negative regulation of chondrocyte hypertrophy;GO:0007267//cell-cell signaling;GO:1902733//regulation of growth plate cartilage chondrocyte differentiation;GO:0010628//positive regulation of gene expression;GO:0045669//positive regulation of osteoblast differentiati…	K11989//indian hedgehog	gi|45384428|ref|NP_990288.1|//indian hedgehog protein precursor [Gallus gallus]
107050580	317	75.33	8.47	-3.14096	1.42291e-14	Down	1.01575e-14	LOC107050580	NA	NA	NA	K07980//killer cell immunoglobulin-like receptor 3DL;K06264//platelet glycoprotein VI;K06512//leukocyte immunoglobulin-like receptor	gi|971450207|ref|XP_015129790.1|//PREDICTED: platelet glycoprotein VI-like, partial [Gallus gallus]
770428	2540	100	19	-2.3841	1.69205e-14	Down	1.21165e-14	IL22RA2	GO:0005829//cytosol;GO:0016021//integral component of membrane;GO:0005886//plasma membrane	GO:0042018//interleukin-22 receptor activity;GO:0042017//interleukin-22 binding	GO:0019221//cytokine-mediated signaling pathway;GO:0050728//negative regulation of inflammatory response	K05139//interleukin 22 receptor alpha 2	gi|513176862|ref|XP_004935761.1|//PREDICTED: interleukin-22 receptor subunit alpha-2 isoform X2 [Gallus gallus];gi|513176856|ref|XP_001233762.3|//PREDICTED: interleukin-22 receptor subunit alpha-2 isoform X1 [Gallus gallus]
100857686	998	90	223	1.32088	1.81487e-14	Up	1.30129e-14	LOC100857686	NA	NA	NA	NA	gi|513179359|ref|XP_004935902.1|//PREDICTED: uncharacterized protein LOC100857686 [Gallus gallus]
418644	3512	16	92	2.53539	1.93523e-14	Up	1.39046e-14	GRM3	GO:0030424//axon;GO:0005887//integral component of plasma membrane;GO:0042734//presynaptic membrane;GO:0043197//dendritic spine;GO:0014069//postsynaptic density;GO:0045211//postsynaptic membrane	GO:0005246//calcium channel regulator activity;GO:0001641//group II metabotropic glutamate receptor activity	GO:0051966//regulation of synaptic transmission, glutamatergic;GO:0007196//adenylate cyclase-inhibiting G-protein coupled glutamate receptor signaling pathway	K04605//metabotropic glutamate receptor 2/3	gi|513157736|ref|XP_004937556.1|//PREDICTED: metabotropic glutamate receptor 3 [Gallus gallus]
426785	2080	59	3	-4.28585	2.53384e-14	Down	1.83046e-14	INDOL1	NA	NA	NA	K00463//indoleamine 2,3-dioxygenase [EC:1.13.11.52]	gi|363742149|ref|XP_424397.3|//PREDICTED: indoleamine 2,3-dioxygenase 2 [Gallus gallus]
107057408	3073	164.85	331.83	1.02112	2.69368e-14	Up	1.94744e-14	LOC107057408	NA	NA	NA	NA	gi|971445299|ref|XP_015157949.1|//PREDICTED: uncharacterized protein LOC107057408 isoform X2 [Gallus gallus];gi|971445297|ref|XP_015157948.1|//PREDICTED: uncharacterized protein LOC107057408 isoform X1 [Gallus gallus]
415465	6999	240.56	100.23	-1.25125	2.95279e-14	Down	2.13696e-14	ADAMTSL3	GO:0005578//proteinaceous extracellular matrix	GO:0008237//metallopeptidase activity;GO:0008270//zinc ion binding	GO:0006508//proteolysis	K08625//a disintegrin and metalloproteinase with thrombospondin motifs 10 [EC:3.4.24.-];K08621//a disintegrin and metalloproteinase with thrombospondin motifs 6 [EC:3.4.24.-]	gi|363737576|ref|XP_413844.3|//PREDICTED: ADAMTS-like protein 3 isoform X1 [Gallus gallus];gi|513201569|ref|XP_004943885.1|//PREDICTED: ADAMTS-like protein 3 isoform X2 [Gallus gallus]
100859124	1309	81.53	207.97	1.3628	3.44302e-14	Up	2.49559e-14	GZMM	NA	NA	NA	K08649//granzyme M [EC:3.4.21.-]	gi|971436247|ref|XP_003642924.3|//PREDICTED: granzyme M-like [Gallus gallus]
425056	1644	192	70	-1.44385	3.50778e-14	Down	2.54383e-14	CYP17A1	GO:0016020//membrane;GO:0030424//axon;GO:0005739//mitochondrion;GO:0043025//neuronal cell body	GO:0020037//heme binding;GO:0005506//iron ion binding;GO:0004508//steroid 17-alpha-monooxygenase activity;GO:0047442//17-alpha-hydroxyprogesterone aldolase activity	GO:0006704//glucocorticoid biosynthetic process;GO:0042446//hormone biosynthetic process;GO:0007548//sex differentiation;GO:0042448//progesterone metabolic process;GO:0055114//oxidation-reduction process	K00512//steroid 17alpha-monooxygenase / 17alpha-hydroxyprogesterone deacetylase [EC:1.14.14.19 1.14.14.32]	gi|50053695|ref|NP_001001901.1|//steroid 17-alpha-hydroxylase/17,20 lyase precursor [Gallus gallus]
422135	5356	170	57	-1.56467	3.80876e-14	Down	2.76635e-14	ERCC6L	NA	NA	NA	K20093//DNA excision repair protein ERCC-6-like [EC:3.6.4.12]	gi|363732948|ref|XP_420137.3|//PREDICTED: DNA excision repair protein ERCC-6-like [Gallus gallus]
415363	2262	265	117.01	-1.16753	4.279e-14	Down	3.11108e-14	CIB2	GO:0072562//blood microparticle;GO:0001917//photoreceptor inner segment;GO:0005829//cytosol;GO:0031594//neuromuscular junction;GO:0032420//stereocilium;GO:0042383//sarcolemma;GO:0001750//photoreceptor outer segment;GO:0005927//muscle tendon junction	GO:0000287//magnesium ion binding;GO:0005178//integrin binding;GO:0005509//calcium ion binding;GO:0042803//protein homodimerization activity	GO:0071318//cellular response to ATP;GO:0007204//positive regulation of cytosolic calcium ion concentration;GO:0045494//photoreceptor cell maintenance	K17259//calcium and integrin-binding protein 1;K16310//serine/threonine-protein kinase NIM1 [EC:2.7.11.1]	gi|944211306|gb|KQK78053.1|//calcium and integrin-binding family member 2 [Amazona aestiva];gi|513201006|ref|XP_004943777.1|//PREDICTED: calcium and integrin-binding family member 2 isoform X2 [Gallus gallus];gi|513201009|ref|XP_004943778.1|//PREDICTED: calcium and integrin-binding family member 2 isoform X3 [Gallus gallus];gi|513201014|ref|XP_004943779.1|//PREDICTED: calcium and integrin-binding…
107056904	2507	117.61	28.46	-2.03517	4.49251e-14	Down	3.26799e-14	LOC107056904	NA	NA	NA	K16494//protocadherin beta	gi|971443967|ref|XP_015157355.1|//PREDICTED: protocadherin beta-15-like [Gallus gallus]
107052466	1191	120.73	265.79	1.15033	6.13048e-14	Up	4.48343e-14	LOC107052466	GO:0005615//extracellular space;GO:0044194//cytolytic granule	GO:0003950//NAD+ ADP-ribosyltransferase activity;GO:0003956//NAD(P)+-protein-arginine ADP-ribosyltransferase activity	GO:0046677//response to antibiotic;GO:0006471//protein ADP-ribosylation	K06716//ADP-ribosyltransferase 1 [EC:2.4.2.31]	gi|971379042|ref|XP_015136470.1|//PREDICTED: NAD(P)(+)--arginine ADP-ribosyltransferase 1-like [Gallus gallus]
100859777	3260	60.4	4	-3.90465	6.1738e-14	Down	4.51741e-14	LOC100859777	GO:0016020//membrane	GO:0005044//scavenger receptor activity	GO:0006898//receptor-mediated endocytosis	K13912//deleted in malignant brain tumors 1 protein	gi|971441063|ref|XP_015156102.1|//PREDICTED: deleted in malignant brain tumors 1 protein-like [Gallus gallus]
428406	1544	101	236	1.23626	6.97709e-14	Up	5.11687e-14	CRYGN	NA	NA	NA	K13596//activin receptor type-2B [EC:2.7.11.30];K16810//TBCC domain-containing protein 1;K01886//glutaminyl-tRNA synthetase [EC:6.1.1.18]	gi|971379603|ref|XP_015136697.1|//PREDICTED: gamma-crystallin N isoform X1 [Gallus gallus];gi|971379605|ref|XP_015136698.1|//PREDICTED: gamma-crystallin N isoform X2 [Gallus gallus];gi|971379608|ref|XP_015136699.1|//PREDICTED: gamma-crystallin N isoform X3 [Gallus gallus];gi|325197231|ref|NP_001160146.2|//gamma-crystallin N [Gallus gallus]
100857929	1057	161	53	-1.59117	8.95663e-14	Down	6.60194e-14	CRABP2	GO:0070062//extracellular exosome;GO:0005654//nucleoplasm;GO:0005783//endoplasmic reticulum	GO:0016918//retinal binding;GO:0001972//retinoic acid binding;GO:0005215//transporter activity;GO:0019841//retinol binding	GO:0006810//transport;GO:0042573//retinoic acid metabolic process;GO:0048385//regulation of retinoic acid receptor signaling pathway;GO:0048672//positive regulation of collateral sprouting;GO:0035115//embryonic forelimb morphogenesis	K17289//cellular retinoic acid-binding protein 2	gi|326935555|ref|XP_003213835.1|//PREDICTED: cellular retinoic acid-binding protein 2 [Meleagris gallopavo]
418939	10559	72	190	1.41176	9.81528e-14	Up	7.24581e-14	FAM123A	NA	NA	NA	K19407//APC membrane recruitment protein 1	gi|513165854|ref|XP_004938851.1|//PREDICTED: APC membrane recruitment protein 2 [Gallus gallus]
426897	2907	111.97	251.03	1.17658	1.10998e-13	Up	8.21056e-14	LOC426897	NA	NA	NA	K07605//type II keratin, basic	gi|971437190|ref|XP_015155865.1|//PREDICTED: keratin, type II cytoskeletal cochleal isoform X3 [Gallus gallus];gi|971437186|ref|XP_015155864.1|//PREDICTED: keratin, type II cuticular Hb4 isoform X1 [Gallus gallus];gi|971437188|ref|XP_424505.4|//PREDICTED: keratin, type II cuticular Hb4 isoform X2 [Gallus gallus]
770939	2543	256	113	-1.16799	1.1179e-13	Down	8.27333e-14	C11ORF52	NA	NA	NA	NA	gi|513222555|ref|XP_004948208.1|//PREDICTED: uncharacterized protein C11orf52 homolog isoform X5 [Gallus gallus];gi|971432176|ref|XP_015153795.1|//PREDICTED: uncharacterized protein C11orf52 homolog isoform X1 [Gallus gallus];gi|971432178|ref|XP_015153796.1|//PREDICTED: uncharacterized protein C11orf52 homolog isoform X2 [Gallus gallus];gi|971432180|ref|XP_015153797.1|//PREDICTED: uncharacterized…
107055808	1150	22.39	102.17	2.20188	1.13712e-13	Up	8.41766e-14	LOC107055808	NA	NA	NA	K06106//cortactin	gi|971441716|ref|XP_015156394.1|//PREDICTED: hematopoietic lineage cell-specific protein-like [Gallus gallus]
415952	864	196.34	74.87	-1.37906	1.33163e-13	Down	9.86996e-14	CENPP	GO:0005730//nucleolus;GO:0000775//chromosome, centromeric region	NA	GO:0034080//CENP-A containing nucleosome assembly	K11508//centromere protein P	gi|971415947|ref|XP_015148534.1|//PREDICTED: centromere protein P isoform X1 [Gallus gallus];gi|971415949|ref|XP_015148535.1|//PREDICTED: centromere protein P isoform X2 [Gallus gallus];gi|971415953|ref|XP_015148537.1|//PREDICTED: centromere protein P isoform X4 [Gallus gallus];gi|971415951|ref|XP_015148536.1|//PREDICTED: centromere protein P isoform X3 [Gallus gallus];gi|113206064|ref|NP_0010381…
420989	9753	15	86	2.5312	1.40722e-13	Up	1.04486e-13	AHRR	GO:0005667//transcription factor complex;GO:0034753//nuclear aryl hydrocarbon receptor complex	GO:0001046//core promoter sequence-specific DNA binding;GO:0043425//bHLH transcription factor binding;GO:0046982//protein heterodimerization activity;GO:0001191//transcriptional repressor activity, RNA polymerase II transcription factor binding	GO:0000122//negative regulation of transcription from RNA polymerase II promoter;GO:0045944//positive regulation of transcription from RNA polymerase II promoter;GO:0009410//response to xenobiotic stimulus	K09094//aryl hydrocarbon receptor repressor	gi|319402133|ref|NP_001188316.1|//aryl hydrocarbon receptor repressor [Gallus gallus]
107049680	432	165	56	-1.54714	1.4119e-13	Down	1.04859e-13	LOC107049680	NA	NA	NA	K02147//V-type H+-transporting ATPase subunit B	gi|971448021|ref|XP_015128919.1|//PREDICTED: V-type proton ATPase subunit B, kidney isoform-like, partial [Gallus gallus]
418560	1448	74	192	1.38734	1.52999e-13	Up	1.13772e-13	NDP	GO:0031012//extracellular matrix;GO:0005615//extracellular space;GO:0009986//cell surface	GO:0005125//cytokine activity;GO:0042803//protein homodimerization activity;GO:0005109//frizzled binding	GO:0060070//canonical Wnt signaling pathway;GO:0051091//positive regulation of sequence-specific DNA binding transcription factor activity;GO:0035426//extracellular matrix-cell signaling;GO:0045893//positive regulation of transcription, DNA-templated;GO:0061299//retina vasculature morphogenesis in camera-type eye	NA	gi|493794945|ref|NP_001265015.1|//norrin precursor [Gallus gallus]
771555	7750	34.26	124.49	1.87326	1.57671e-13	Up	1.17304e-13	SCN1A	GO:0030315//T-tubule;GO:0030018//Z disc;GO:0043194//axon initial segment;GO:0001518//voltage-gated sodium channel complex;GO:0014704//intercalated disc;GO:0033268//node of Ranvier;GO:0043025//neuronal cell body	GO:0072345//NAADP-sensitive calcium-release channel activity;GO:0005245//voltage-gated calcium channel activity;GO:0005248//voltage-gated sodium channel activity	GO:0035725//sodium ion transmembrane transport;GO:0050884//neuromuscular process controlling posture;GO:0034765//regulation of ion transmembrane transport;GO:0019227//neuronal action potential propagation;GO:0060078//regulation of postsynaptic membrane potential;GO:0098792//xenophagy;GO:0086010//membrane depolarization during action potential;GO:0019228//neuronal action potential;GO:0007628//adul…	K04833//voltage-gated sodium channel type I alpha	gi|971405610|ref|XP_001233839.2|//PREDICTED: sodium channel protein type 1 subunit alpha isoform X3 [Gallus gallus];gi|971405616|ref|XP_004942838.2|//PREDICTED: sodium channel protein type 1 subunit alpha isoform X6 [Gallus gallus];gi|971405614|ref|XP_015145225.1|//PREDICTED: sodium channel protein type 1 subunit alpha isoform X5 [Gallus gallus];gi|971405612|ref|XP_003641635.2|//PREDICTED: sodium…
101749400	766	238.15	101.91	-1.21274	1.58498e-13	Down	1.1795e-13	LOC101749400	GO:0005635//nuclear envelope;GO:0031902//late endosome membrane	NA	GO:0010458//exit from mitosis;GO:0007034//vacuolar transport;GO:0015031//protein transport;GO:0031468//nuclear envelope reassembly	K12191//charged multivesicular body protein 2A	gi|971450432|ref|XP_015129890.1|//PREDICTED: charged multivesicular body protein 2a-like [Gallus gallus]
396218	584	124	267	1.11833	1.9083e-13	Up	1.4272e-13	LYZ	GO:0070062//extracellular exosome;GO:0005615//extracellular space	GO:0003796//lysozyme activity;GO:0042802//identical protein binding	GO:0008152//metabolic process;GO:0019835//cytolysis;GO:0001895//retina homeostasis;GO:0042742//defense response to bacterium	K13915//lysozyme C [EC:3.2.1.17]	gi|45384212|ref|NP_990612.1|//lysozyme C precursor [Gallus gallus]
101748282	1850	111	247	1.16578	2.58438e-13	Up	1.94532e-13	GJB3	GO:0005922//connexin complex;GO:0016021//integral component of membrane;GO:0005737//cytoplasm	NA	GO:0007154//cell communication	K07622//gap junction protein, beta 3	gi|513221287|ref|XP_004947838.1|//PREDICTED: gap junction beta-3 protein isoform X2 [Gallus gallus];gi|971430983|ref|XP_015153304.1|//PREDICTED: translation initiation factor IF-2 isoform X1 [Gallus gallus]
396158	4723	227	96	-1.22976	3.19562e-13	Down	2.41969e-13	MYBL1	GO:0005634//nucleus	GO:0000978//RNA polymerase II core promoter proximal region sequence-specific DNA binding;GO:0001077//transcriptional activator activity, RNA polymerase II core promoter proximal region sequence-specific binding	GO:0045944//positive regulation of transcription from RNA polymerase II promoter	K09421//myb-related protein	gi|45382545|ref|NP_990563.1|//myb-related protein A [Gallus gallus];gi|971384164|ref|XP_015138222.1|//PREDICTED: myb-related protein A isoform X1 [Gallus gallus];gi|971384166|ref|XP_015138223.1|//PREDICTED: myb-related protein A isoform X2 [Gallus gallus]
420407	505	40.78	134.54	1.73393	3.41092e-13	Up	2.58842e-13	CATH2	GO:0005576//extracellular region	GO:0001530//lipopolysaccharide binding	GO:0019835//cytolysis;GO:0050829//defense response to Gram-negative bacterium;GO:0008219//cell death;GO:0010629//negative regulation of gene expression;GO:0050830//defense response to Gram-positive bacterium;GO:0045087//innate immune response	K13916//cathelicidin antimicrobial peptide	gi|403224971|ref|NP_001020001.2|//cathelicidin-2 precursor [Gallus gallus]
422922	1305	5.07	59.67	3.56878	3.92236e-13	Up	2.98748e-13	LOC422922	NA	NA	NA	K06458//T-cell surface glycoprotein CD8 alpha chain	gi|971442773|ref|XP_015156840.1|//PREDICTED: T-cell surface glycoprotein CD8 alpha chain-like isoform X1 [Gallus gallus];gi|971442777|ref|XP_015156842.1|//PREDICTED: T-cell surface glycoprotein CD8 alpha chain-like isoform X3 [Gallus gallus];gi|971442775|ref|XP_015156841.1|//PREDICTED: T-cell surface glycoprotein CD8 alpha chain-like isoform X2 [Gallus gallus]
427977	3666	78	12	-2.68861	4.09833e-13	Down	3.12607e-13	LOC427977	NA	NA	NA	K11787//phosphoribosylamine--glycine ligase / phosphoribosylglycinamide formyltransferase / phosphoribosylformylglycinamidine cyclo-ligase [EC:6.3.4.13 2.1.2.2 6.3.3.1]	gi|971375355|ref|XP_015155581.1|//PREDICTED: trifunctional purine biosynthetic protein adenosine-3 [Gallus gallus]
421292	1536	54	3	-4.15809	4.67293e-13	Down	3.57219e-13	EPCAM	GO:0016323//basolateral plasma membrane;GO:0070062//extracellular exosome;GO:0009986//cell surface;GO:0005887//integral component of plasma membrane;GO:0016324//apical plasma membrane;GO:0005923//bicellular tight junction;GO:0016328//lateral plasma membrane	GO:0098641//cadherin binding involved in cell-cell adhesion;GO:0032403//protein complex binding	GO:0048863//stem cell differentiation;GO:2000648//positive regulation of stem cell proliferation;GO:0045944//positive regulation of transcription from RNA polymerase II promoter;GO:0001657//ureteric bud development;GO:2000048//negative regulation of cell-cell adhesion mediated by cadherin;GO:0023019//signal transduction involved in regulation of gene expression	K06737//epithelial cell adhesion molecule	gi|60302776|ref|NP_001012582.1|//epithelial cell adhesion molecule precursor [Gallus gallus]
428249	6726	5	59	3.57255	5.17204e-13	Up	3.96334e-13	DSCAML1	NA	NA	NA	K06768//Down syndrome cell adhesion molecule-like protein 1	gi|513222418|ref|XP_003642660.2|//PREDICTED: Down syndrome cell adhesion molecule-like protein 1 [Gallus gallus]
771804	1233	23.33	100.94	2.12507	5.21268e-13	Up	3.99546e-13	LOC771804	NA	NA	NA	K06458//T-cell surface glycoprotein CD8 alpha chain	gi|971395981|ref|XP_015141441.1|//PREDICTED: T-cell surface glycoprotein CD8 alpha chain-like isoform X1 [Gallus gallus];gi|971395991|ref|XP_015141446.1|//PREDICTED: T-cell surface glycoprotein CD8 alpha chain-like isoform X6 [Gallus gallus];gi|971395989|ref|XP_015141445.1|//PREDICTED: T-cell surface glycoprotein CD8 alpha chain-like isoform X5 [Gallus gallus];gi|971395983|ref|XP_015141442.1|//PR…
421843	2996	235.54	102.79	-1.18444	5.77387e-13	Down	4.43635e-13	UBE3D	NA	NA	NA	K20803//ubiquitin-protein ligase E3 D [EC:2.3.2.26]	gi|971389603|ref|XP_419864.5|//PREDICTED: E3 ubiquitin-protein ligase E3D isoform X1 [Gallus gallus];gi|971389606|ref|XP_004940471.2|//PREDICTED: E3 ubiquitin-protein ligase E3D isoform X2 [Gallus gallus]
373919	5241	152	303	1.00708	6.22884e-13	Up	4.79519e-13	RUNX2	GO:0005654//nucleoplasm;GO:0005667//transcription factor complex;GO:0000790//nuclear chromatin;GO:0005737//cytoplasm	GO:0000978//RNA polymerase II core promoter proximal region sequence-specific DNA binding;GO:0000979//RNA polymerase II core promoter sequence-specific DNA binding;GO:0005524//ATP binding;GO:0019904//protein domain specific binding;GO:0043425//bHLH transcription factor binding;GO:0003682//chromatin binding;GO:0070491//repressing transcription factor binding;GO:0001077//transcriptional activator a…	GO:0060317//cardiac epithelial to mesenchymal transition;GO:1990079//cartilage homeostasis;GO:0002063//chondrocyte development;GO:0032332//positive regulation of chondrocyte differentiation;GO:0045879//negative regulation of smoothened signaling pathway;GO:0001958//endochondral ossification;GO:0045892//negative regulation of transcription, DNA-templated;GO:0030182//neuron differentiation;GO:00305…	K09278//runt-related transcription factor 2	gi|971390661|ref|XP_015140566.1|//PREDICTED: runt-related transcription factor 2 isoform X1 [Gallus gallus];gi|971390667|ref|XP_015140569.1|//PREDICTED: runt-related transcription factor 2 isoform X4 [Gallus gallus];gi|45383854|ref|NP_989459.1|//runt-related transcription factor 2 [Gallus gallus];gi|971390663|ref|XP_015140567.1|//PREDICTED: runt-related transcription factor 2 isoform X2 [Gallus g…
422739	7447	59	5	-3.54888	7.30521e-13	Down	5.64691e-13	SGCZ	NA	NA	NA	K12563//delta-sarcoglycan	gi|971394999|ref|XP_015141038.1|//PREDICTED: zeta-sarcoglycan [Gallus gallus]
[truncated: 617 more rows]
